# Supplementary material for: From Potential Prebiotic Synthons to Useful Chiral Scaffolds: A Synthetic and Structural Reinvestigation of 2-Amino-Aldononitriles
Source: MDPI journal article supplement (doi:10.3390/molecules29081796), 2024-04-15
Supplement: s1 [file s1]

## Supporting Information (SI)

# 2-Amino-aldononitriles: From Potential Prebiotic Synthons to Useful Chiral Scaffolds. A Synthetic and Structural Reinvestigation

Esther Matamoros<sup>1,2,3,\*</sup>, Mark E. Light<sup>4</sup>, Pedro Cintas<sup>1</sup> and Juan C. Palacios<sup>1,\*</sup>

<sup>1</sup> Departamento de Química Orgánica e Inorgánica, Facultad de Ciencias, and Instituto del Agua, Cambio Climático y Sostenibilidad (IACYS)-Unidad de Química Verde y Desarrollo Sostenible, Universidad de Extremadura, 06006 Badajoz, Spain

<sup>2</sup> Departamento de Química Orgánica, Universidad de Málaga, Campus Teatinos s/n, 29071 Málaga, Spain

<sup>3</sup> Instituto de Investigación Biomédica de Málaga y Plataforma en Nanomedicina – IBIMA, Plataforma Bionand, Parque Tecnológico de Andalucía, 29590 Málaga, Spain

<sup>4</sup> Department of Chemistry, Faculty of Engineering and Physical Sciences, University of Southampton, Southampton SO17 1BJ, UK

\* Correspondence: esthermc@unex.es (E.M.); palacios@unex.es (J.C.P.)

### ORCID

Esther Matamoros: 0000-0003-4460-2065

Pedro Cintas: 0000-0002-2608-3604

Mark E. Light: 0000-0002-0585-0843

Juan Carlos Palacios: 0000-0002-5004-4744

### Summary

| Pages | Supporting Data                                                                                                               |
|-------|-------------------------------------------------------------------------------------------------------------------------------|
| 2     | Tables S1-S3                                                                                                                  |
| 3     | Crystallographic Data (Tables S4-S8)                                                                                          |
| 9     | IR Spectra. (Fig. S1-S18)                                                                                                     |
| 18    | Raman Spectra (Fig. S19-S22)                                                                                                  |
| 19    | NMR Spectra (Fig. S23-S92)                                                                                                    |
| 54    | Mass Spectra (Fig. S93-S110)                                                                                                  |
| 63    | Cartesian Coordinates and Calculated Energies at the M06-2X/6-311G(d,p) Level in Gas Phase and CHCl <sub>3</sub> (SMD Model). |

**Table S1.** Selected IR and Raman data for some acyl aminonitriles in the solid state.<sup>a,b</sup>

| Comp | $\bar{\nu}_{\text{NH}}^b$ | $\bar{\nu}_{\text{C}\equiv\text{N}}^b$ | $\bar{\nu}_{\text{C}\equiv\text{N}}^c$ | $\bar{\nu}_{\text{C}=\text{O}}^{b,d}$ | $\bar{\nu}_{\text{C}=\text{O}}^{c,d}$ | $\bar{\nu}_{\text{C}=\text{O}}^{b,e}$ | $\bar{\nu}_{\text{C}=\text{O}}^{c,e}$ | $\delta_{\text{NH}}^{b,f}$ |
|------|---------------------------|----------------------------------------|----------------------------------------|---------------------------------------|---------------------------------------|---------------------------------------|---------------------------------------|----------------------------|
| 11   |                           | 2239                                   | 2239                                   | 1755                                  | 1736                                  | 1649                                  | 1645                                  |                            |
| 13   |                           | 2255                                   | 2254                                   | 1749                                  | 1743                                  | 1662                                  | 1661                                  |                            |
| 17   | 3349                      | 2229                                   |                                        | 1771, 1747                            |                                       |                                       |                                       | 1509                       |
| 18   |                           | g                                      | 2250                                   | 1730                                  | 1732                                  | 1655                                  | 1658                                  |                            |
| 20   |                           | g                                      | 2246                                   | 1742, 1720                            | 1716                                  | 1639                                  | 1639                                  |                            |
| 37   |                           | 2247                                   |                                        | 1754                                  |                                       | 1672                                  |                                       |                            |
| 38   |                           | 2240 <sup>h</sup>                      |                                        | 1750                                  |                                       | 1670                                  |                                       |                            |
| 42   | 3347                      | 2239                                   | 2236                                   | 1763, 1743                            | 1737                                  |                                       |                                       |                            |
| 43   |                           | 2237                                   | 2243                                   | 1765, 1744                            | 1751                                  | 1673                                  | 1671                                  |                            |
| 47   | 3237                      | 2243                                   | 2243                                   | 1753, 1730                            | 1753, 1728                            | 1675, 1645                            | 1643                                  | 1541                       |
| 51   | 3278                      | 2251                                   | 2245                                   | 1743                                  | 1734                                  | 1690, 1674                            | 1679                                  | 1503                       |

<sup>a</sup>In cm<sup>-1</sup>; <sup>b</sup>IR (KBr disc); <sup>c</sup>Raman; <sup>d</sup>Ester; <sup>e</sup>Amide band I; <sup>f</sup>Amide band II; <sup>g</sup>Not observed; <sup>h</sup>Imperceptible.

**Table S2.** <sup>1</sup>H NMR data ( $\delta$ , ppm) for some acyl aminonitriles.<sup>a</sup>

| Compo            | H-2     | H-3     | H-4     | H-5                 | H-6                 | H-6'   | H-7     | H-7'    | NCH <sub>2</sub>    | NH     |
|------------------|---------|---------|---------|---------------------|---------------------|--------|---------|---------|---------------------|--------|
| 11               | 5.48 d  | 5.57 t  | 5.57 t  | 5.11 m <sup>c</sup> | 4.27 dd             | 4.07dd | --      | --      | 3.41 m              | --     |
| 12 <sup>b</sup>  | 5.34 d  | 5.60 t  | 5.60 t  | 5.14 m <sup>c</sup> | 4.27 dd             | 4.07dd | --      | --      | 3.25 m              | --     |
| 13               | 5.38 d  | 5.57 d  | 5.44 dd | 5.40 d              | 5.23 dd             | --     | 4.28 dd | 3.85 dd | 3.39 m              | --     |
| 17               | 4.52 dd | 5.62 dd | 5.46 dd | 5.40 dd             | 5.30 m <sup>c</sup> | --     | 4.37 dd | 4.10 dd | --                  | 4.11 d |
| 18               | 5.76 bs | 6.12 m  | 6.12 m  | 6.04 m              | 5.91 bs             | --     | 4.60 dd | 4.48 dd | 3.36 m <sup>d</sup> | --     |
| 20               | 5.98 dd | 6.54 bs | 6.07 t  | 6.54 bs             | 5.85 m <sup>c</sup> | --     | 4.79 dd | 4.48 dd | 3.55 m <sup>e</sup> | --     |
| 37               | 5.38 d  | 5.53 d  | 5.58 d  | 5.32 dd             | 5.23 m              | --     | 4.29 dd | 3.86 dd | 4.58 m <sup>f</sup> | --     |
| 38Z <sup>i</sup> | 5.62 d  | 5.68 m  | 5.50 m  | 5.50 m              | 5.02 m              |        | 4.17 m  | 4.17 m  | 4.70 m <sup>g</sup> |        |
| 38E <sup>i</sup> | 3.99 d  | 5.23 dd | 5.73 dd | 5.19 dd             | 5.02 m              |        | 4.32 dd | 4.16 dd | 3.94 m <sup>h</sup> |        |
| 42               | 4.72 dd | 5.25 dd | 5.60 dd | 5.28 m <sup>c</sup> | 4.26 m              | 4.26 m |         |         |                     | 4.60 d |
| 43               | 5.73 d  | 5.68 dd | 5.53 dd | 5.09 m <sup>c</sup> | 4.27 dd             | 4.04dd |         |         |                     |        |
| 47 <sup>b</sup>  | 5.47 dd | 5.14 dd | 5.39 dd | 5.19 dt             | 4.25 m              | 4.25 m |         |         |                     | 6.77 d |
| 51               | 5.47 dd | 4.91 dd | 5.44 dd | 5.26 dd             | 5.39 m <sup>c</sup> |        | 4.26 dd | 3.85 dd |                     | 6.67 d |

<sup>a</sup>In CDCl<sub>3</sub> at 500 MHz; <sup>b</sup>In CDCl<sub>3</sub> at 400 MHz; <sup>c</sup>m = ddd; <sup>d</sup>m = 3.47 m + 3.25 m; <sup>e</sup>m = 3.60 m + 3.49 m; <sup>f</sup>m = 4.67 d + 4.44 d; <sup>g</sup>dd = 4.82 d + 4.58 d; <sup>h</sup>dd = 4.08 d + 3.80 d; <sup>i</sup>In CDCl<sub>3</sub> at 200 MHz.

**Table S3.** <sup>13</sup>C NMR data ( $\delta$ , ppm) for some acyl aminonitriles.<sup>a</sup>

| Compound         | C $\equiv$ N | C-2   | C-6   | C-7   | NCH <sub>2</sub> | NC=O   | Me <sup>d</sup> |
|------------------|--------------|-------|-------|-------|------------------|--------|-----------------|
| 11               | 114.57       | 45.37 | 61.35 |       | 42.83            |        |                 |
| 12 <sup>b</sup>  | 114.70       | 45.94 | 61.57 |       | 50.21            |        |                 |
| 13               | 114.70       | 45.18 |       | 61.74 | 42.91            |        |                 |
| 17               | 116.67       | 47.01 |       | 61.60 |                  |        |                 |
| 18               | 114.62       | 47.16 |       | 62.56 | 42.73            |        |                 |
| 20               | 114.60       | 47.38 |       | 62.32 | 43.26            |        |                 |
| 37               | 114.32       | 46.81 |       | 61.89 | 51.78            | 171.62 | 21.81           |
| 38Z <sup>c</sup> | 116.94       | 49.35 |       | 61.26 |                  | 172.06 | 21.76           |
| 38E <sup>c</sup> | 114.42       | 46.92 |       | 61.10 |                  |        |                 |
| 42               | 116.54       | 45.78 | 61.27 |       |                  |        |                 |
| 43               | 114.25       | 49.05 | 61.38 |       |                  | 170.91 | 22.42           |
| 47 <sup>b</sup>  | 115.73       | 39.23 | 61.38 |       |                  |        |                 |
| 51               | 115.75       | 38.97 |       | 61.90 |                  | 173.01 | 22.95           |

<sup>a</sup>In CDCl<sub>3</sub> at 125 MHz; <sup>b</sup>In CDCl<sub>3</sub> at 100 MHz; <sup>c</sup>In CDCl<sub>3</sub> at 50 MHz; <sup>d</sup>Acetamido group.

**Table S4.** Crystal data and structure refinement details of **13**

|                                                                               |                                                                           |                                                                                     |
|-------------------------------------------------------------------------------|---------------------------------------------------------------------------|-------------------------------------------------------------------------------------|
| Identification code                                                           | <b>2011acc0771</b>                                                        | 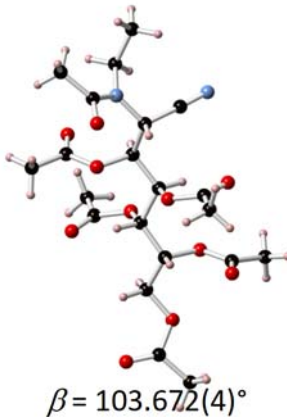 |
| Empirical formula                                                             | C <sub>21</sub> H <sub>30</sub> N <sub>2</sub> O <sub>11</sub>            |                                                                                     |
| Formula weight                                                                | 486.47                                                                    |                                                                                     |
| Temperature                                                                   | 100(2) K                                                                  |                                                                                     |
| Wavelength                                                                    | 0.71075 Å                                                                 |                                                                                     |
| Crystal system                                                                | Monoclinic                                                                |                                                                                     |
| Space group                                                                   | <i>P</i> 2 <sub>1</sub>                                                   |                                                                                     |
| Unit cell dimensions                                                          | <i>a</i> = 8.689(2) Å<br><i>b</i> = 12.613(3) Å<br><i>c</i> = 11.114(3) Å | $\beta = 103.672(4)^\circ$                                                          |
| Volume                                                                        | 1183.4(5) Å <sup>3</sup>                                                  |                                                                                     |
| <i>Z</i>                                                                      | 2                                                                         |                                                                                     |
| Density (calculated)                                                          | 1.365 Mg / m <sup>3</sup>                                                 |                                                                                     |
| Absorption coefficient                                                        | 0.111 mm <sup>-1</sup>                                                    |                                                                                     |
| <i>F</i> (000)                                                                | 516                                                                       |                                                                                     |
| Crystal                                                                       | Fragment; Colourless                                                      |                                                                                     |
| Crystal size                                                                  | 0.20 × 0.10 × 0.03 mm <sup>3</sup>                                        |                                                                                     |
| $\theta$ range for data collection                                            | 3.14 – 27.48°                                                             |                                                                                     |
| Index ranges                                                                  | –11 ≤ <i>h</i> ≤ 6, –10 ≤ <i>k</i> ≤ 16, –14 ≤ <i>l</i> ≤ 14              |                                                                                     |
| Reflections collected                                                         | 6306                                                                      |                                                                                     |
| Independent reflections                                                       | 2828 [ <i>R</i> <sub>int</sub> = 0.0245]                                  |                                                                                     |
| Completeness to $\theta = 27.48^\circ$                                        | 99.5 %                                                                    |                                                                                     |
| Absorption correction                                                         | Semi-empirical from equivalents                                           |                                                                                     |
| Max. and min. transmission                                                    | 0.9967 and 0.9781                                                         |                                                                                     |
| Refinement method                                                             | Full-matrix least-squares on <i>F</i> <sup>2</sup>                        |                                                                                     |
| Data / restraints / parameters                                                | 2828 / 1 / 314                                                            |                                                                                     |
| Goodness-of-fit on <i>F</i> <sup>2</sup>                                      | 1.038                                                                     |                                                                                     |
| Final <i>R</i> indices [ <i>F</i> <sup>2</sup> > 2σ( <i>F</i> <sup>2</sup> )] | <i>R</i> 1 = 0.0379, <i>wR</i> 2 = 0.0855                                 |                                                                                     |
| <i>R</i> indices (all data)                                                   | <i>R</i> 1 = 0.0424, <i>wR</i> 2 = 0.0877                                 |                                                                                     |
| Largest diff. peak and hole                                                   | 0.278 and –0.179 e Å <sup>-3</sup>                                        |                                                                                     |

**Table S5.** Crystal data and structure refinement details of **37**

| Compound                                       | 2012acc0031                                                    |
|------------------------------------------------|----------------------------------------------------------------|
| Formula                                        | C <sub>26</sub> H <sub>32</sub> O <sub>11</sub> N <sub>2</sub> |
| <i>D</i> <sub>calc.</sub> / g cm <sup>-3</sup> | 1.315                                                          |
| <i>m</i> /mm <sup>-1</sup>                     | 0.103                                                          |
| Formula Weight                                 | 548.53                                                         |
| Colour                                         | clear colourless                                               |
| Shape                                          | needle-shaped                                                  |
| Size/mm <sup>3</sup>                           | 0.20×0.20×0.20                                                 |
| <i>T</i> /K                                    | 100(2)                                                         |
| Crystal System                                 | monoclinic                                                     |
| Flack Parameter                                | -0.7(10)                                                       |
| Hooft Parameter                                | -1.8(10)                                                       |
| Space Group                                    | <i>C</i> 2                                                     |
| <i>a</i> /Å                                    | 19.892(11)                                                     |
| <i>b</i> /Å                                    | 6.009(3)                                                       |
| <i>c</i> /Å                                    | 23.888(12)                                                     |
| <i>a</i> /°                                    | 90                                                             |
| <i>b</i> /°                                    | 103.91(3)                                                      |
| <i>g</i> /°                                    | 90                                                             |
| <i>V</i> /Å <sup>3</sup>                       | 2772(3)                                                        |
| <i>Z</i>                                       | 4                                                              |
| <i>Z</i> '                                     | 1                                                              |
| Wavelength/Å                                   | 0.71073                                                        |
| Radiation type                                 | Mo K <sub>α</sub>                                              |
| <i>Q</i> <sub>min</sub> /°                     | 2.954                                                          |
| <i>Q</i> <sub>max</sub> /°                     | 25.026                                                         |
| Measured Refl's.                               | 10256                                                          |
| Indep't Refl's                                 | 4095                                                           |
| Refl's I≥2 σ(I)                                | 2395                                                           |
| <i>R</i> <sub>int</sub>                        | 0.0995                                                         |
| Parameters                                     | 377                                                            |
| Restraints                                     | 648                                                            |
| Largest Peak                                   | 0.307                                                          |
| Deepest Hole                                   | -0.209                                                         |
| GooF                                           | 1.070                                                          |
| <i>wR</i> <sub>2</sub> (all data)              | 0.2155                                                         |
| <i>wR</i> <sub>2</sub>                         | 0.1730                                                         |
| <i>R</i> <sub>1</sub> (all data)               | 0.1520                                                         |
| <i>R</i> <sub>1</sub>                          | 0.0903                                                         |

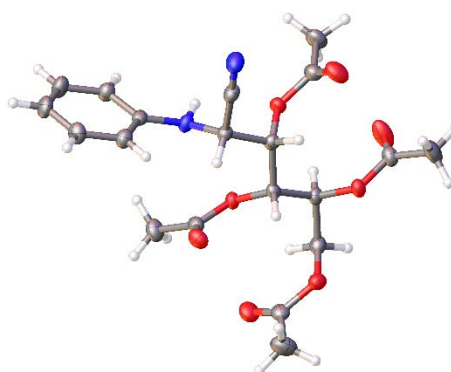

**Table S6.** Crystal data and structure refinement details of **42**.

| Compound                    | 2014acc0004                                                   |
|-----------------------------|---------------------------------------------------------------|
| Formula                     | C <sub>20</sub> H <sub>24</sub> N <sub>2</sub> O <sub>8</sub> |
| $D_{calc}/\text{g cm}^{-3}$ | 1.292                                                         |
| $\mu/\text{mm}^{-1}$        | 0.101                                                         |
| Formula Weight              | 420.41                                                        |
| Colour                      | clear colourless                                              |
| Shape                       | prism                                                         |
| Max Size/mm                 | 0.32                                                          |
| Mid Size/mm                 | 0.28                                                          |
| Min Size/mm                 | 0.20                                                          |
| $T/\text{K}$                | 120                                                           |
| Crystal System              | monoclinic                                                    |
| Space Group                 | P2 <sub>1</sub>                                               |
| $a/\text{\AA}$              | 10.0041(8)                                                    |
| $b/\text{\AA}$              | 10.3736(5)                                                    |
| $c/\text{\AA}$              | 10.8552(7)                                                    |
| $\alpha/^\circ$             | 90                                                            |
| $\beta/^\circ$              | 106.375(4)                                                    |
| $\gamma/^\circ$             | 90                                                            |
| $V/\text{\AA}^3$            | 1080.84(12)                                                   |
| $Z$                         | 2                                                             |
| $Z'$                        | 1.000                                                         |
| $\theta_{min}/^\circ$       | 3.138                                                         |
| $\theta_{max}/^\circ$       | 27.101                                                        |
| Measured Refl.              | 10823                                                         |
| Independent Refl.           | 4674                                                          |
| Reflections Used            | 4216                                                          |
| $R_{int}$                   | 0.0315                                                        |
| Parameters                  | 279                                                           |
| Restraints                  | 1                                                             |
| Largest Peak                | 0.194                                                         |
| Deepest Hole                | -0.245                                                        |
| GooF                        | 1.167                                                         |
| $wR_2$ (all data)           | 0.1017                                                        |
| $wR_2$                      | 0.0892                                                        |
| $R_1$ (all data)            | 0.0466                                                        |
| $R_1$                       | 0.0391                                                        |

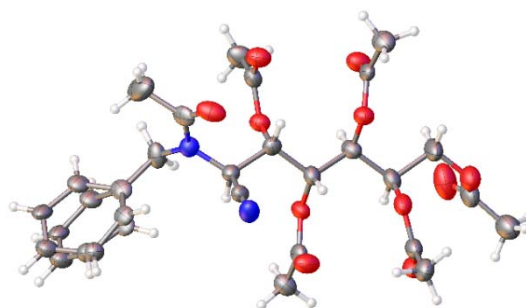

**Table S7.** Crystal data and structure refinement details of **47**

|                                             |                                                               |
|---------------------------------------------|---------------------------------------------------------------|
| Identification code                         | adona_0m                                                      |
| Empirical formula                           | C <sub>16</sub> H <sub>22</sub> N <sub>2</sub> O <sub>9</sub> |
| Formula weight                              | 386.36                                                        |
| Temperature/K                               | 170(2)                                                        |
| Crystal system                              | Orthorhombic                                                  |
| Space group                                 | P2 <sub>1</sub> 2 <sub>1</sub> 2 <sub>1</sub>                 |
| a/Å                                         | 8.3036(3)                                                     |
| b/Å                                         | 14.5478(5)                                                    |
| c/Å                                         | 15.9656(5)                                                    |
| α/°                                         | 90                                                            |
| β/°                                         | 90                                                            |
| γ/°                                         | 90                                                            |
| Volume/Å <sup>3</sup>                       | 1928.63(11)                                                   |
| Z                                           | 4                                                             |
| ρ <sub>calc</sub> /g/cm <sup>3</sup>        | 1.331                                                         |
| μ/mm <sup>-1</sup>                          | 0.11                                                          |
| F(000)                                      | 816.0                                                         |
| Crystal size/mm <sup>3</sup>                | 0.2 × 0.18 × 0.12                                             |
| Radiation                                   | MoKα (λ = 0.71073)                                            |
| 2θ range for data collection/°              | 3.78 to 60.38                                                 |
| Index ranges                                | -11 ≤ h ≤ 11, -11 ≤ k ≤ 20, -22 ≤ l ≤ 18                      |
| Reflections collected                       | 12536                                                         |
| Independent reflections                     | 5693 [R <sub>int</sub> = 0.0281, R <sub>sigma</sub> = 0.0484] |
| Data/restraints/parameters                  | 5693/0/250                                                    |
| Goodness-of-fit on F <sup>2</sup>           | 0.804                                                         |
| Final R indexes [I ≥ 2σ (I)]                | R <sub>1</sub> = 0.0444, wR <sub>2</sub> = 0.1170             |
| Final R indexes [all data]                  | R <sub>1</sub> = 0.0617, wR <sub>2</sub> = 0.1334             |
| Largest diff. peak/hole / e Å <sup>-3</sup> | 0.25/-0.21                                                    |

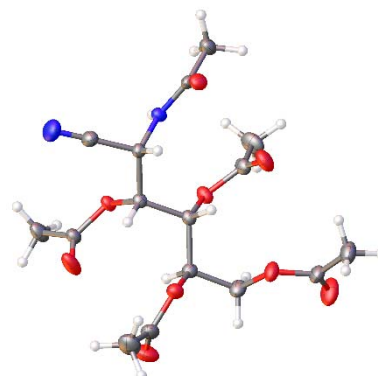

**Table S8.** Crystal data and structure refinement details of **63**.

| Compound                     | 2015acc0013_K_100K                               |
|------------------------------|--------------------------------------------------|
| Formula                      | C <sub>19</sub> H <sub>24</sub> NO <sub>12</sub> |
| $D_{calc.}/\text{g cm}^{-3}$ | 1.383                                            |
| $m/\text{mm}^{-1}$           | 0.117                                            |
| Formula Weight               | 458.39                                           |
| Colour                       | clear colourless                                 |
| Shape                        | block-shaped                                     |
| Size/mm <sup>3</sup>         | 0.13×0.05×0.02                                   |
| $T/\text{K}$                 | 100(2)                                           |
| Crystal System               | orthorhombic                                     |
| Flack Parameter              | -0.4(14)                                         |
| Hooft Parameter              | -0.4(14)                                         |
| Space Group                  | $P2_12_12_1$                                     |
| $a/\text{\AA}$               | 8.6244(3)                                        |
| $b/\text{\AA}$               | 12.0277(4)                                       |
| $c/\text{\AA}$               | 21.2251(10)                                      |
| $a^\circ$                    | 90.00                                            |
| $b^\circ$                    | 90.00                                            |
| $g^\circ$                    | 90.00                                            |
| $V/\text{\AA}^3$             | 2201.73(15)                                      |
| $Z$                          | 4                                                |
| $Z'$                         | 1                                                |
| Wavelength/ $\text{\AA}$     | 0.71073                                          |
| Radiation type               | Mo $K_\alpha$                                    |
| $Q_{min}/^\circ$             | 3.04                                             |
| $Q_{max}/^\circ$             | 28.70                                            |
| Measured Refl's.             | 12046                                            |
| Indep't Refl's               | 5634                                             |
| Refl's $I \geq 2\sigma(I)$   | 4355                                             |
| $R_{int}$                    | 0.0363                                           |
| Parameters                   | 313                                              |
| Restraints                   | 0                                                |
| Largest Peak                 | 0.445                                            |
| Deepest Hole                 | -0.305                                           |
| GooF                         | 1.040                                            |
| $wR_2$ (all data)            | 0.1707                                           |
| $wR_2$                       | 0.1575                                           |
| $R_1$ (all data)             | 0.0883                                           |
| $R_1$                        | 0.0671                                           |

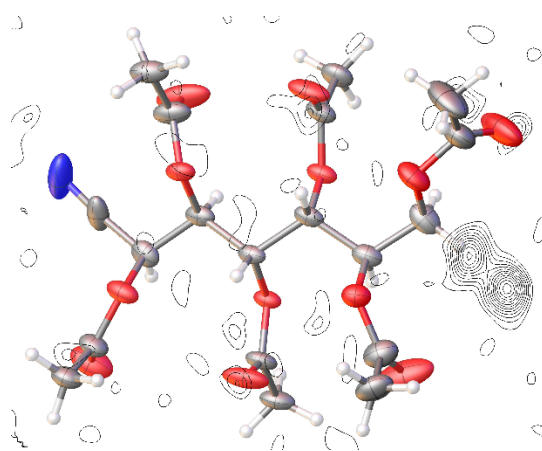

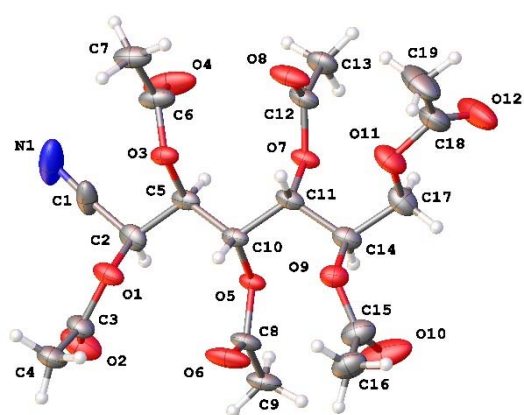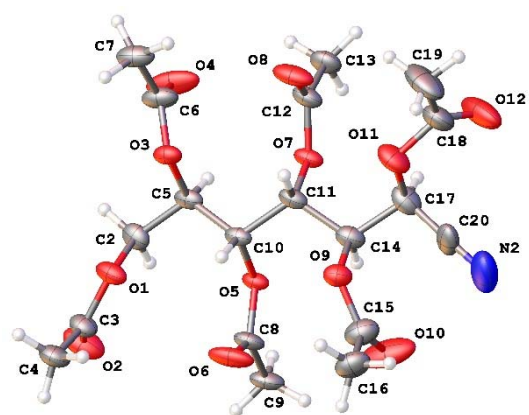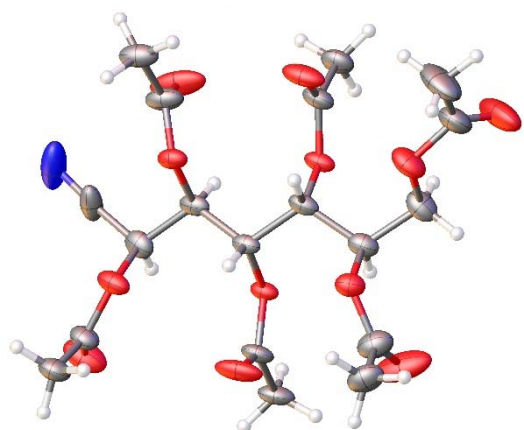

(a)

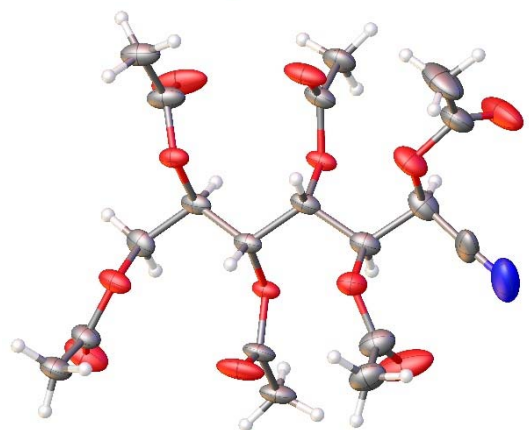

(b)

**Solid-state Orientations in the Crystal Structure for Compound 63:** Major component (a) and minor component (b), thermal ellipsoids drawn at the 50% probability level.



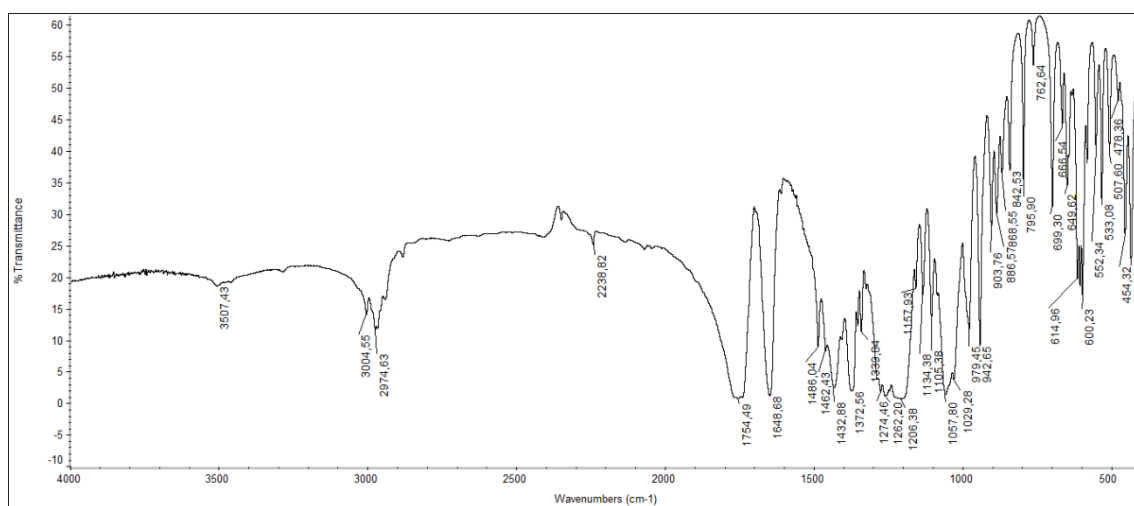

**Figure S1.** IR spectrum of **11**.

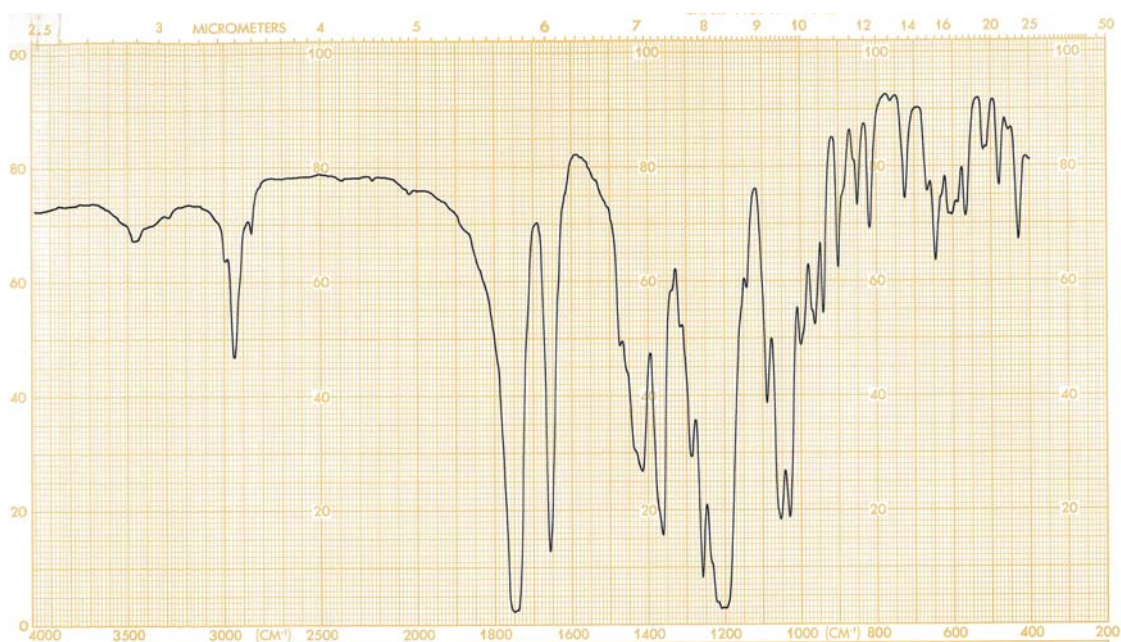

**Figure S2.** IR spectrum of **12**.

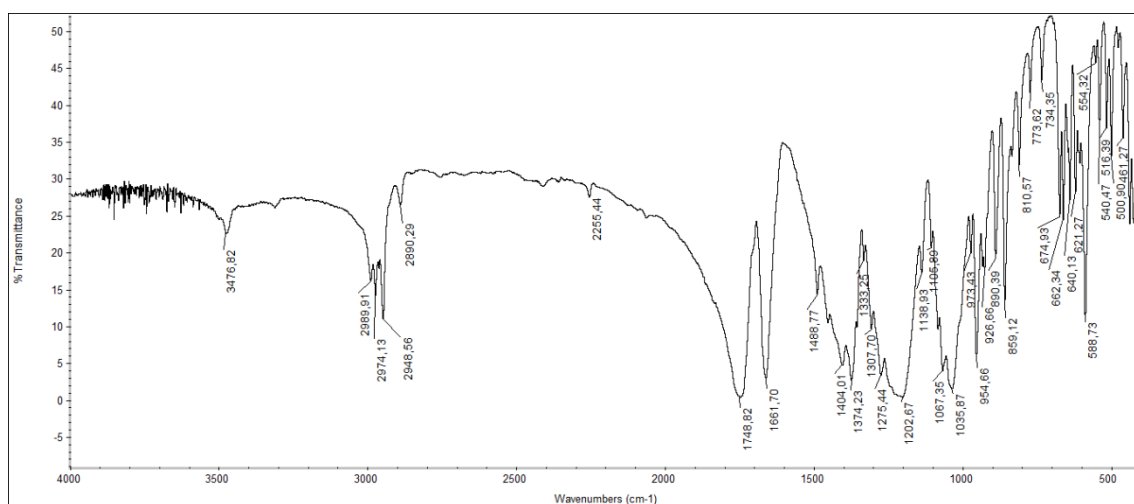

Figure S3. IR spectrum of 13.

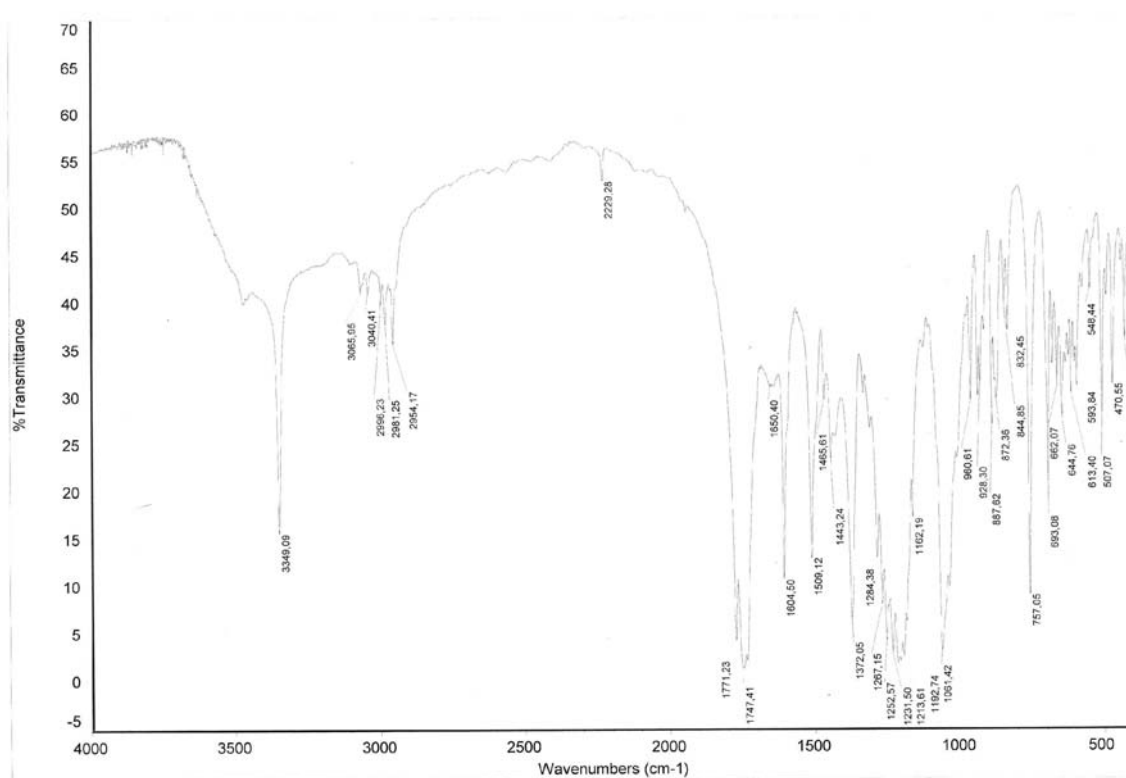

Figure S4. IR spectrum of 17.

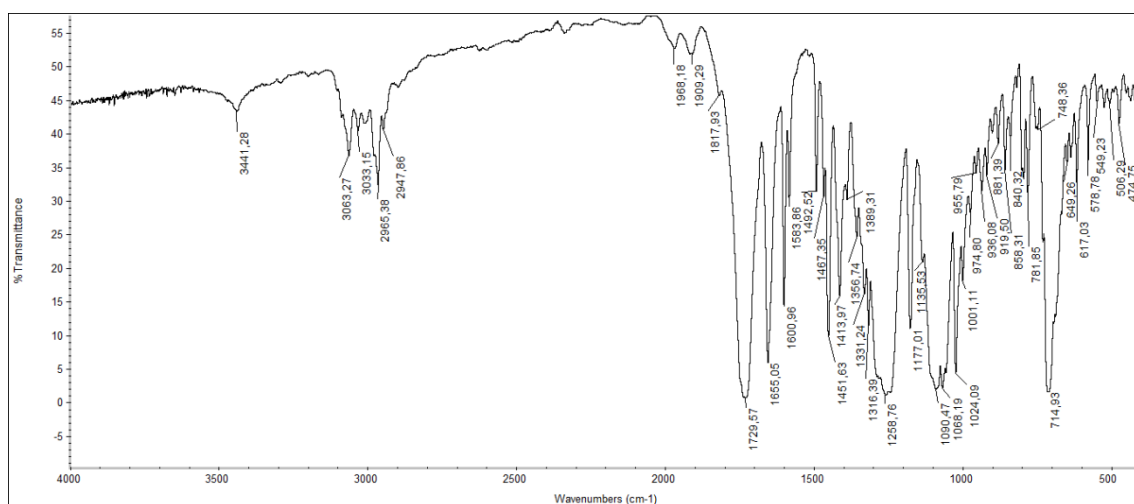

Figure S5. IR spectrum of 18.

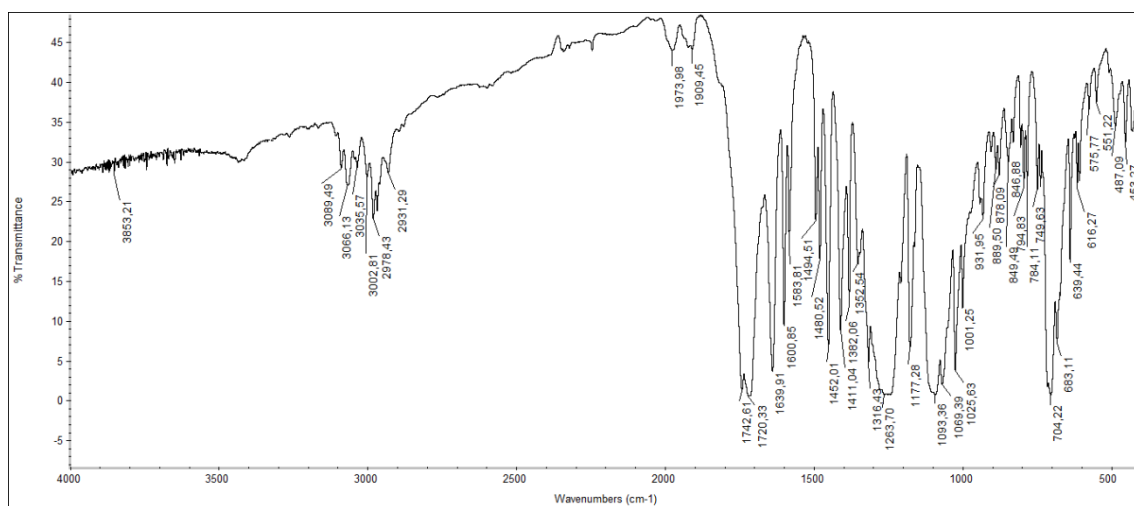

Figure S6. IR spectrum of 20.

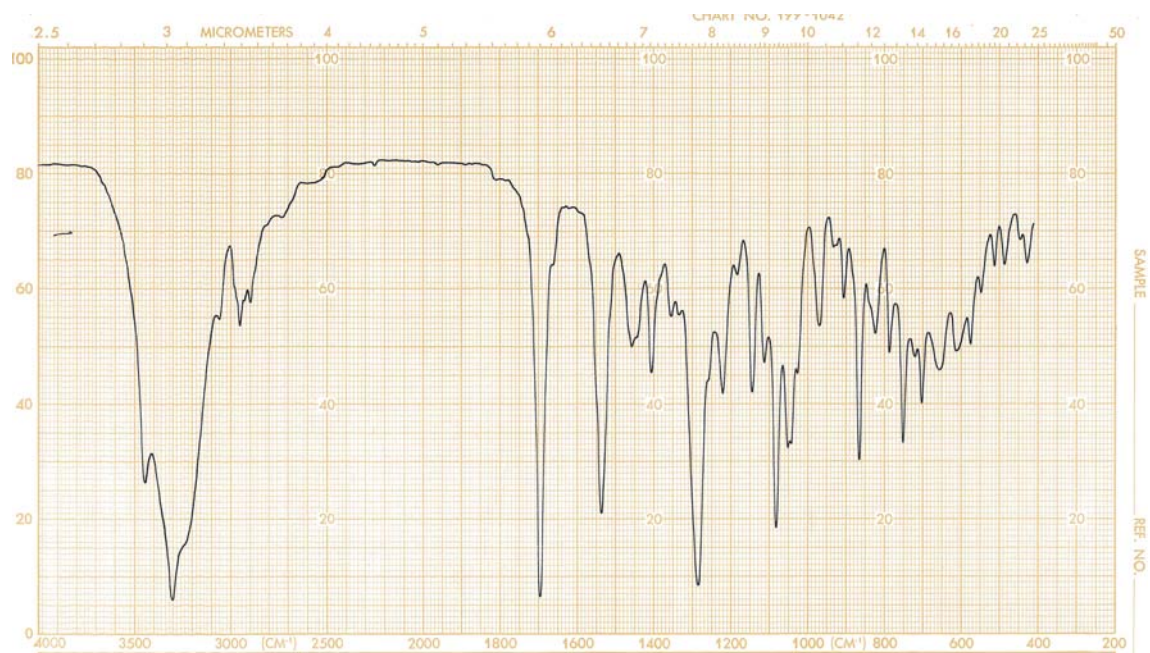

Figure S7. IR spectrum of 26.

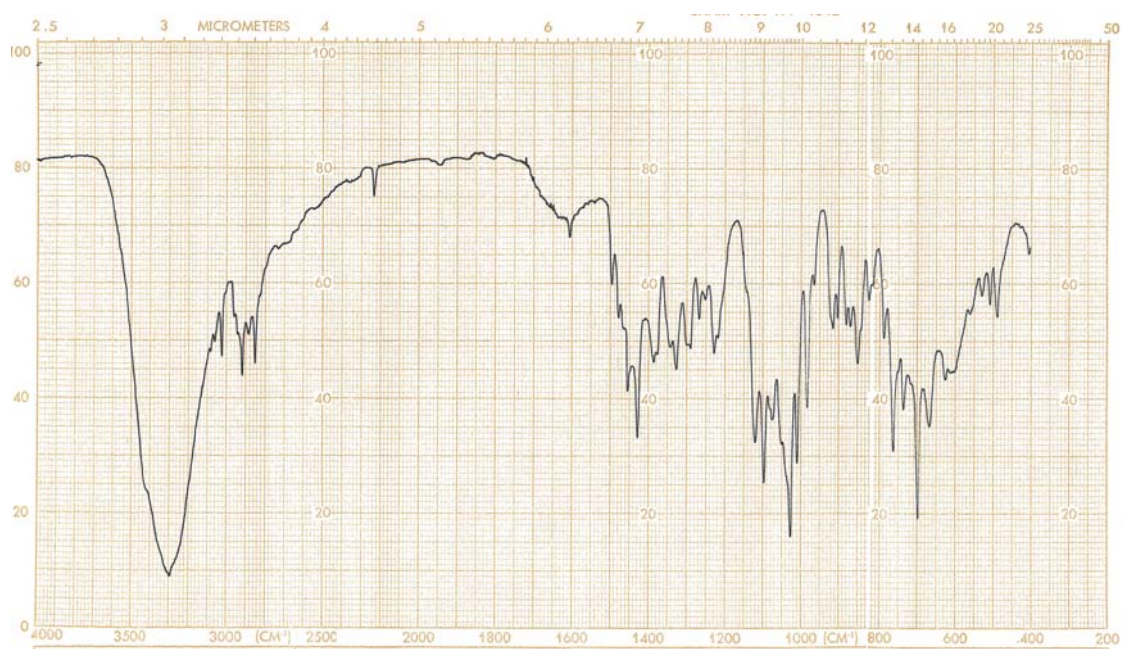

Figure S8. IR spectrum of 32.



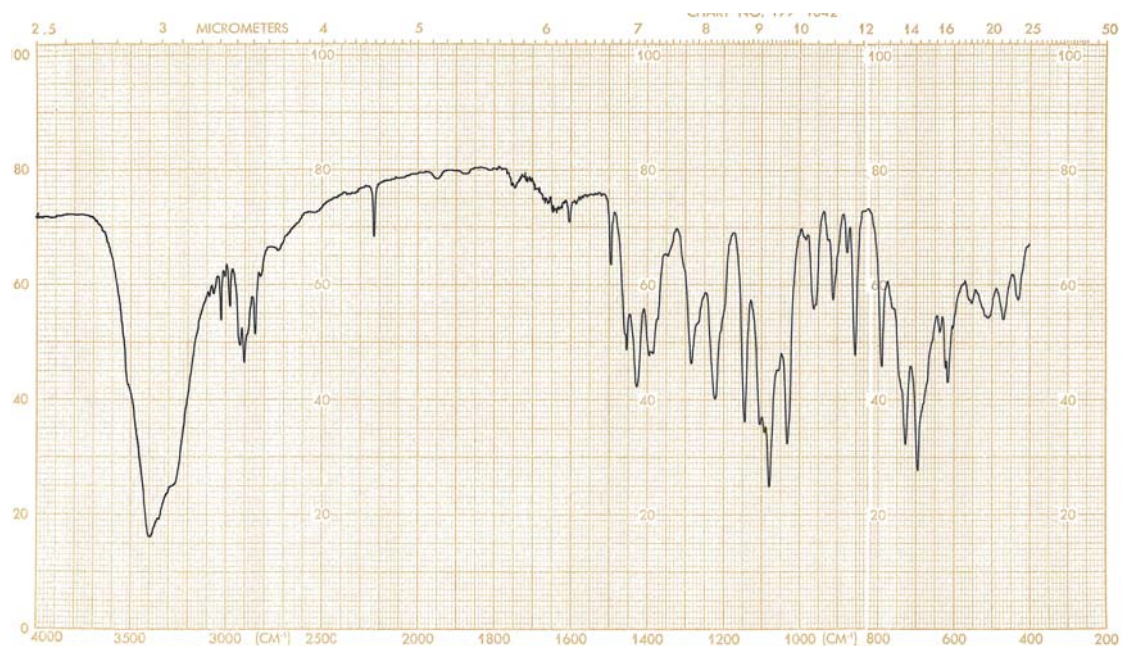

Figure S9. IR spectrum of 33.

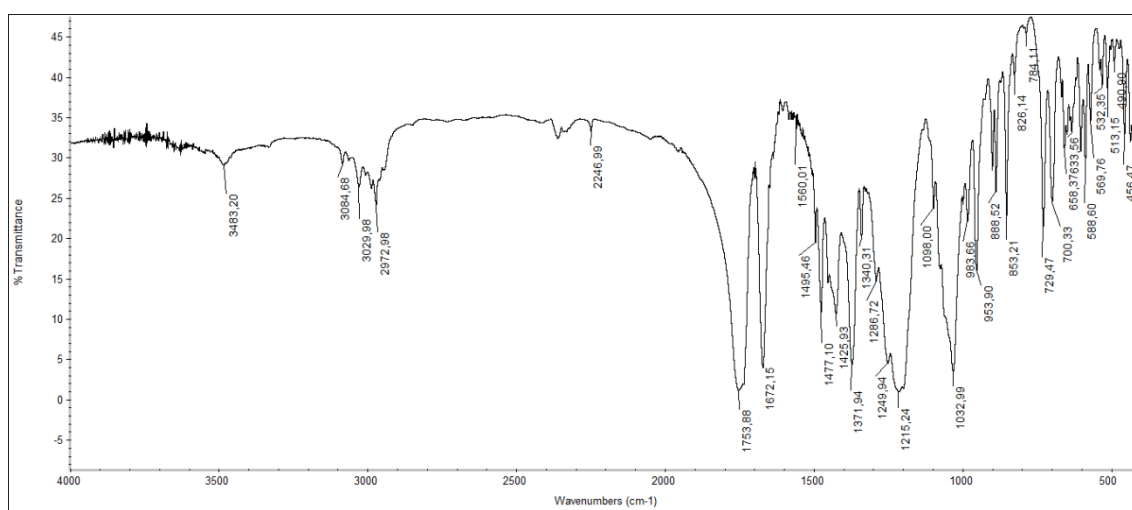

Figure S10. IR spectrum of 37.

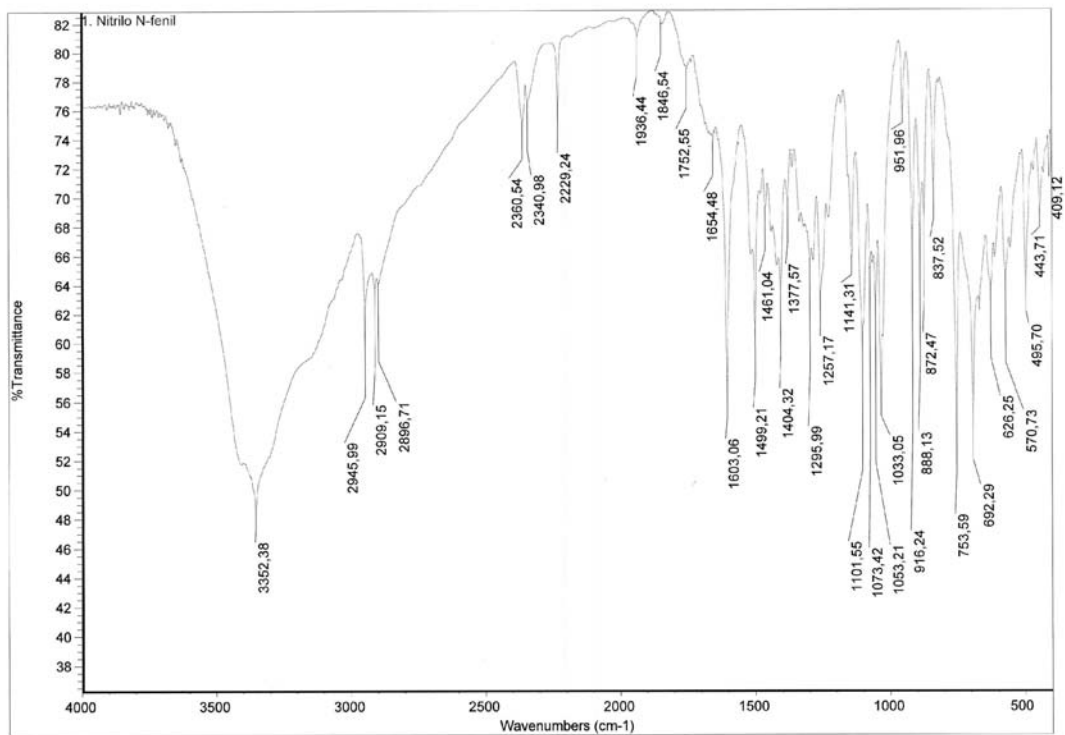

Figure S11. IR spectrum of 41.

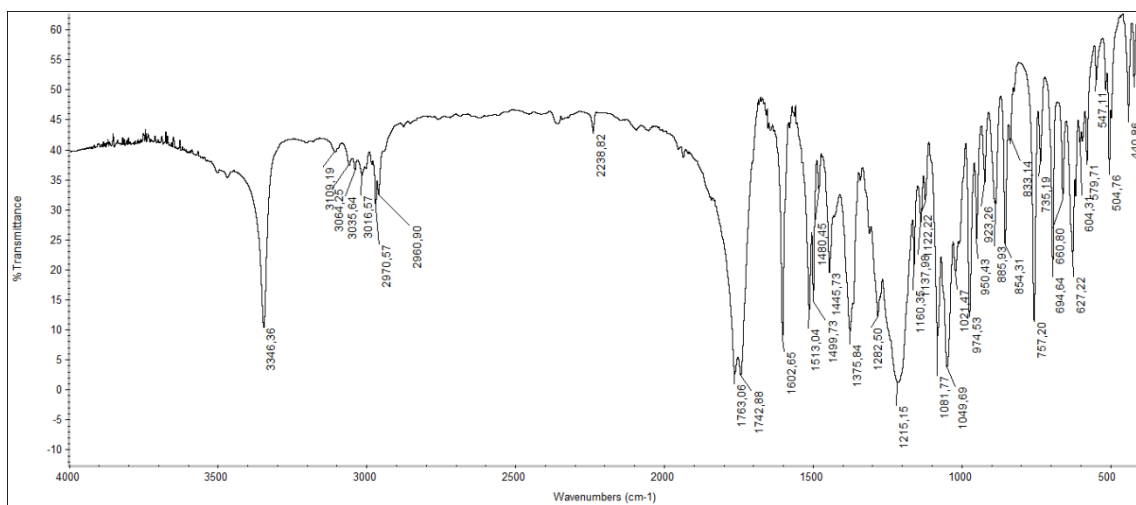

Figure S12. IR spectrum of 42.

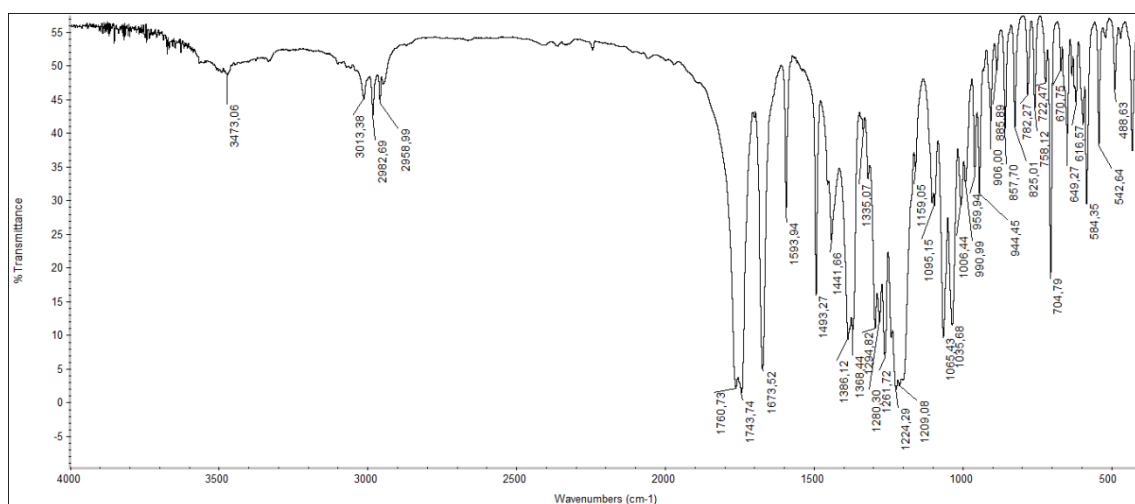

Figure S13. IR spectrum of 43.

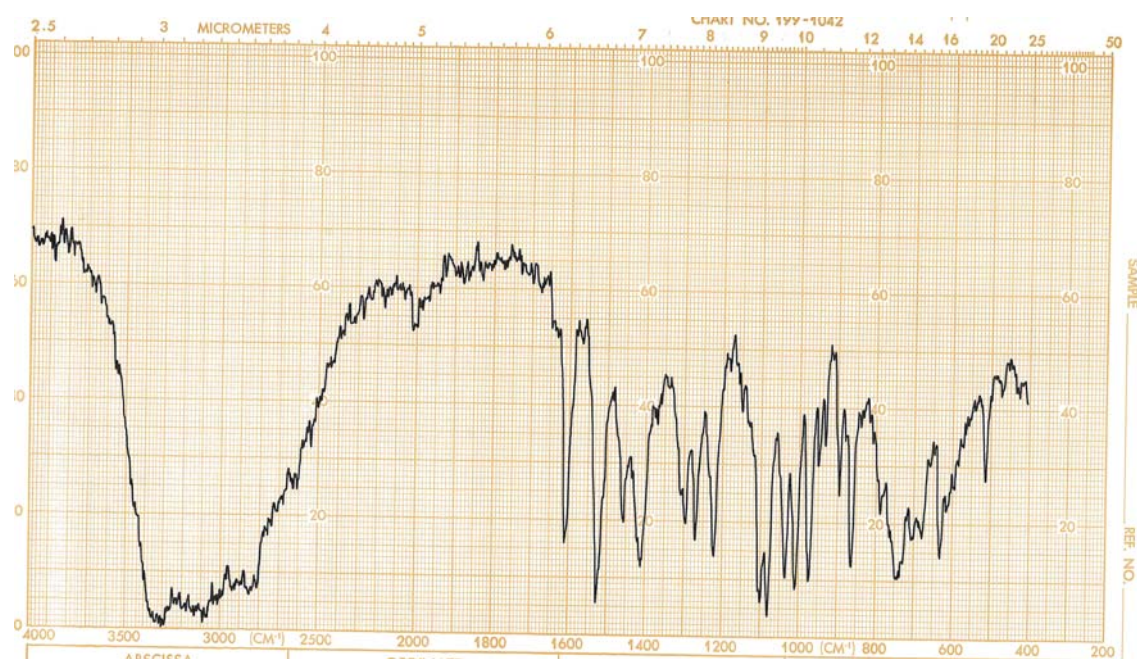

Figure S14. IR spectrum of 45.

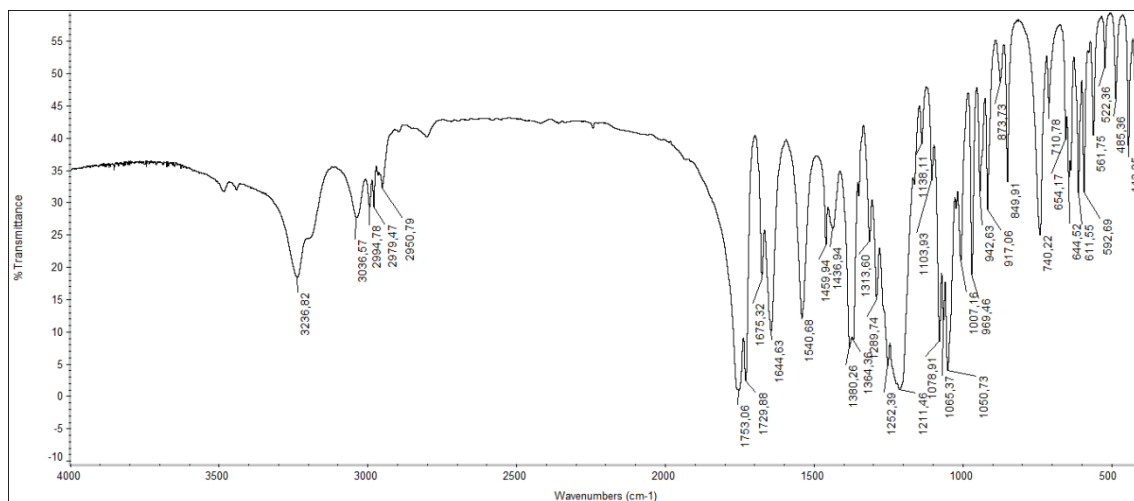

Figure S15. IR spectrum of 47.

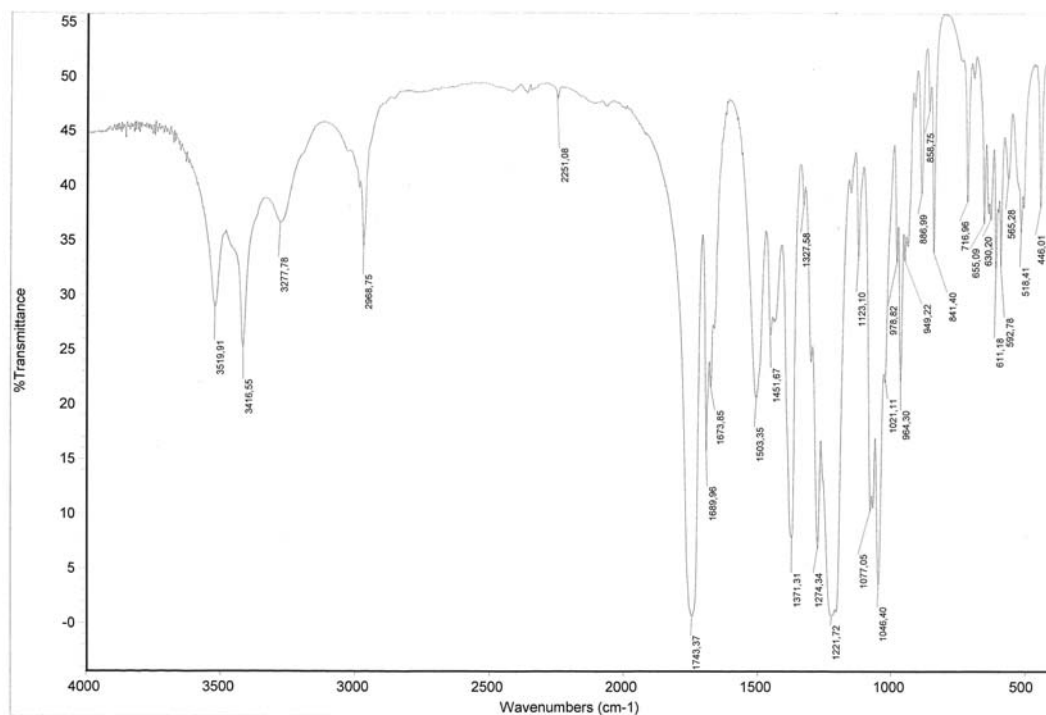

Figure S16. IR spectrum of 51.



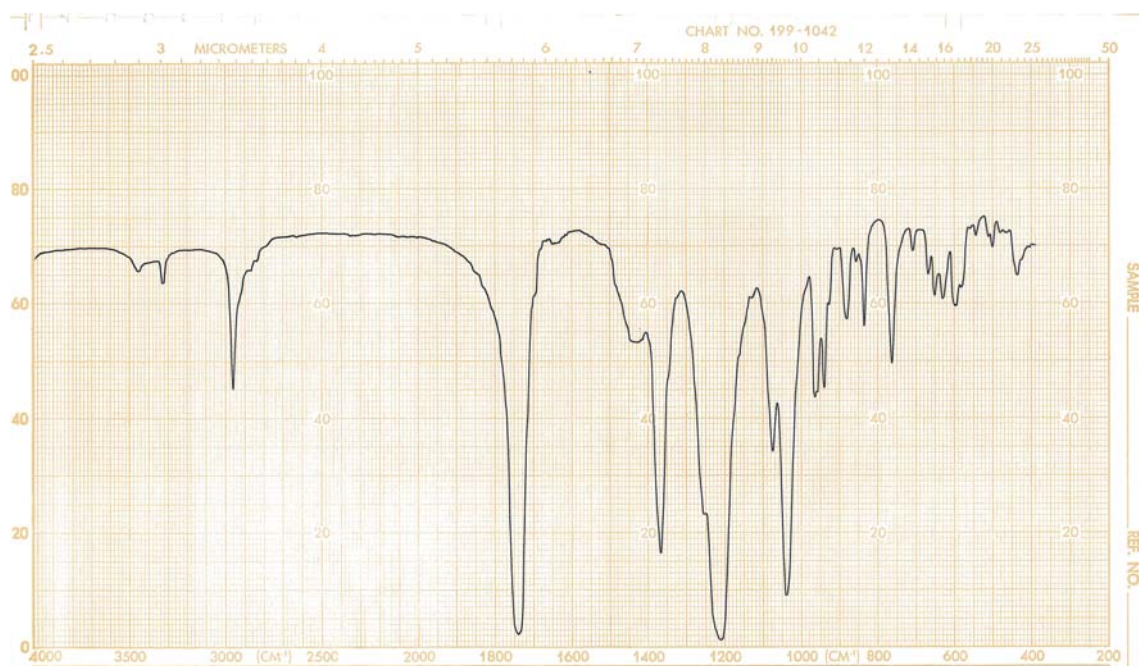

**Figure S17.** IR spectrum of **58**.

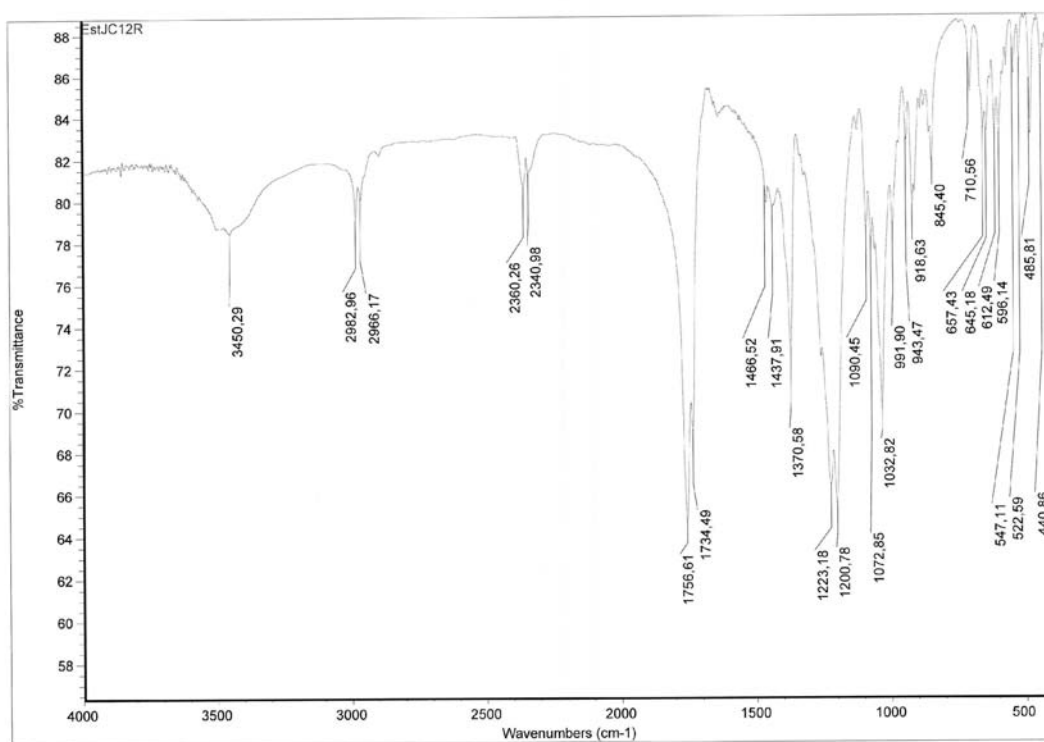

**Figure S18.** IR spectrum of **63**.

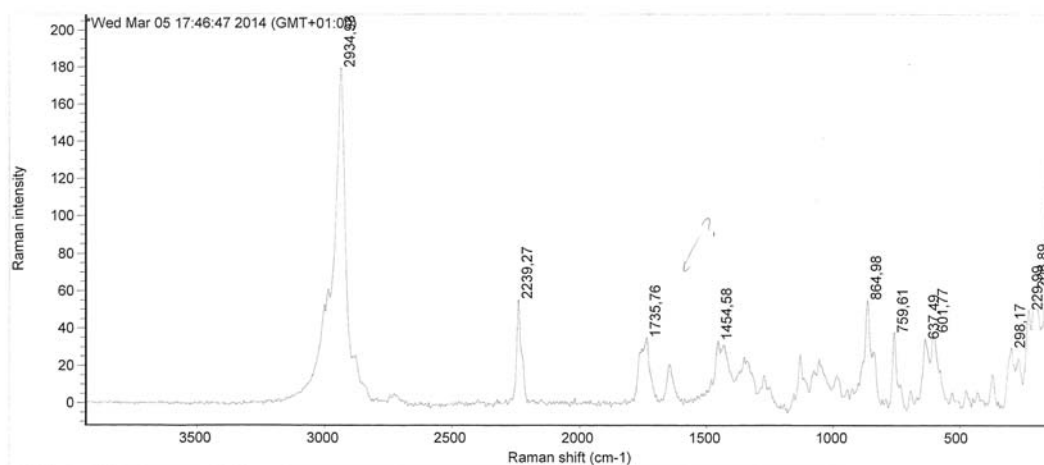

Figure S19. Raman spectrum of 11.

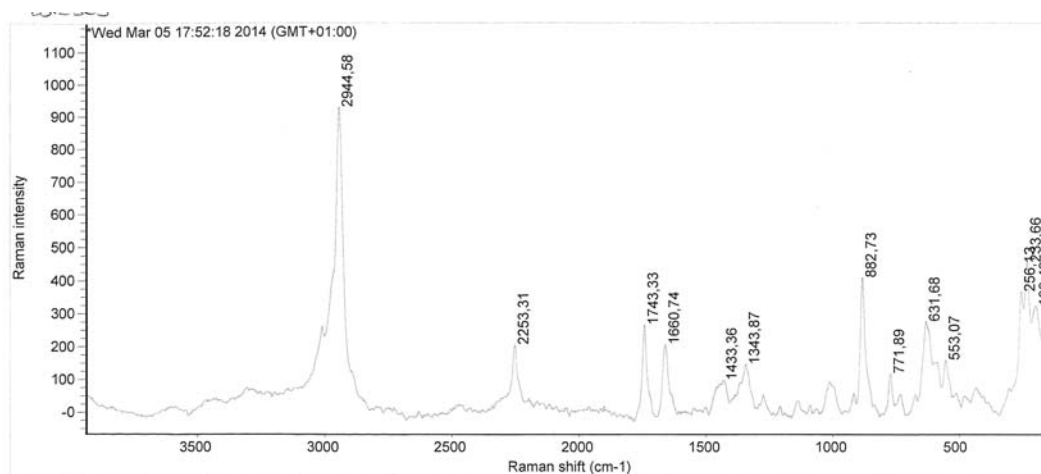

Figure S20. Raman spectrum of 13.

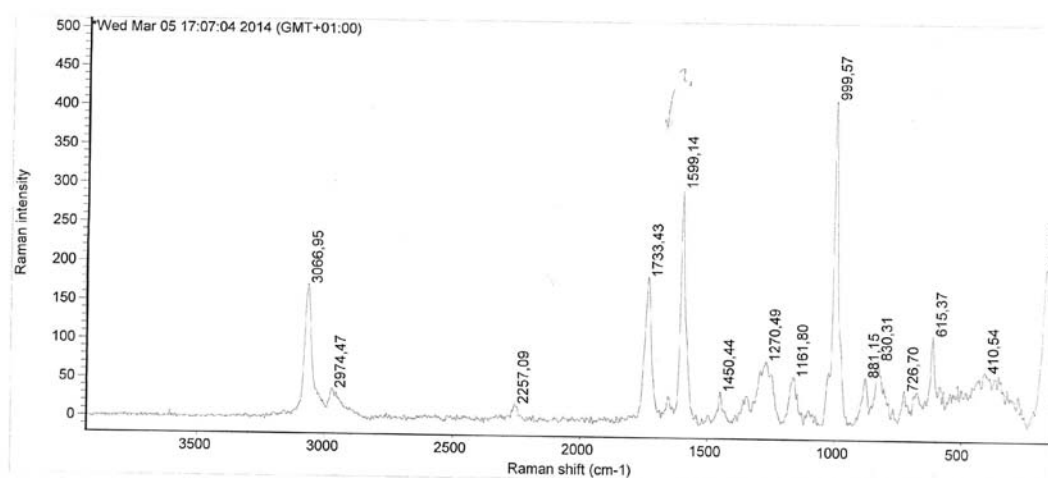

Figure S21. Raman spectrum of 18.

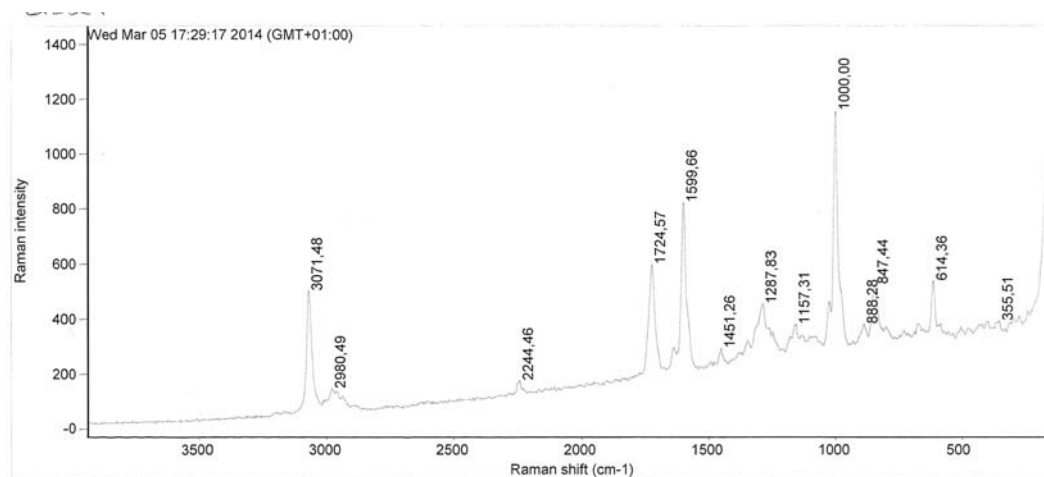

**Figure S22.** Raman spectrum of **20**.

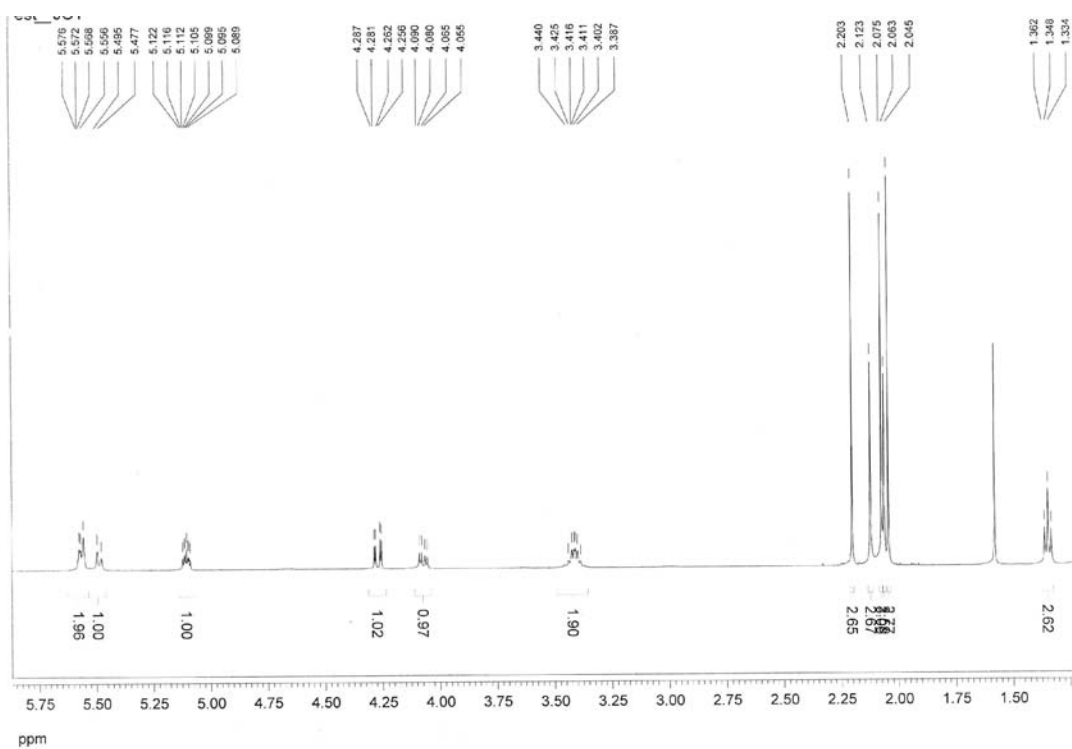

**Figure S23.**  $^1\text{H}$  NMR spectrum of **11** in  $\text{CDCl}_3$ .

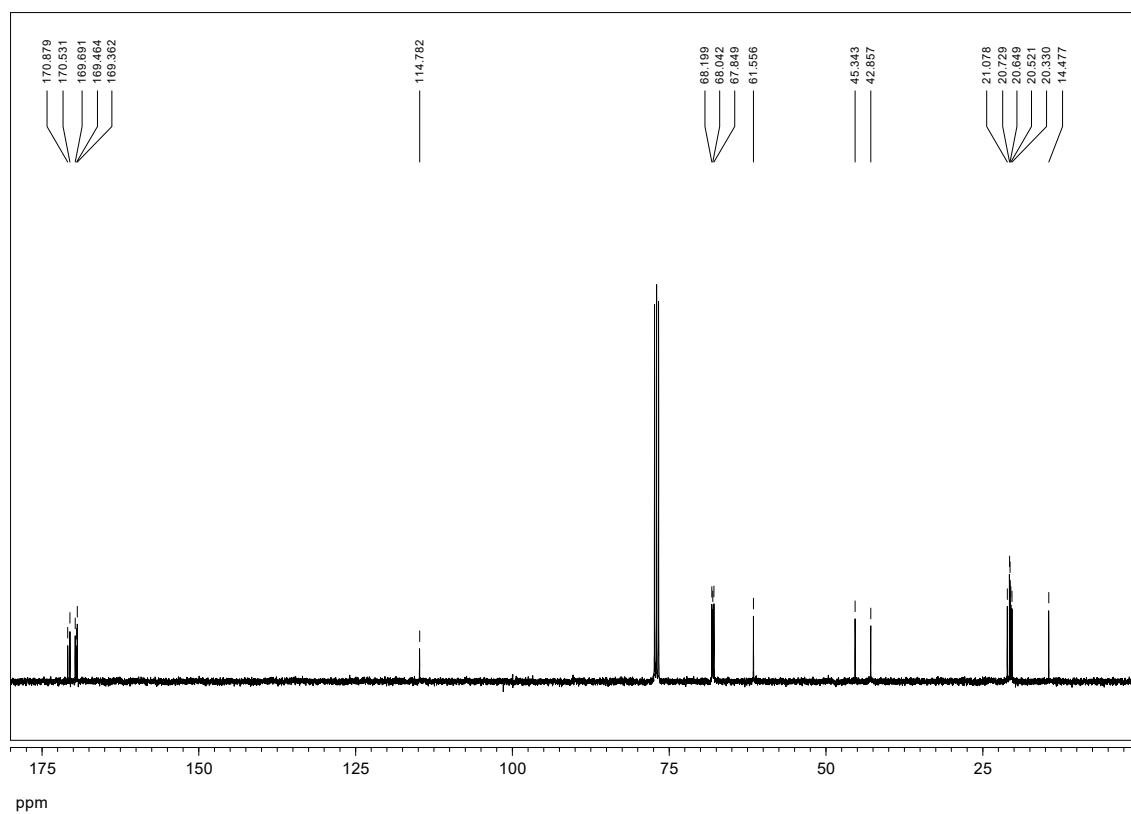

Figure S24.  $^{13}\text{C}\{^1\text{H}\}$  NMR spectrum of **11** in  $\text{CDCl}_3$ .

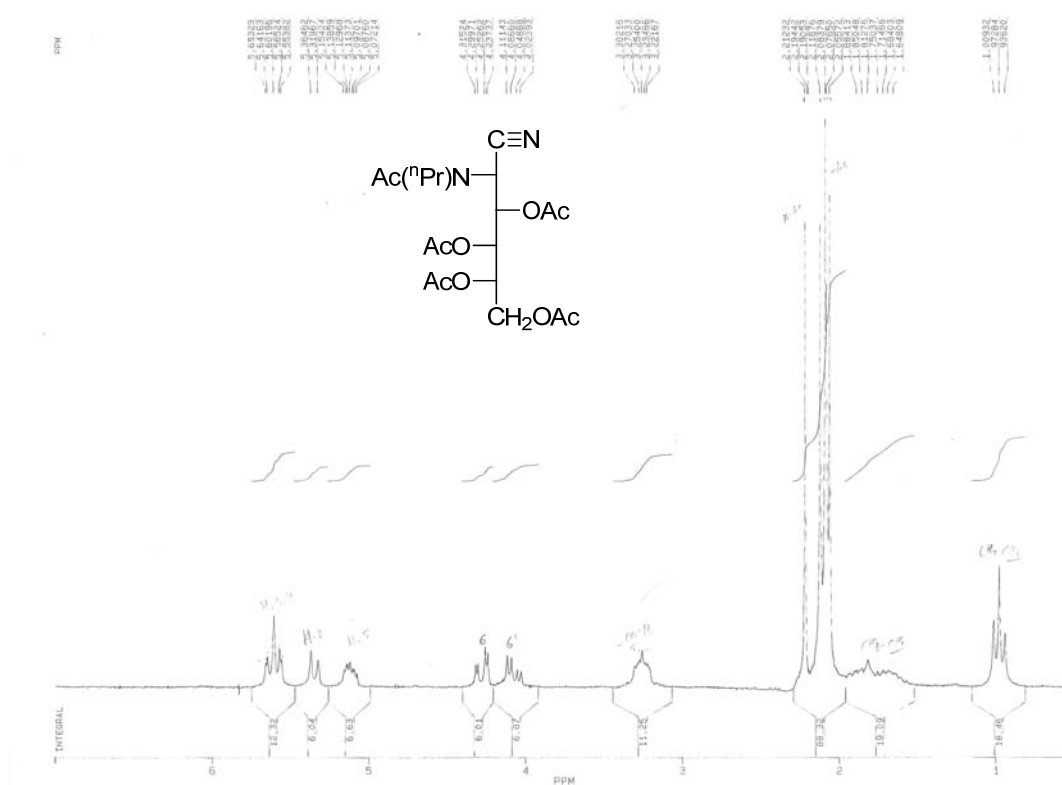

Figure S25.  $^1\text{H}$  NMR spectrum of **12** in  $\text{CDCl}_3$ .

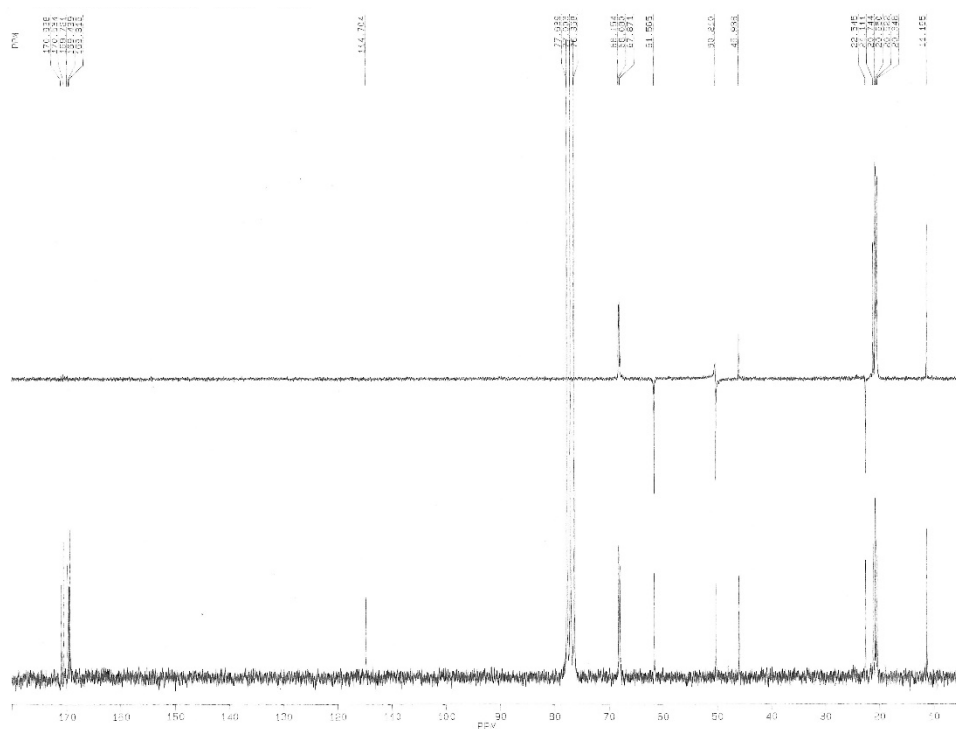

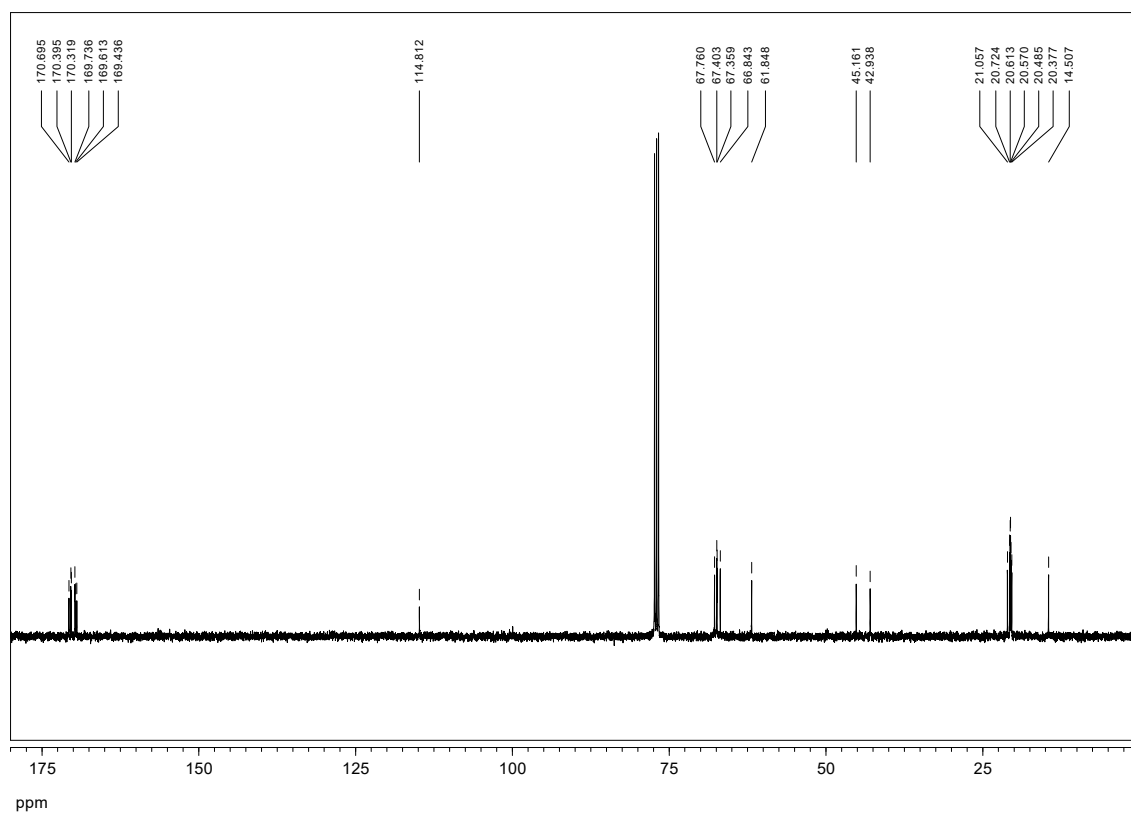

**Figure S28.**  $^{13}\text{C}\{^1\text{H}\}$  NMR spectrum of **13** in  $\text{CDCl}_3$ .

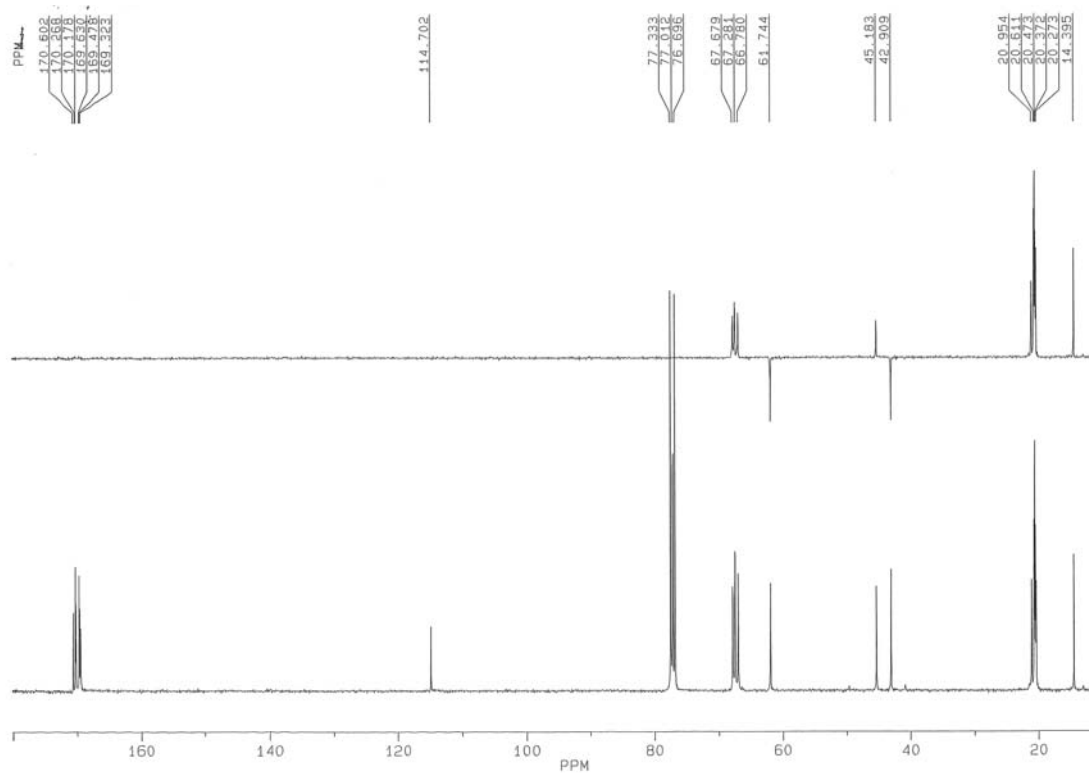

**Figure S29.**  $^{13}\text{C}\{^1\text{H}\}$  NMR and DEPT spectra of **13** in  $\text{CDCl}_3$ .

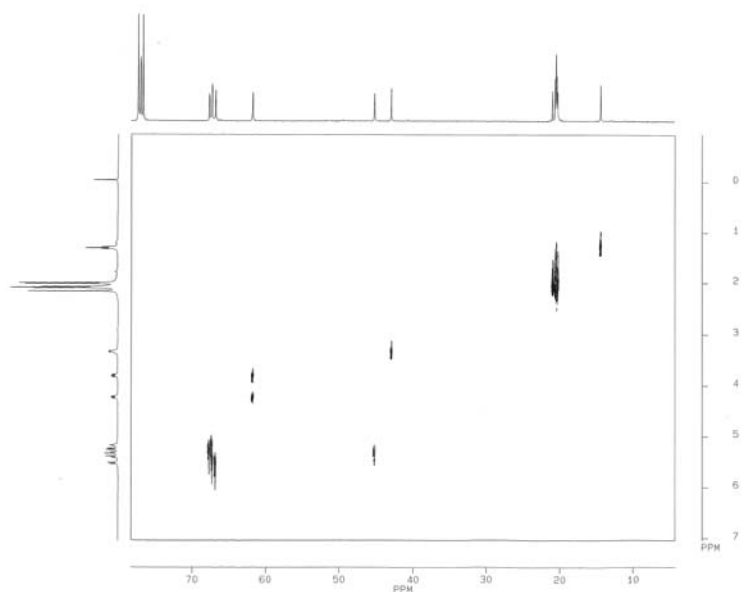

Figure S30. HMQC spectrum of **13** in  $\text{CDCl}_3$ .

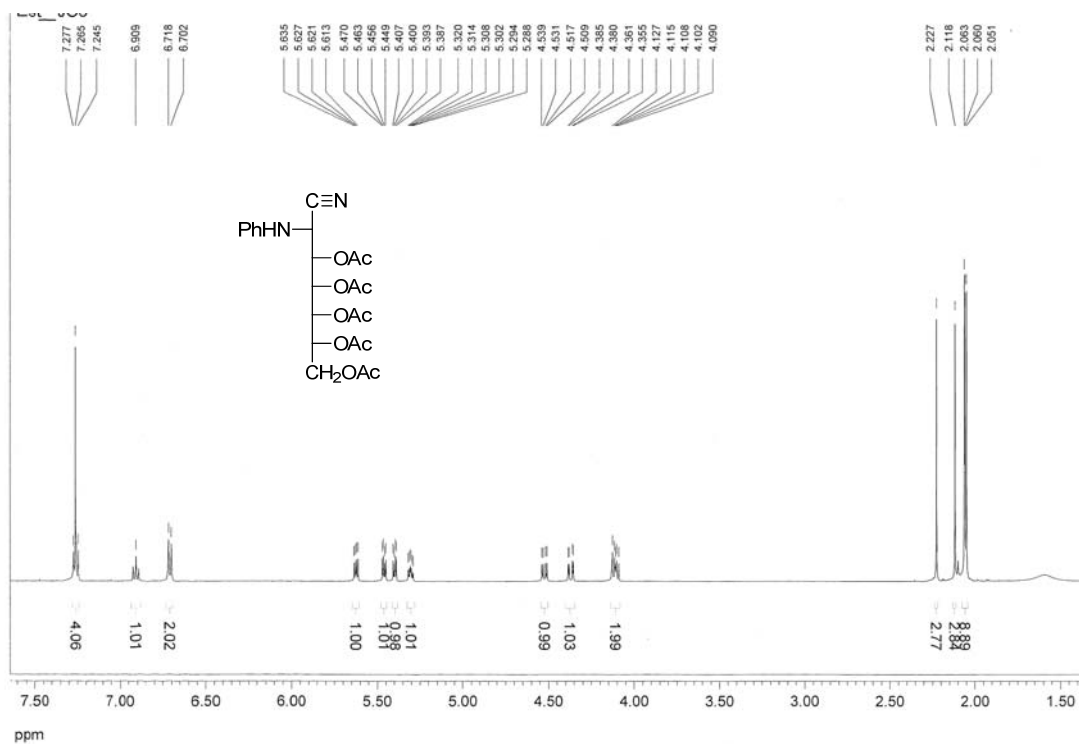

Figure S31.  $^1\text{H}$  NMR spectrum of **17** in  $\text{CDCl}_3$ .

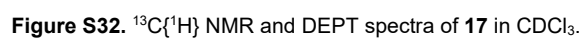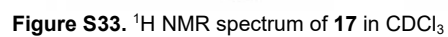





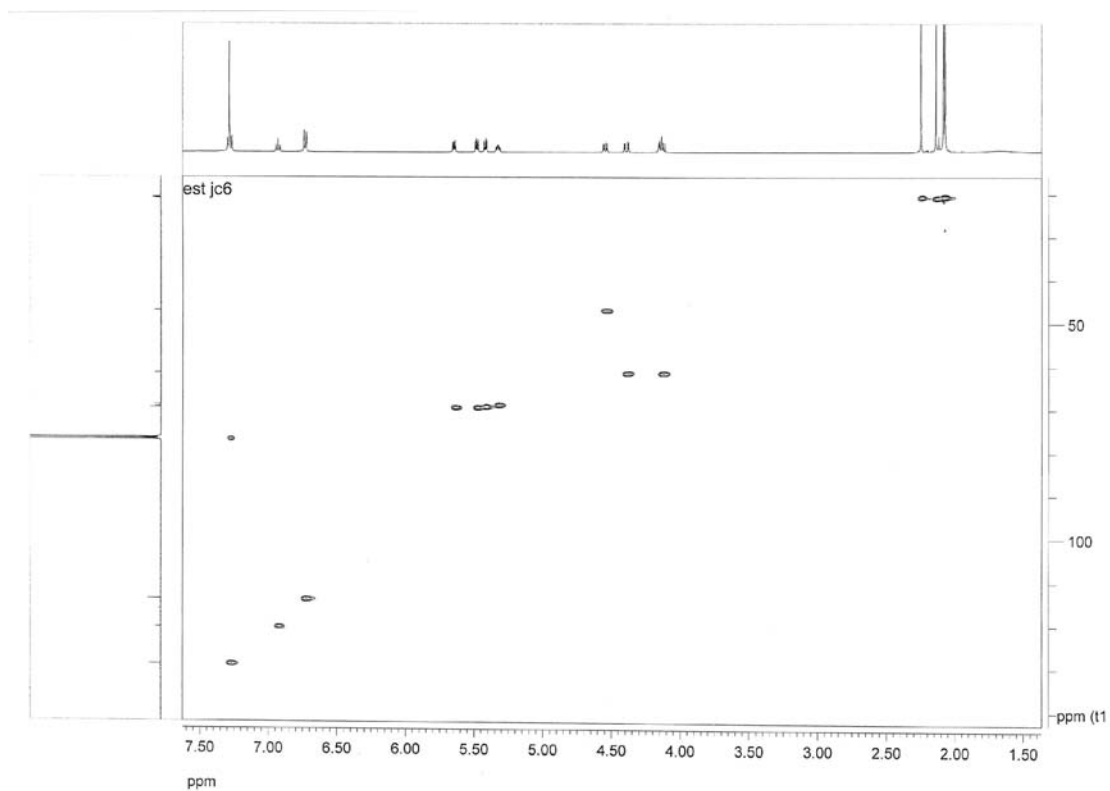

Figure S36. HMQC spectrum of **17** in  $\text{CDCl}_3$

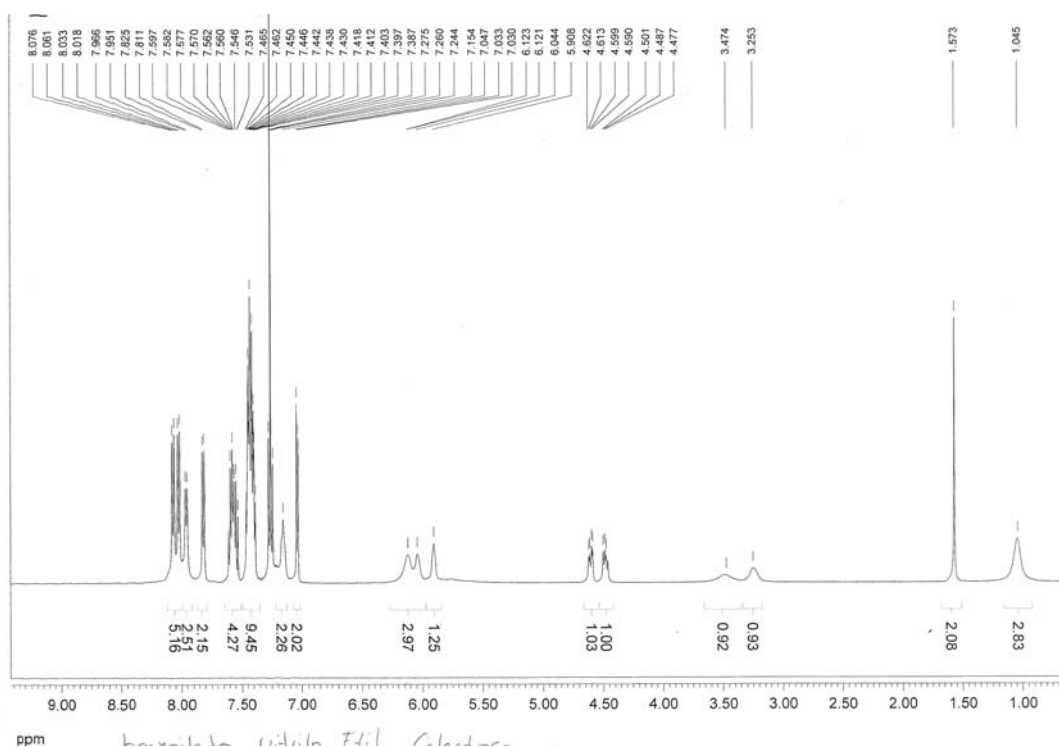

Figure S37.  $^1\text{H}$  NMR spectrum of **18** in  $\text{CDCl}_3$ .

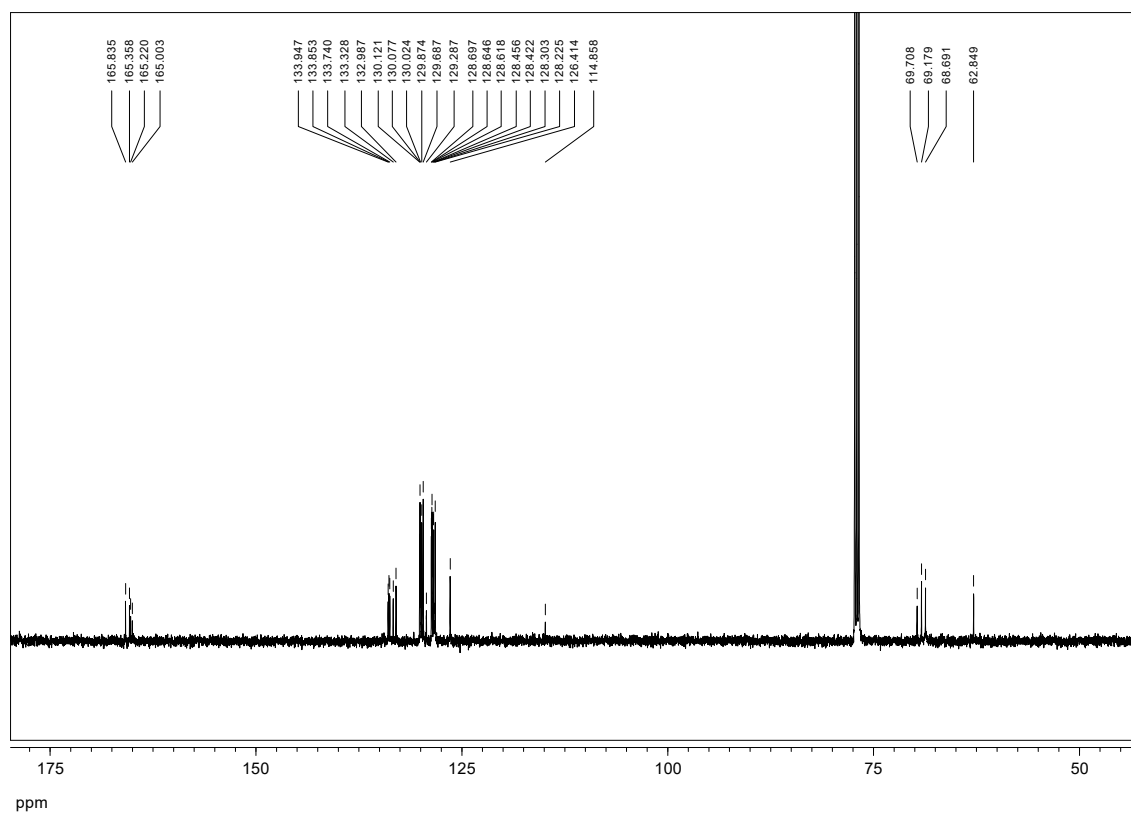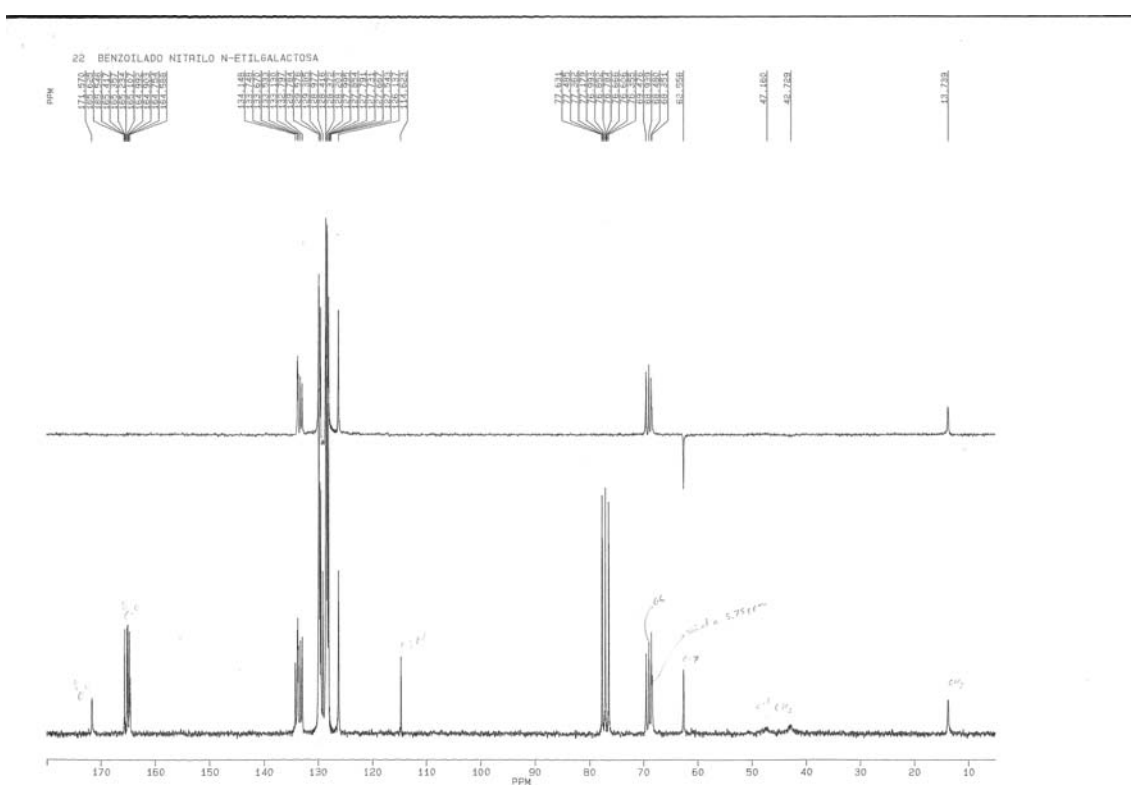

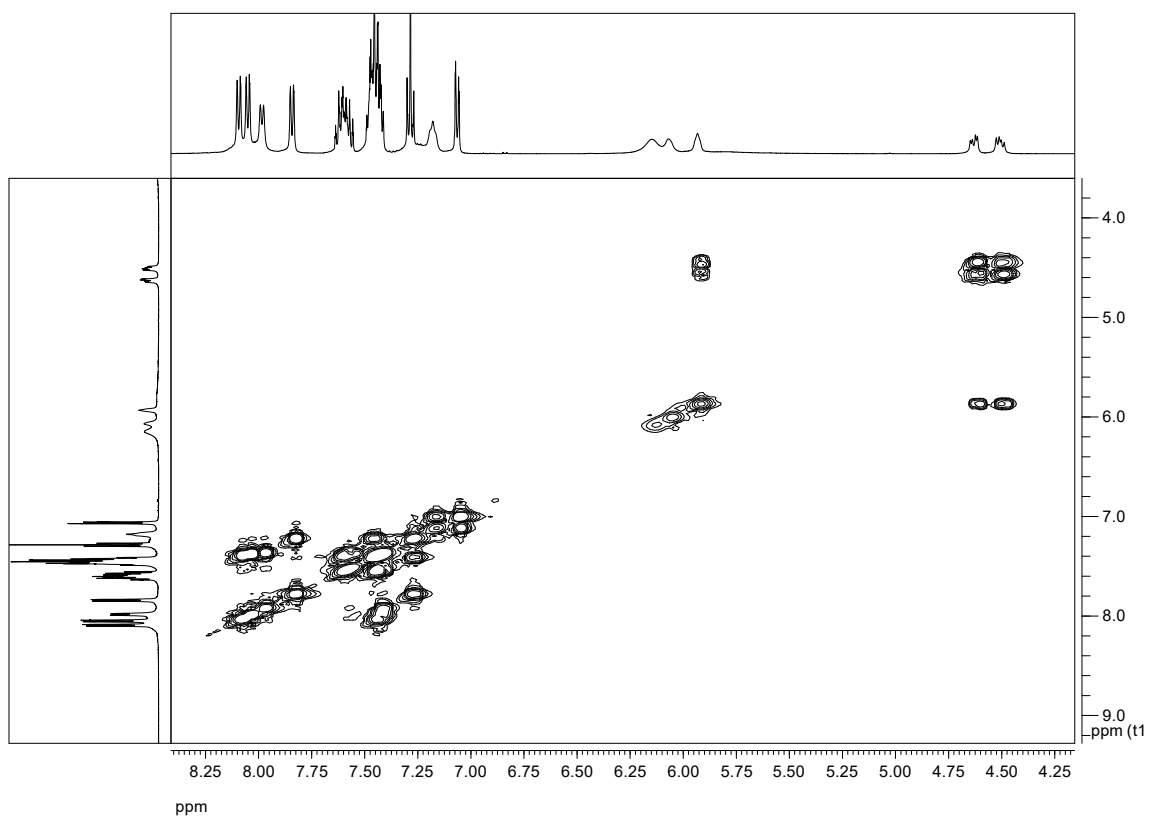

**Figure S40.** COSY spectrum of **18** in  $\text{CDCl}_3$ .

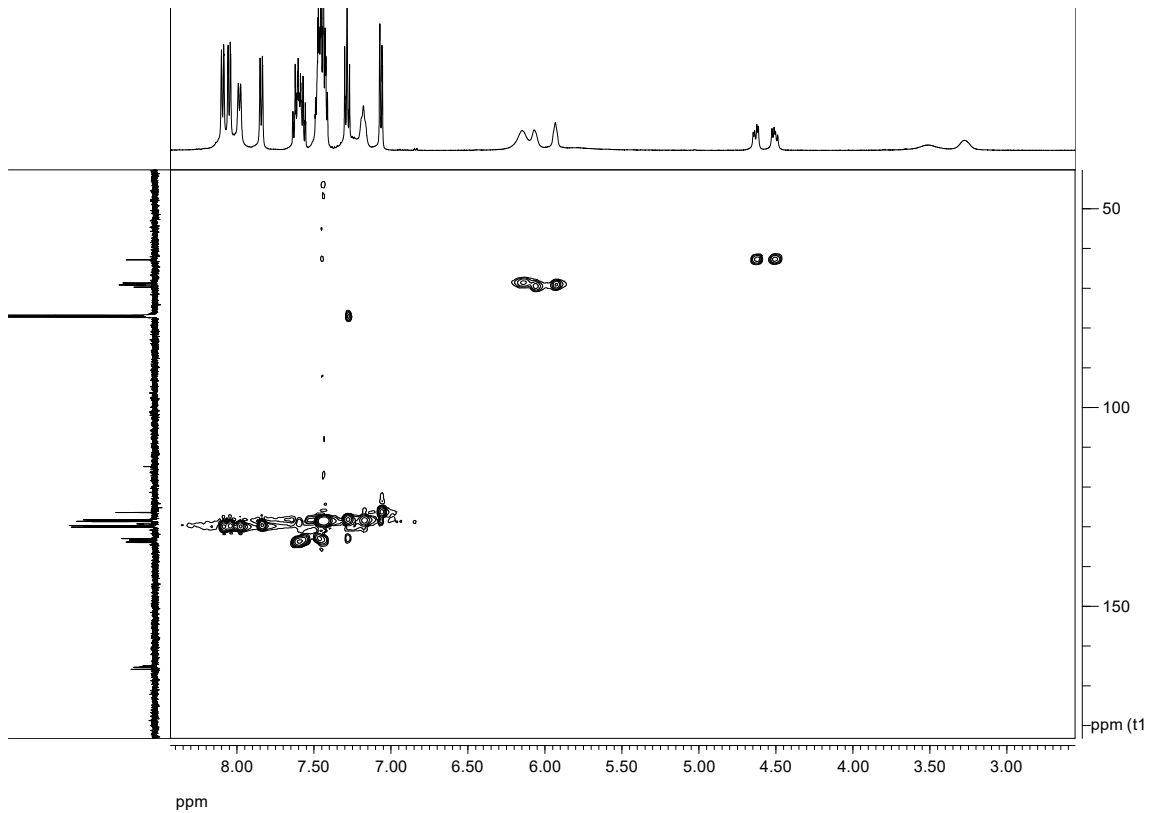

**Figure S41.** HMQC spectrum of **18** in  $\text{CDCl}_3$ .



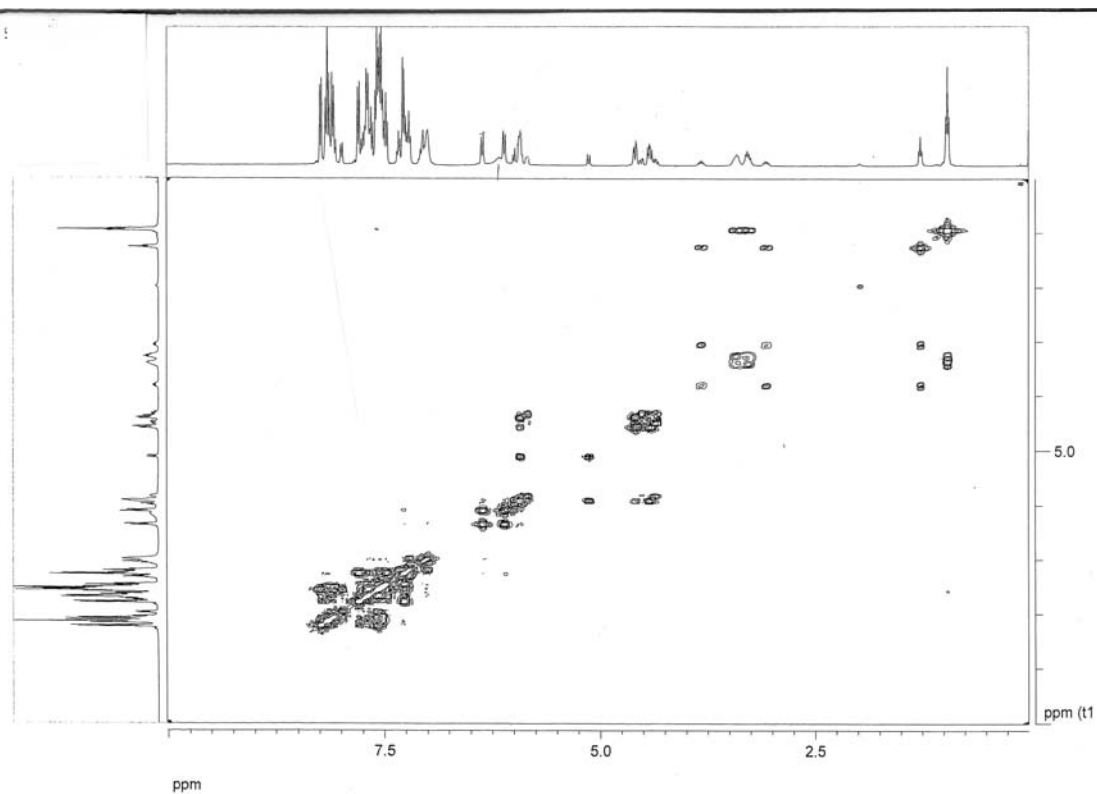

**Figure S44.** COSY spectrum of **18** in  $\text{CDCl}_3$  (240K).

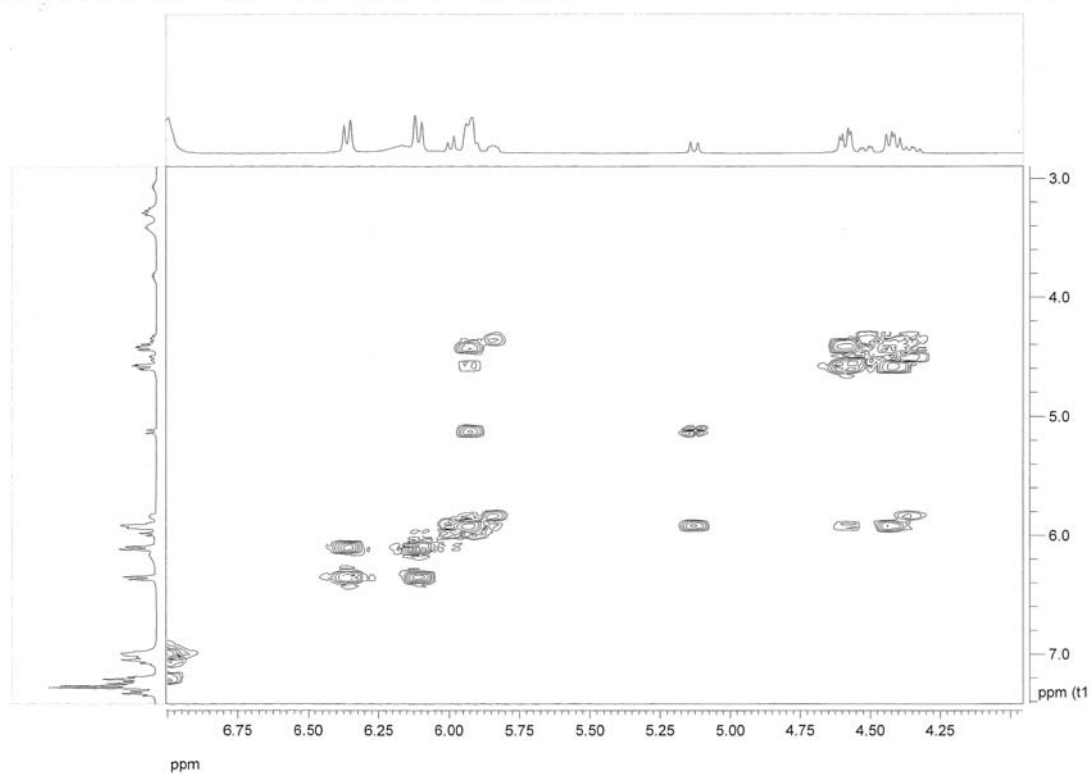

**Figure S45.** Magnified COSY spectral zone of **18** in  $\text{CDCl}_3$  (240K).

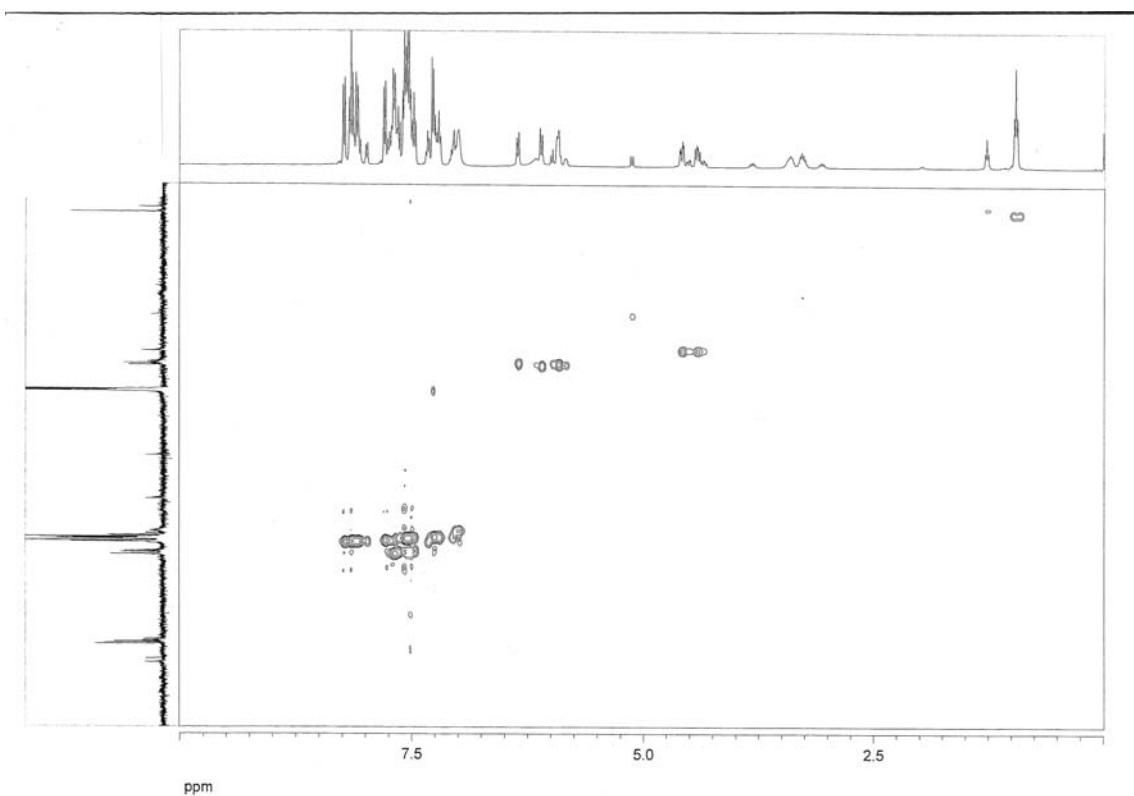

Figure S46. HMQC spectrum of **18** in  $\text{CDCl}_3$  (240K).

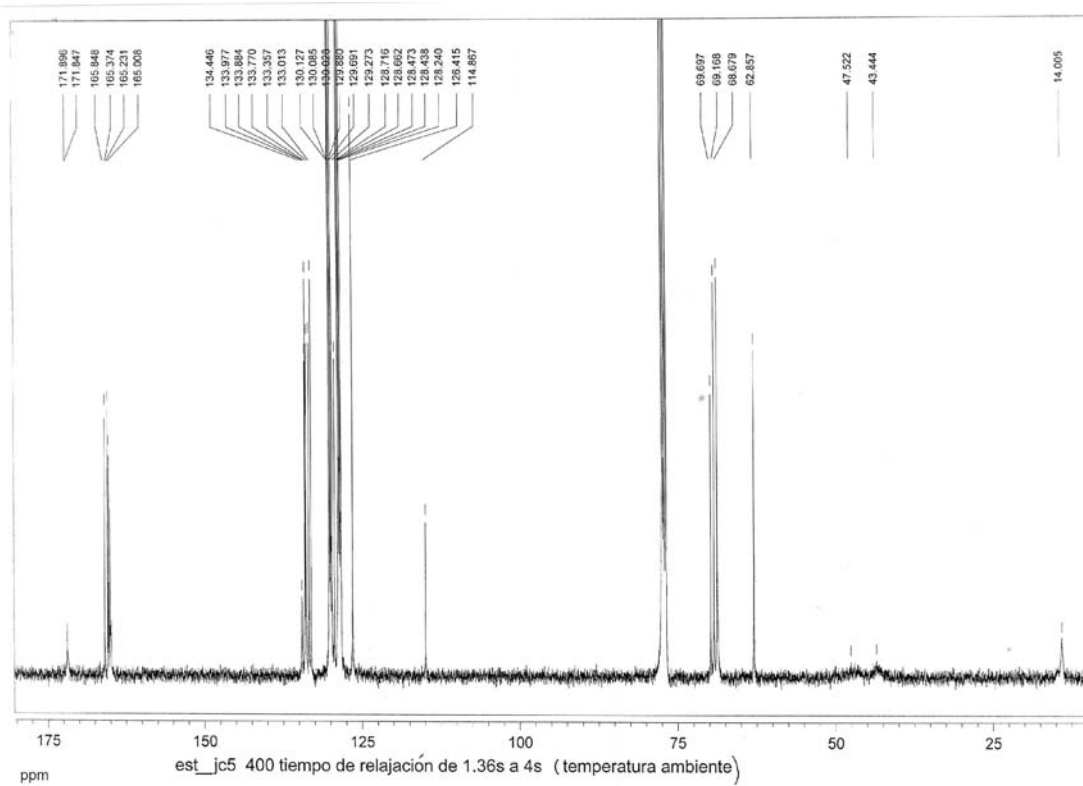

Figure S47.  $^{13}\text{C}\{^1\text{H}\}$  NMR spectrum of **18** in  $\text{CDCl}_3$ .

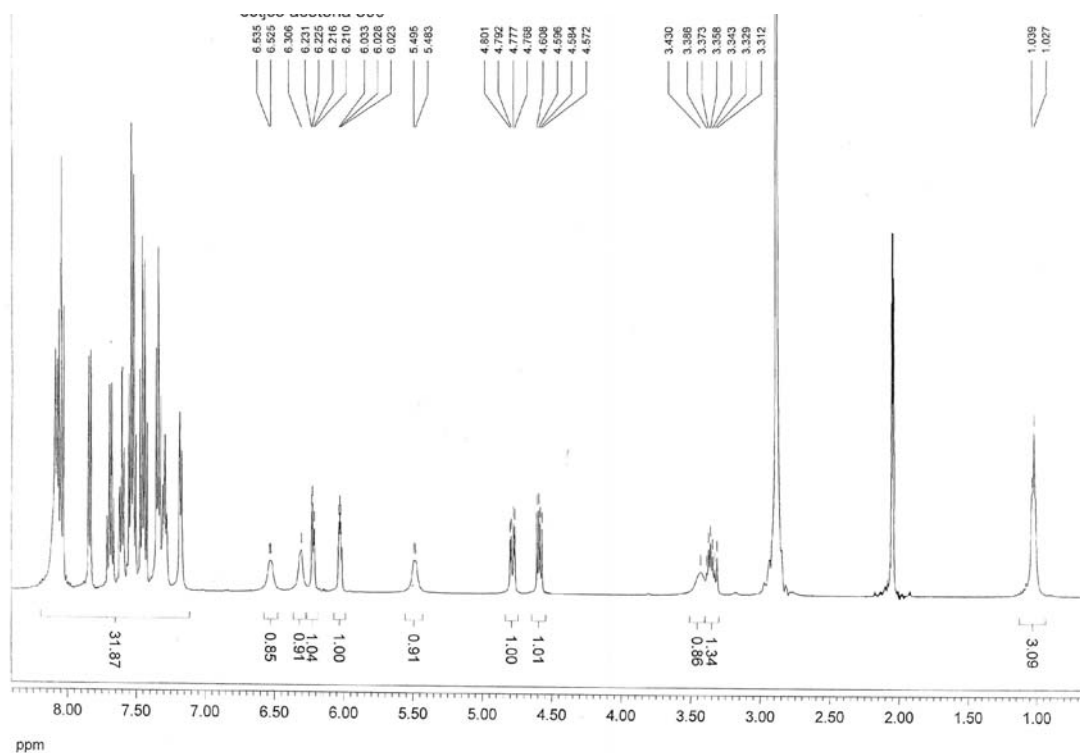

**Figure S48.**  $^1\text{H}$  NMR spectrum of **18** in Acetone- $d_6$ .

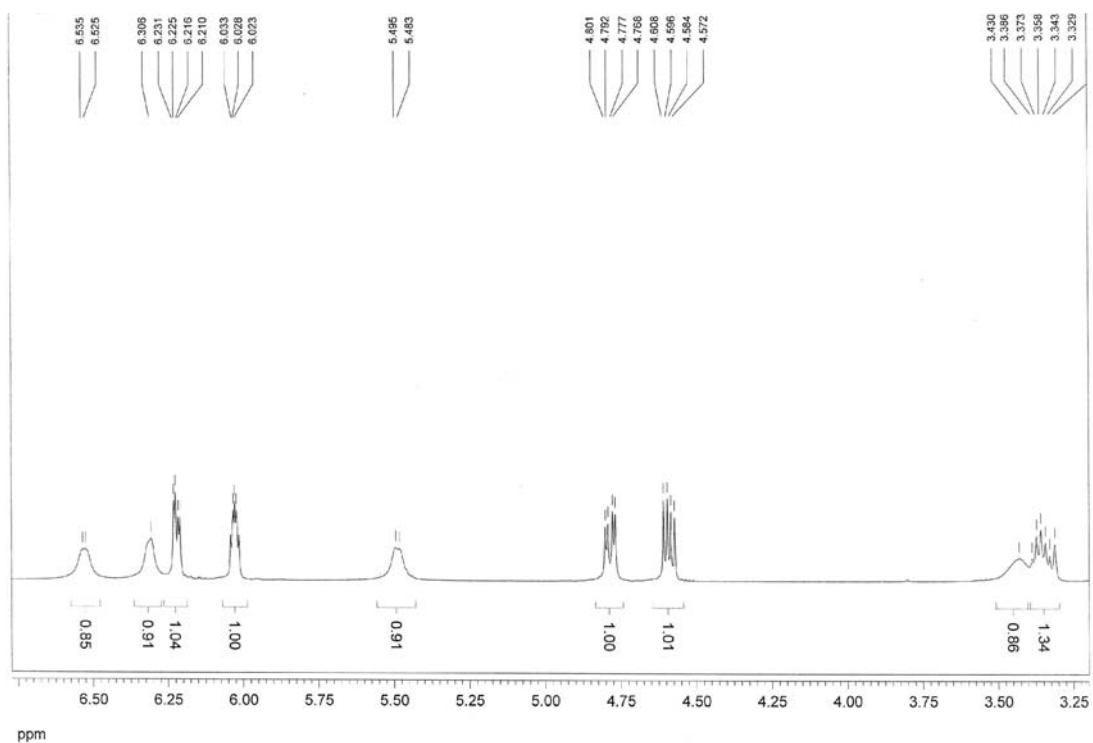

**Figure S49.** Magnified  $^1\text{H}$  NMR spectral zone of **18** in Acetone- $d_6$ .



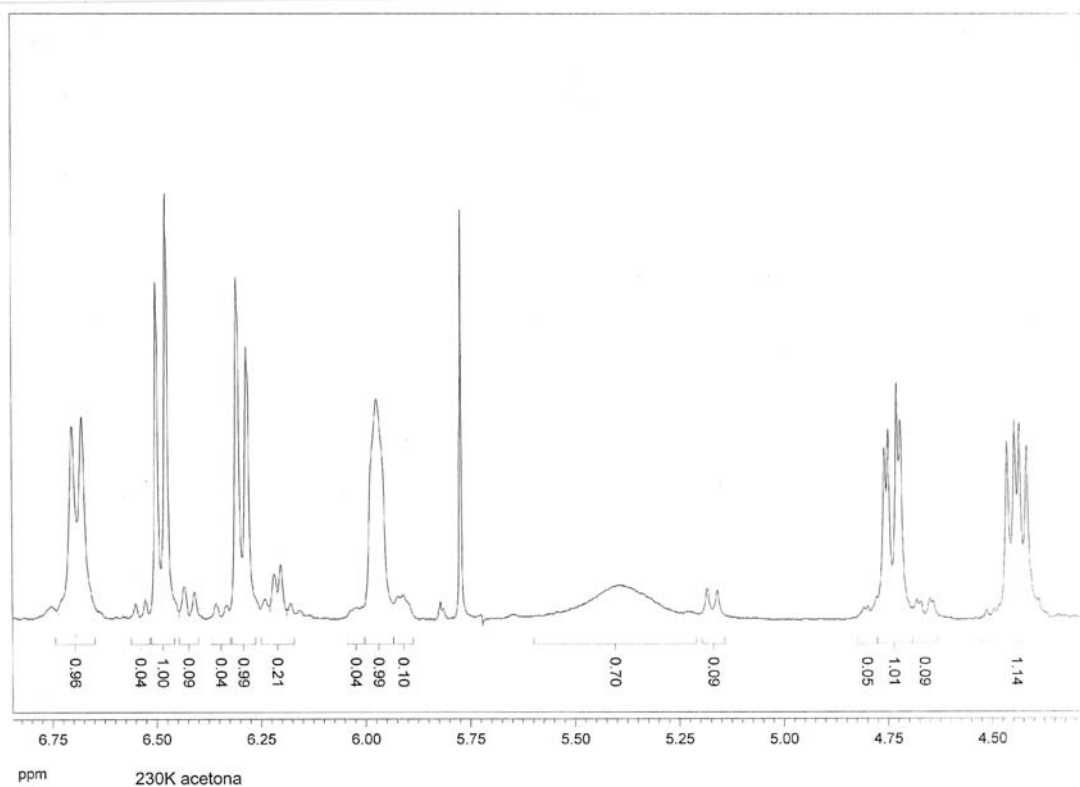

**Figure S50.** Magnified  $^1\text{H}$  NMR spectral zone of **18** in Acetone- $d_6$  (230K).

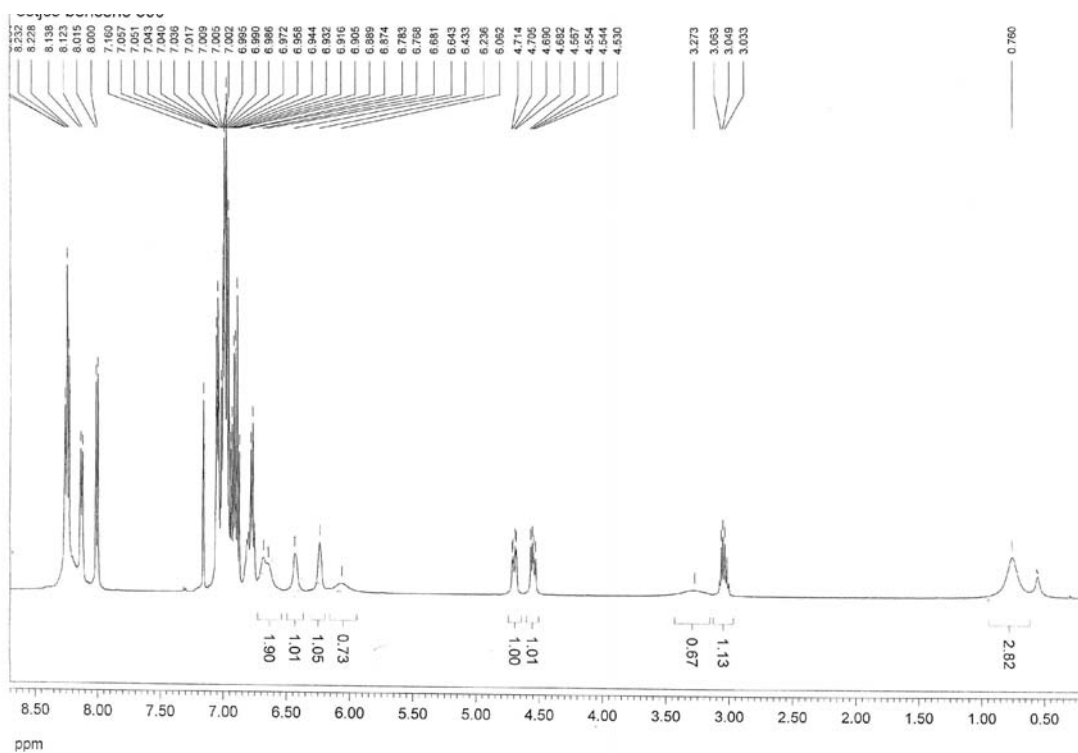

**Figure S51.**  $^1\text{H}$  NMR spectrum of **18** in Benzene- $d_6$ .

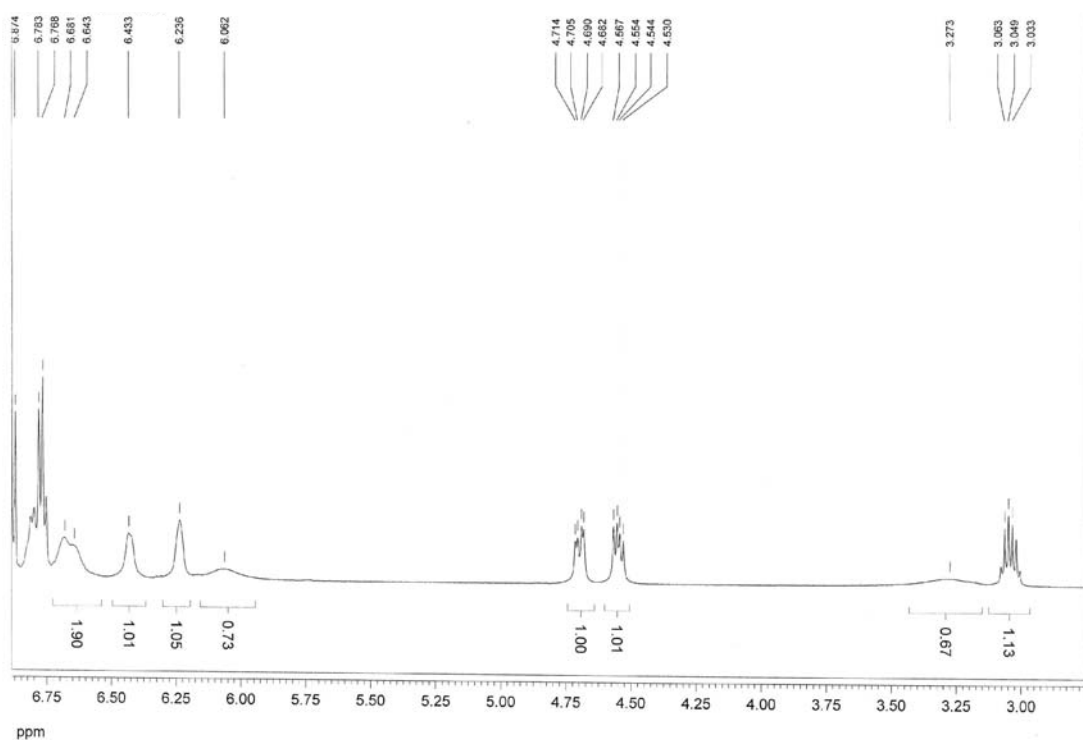

Figure S52. Magnified <sup>1</sup>H NMR spectral zone of **18** in Benzene-*d*<sub>6</sub>.

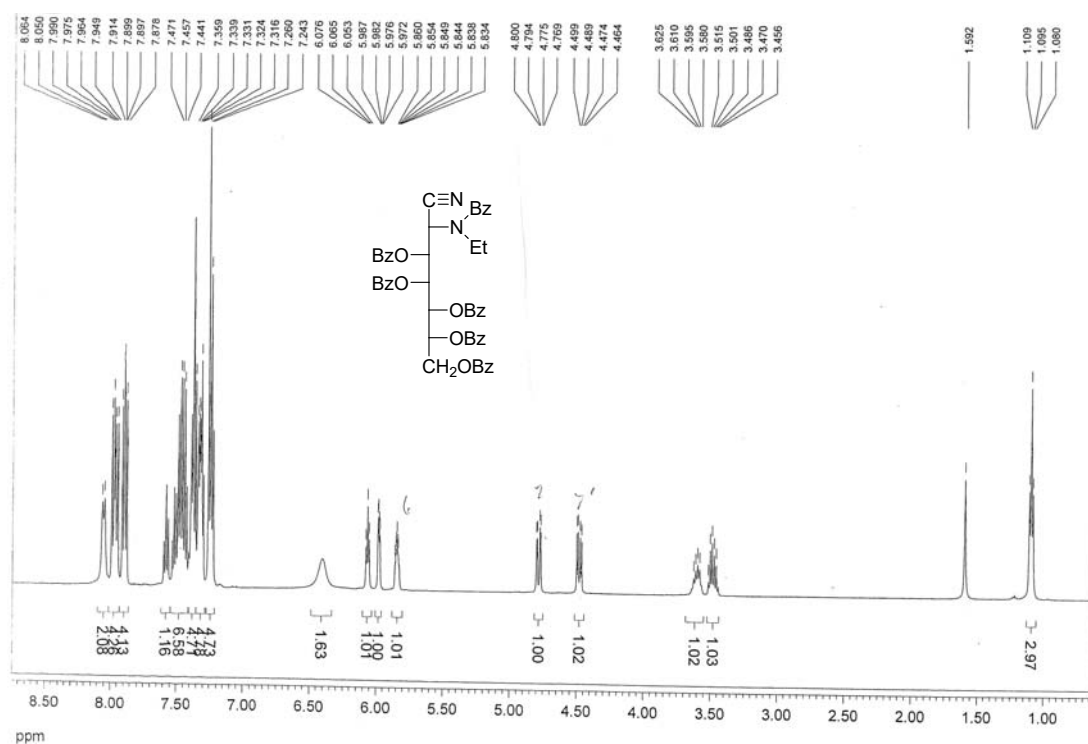

Figure S53. <sup>1</sup>H NMR spectrum of **20** in CDCl<sub>3</sub>.

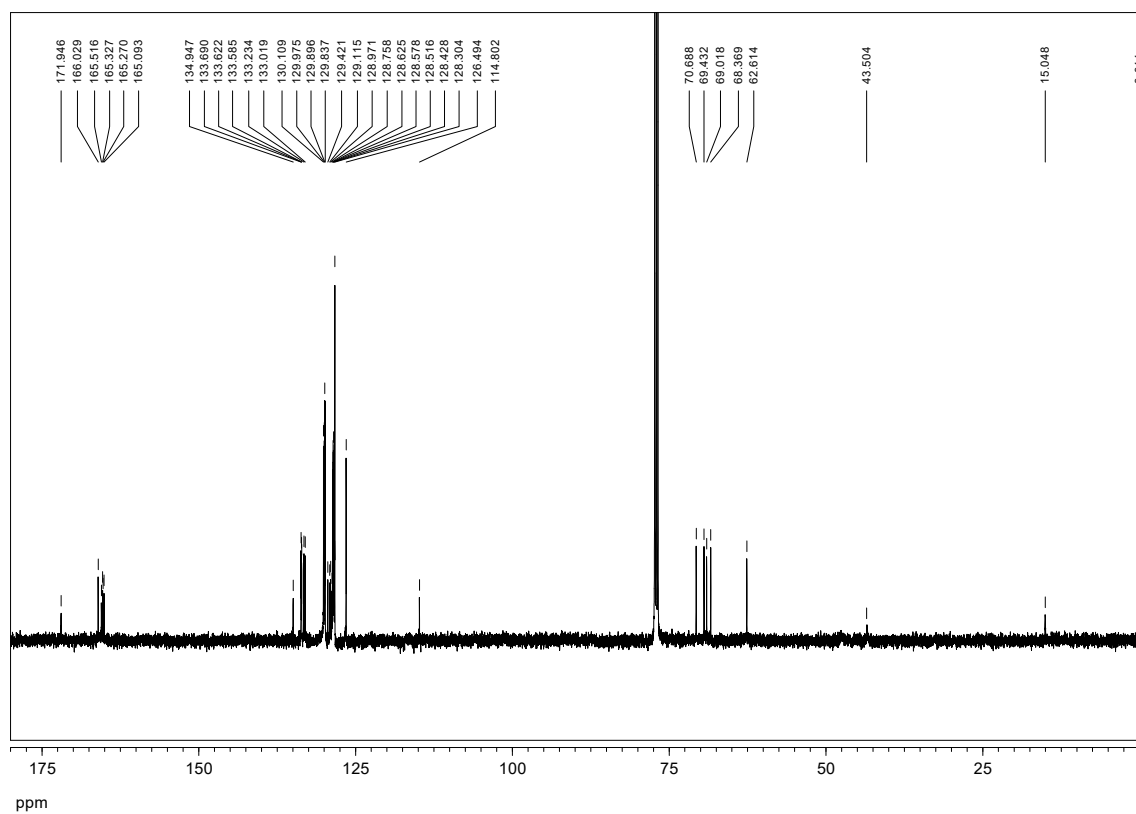

**Figure S54.**  $^{13}\text{C}\{^1\text{H}\}$  NMR spectrum of **20** in  $\text{CDCl}_3$ .

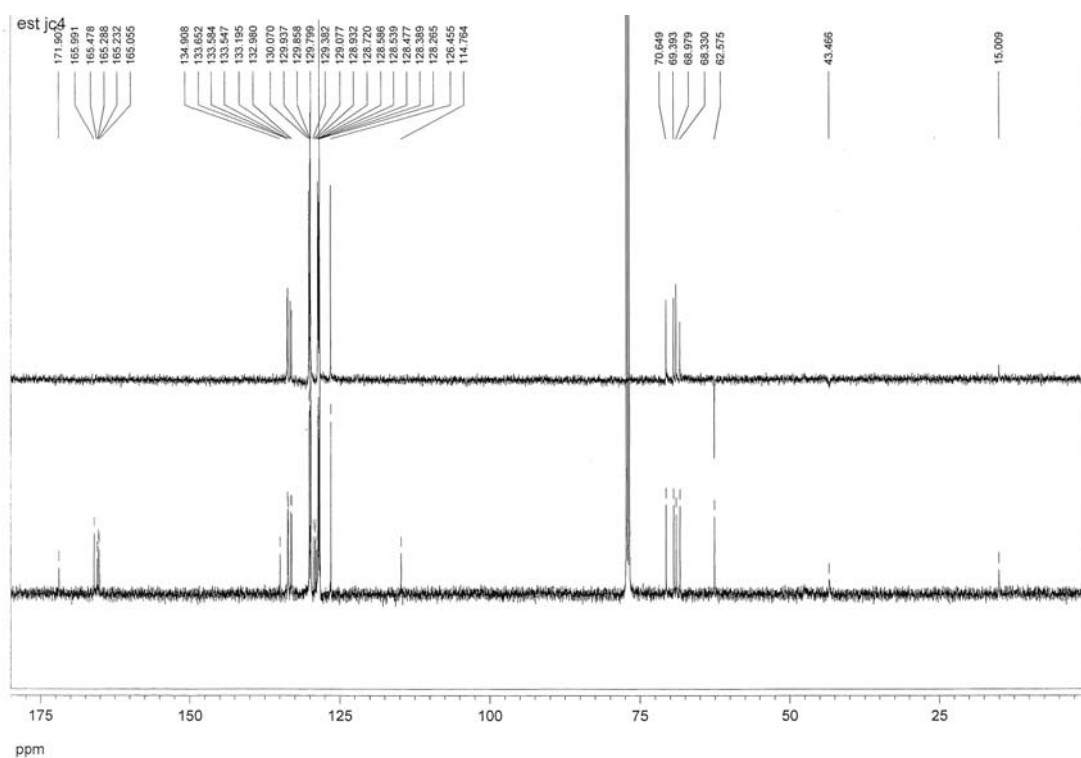

**Figure S55.**  $^{13}\text{C}\{^1\text{H}\}$  NMR and DEPT spectra of **20** in  $\text{CDCl}_3$ .

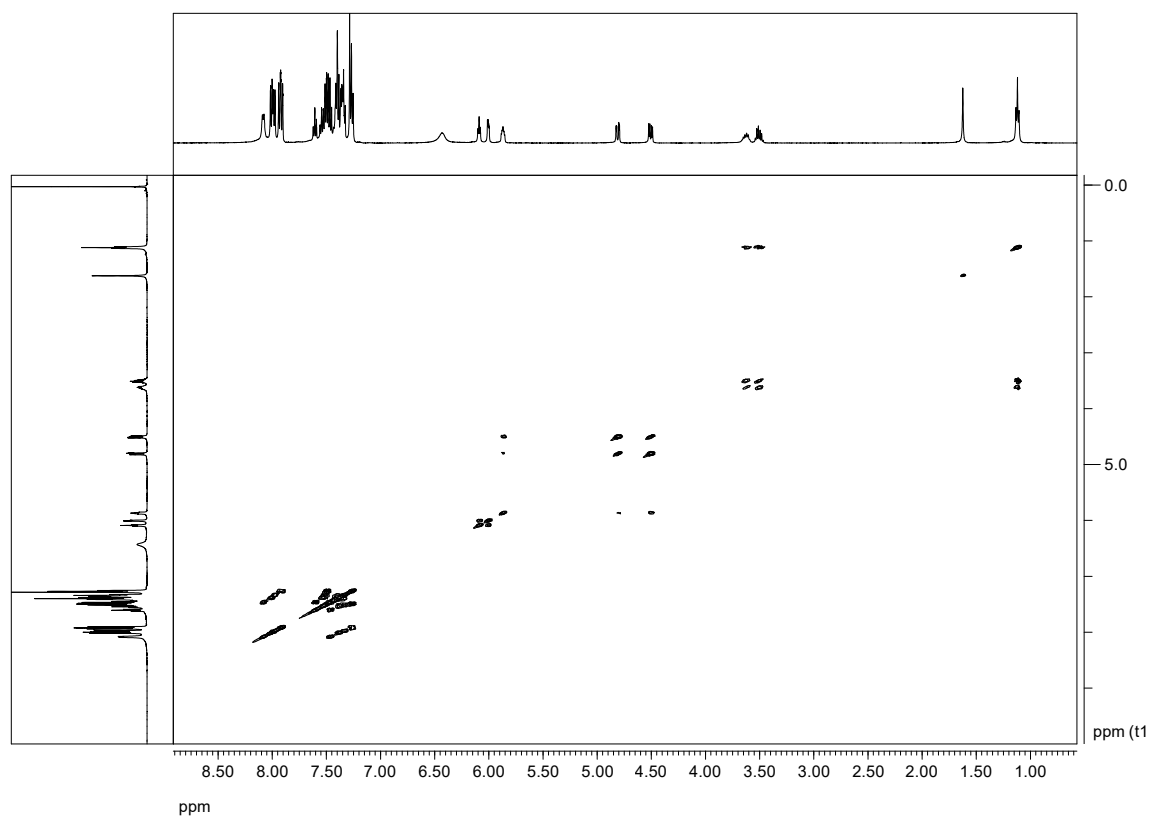

**Figure S56.** COSY spectrum of **20** in  $\text{CDCl}_3$ .

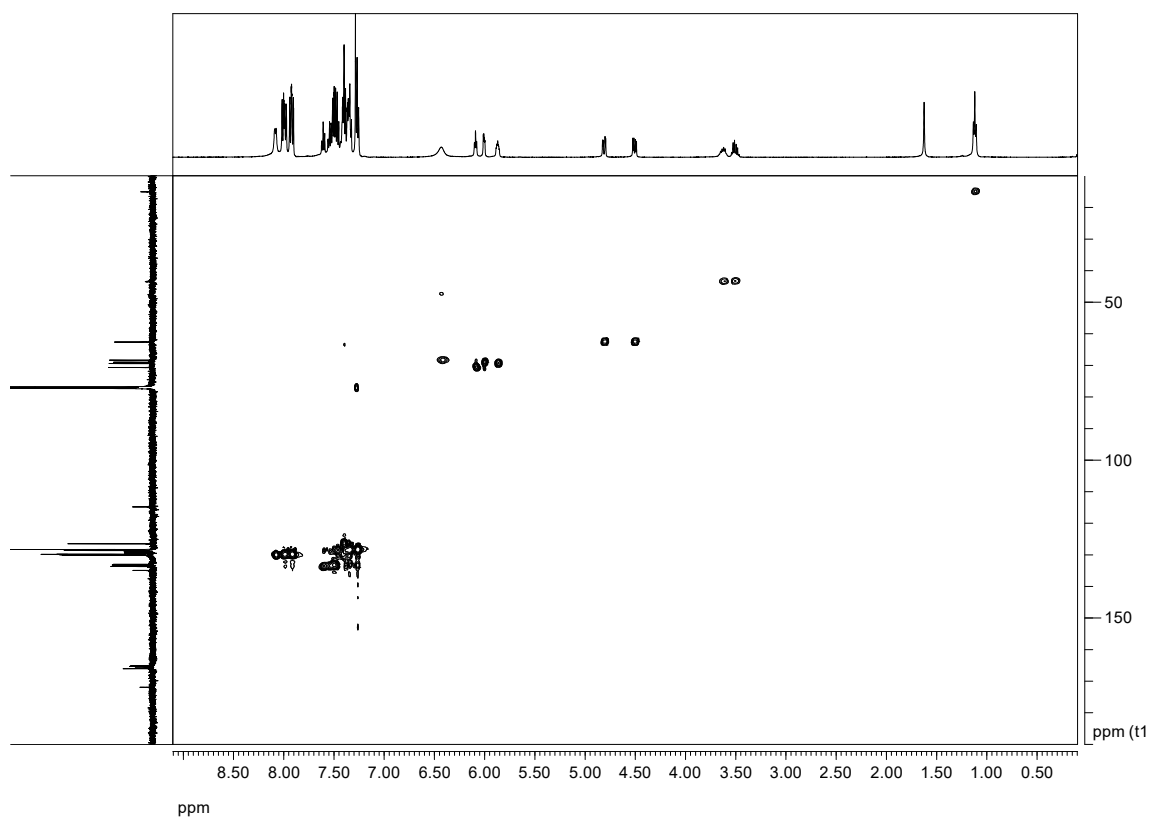

**Figure S57.** HMQC spectrum of **20** in  $\text{CDCl}_3$ .

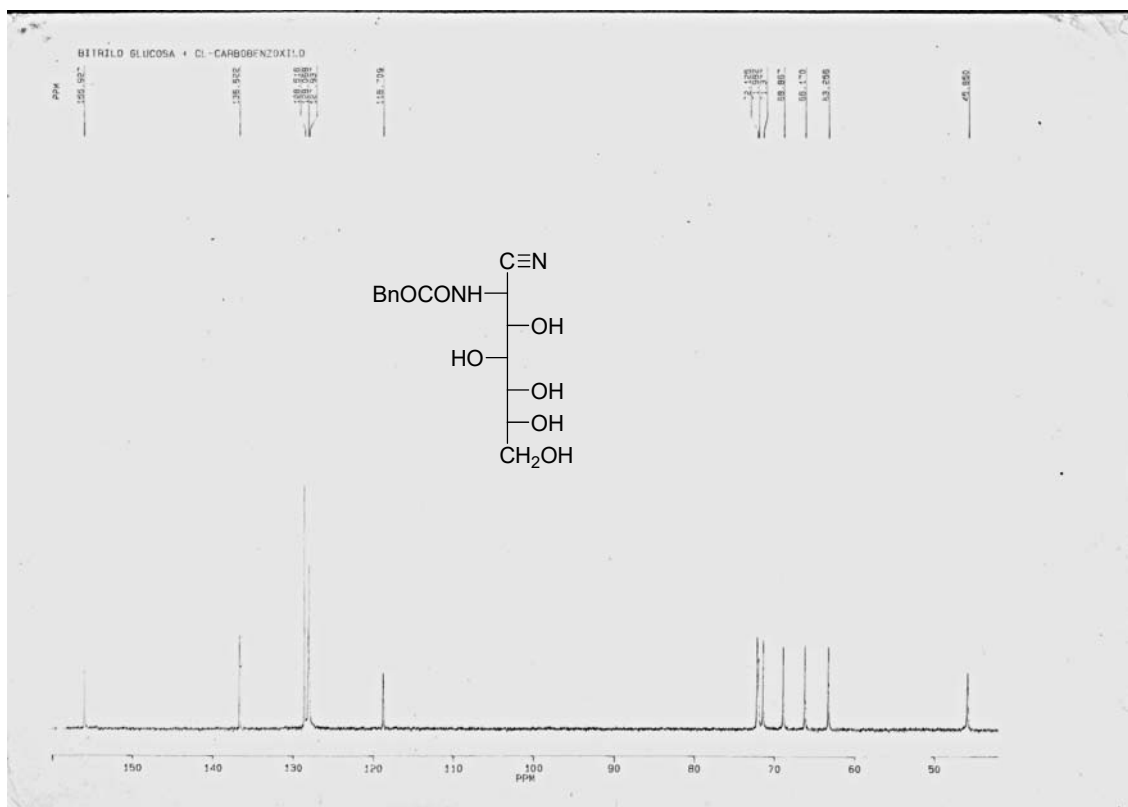

**Figure S58.**  $^{13}\text{C}\{^1\text{H}\}$  NMR spectrum of **26** in  $\text{DMSO}-d_6$ .

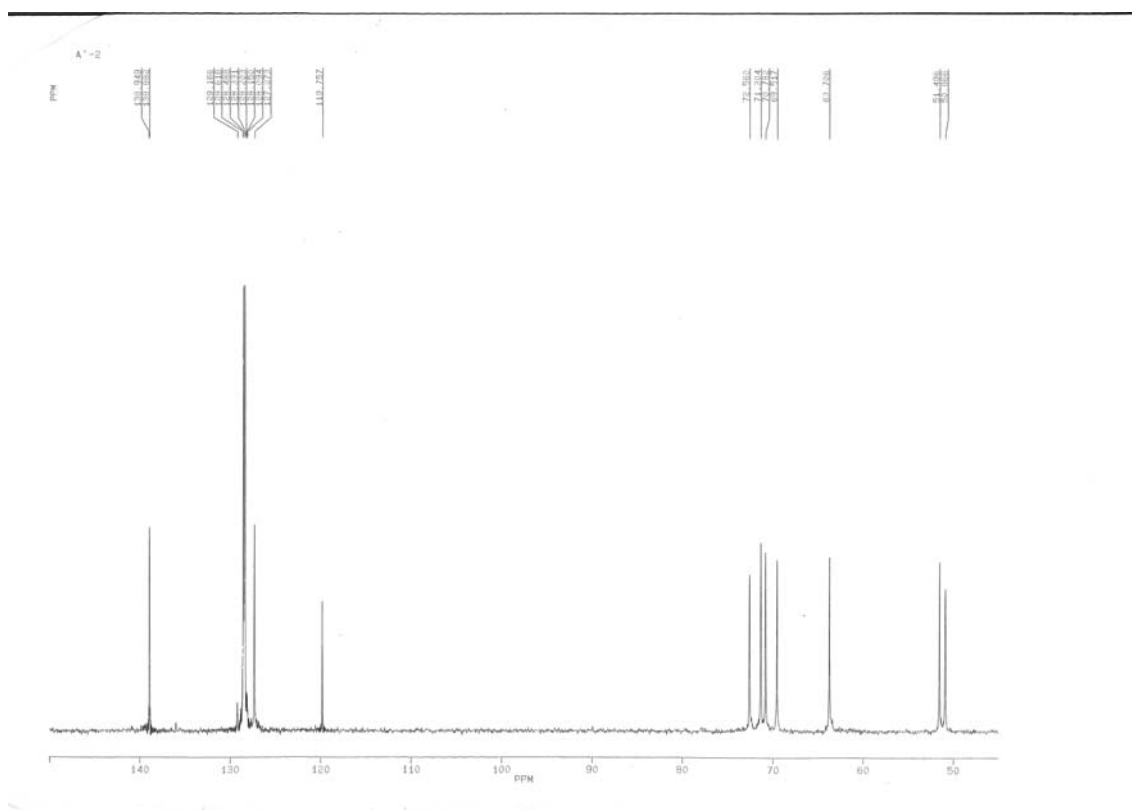

**Figure S59.**  $^{13}\text{C}\{^1\text{H}\}$  NMR spectrum of **33** in  $\text{CDCl}_3$ .

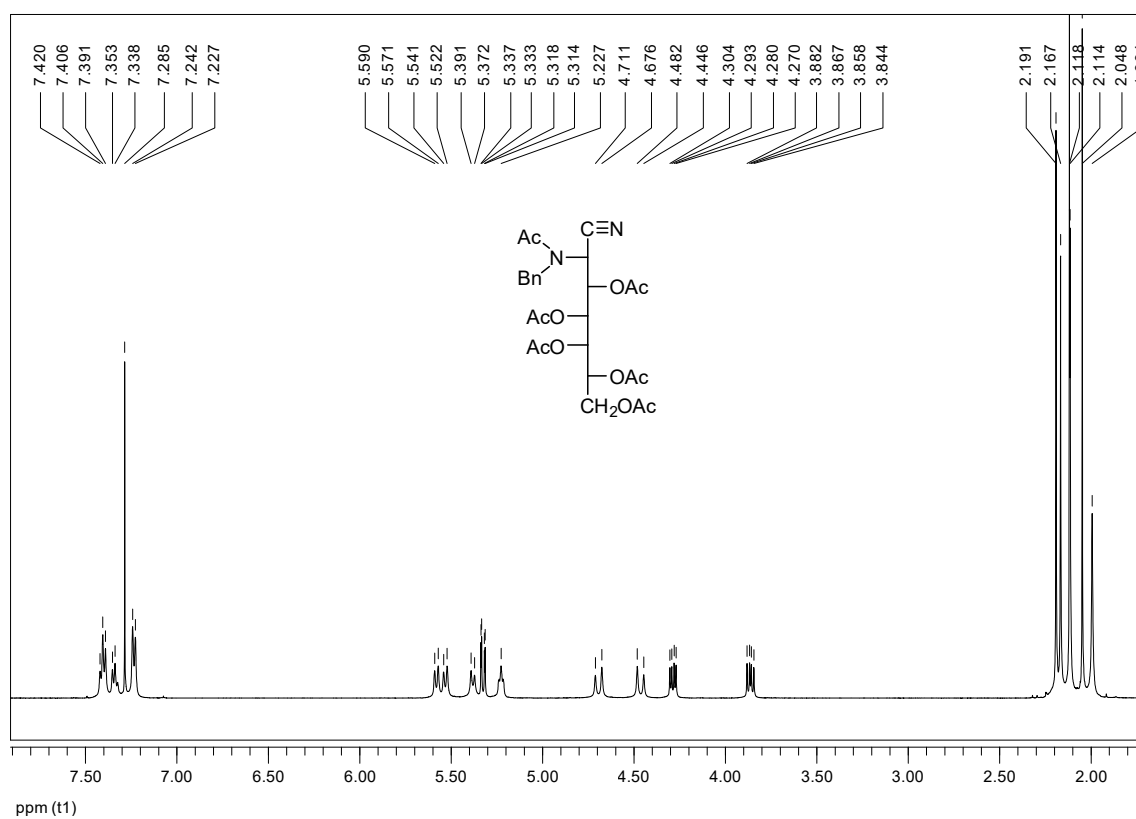

**Figure S60.** <sup>1</sup>H NMR spectrum of **37** in CDCl<sub>3</sub>.

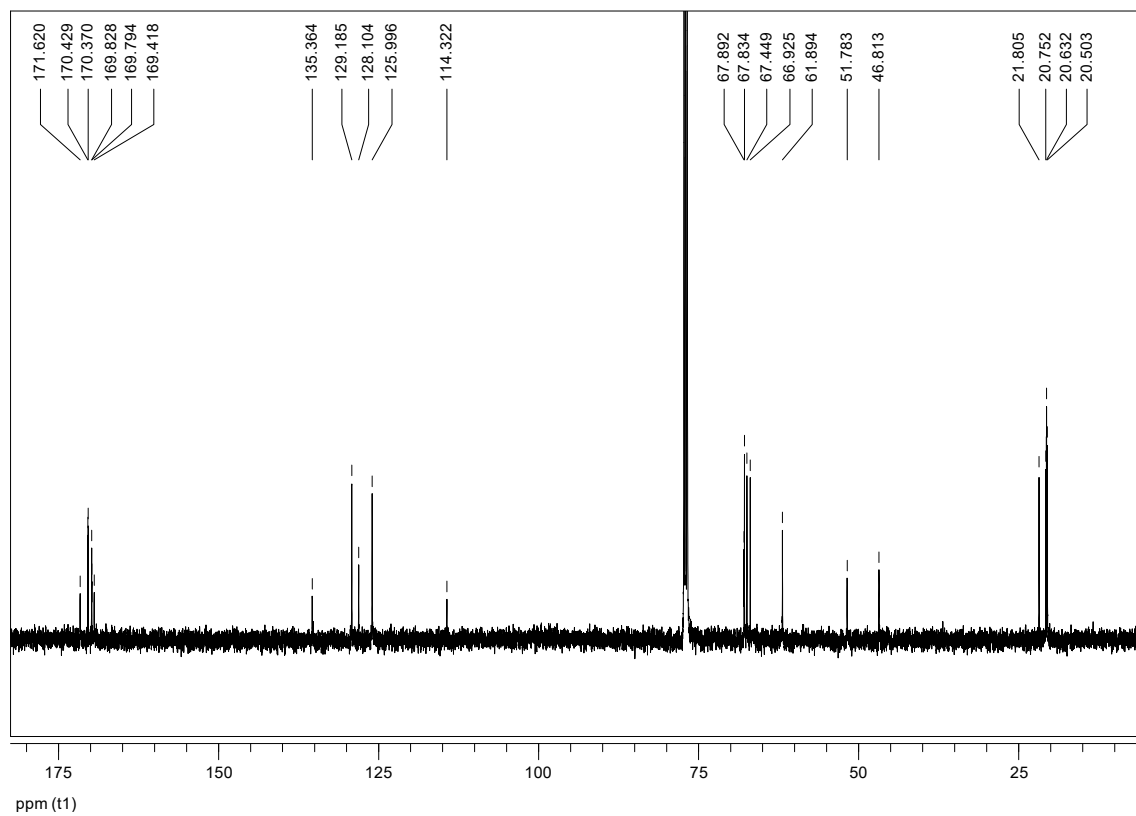

**Figure S61.** <sup>13</sup>C{<sup>1</sup>H} NMR spectrum of **37** in CDCl<sub>3</sub>.

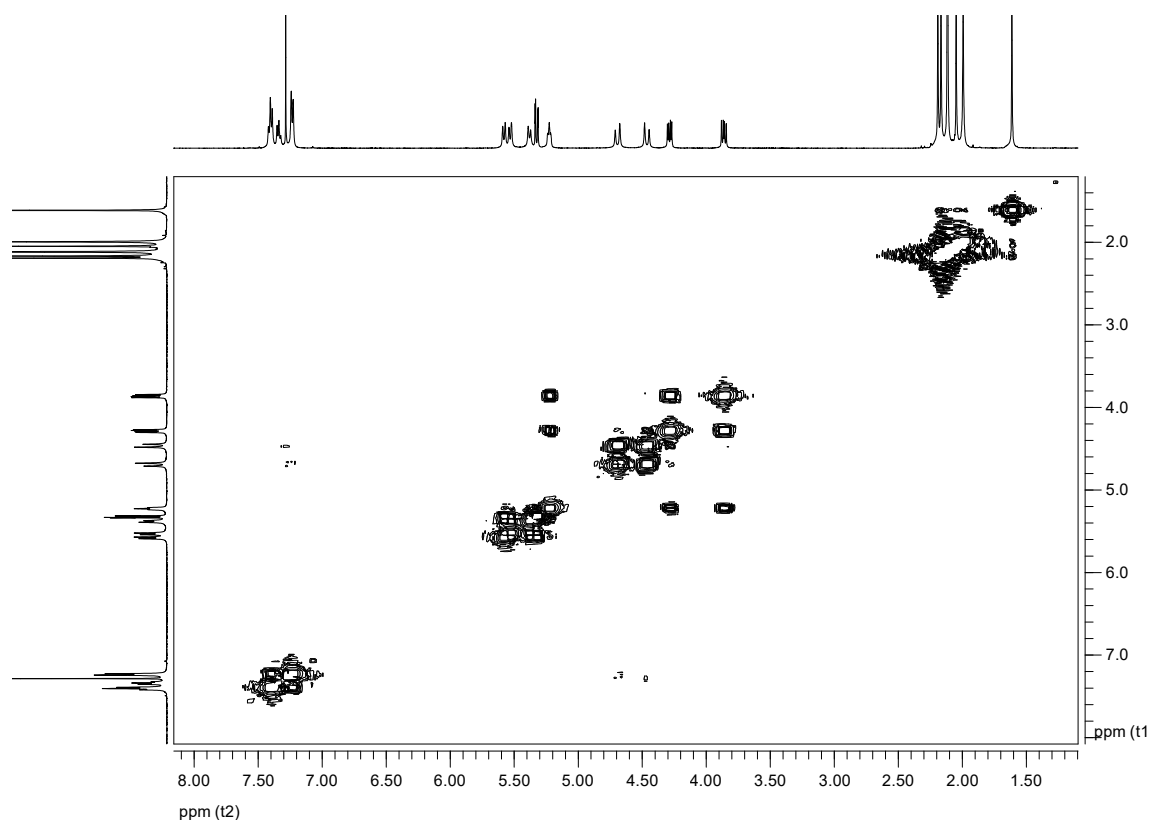

**Figure S62.** COSY spectrum of **37** in  $\text{CDCl}_3$ .

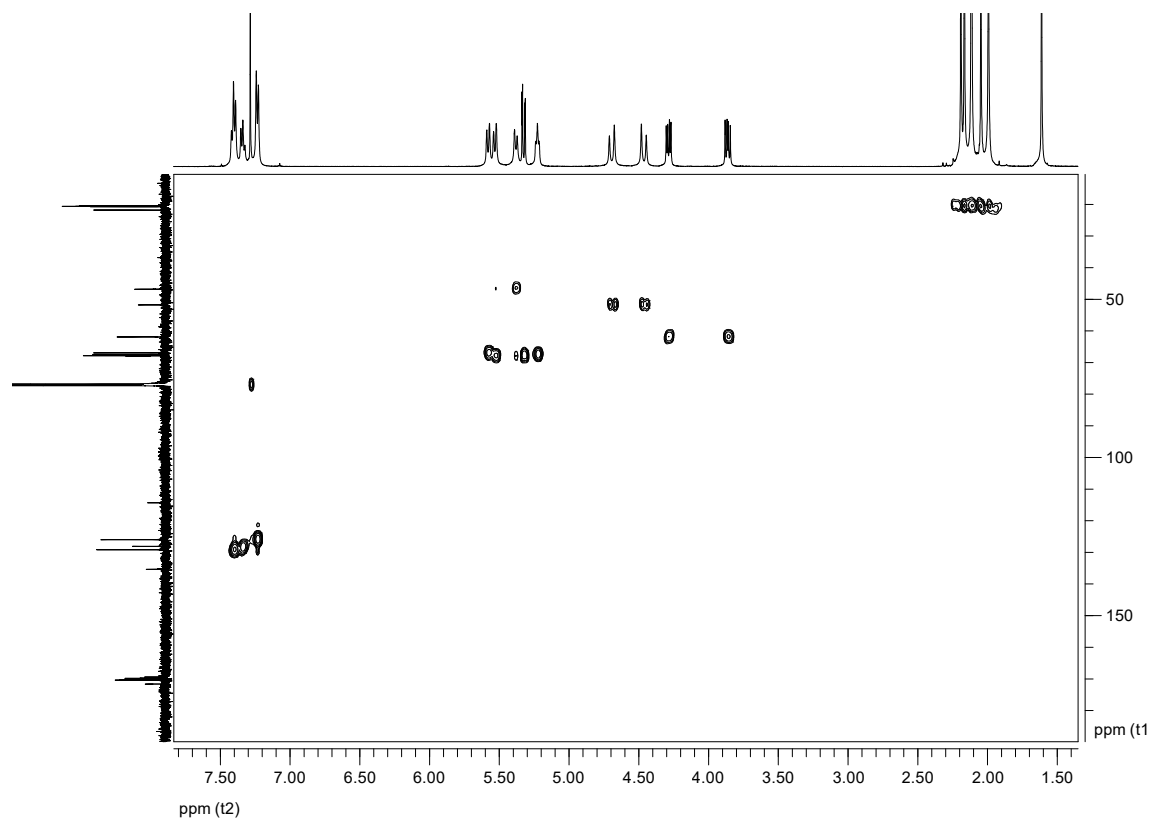

**Figure S63.** HMBC spectrum of **37** in  $\text{CDCl}_3$ .

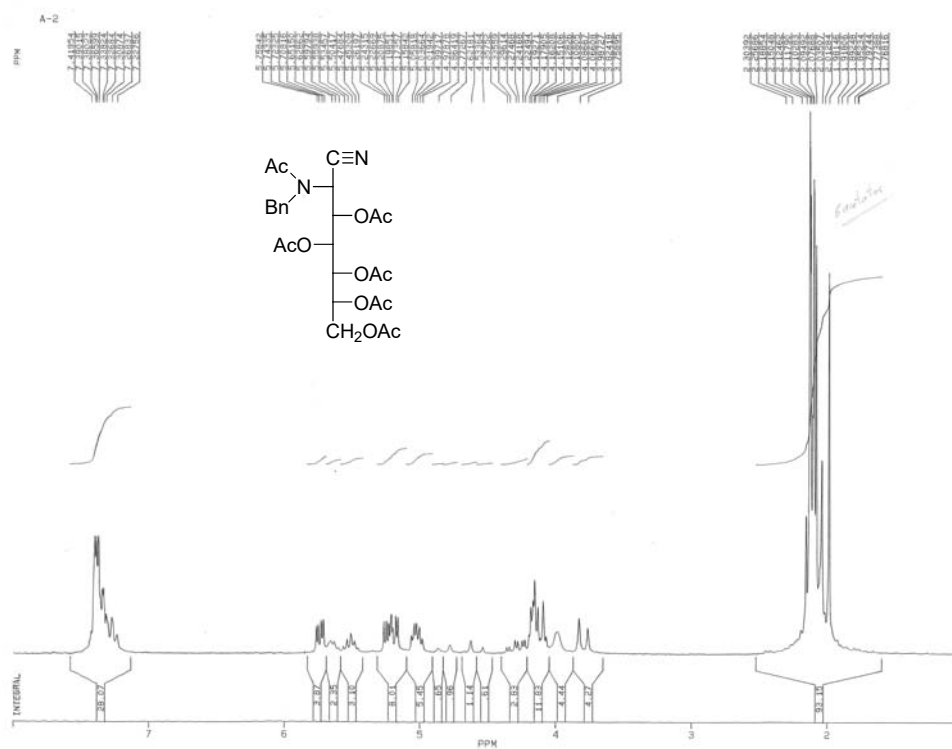

Figure S64. <sup>1</sup>H NMR spectrum of **38** in CDCl<sub>3</sub>.

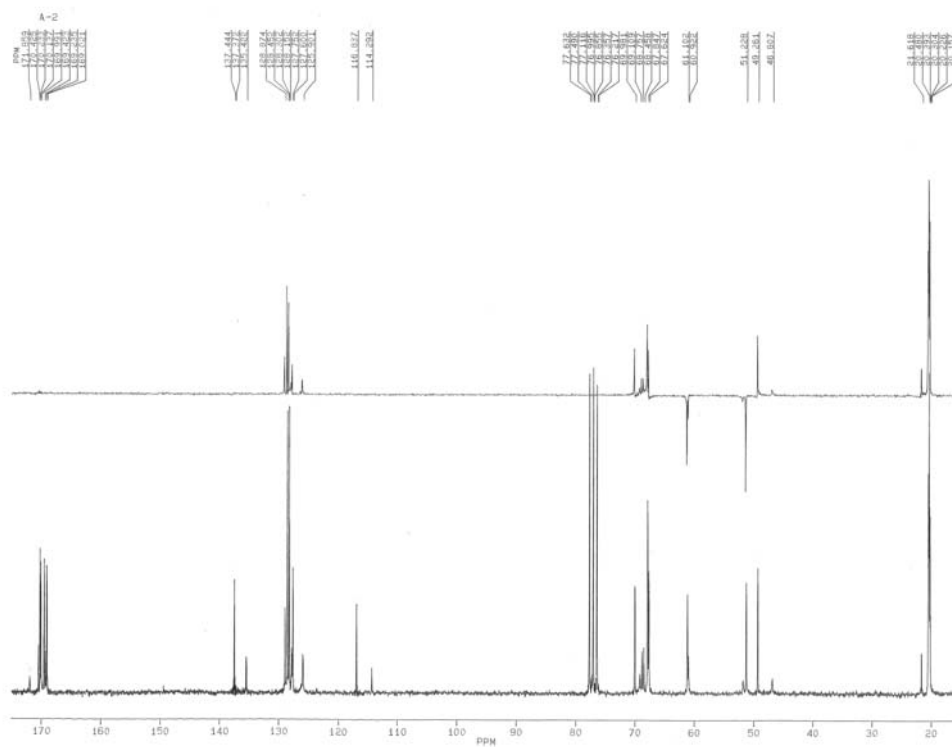

Figure S65. <sup>13</sup>C{<sup>1</sup>H} NMR and DEPT spectra of **38** in CDCl<sub>3</sub>



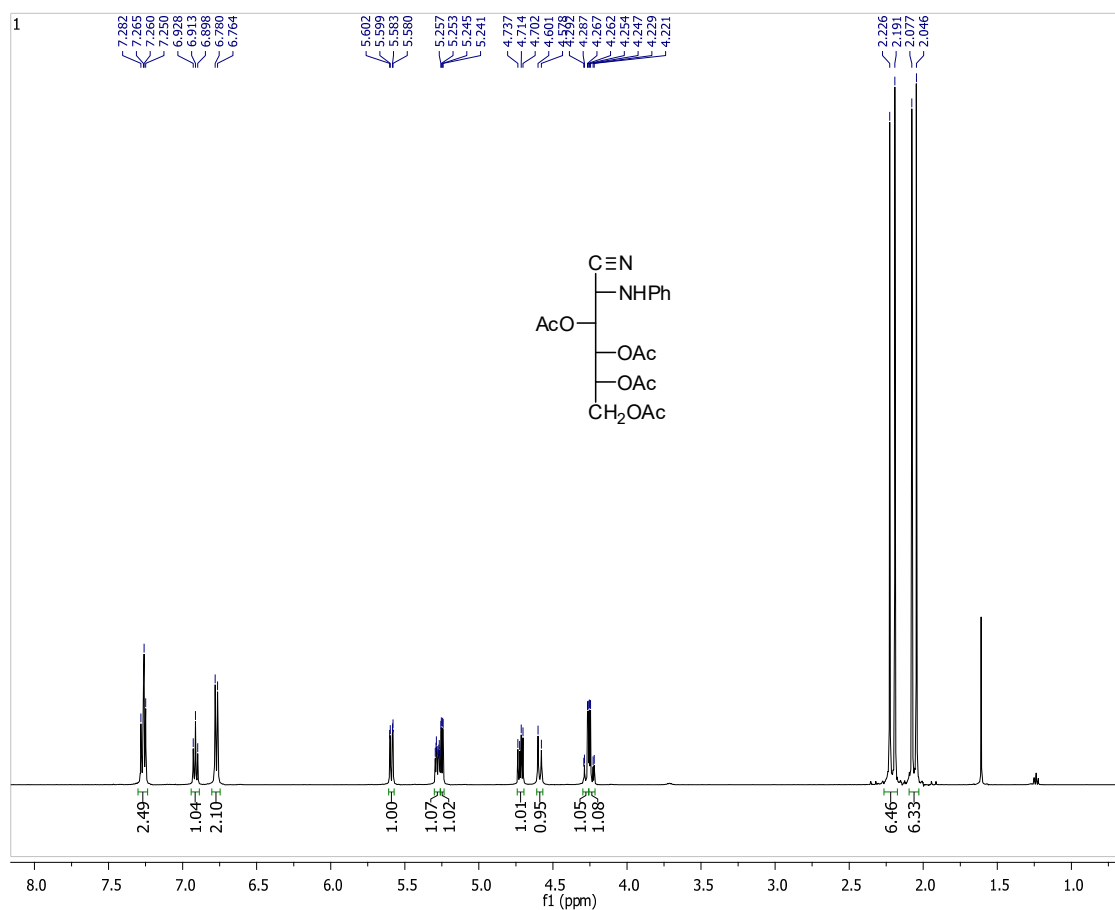

Figure S66. <sup>1</sup>H NMR spectrum of **42** in CDCl<sub>3</sub>.

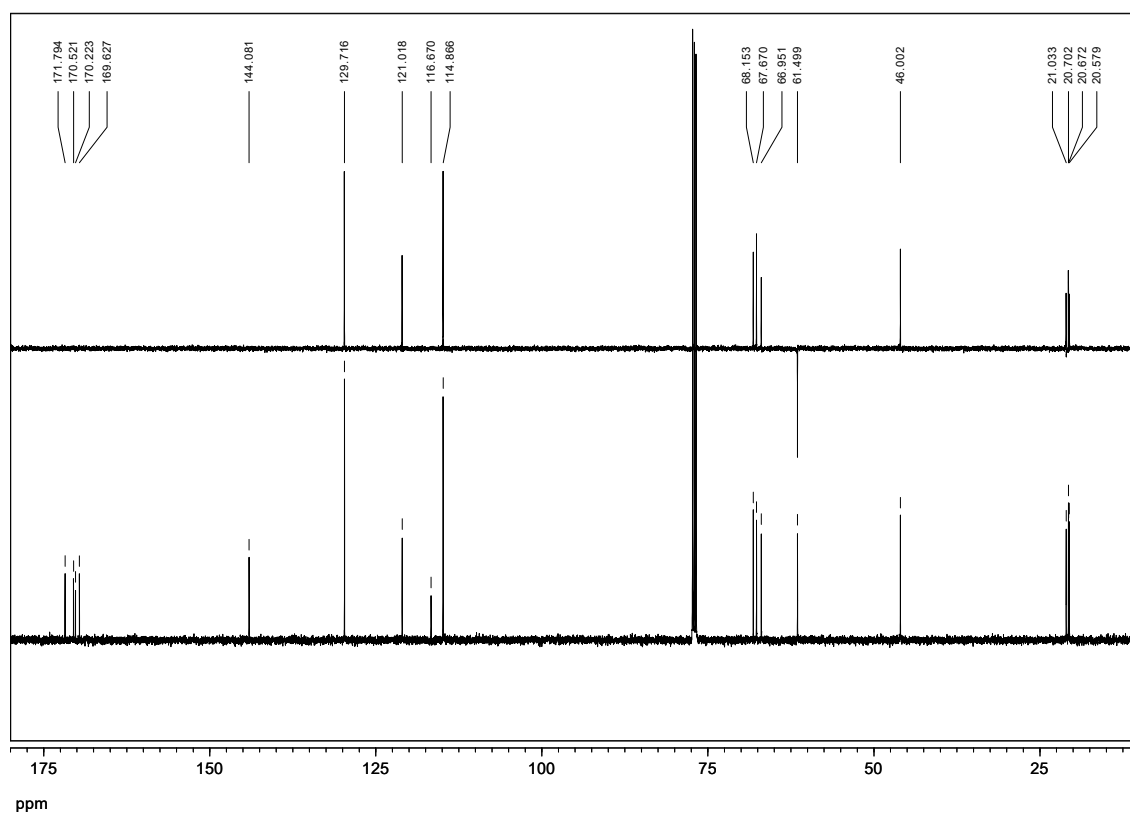

Figure S67. <sup>13</sup>C{<sup>1</sup>H} NMR and DEPT spectra of **42** in CDCl<sub>3</sub>.

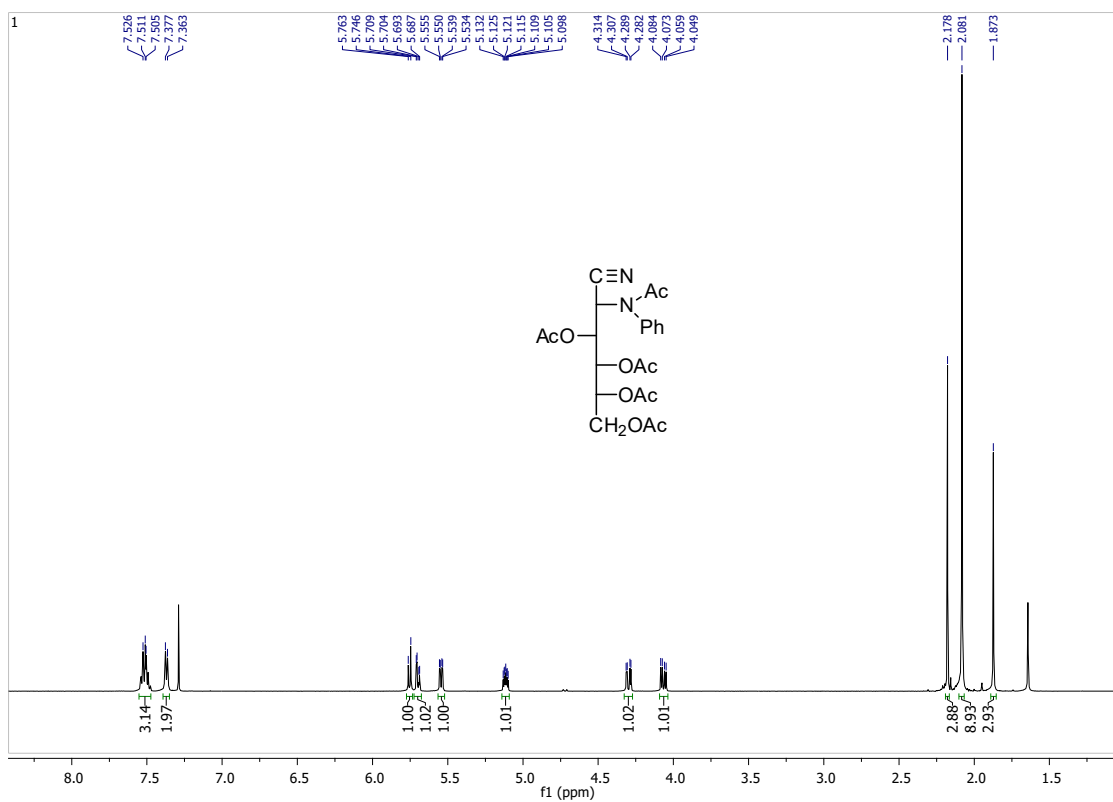

Figure S68. <sup>1</sup>H NMR spectrum of **43** in CDCl<sub>3</sub>.

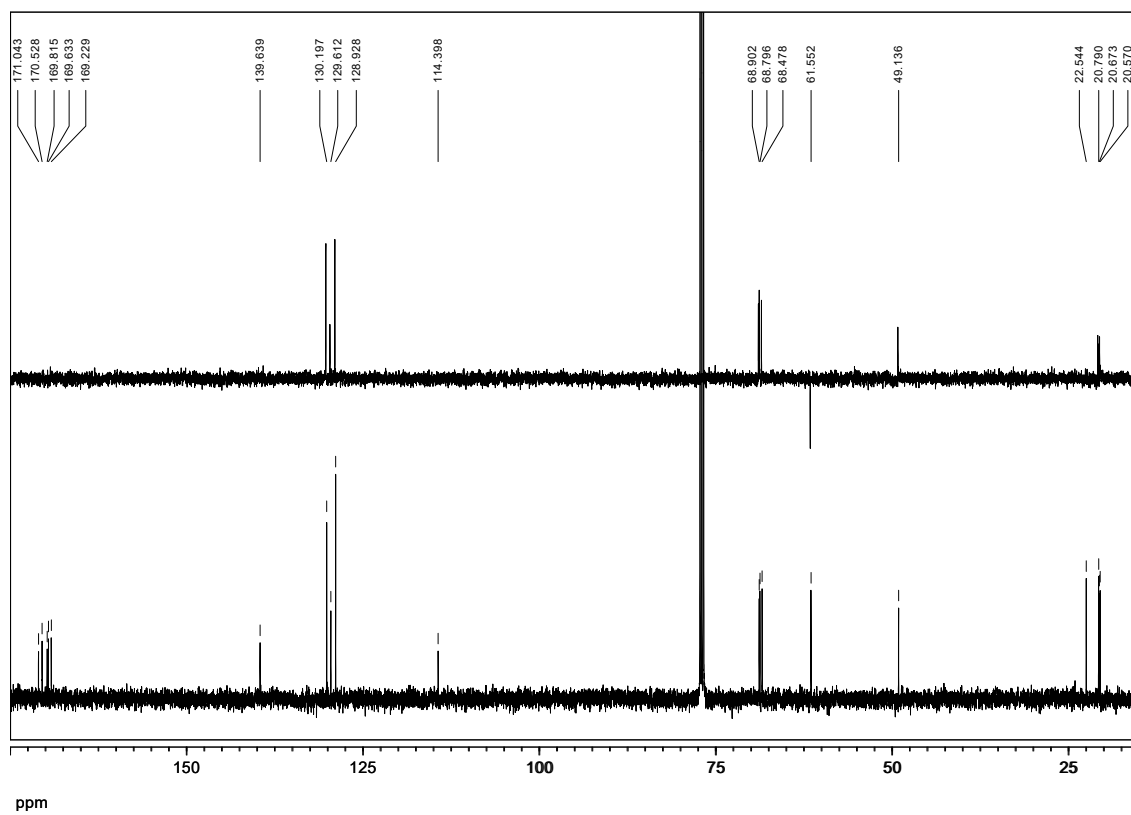

Figure S69. <sup>13</sup>C{<sup>1</sup>H} NMR and DEPT spectra of **43** in CDCl<sub>3</sub>.

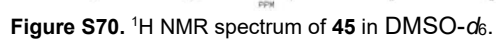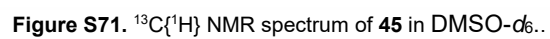

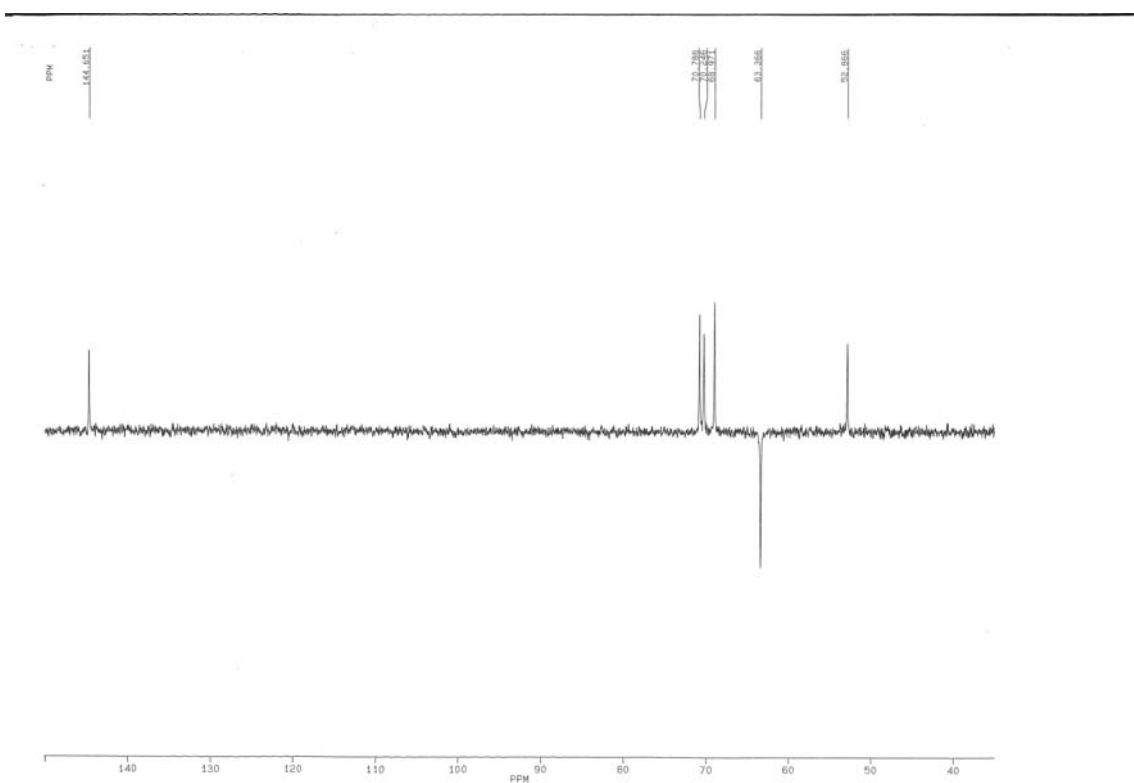

Figure S72. DEPT spectrum of **45** in DMSO- $d_6$ .

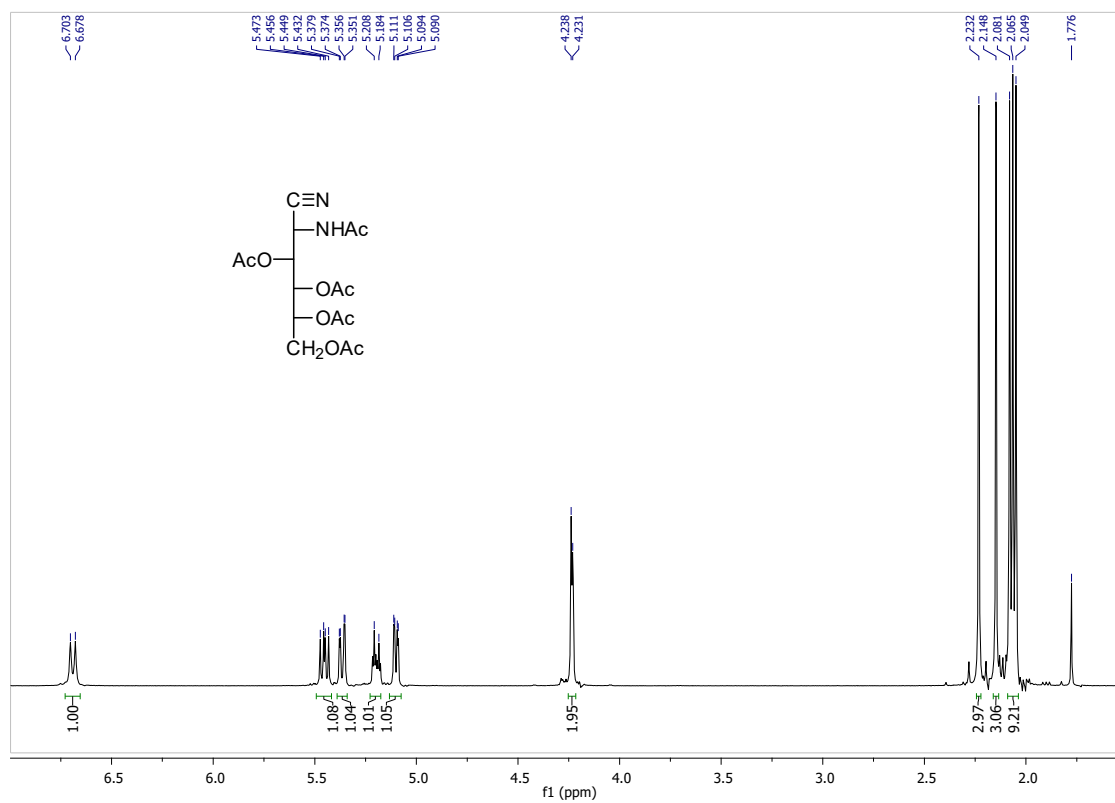

Figure S73.  $^1\text{H}$  NMR spectrum of **47** in  $\text{CDCl}_3$ .

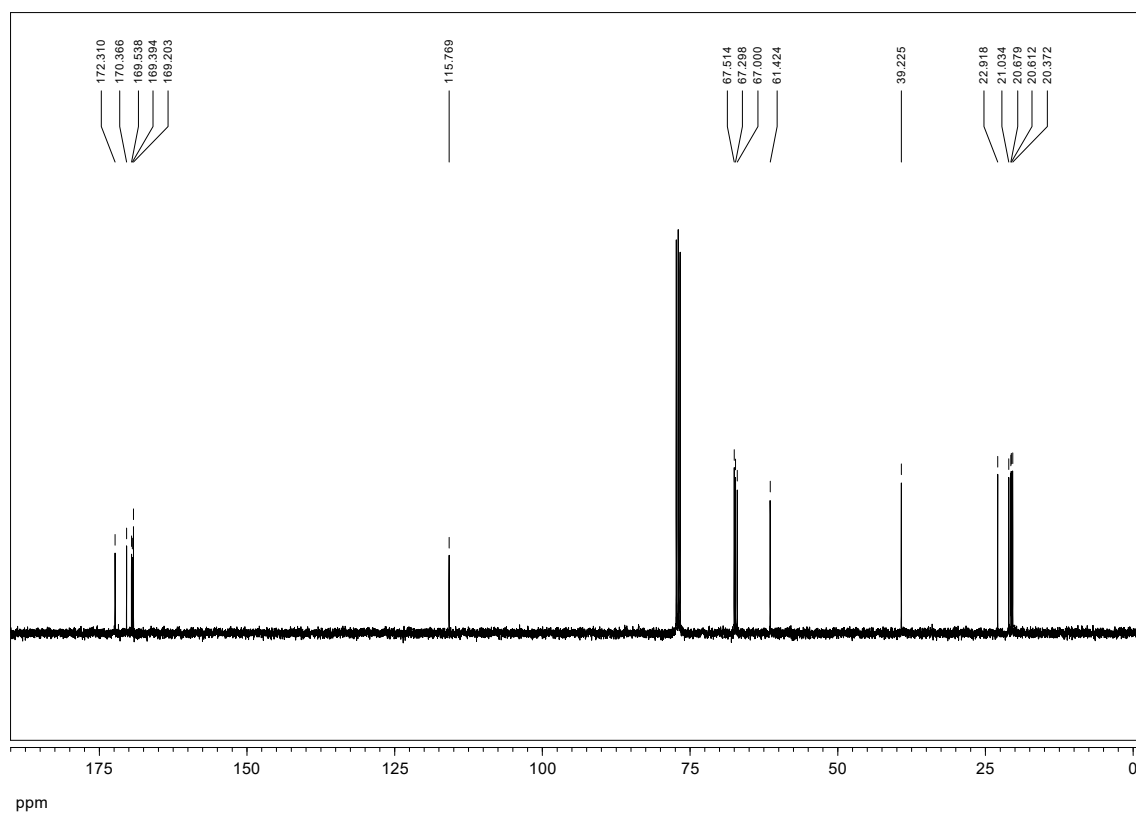

**Figure S74.**  $^{13}\text{C}\{^1\text{H}\}$  NMR spectrum of **47** in  $\text{CDCl}_3$ .

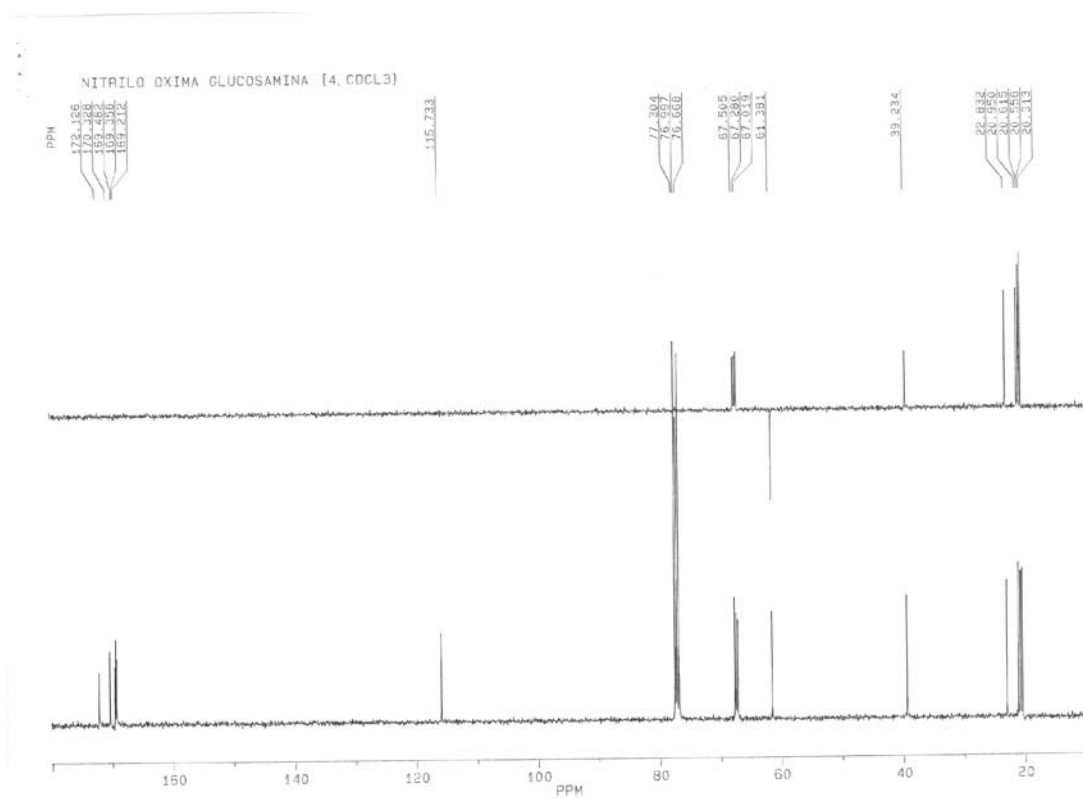

**Figure S75.**  $^{13}\text{C}\{^1\text{H}\}$  NMR and DEPT spectra of **47** in  $\text{CDCl}_3$ .





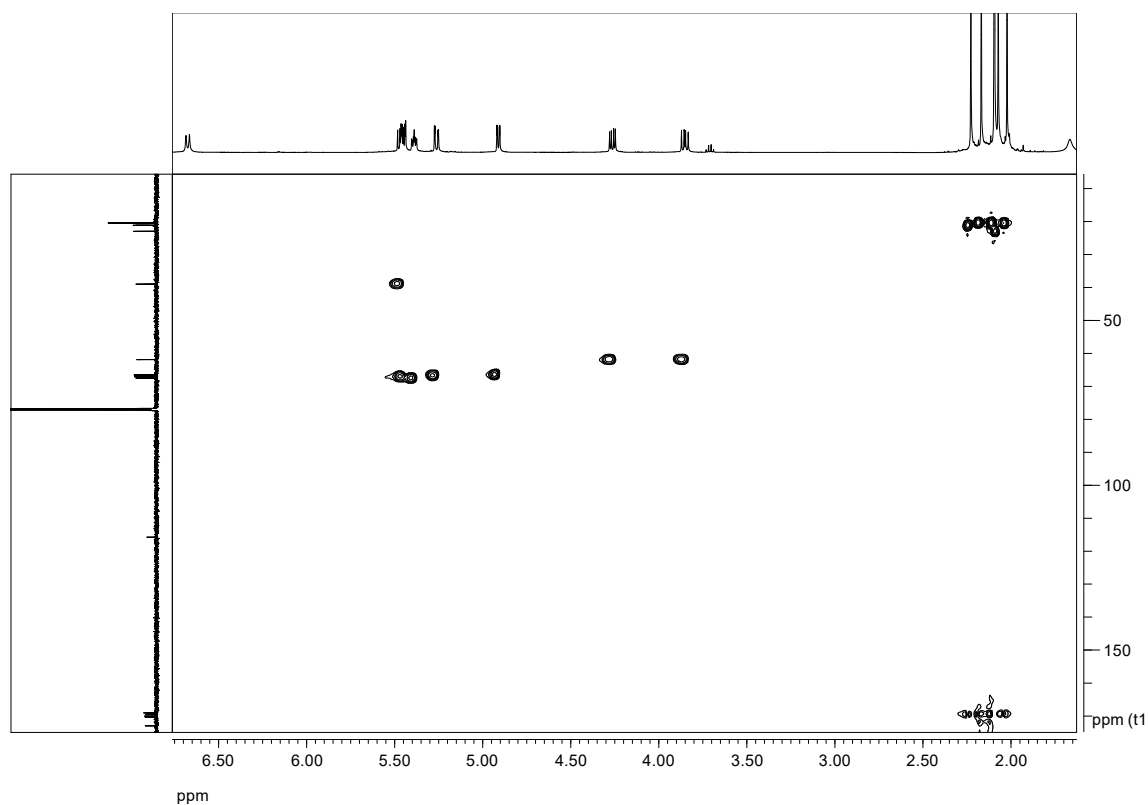

**Figure S80.** HMBC spectrum of **51** in  $\text{CDCl}_3$ .

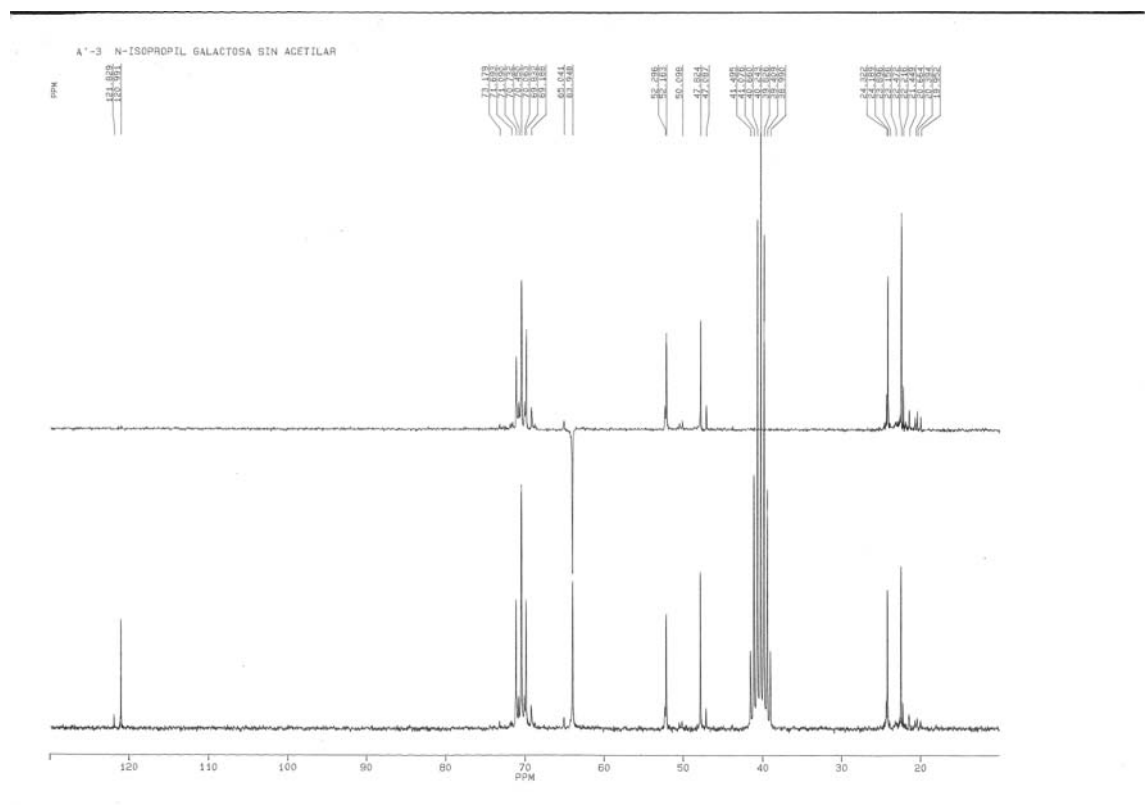

**Figure S81.**  $^{13}\text{C}\{^1\text{H}\}$  NMR and DEPT spectra of **54** in  $\text{DMSO}-d_6$ .



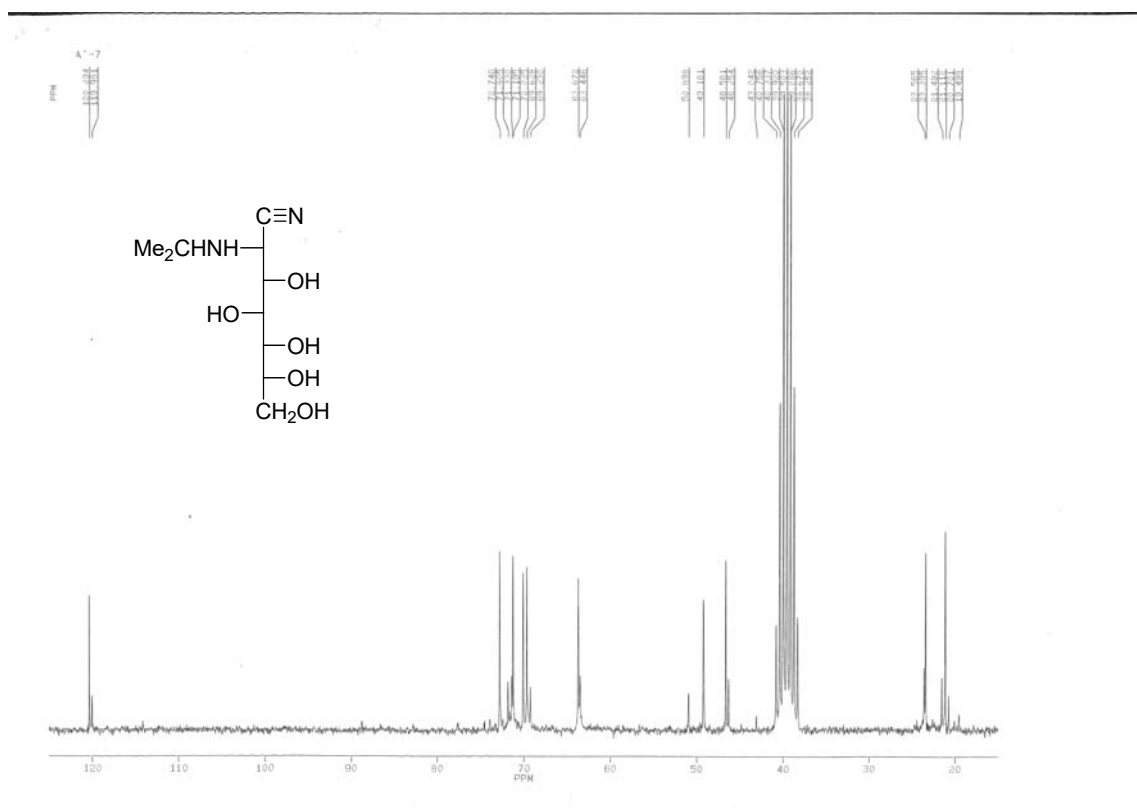

**Figure S82.** <sup>13</sup>C{<sup>1</sup>H} NMR spectrum of **55** in DMSO-*d*<sub>6</sub>.

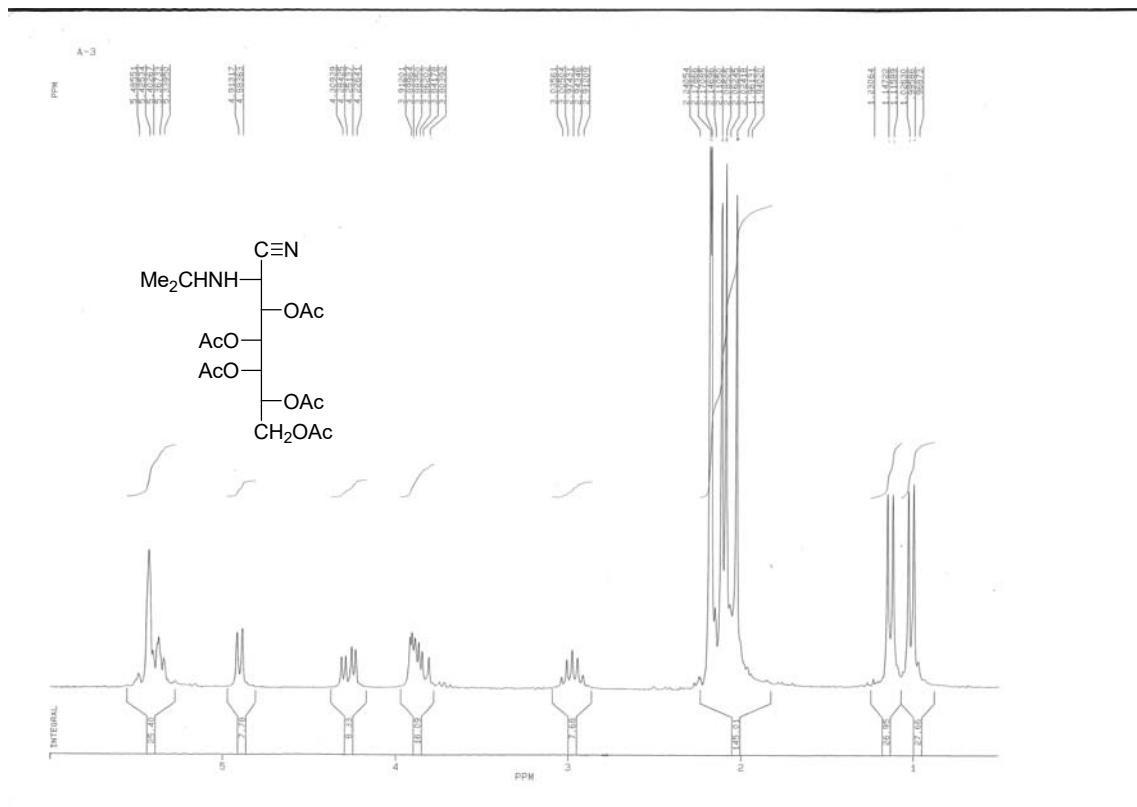

**Figure S83.** <sup>1</sup>H NMR spectrum of **58** in CDCl<sub>3</sub>.

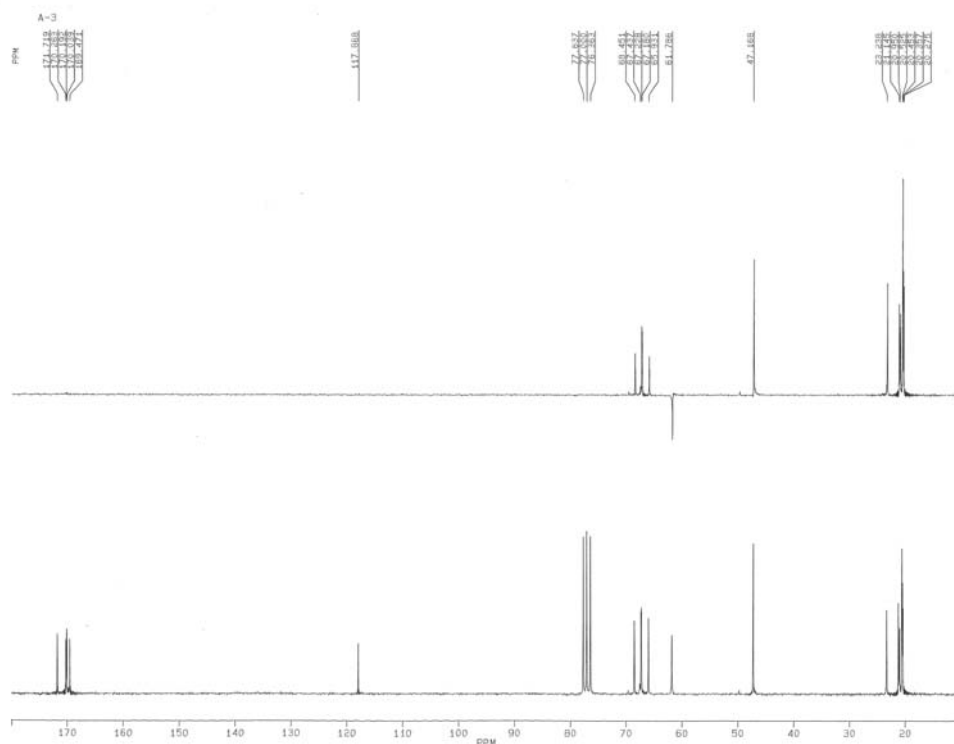

**Figure S84.**  $^{13}\text{C}\{^1\text{H}\}$  NMR and DEPT spectra of **58** in  $\text{CDCl}_3$ .

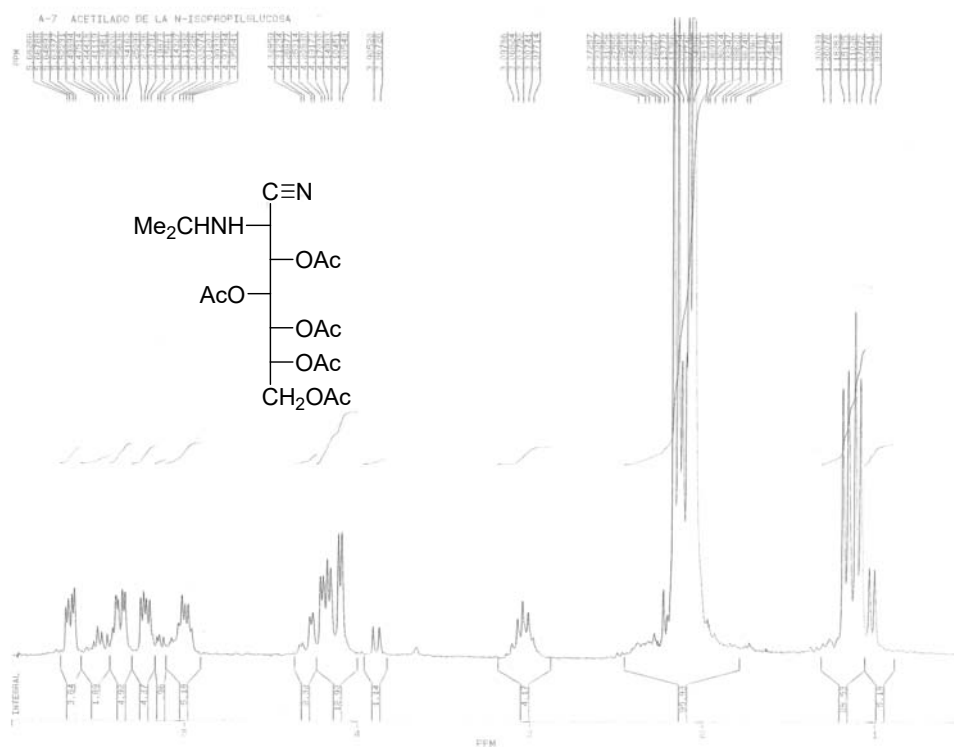

**Figure S85.**  $^1\text{H}$  NMR spectrum of **59** and **61** in  $\text{CDCl}_3$

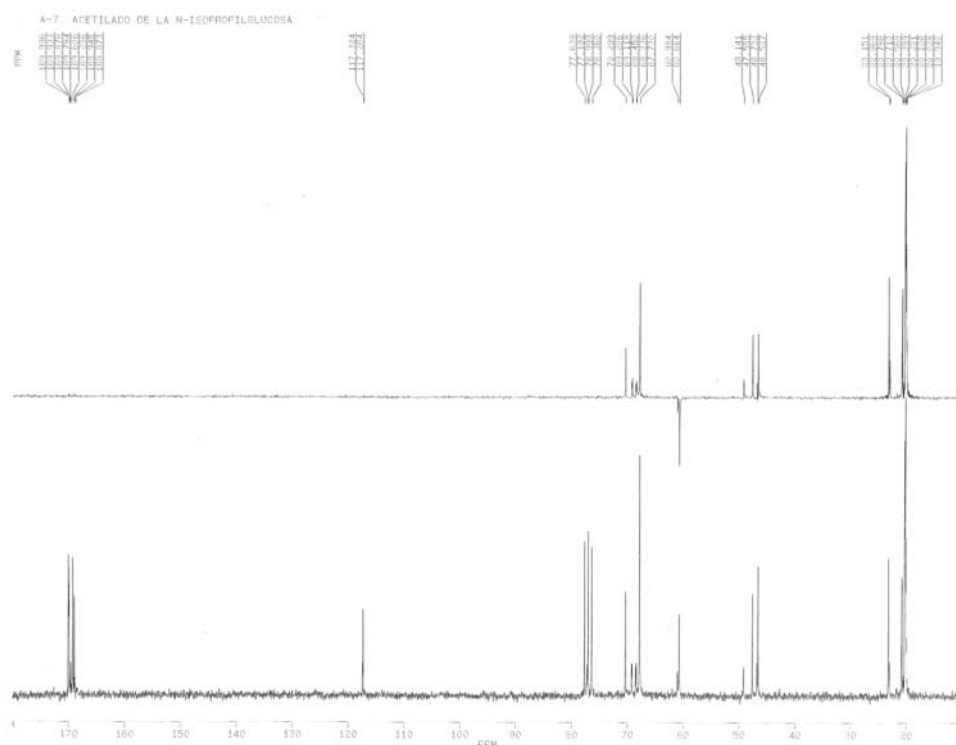

Figure S86.  $^{13}\text{C}\{^1\text{H}\}$  NMR and DEPT spectra of **59** and **61** in  $\text{CDCl}_3$

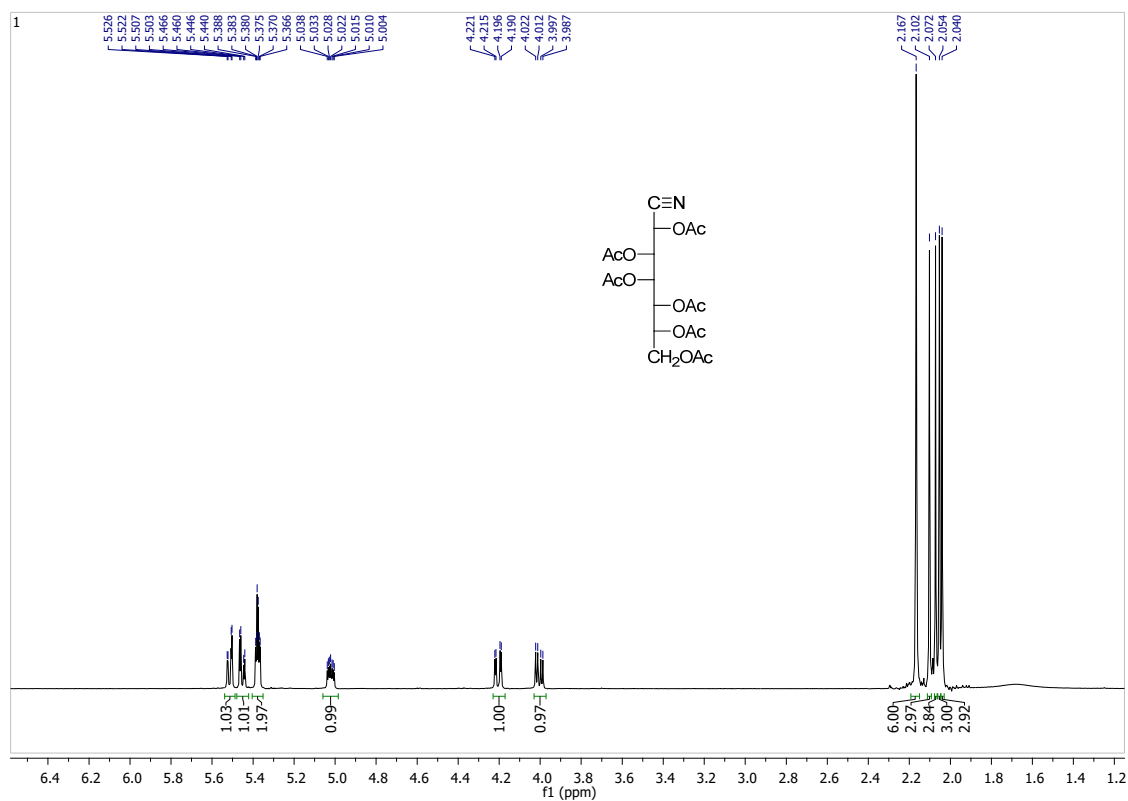

Figure S87.  $^1\text{H}$  NMR spectrum of **63** in  $\text{CDCl}_3$

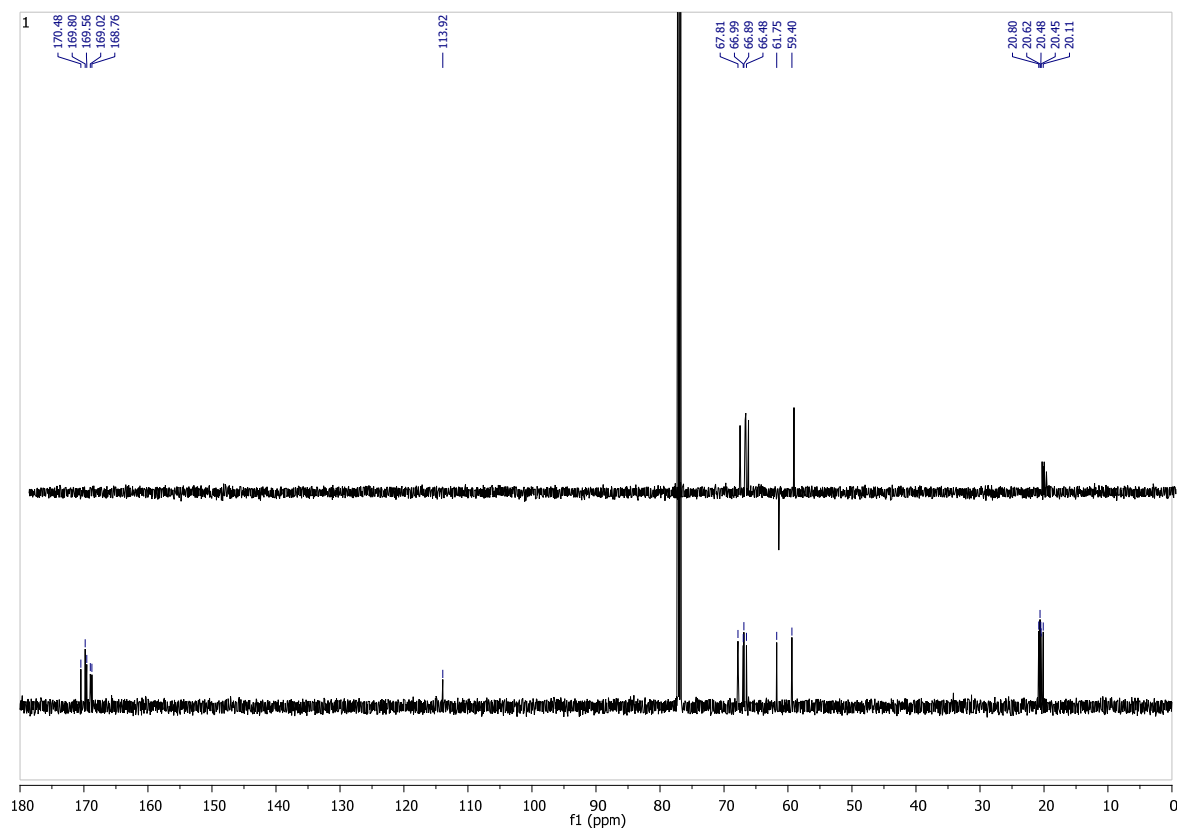

Figure S88.  $^{13}\text{C}\{^1\text{H}\}$  NMR and DEPT spectra of **63** in  $\text{CDCl}_3$

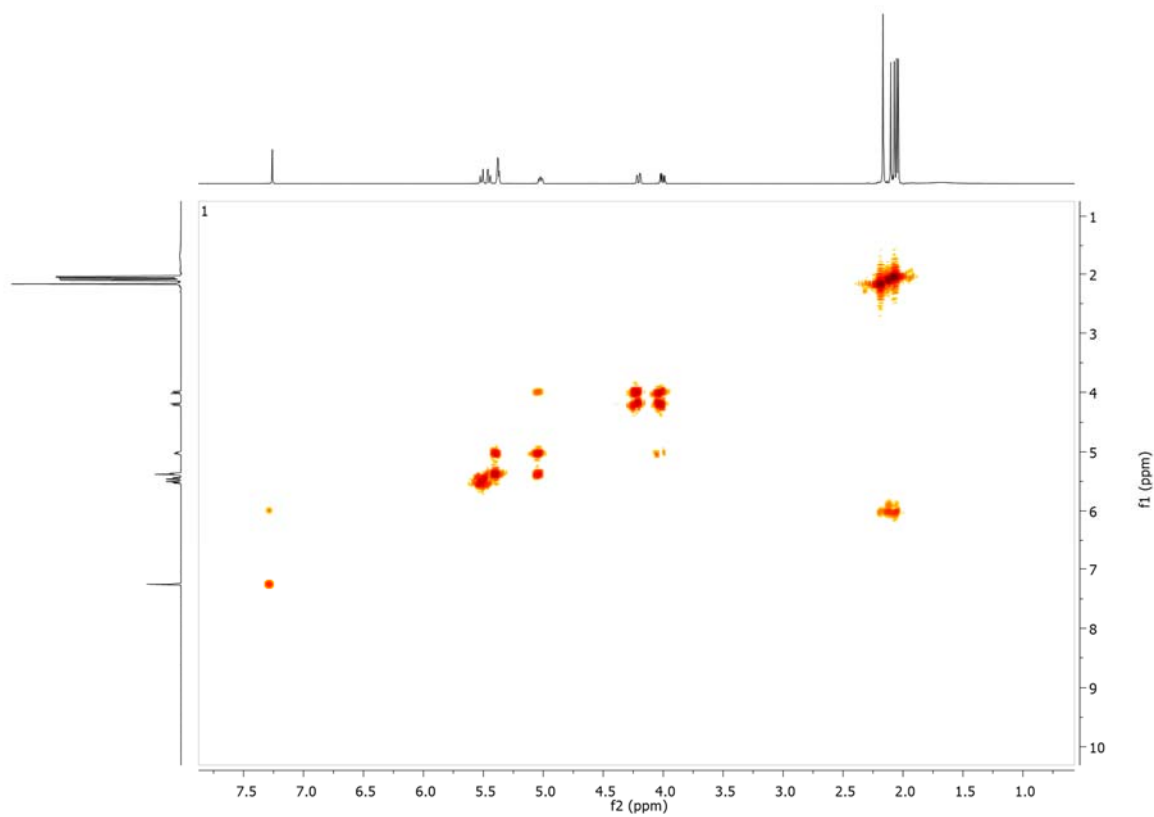

Figure S89. COSY spectrum of **63** in  $\text{CDCl}_3$

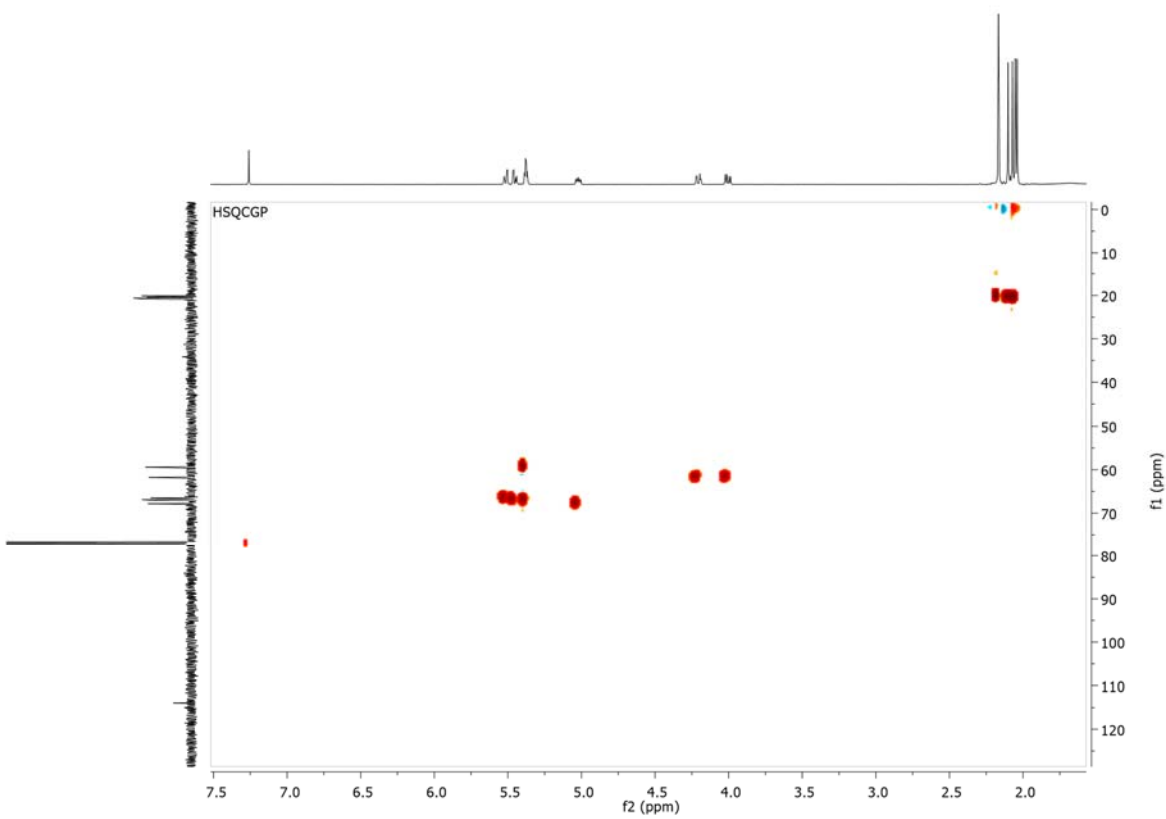

**Figure S90.** HMQC spectrum of **63** in CDCl<sub>3</sub>

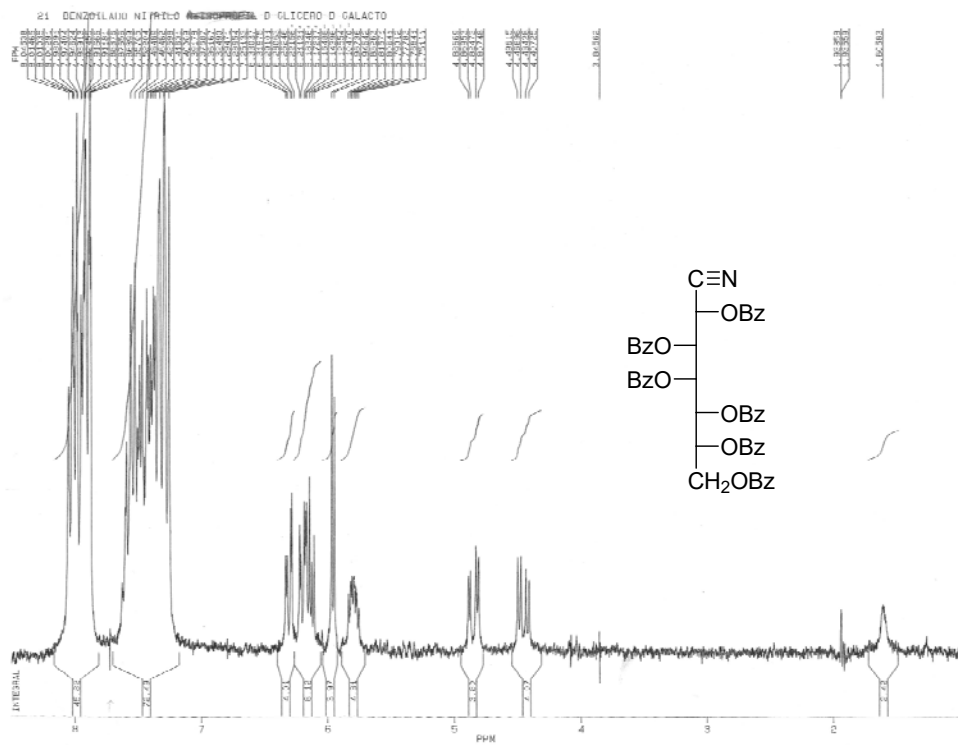

**Figure S91.**  $^1\text{H}$  NMR spectrum of **64** in  $\text{CDCl}_3$

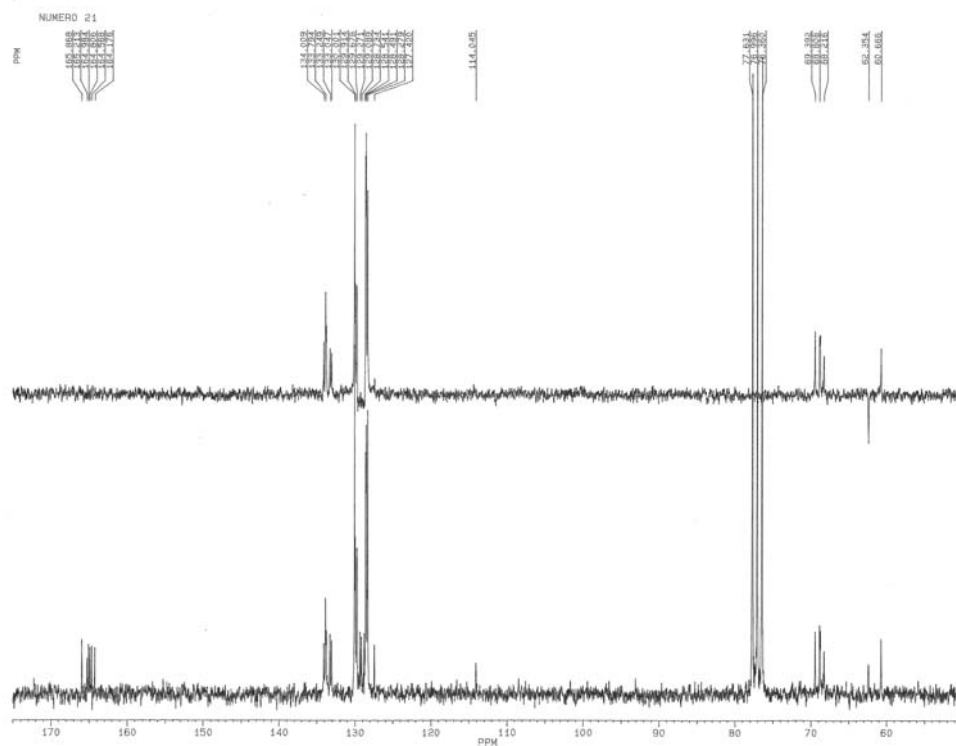

DS90 JCP0001.52 RT= 03:46 +EI SLRP 07/30/90 09:47  
TIC= 6130432 100%= 689824 1 PM=414 70 A 10/MIN.

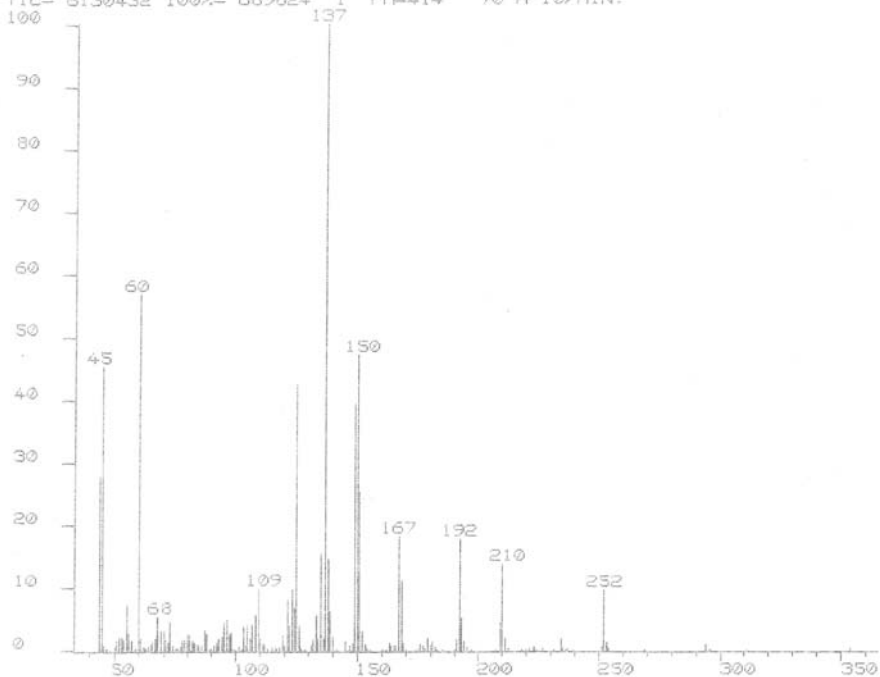

Figure S94. Mass spectrum (EI) of 11.

DS90 JCP0002.46 RT= 03:19 +EI SLRP 07/30/90 10:11  
TIC= 3697792 100%= 330992 2 428 80 A 10/MIN.

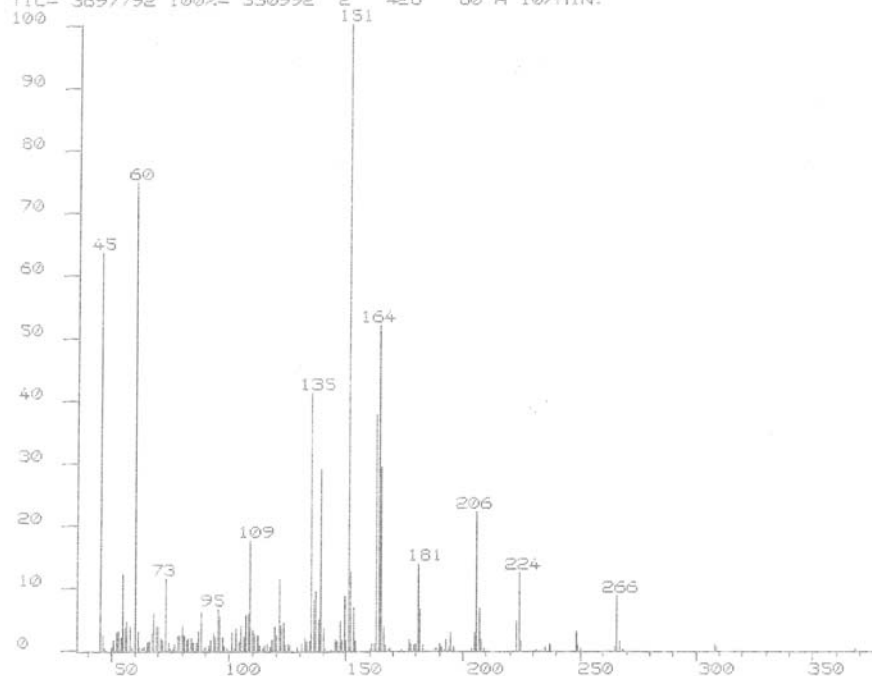

Figure S95. Mass spectrum (EI) of 12.

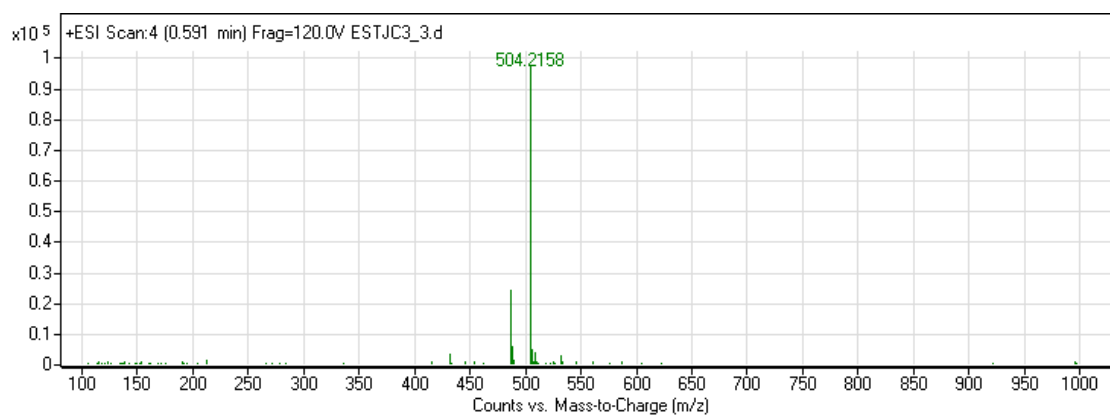

**Figure S96.** Mass spectrum of **13**.

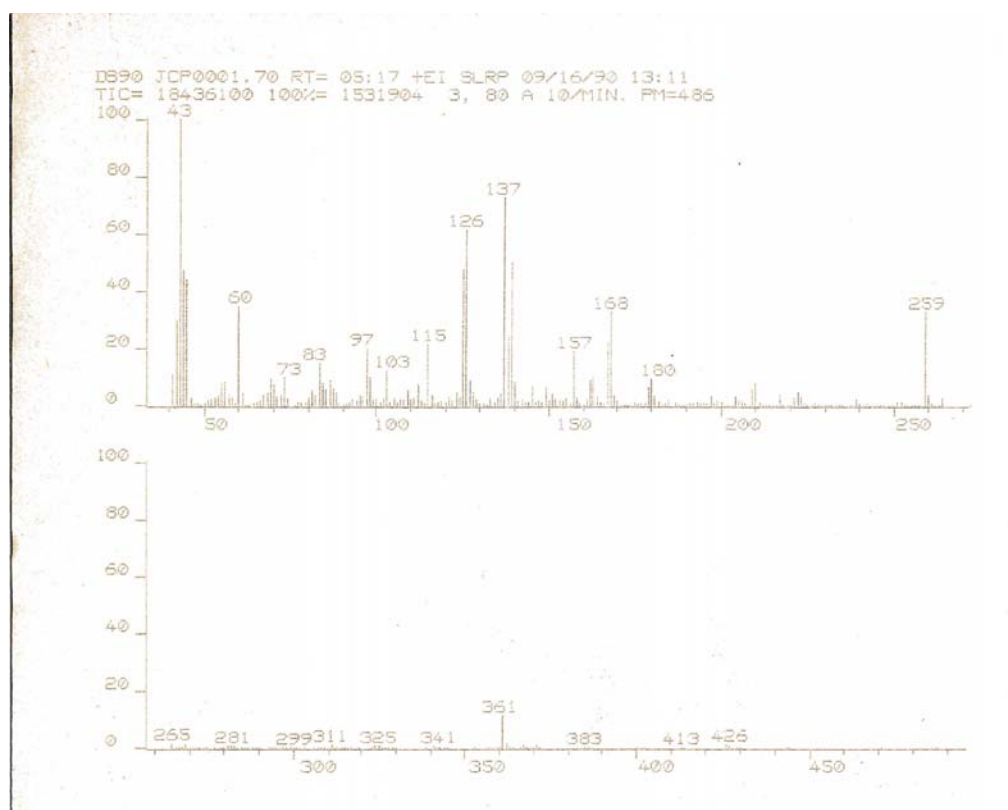

**Figure S97.** Mass spectrum (EI) of **13**.



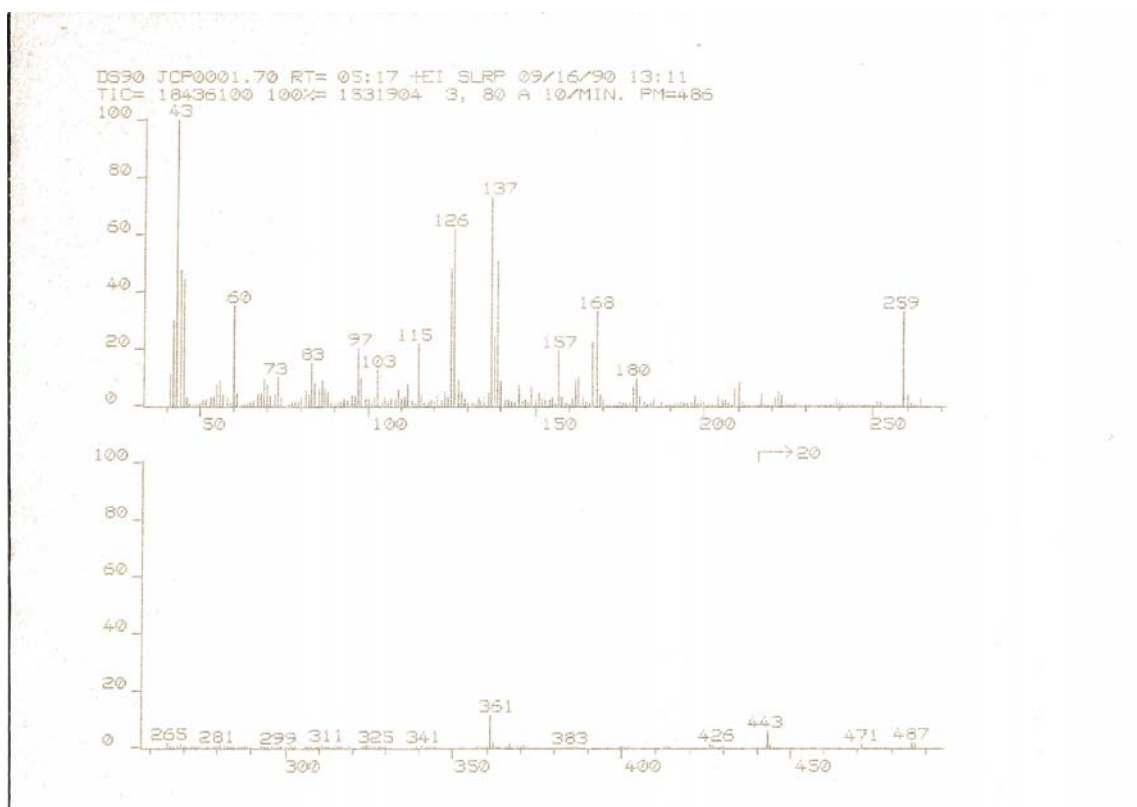

Figure S98. Mass spectrum (EI) of 13.

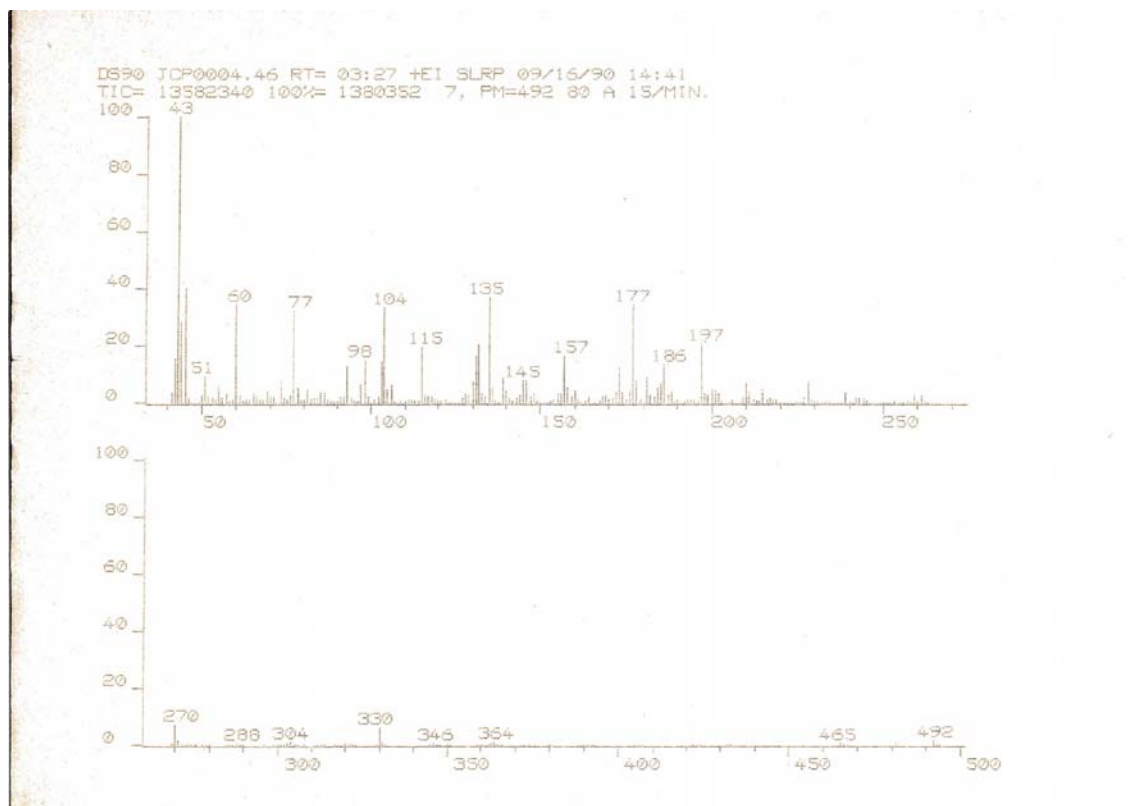

Figure S99. Mass spectrum (EI) of 17.

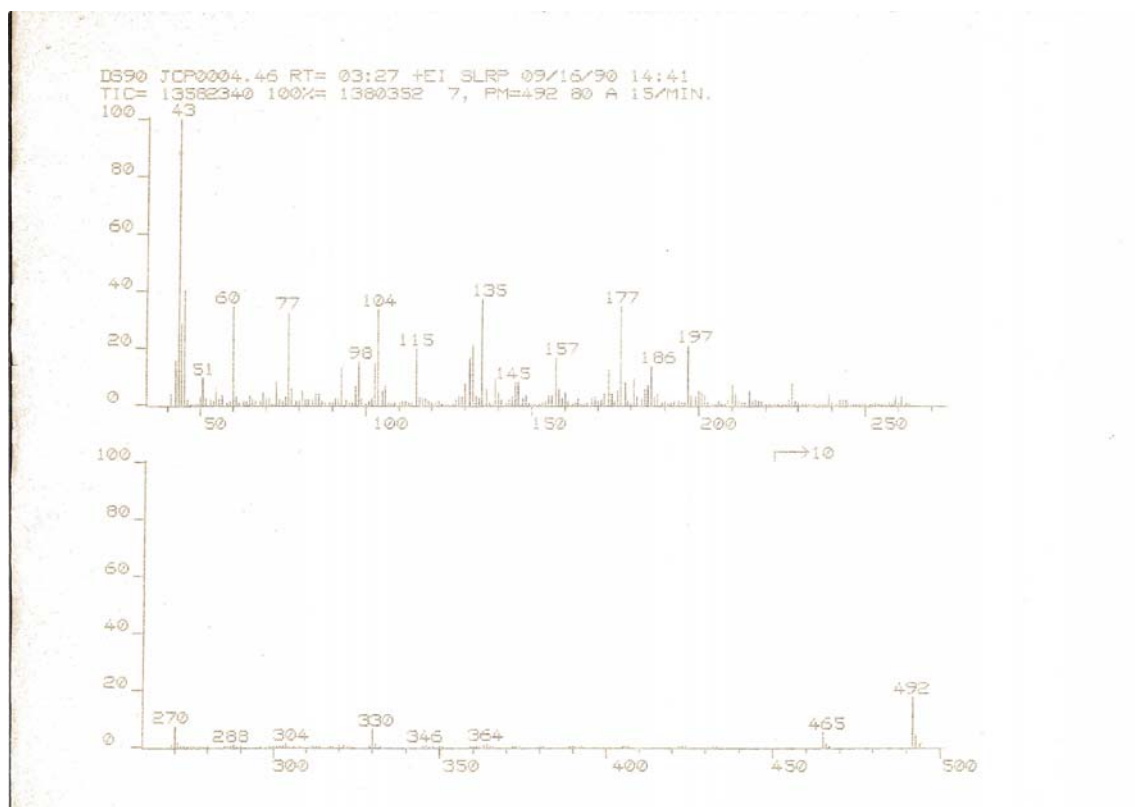

**Figure S100.** Mass spectrum (EI) of **17**.

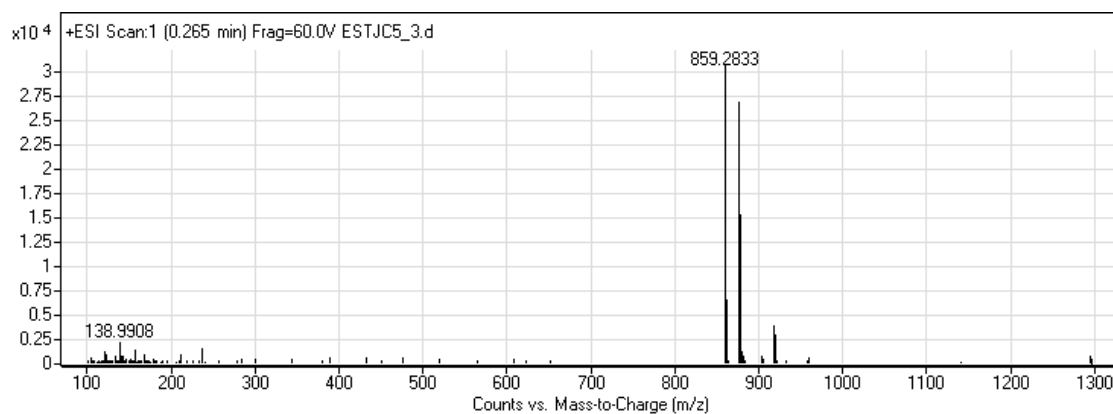

**Figure S101.** Mass spectrum of **18**.

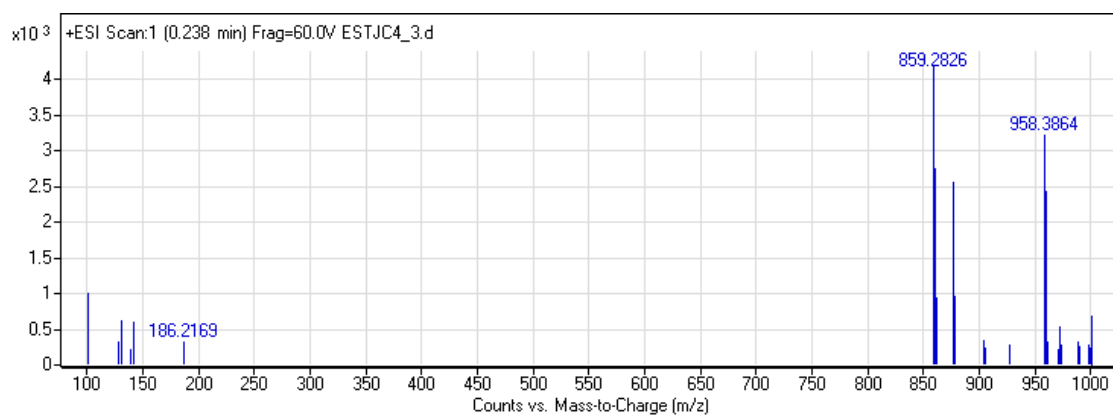

Figure S102. Mass spectrum of 20.

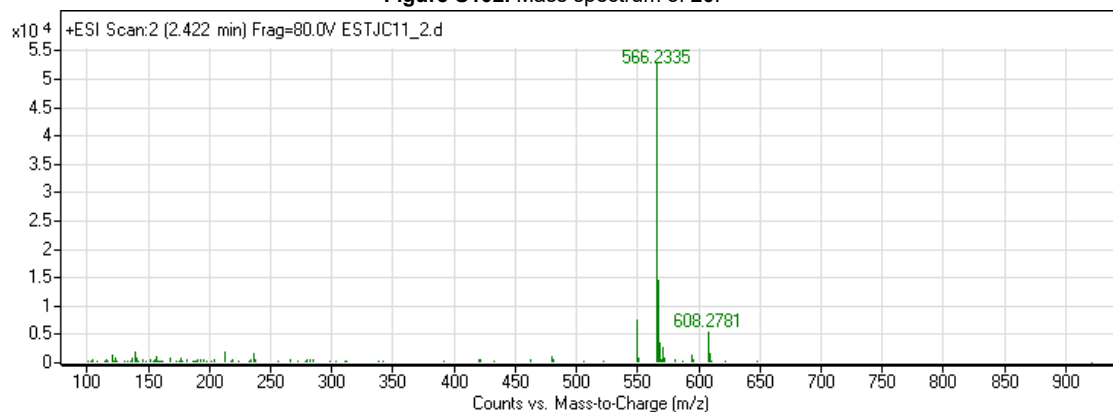

Figure S103. Mass spectrum of 37

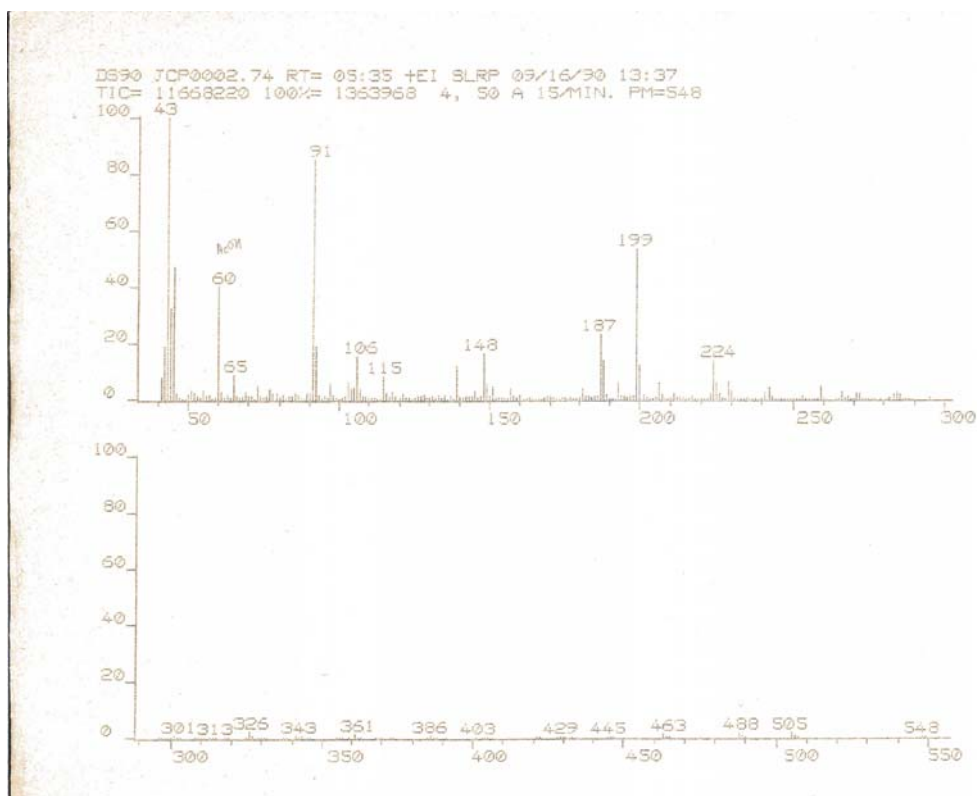

Figure S104. Mass spectrum (EI) of 37.

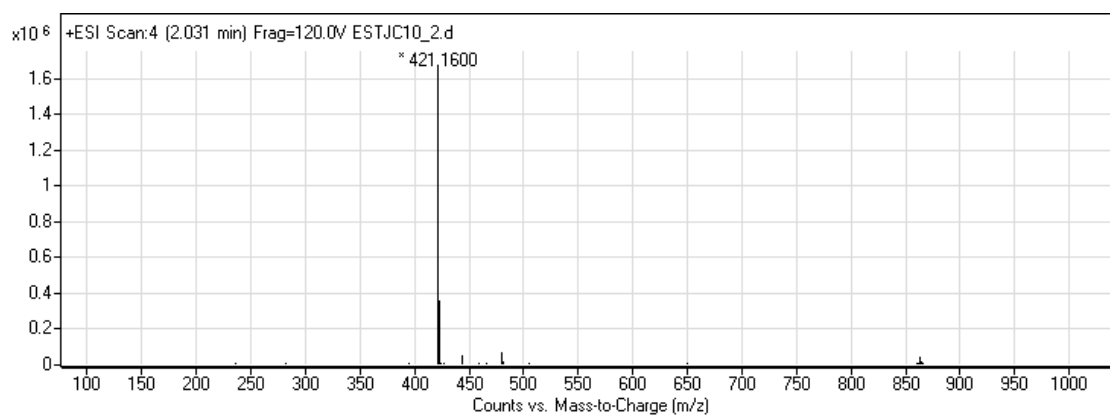

**Figure S105.** Mass spectrum of **42**.

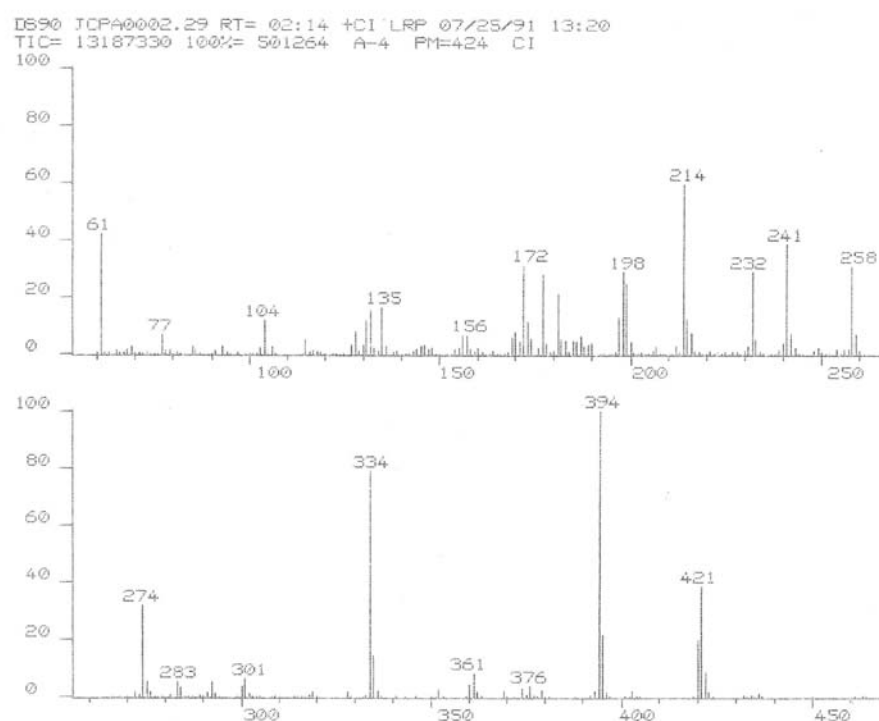

**Figure S106.** Mass spectrum (EI) of **42**.

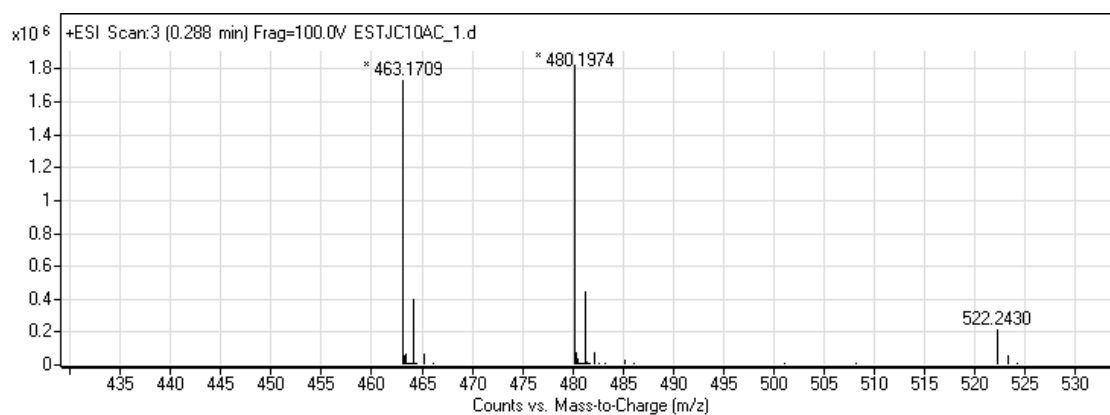

**Figure S107.** Mass spectrum of **43**.

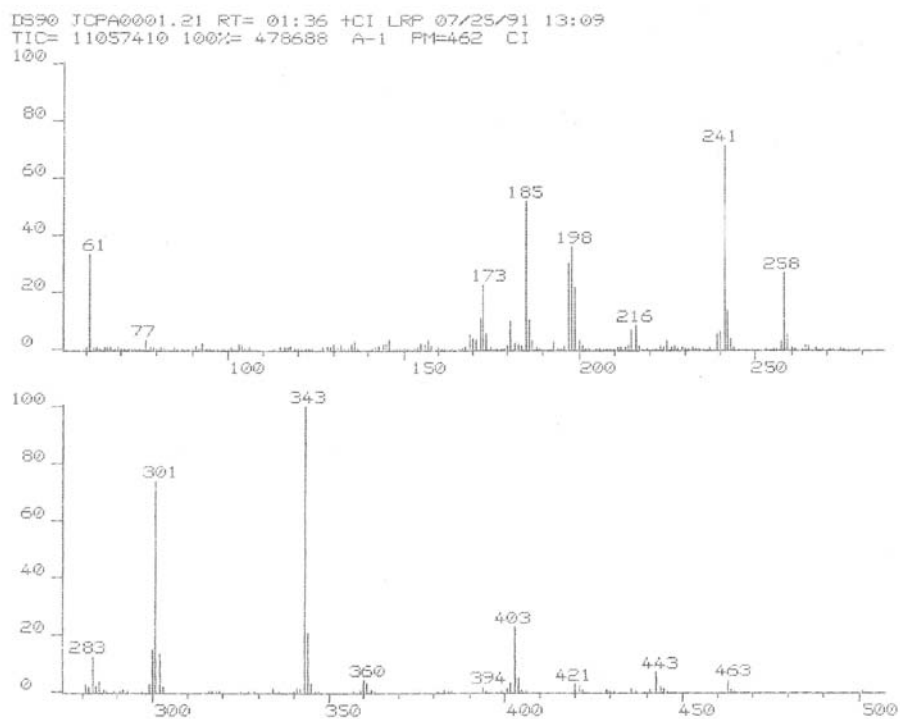

**Figure S108.** Mass spectrum (EI) of **43**.

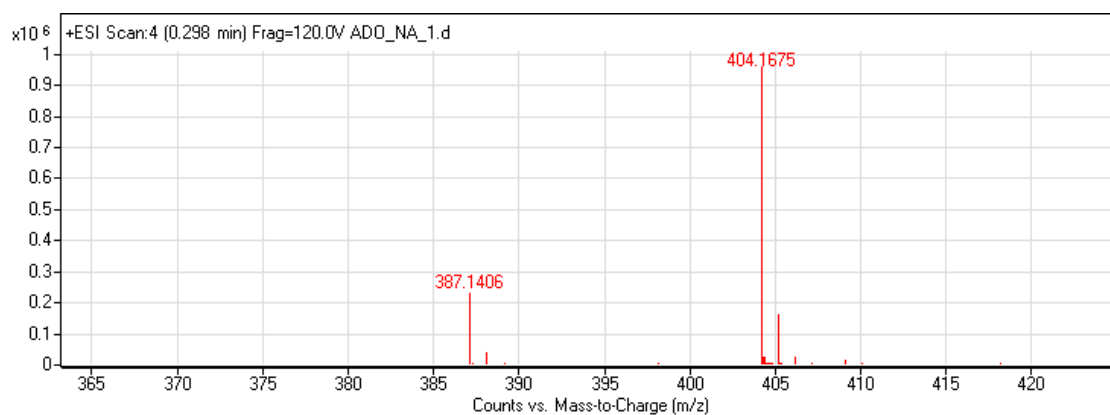

**Figure S109.** Mass spectrum of **47**.

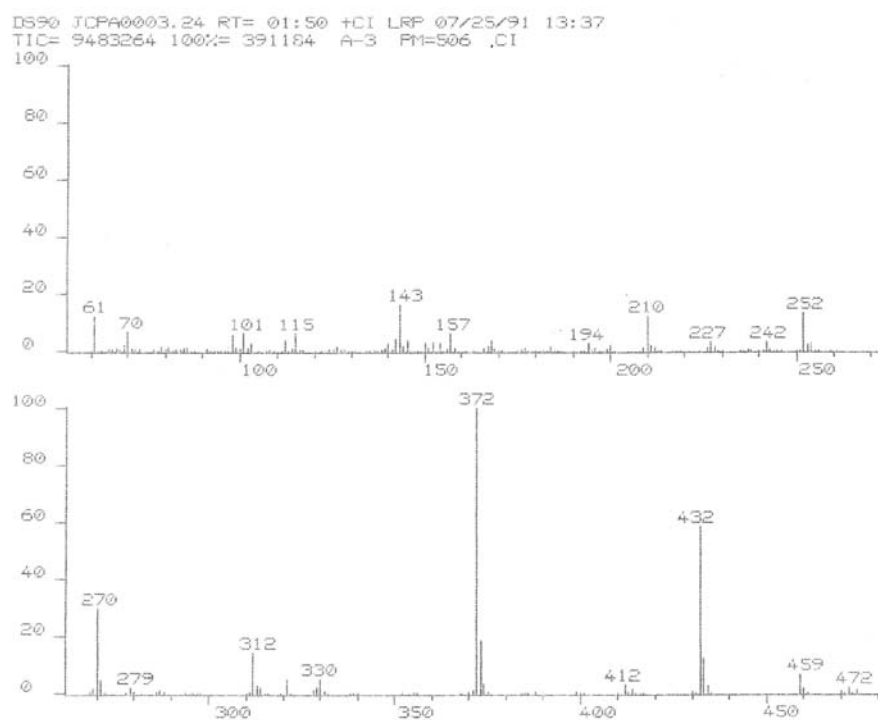

**Figure S110.** Mass spectrum (EI) of **58**.

### Structure 13 A<sub>1</sub>G<sup>+</sup>Z (M06-2X, Gas Phase)

Energy (Hartrees): = -1755.1525901  
No imaginary frequencies

Standard orientation:

| Center<br>Number | Atomic<br>Number | Atomic<br>Type | Coordinates (Angstroms) |           |           |
|------------------|------------------|----------------|-------------------------|-----------|-----------|
|                  |                  |                | X                       | Y         | Z         |
| 1                | 6                | 0              | 3.189721                | 1.650763  | -0.244558 |
| 2                | 1                | 0              | 2.737969                | 2.440834  | -0.846097 |
| 3                | 1                | 0              | 3.315478                | 1.983199  | 0.786914  |
| 4                | 6                | 0              | 2.315620                | 0.406248  | -0.283086 |
| 5                | 1                | 0              | 2.474921                | -0.104293 | -1.235837 |
| 6                | 6                | 0              | 0.844192                | 0.753099  | -0.165541 |
| 7                | 1                | 0              | 0.538950                | 1.271784  | -1.074457 |
| 8                | 6                | 0              | -0.038903               | -0.478999 | 0.029917  |
| 9                | 1                | 0              | 0.253576                | -1.018881 | 0.932404  |
| 10               | 6                | 0              | -1.498428               | -0.058720 | 0.145118  |
| 11               | 1                | 0              | -1.647951               | 0.386680  | 1.130323  |
| 12               | 6                | 0              | -2.505680               | -1.204885 | -0.081752 |
| 13               | 1                | 0              | -2.419276               | -1.521295 | -1.123517 |
| 14               | 6                | 0              | -2.203275               | -2.345970 | 0.794032  |
| 15               | 7                | 0              | -1.966782               | -3.215881 | 1.504909  |
| 16               | 8                | 0              | 4.458853                | 1.380894  | -0.840242 |
| 17               | 8                | 0              | 2.661597                | -0.475690 | 0.784392  |
| 18               | 8                | 0              | 0.605219                | 1.602829  | 0.964288  |
| 19               | 8                | 0              | 0.154506                | -1.317471 | -1.109264 |
| 20               | 8                | 0              | -1.778717               | 0.913859  | -0.855446 |
| 21               | 6                | 0              | 5.430754                | 0.889262  | -0.042260 |
| 22               | 6                | 0              | 3.521246                | -1.482600 | 0.507229  |
| 23               | 6                | 0              | 0.800577                | -2.506506 | -0.916940 |
| 24               | 6                | 0              | 0.188016                | 2.871521  | 0.726777  |
| 25               | 6                | 0              | -2.553450               | 1.971842  | -0.524337 |
| 26               | 6                | 0              | 6.618557                | 0.468789  | -0.855011 |
| 27               | 6                | 0              | 3.821939                | -2.273435 | 1.738969  |
| 28               | 6                | 0              | 1.149975                | -3.143333 | -2.226721 |
| 29               | 6                | 0              | -2.851346               | 2.794100  | -1.737755 |
| 30               | 1                | 0              | 7.482534                | 0.360271  | -0.204565 |
| 31               | 1                | 0              | 6.371612                | -0.496217 | -1.304558 |
| 32               | 1                | 0              | 6.811744                | 1.182114  | -1.654408 |
| 33               | 1                | 0              | 1.176391                | -4.223181 | -2.101389 |
| 34               | 1                | 0              | 0.457286                | -2.848897 | -3.011829 |
| 35               | 1                | 0              | 2.155344                | -2.798373 | -2.485228 |
| 36               | 1                | 0              | 2.885610                | -2.636332 | 2.163377  |
| 37               | 1                | 0              | 4.472681                | -3.104845 | 1.482855  |
| 38               | 1                | 0              | 4.307273                | -1.611126 | 2.457931  |
| 39               | 1                | 0              | -3.506401               | 3.617763  | -1.467042 |
| 40               | 1                | 0              | -1.908741               | 3.175811  | -2.133669 |
| 41               | 1                | 0              | -3.311537               | 2.150758  | -2.490513 |
| 42               | 6                | 0              | -0.190991               | 3.557749  | 2.003605  |
| 43               | 1                | 0              | 0.459046                | 3.247246  | 2.819407  |
| 44               | 1                | 0              | -0.157170               | 4.634170  | 1.855938  |
| 45               | 1                | 0              | -1.217044               | 3.260841  | 2.236732  |
| 46               | 7                | 0              | -3.865759               | -0.734713 | 0.122235  |
| 47               | 6                | 0              | -4.572537               | -0.351239 | -0.997613 |
| 48               | 6                | 0              | -5.889829               | 0.354642  | -0.756918 |
| 49               | 1                | 0              | -6.392871               | 0.438805  | -1.716570 |
| 50               | 1                | 0              | -6.528823               | -0.168482 | -0.046551 |
| 51               | 1                | 0              | -5.693645               | 1.356158  | -0.362793 |
| 52               | 8                | 0              | 5.322370                | 0.780724  | 1.147712  |
| 53               | 8                | 0              | 3.970336                | -1.673639 | -0.592255 |
| 54               | 8                | 0              | 0.111728                | 3.346041  | -0.372945 |
| 55               | 8                | 0              | 1.078132                | -2.935616 | 0.163530  |
| 56               | 8                | 0              | -2.929900               | 2.186172  | 0.597984  |
| 57               | 8                | 0              | -4.141803               | -0.521578 | -2.119919 |
| 58               | 6                | 0              | -4.334815               | -0.518307 | 1.494605  |
| 59               | 1                | 0              | -3.451723               | -0.416702 | 2.129277  |
| 60               | 1                | 0              | -4.846861               | 0.442723  | 1.548234  |
| 61               | 6                | 0              | -5.208807               | -1.656298 | 2.014285  |
| 62               | 1                | 0              | -5.534897               | -1.439635 | 3.033549  |
| 63               | 1                | 0              | -6.096051               | -1.790629 | 1.393111  |
| 64               | 1                | 0              | -4.653411               | -2.594641 | 2.024009  |

### Structure 13 A<sub>1</sub>G<sup>+</sup>Z (M06-2X, CHCl<sub>3</sub>)

Energy (Hartrees): = -1755.1837422  
No imaginary frequencies

Standard orientation:

| Center<br>Number | Atomic<br>Number | Atomic<br>Type | Coordinates (Angstroms) |          |           |
|------------------|------------------|----------------|-------------------------|----------|-----------|
|                  |                  |                | X                       | Y        | Z         |
| 1                | 6                | 0              | 3.225785                | 1.577620 | -0.378356 |

|    |   |   |           |           |           |
|----|---|---|-----------|-----------|-----------|
| 2  | 1 | 0 | 2.808616  | 2.312859  | -1.067614 |
| 3  | 1 | 0 | 3.312479  | 2.006757  | 0.620544  |
| 4  | 6 | 0 | 2.337038  | 0.343959  | -0.348317 |
| 5  | 1 | 0 | 2.487021  | -0.224859 | -1.269230 |
| 6  | 6 | 0 | 0.871920  | 0.728941  | -0.244497 |
| 7  | 1 | 0 | 0.579260  | 1.238517  | -1.162877 |
| 8  | 6 | 0 | -0.040045 | -0.478401 | -0.023210 |
| 9  | 1 | 0 | 0.271389  | -1.030290 | 0.865172  |
| 10 | 6 | 0 | -1.483585 | -0.029028 | 0.147934  |
| 11 | 1 | 0 | -1.581814 | 0.451513  | 1.122106  |
| 12 | 6 | 0 | -2.510581 | -1.174624 | 0.010477  |
| 13 | 1 | 0 | -2.441437 | -1.567506 | -1.006223 |
| 14 | 6 | 0 | -2.198108 | -2.265076 | 0.945421  |
| 15 | 7 | 0 | -1.932579 | -3.102276 | 1.684441  |
| 16 | 8 | 0 | 4.519618  | 1.254683  | -0.895029 |
| 17 | 8 | 0 | 2.656179  | -0.479859 | 0.776206  |
| 18 | 8 | 0 | 0.669449  | 1.601727  | 0.874043  |
| 19 | 8 | 0 | 0.071966  | -1.315085 | -1.175629 |
| 20 | 8 | 0 | -1.803386 | 0.902254  | -0.879997 |
| 21 | 6 | 0 | 5.463746  | 0.851441  | -0.022880 |
| 22 | 6 | 0 | 3.508058  | -1.509450 | 0.582981  |
| 23 | 6 | 0 | 0.672322  | -2.528917 | -1.033701 |
| 24 | 6 | 0 | 0.270040  | 2.875696  | 0.633755  |
| 25 | 6 | 0 | -2.526656 | 1.998049  | -0.547852 |
| 26 | 6 | 0 | 6.701003  | 0.412361  | -0.742453 |
| 27 | 6 | 0 | 3.709214  | -2.277048 | 1.849363  |
| 28 | 6 | 0 | 0.771990  | -3.226082 | -2.353137 |
| 29 | 6 | 0 | -2.901743 | 2.766333  | -1.773257 |
| 30 | 1 | 0 | 7.512328  | 0.283566  | -0.030076 |
| 31 | 1 | 0 | 6.483803  | -0.540447 | -1.231444 |
| 32 | 1 | 0 | 6.971346  | 1.134926  | -1.512373 |
| 33 | 1 | 0 | 1.027114  | -4.270422 | -2.191054 |
| 34 | 1 | 0 | -0.162729 | -3.133172 | -2.905908 |
| 35 | 1 | 0 | 1.562352  | -2.744328 | -2.934738 |
| 36 | 1 | 0 | 2.741519  | -2.613364 | 2.223736  |
| 37 | 1 | 0 | 4.359282  | -3.127705 | 1.659709  |
| 38 | 1 | 0 | 4.158205  | -1.615804 | 2.593316  |
| 39 | 1 | 0 | -3.461010 | 3.655614  | -1.493152 |
| 40 | 1 | 0 | -1.994443 | 3.042770  | -2.312923 |
| 41 | 1 | 0 | -3.498672 | 2.122740  | -2.424231 |
| 42 | 6 | 0 | 0.002302  | 3.598525  | 1.915042  |
| 43 | 1 | 0 | 0.818533  | 3.436729  | 2.619310  |
| 44 | 1 | 0 | -0.132158 | 4.658233  | 1.712765  |
| 45 | 1 | 0 | -0.912661 | 3.190750  | 2.351449  |
| 46 | 7 | 0 | -3.859609 | -0.675107 | 0.200485  |
| 47 | 6 | 0 | -4.592520 | -0.401259 | -0.931277 |
| 48 | 6 | 0 | -5.886393 | 0.351363  | -0.733301 |
| 49 | 1 | 0 | -6.406963 | 0.374231  | -1.687763 |
| 50 | 1 | 0 | -6.527086 | -0.099960 | 0.024101  |
| 51 | 1 | 0 | -5.662874 | 1.376096  | -0.420950 |
| 52 | 8 | 0 | 5.303297  | 0.837871  | 1.168895  |
| 53 | 8 | 0 | 4.028337  | -1.739674 | -0.477193 |
| 54 | 8 | 0 | 0.142050  | 3.326322  | -0.472643 |
| 55 | 8 | 0 | 1.074325  | -2.942532 | 0.017359  |
| 56 | 8 | 0 | -2.808357 | 2.277996  | 0.587571  |
| 57 | 8 | 0 | -4.193738 | -0.701923 | -2.042674 |
| 58 | 6 | 0 | -4.312795 | -0.361496 | 1.561808  |
| 59 | 1 | 0 | -3.422060 | -0.211449 | 2.175344  |
| 60 | 1 | 0 | -4.833677 | 0.595811  | 1.550379  |
| 61 | 6 | 0 | -5.179647 | -1.458720 | 2.169257  |
| 62 | 1 | 0 | -5.492744 | -1.166394 | 3.174068  |
| 63 | 1 | 0 | -6.075117 | -1.635267 | 1.570056  |
| 64 | 1 | 0 | -4.628476 | -2.397816 | 2.243950  |

### Structure 13 A<sub>1</sub>G\*E (M06-2X, Gas Phase)

Energy (Hartrees): = -1755.1511944  
No imaginary frequencies

Standard orientation:

| Center<br>Number | Atomic<br>Number | Atomic<br>Type | Coordinates (Angstroms) |           |           |
|------------------|------------------|----------------|-------------------------|-----------|-----------|
|                  |                  |                | X                       | Y         | Z         |
| 1                | 6                | 0              | -3.220967               | 1.622364  | 0.299021  |
| 2                | 1                | 0              | -2.774262               | 2.418517  | 0.896416  |
| 3                | 1                | 0              | -3.402557               | 1.966832  | -0.720017 |
| 4                | 6                | 0              | -2.304481               | 0.409214  | 0.282786  |
| 5                | 1                | 0              | -2.426701               | -0.132759 | 1.222931  |
| 6                | 6                | 0              | -0.843719               | 0.796812  | 0.143564  |
| 7                | 1                | 0              | -0.523134               | 1.269867  | 1.072358  |
| 8                | 6                | 0              | 0.042156                | -0.416340 | -0.135934 |
| 9                | 1                | 0              | -0.267944               | -0.914634 | -1.056149 |
| 10               | 6                | 0              | 1.498457                | 0.000638  | -0.261199 |
| 11               | 1                | 0              | 1.623672                | 0.540566  | -1.200661 |
| 12               | 6                | 0              | 2.482150                | -1.195332 | -0.205584 |



|    |   |   |           |           |           |
|----|---|---|-----------|-----------|-----------|
| 13 | 1 | 0 | 2.225744  | -1.796026 | 0.666556  |
| 14 | 6 | 0 | 2.295955  | -2.046747 | -1.392405 |
| 15 | 7 | 0 | 2.151977  | -2.678756 | -2.339467 |
| 16 | 8 | 0 | -4.453323 | 1.294470  | 0.942880  |
| 17 | 8 | 0 | -2.648946 | -0.455139 | -0.801506 |
| 18 | 8 | 0 | -0.650148 | 1.710239  | -0.939938 |
| 19 | 8 | 0 | -0.138930 | -1.304599 | 0.971011  |
| 20 | 8 | 0 | 1.840446  | 0.856733  | 0.821527  |
| 21 | 6 | 0 | -5.433037 | 0.762007  | 0.181058  |
| 22 | 6 | 0 | -3.446891 | -1.512337 | -0.532240 |
| 23 | 6 | 0 | -0.705251 | -2.522411 | 0.715379  |
| 24 | 6 | 0 | -0.245179 | 2.972214  | -0.635005 |
| 25 | 6 | 0 | 2.538132  | 1.990874  | 0.522287  |
| 26 | 6 | 0 | -6.564650 | 0.279534  | 1.038222  |
| 27 | 6 | 0 | -3.776559 | -2.259175 | -1.783486 |
| 28 | 6 | 0 | -1.096010 | -3.208304 | 1.987973  |
| 29 | 6 | 0 | 3.016560  | 2.664687  | 1.767938  |
| 30 | 1 | 0 | -7.447236 | 0.126941  | 0.422652  |
| 31 | 1 | 0 | -6.250261 | -0.672510 | 1.473239  |
| 32 | 1 | 0 | -6.762594 | 0.979867  | 1.847835  |
| 33 | 1 | 0 | -1.103514 | -4.283637 | 1.827620  |
| 34 | 1 | 0 | -0.437604 | -2.931159 | 2.808707  |
| 35 | 1 | 0 | -2.113527 | -2.880383 | 2.220198  |
| 36 | 1 | 0 | -2.852306 | -2.519951 | -2.299172 |
| 37 | 1 | 0 | -4.340968 | -3.152687 | -1.531414 |
| 38 | 1 | 0 | -4.367246 | -1.599590 | -2.422110 |
| 39 | 1 | 0 | 3.256972  | 3.700281  | 1.542842  |
| 40 | 1 | 0 | 2.260103  | 2.599456  | 2.548110  |
| 41 | 1 | 0 | 3.921144  | 2.144932  | 2.099420  |
| 42 | 6 | 0 | 0.059008  | 3.750244  | -1.877308 |
| 43 | 1 | 0 | -0.623731 | 3.482235  | -2.681385 |
| 44 | 1 | 0 | 0.014428  | 4.813280  | -1.654570 |
| 45 | 1 | 0 | 1.077556  | 3.489948  | -2.176478 |
| 46 | 7 | 0 | 3.852568  | -0.748924 | -0.097714 |
| 47 | 6 | 0 | 4.467167  | -0.576467 | 1.124756  |
| 48 | 6 | 0 | 3.799149  | -1.167266 | 2.352151  |
| 49 | 1 | 0 | 4.451827  | -0.959871 | 3.196135  |
| 50 | 1 | 0 | 2.818999  | -0.719716 | 2.527472  |
| 51 | 1 | 0 | 3.678694  | -2.248654 | 2.252020  |
| 52 | 8 | 0 | -5.367452 | 0.664868  | -1.012977 |
| 53 | 8 | 0 | -3.826783 | -1.777069 | 0.578743  |
| 54 | 8 | 0 | -0.127689 | 3.368560  | 0.490882  |
| 55 | 8 | 0 | -0.885837 | -2.938809 | -0.390726 |
| 56 | 8 | 0 | 2.737963  | 2.348820  | -0.603592 |
| 57 | 8 | 0 | 5.519917  | 0.021855  | 1.206771  |
| 58 | 6 | 0 | 4.516089  | -0.186898 | -1.285230 |
| 59 | 1 | 0 | 3.750024  | -0.007321 | -2.042379 |
| 60 | 1 | 0 | 4.938995  | 0.778474  | -1.007725 |
| 61 | 6 | 0 | 5.596452  | -1.120367 | -1.813561 |
| 62 | 1 | 0 | 6.079199  | -0.678390 | -2.687138 |
| 63 | 1 | 0 | 6.353452  | -1.278926 | -1.044516 |
| 64 | 1 | 0 | 5.170021  | -2.082334 | -2.104229 |

### Structure 13 A<sub>1</sub>G<sup>+</sup>E (M06-2X, CHCl<sub>3</sub>)

Energy (Hartrees): = -1755.1825417  
No imaginary frequencies

Standard orientation:

| Center<br>Number | Atomic<br>Number | Atomic<br>Type | Coordinates (Angstroms) |           |           |
|------------------|------------------|----------------|-------------------------|-----------|-----------|
|                  |                  |                | X                       | Y         | Z         |
| 1                | 6                | 0              | -3.238597               | 1.527747  | 0.435855  |
| 2                | 1                | 0              | -2.822450               | 2.253888  | 1.135183  |
| 3                | 1                | 0              | -3.360635               | 1.982330  | -0.548016 |
| 4                | 6                | 0              | -2.323500               | 0.316590  | 0.348377  |
| 5                | 1                | 0              | -2.448778               | -0.288519 | 1.249620  |
| 6                | 6                | 0              | -0.866648               | 0.732179  | 0.240335  |
| 7                | 1                | 0              | -0.570323               | 1.209710  | 1.174902  |
| 8                | 6                | 0              | 0.056315                | -0.455633 | -0.034257 |
| 9                | 1                | 0              | -0.260205               | -0.984962 | -0.934445 |
| 10               | 6                | 0              | 1.494982                | 0.007611  | -0.211749 |
| 11               | 1                | 0              | 1.584529                | 0.495065  | -1.182697 |
| 12               | 6                | 0              | 2.525405                | -1.140548 | -0.095679 |
| 13               | 1                | 0              | 2.373371                | -1.627563 | 0.867567  |
| 14               | 6                | 0              | 2.266564                | -2.158881 | -1.128423 |
| 15               | 7                | 0              | 2.054126                | -2.935444 | -1.946288 |
| 16               | 8                | 0              | -4.511191               | 1.158463  | 0.974285  |
| 17               | 8                | 0              | -2.643099               | -0.472448 | -0.801180 |
| 18               | 8                | 0              | -0.691727               | 1.651077  | -0.843421 |
| 19               | 8                | 0              | -0.041918               | -1.328706 | 1.094468  |
| 20               | 8                | 0              | 1.829219                | 0.930537  | 0.818531  |
| 21               | 6                | 0              | -5.468588               | 0.762077  | 0.113055  |
| 22               | 6                | 0              | -3.469550               | -1.527238 | -0.632800 |
| 23               | 6                | 0              | -0.617732               | -2.550413 | 0.910305  |

|    |   |   |           |           |           |
|----|---|---|-----------|-----------|-----------|
| 24 | 6 | 0 | -0.335797 | 2.928525  | -0.553284 |
| 25 | 6 | 0 | 2.485900  | 2.066962  | 0.455611  |
| 26 | 6 | 0 | -6.677625 | 0.272962  | 0.847977  |
| 27 | 6 | 0 | -3.682086 | -2.246585 | -1.925172 |
| 28 | 6 | 0 | -0.741351 | -3.278889 | 2.210523  |
| 29 | 6 | 0 | 2.946845  | 2.823100  | 1.658341  |
| 30 | 1 | 0 | -7.510164 | 0.171425  | 0.155945  |
| 31 | 1 | 0 | -6.434273 | -0.702700 | 1.276132  |
| 32 | 1 | 0 | -6.930124 | 0.949246  | 1.664364  |
| 33 | 1 | 0 | -0.987805 | -4.320247 | 2.018731  |
| 34 | 1 | 0 | 0.181195  | -3.196154 | 2.785287  |
| 35 | 1 | 0 | -1.545510 | -2.814293 | 2.787055  |
| 36 | 1 | 0 | -2.718575 | -2.592091 | -2.303214 |
| 37 | 1 | 0 | -4.350181 | -3.089491 | -1.766873 |
| 38 | 1 | 0 | -4.109638 | -1.552623 | -2.651290 |
| 39 | 1 | 0 | 3.120459  | 3.862230  | 1.388449  |
| 40 | 1 | 0 | 2.219824  | 2.744657  | 2.465159  |
| 41 | 1 | 0 | 3.890575  | 2.378261  | 1.990424  |
| 42 | 6 | 0 | -0.146258 | 3.721275  | -1.806225 |
| 43 | 1 | 0 | -1.059403 | 3.686768  | -2.403011 |
| 44 | 1 | 0 | 0.105231  | 4.747893  | -1.552022 |
| 45 | 1 | 0 | 0.658992  | 3.270744  | -2.389273 |
| 46 | 7 | 0 | 3.881709  | -0.646080 | -0.183816 |
| 47 | 6 | 0 | 4.657576  | -0.411547 | 0.928067  |
| 48 | 6 | 0 | 4.136628  | -0.854748 | 2.277628  |
| 49 | 1 | 0 | 4.884627  | -0.579506 | 3.017412  |
| 50 | 1 | 0 | 3.188337  | -0.372927 | 2.522505  |
| 51 | 1 | 0 | 3.992847  | -1.937707 | 2.304474  |
| 52 | 8 | 0 | -5.337127 | 0.787492  | -1.081979 |
| 53 | 8 | 0 | -3.957063 | -1.814137 | 0.429093  |
| 54 | 8 | 0 | -0.196771 | 3.330858  | 0.570141  |
| 55 | 8 | 0 | -0.981612 | -2.946210 | -0.160589 |
| 56 | 8 | 0 | 2.667674  | 2.371801  | -0.690816 |
| 57 | 8 | 0 | 5.740327  | 0.134190  | 0.814424  |
| 58 | 6 | 0 | 4.400227  | -0.220383 | -1.493018 |
| 59 | 1 | 0 | 3.551121  | -0.121181 | -2.171747 |
| 60 | 1 | 0 | 4.842075  | 0.768786  | -1.372904 |
| 61 | 6 | 0 | 5.418284  | -1.206124 | -2.049503 |
| 62 | 1 | 0 | 5.786315  | -0.854914 | -3.016044 |
| 63 | 1 | 0 | 6.266879  | -1.294139 | -1.369583 |
| 64 | 1 | 0 | 4.971195  | -2.192900 | -2.190788 |

### Structure 13 B<sub>1</sub>G<sup>+</sup>Z (M06-2X, Gas Phase)

Energy (Hartrees): = -1755.1479943  
No imaginary frequencies

| Standard orientation: |                  |                |                         |           |           |
|-----------------------|------------------|----------------|-------------------------|-----------|-----------|
| Center<br>Number      | Atomic<br>Number | Atomic<br>Type | Coordinates (Angstroms) |           |           |
|                       |                  |                | X                       | Y         | Z         |
| 1                     | 6                | 0              | 3.190226                | 1.579712  | -0.382641 |
| 2                     | 1                | 0              | 2.762887                | 2.321612  | -1.058401 |
| 3                     | 1                | 0              | 3.310422                | 2.001103  | 0.616418  |
| 4                     | 6                | 0              | 2.291057                | 0.353221  | -0.321482 |
| 5                     | 1                | 0              | 2.457214                | -0.246515 | -1.219817 |
| 6                     | 6                | 0              | 0.825815                | 0.738337  | -0.262597 |
| 7                     | 1                | 0              | 0.556688                | 1.202463  | -1.211943 |
| 8                     | 6                | 0              | -0.096598               | -0.452368 | -0.000533 |
| 9                     | 1                | 0              | 0.144966                | -0.915270 | 0.958570  |
| 10                    | 6                | 0              | -1.546234               | 0.004093  | 0.019506  |
| 11                    | 1                | 0              | -1.728448               | 0.570478  | 0.931086  |
| 12                    | 6                | 0              | -2.565761               | -1.140486 | -0.084380 |
| 13                    | 1                | 0              | -2.456543               | -1.562832 | -1.086781 |
| 14                    | 6                | 0              | -2.291357               | -2.240596 | 0.856635  |
| 15                    | 7                | 0              | -2.059747               | -3.145205 | 1.523825  |
| 16                    | 8                | 0              | 4.460909                | 1.231175  | -0.932738 |
| 17                    | 8                | 0              | 2.599779                | -0.429712 | 0.830405  |
| 18                    | 8                | 0              | 0.583327                | 1.665436  | 0.802338  |
| 19                    | 8                | 0              | 0.113189                | -1.396918 | -1.054457 |
| 20                    | 8                | 0              | -1.796411               | 0.832886  | -1.124503 |
| 21                    | 6                | 0              | 5.412053                | 0.798501  | -0.076918 |
| 22                    | 6                | 0              | 3.443244                | -1.473865 | 0.668169  |
| 23                    | 6                | 0              | 0.749721                | -2.564478 | -0.737284 |
| 24                    | 6                | 0              | 0.223826                | 2.929660  | 0.477431  |
| 25                    | 6                | 0              | -2.448165               | 2.005452  | -0.927579 |
| 26                    | 6                | 0              | 6.593297                | 0.262105  | -0.828418 |
| 27                    | 6                | 0              | 3.691288                | -2.158811 | 1.972749  |
| 28                    | 6                | 0              | 1.113321                | -3.332424 | -1.971918 |
| 29                    | 6                | 0              | -2.552638               | 2.776958  | -2.208348 |
| 30                    | 1                | 0              | 7.447318                | 0.192088  | -0.159773 |
| 31                    | 1                | 0              | 6.316795                | -0.735016 | -1.180258 |
| 32                    | 1                | 0              | 6.818081                | 0.883467  | -1.693798 |
| 33                    | 1                | 0              | 1.066363                | -4.397196 | -1.754486 |
| 34                    | 1                | 0              | 0.476836                | -3.068944 | -2.813383 |

|    |   |   |           |           |           |
|----|---|---|-----------|-----------|-----------|
| 35 | 1 | 0 | 2.149822  | -3.073908 | -2.207152 |
| 36 | 1 | 0 | 2.739287  | -2.525465 | 2.358493  |
| 37 | 1 | 0 | 4.383450  | -2.982329 | 1.820693  |
| 38 | 1 | 0 | 4.103390  | -1.431123 | 2.673201  |
| 39 | 1 | 0 | -3.324714 | 3.535737  | -2.108597 |
| 40 | 1 | 0 | -1.586348 | 3.261432  | -2.367803 |
| 41 | 1 | 0 | -2.754016 | 2.113375  | -3.047963 |
| 42 | 6 | 0 | -0.198416 | 3.694891  | 1.692746  |
| 43 | 1 | 0 | 0.415846  | 3.427086  | 2.550561  |
| 44 | 1 | 0 | -0.149245 | 4.760346  | 1.483476  |
| 45 | 1 | 0 | -1.234092 | 3.414827  | 1.904211  |
| 46 | 7 | 0 | -3.916436 | -0.615874 | 0.028441  |
| 47 | 6 | 0 | -4.295810 | -0.111814 | 1.255424  |
| 48 | 6 | 0 | -5.670721 | 0.506372  | 1.354663  |
| 49 | 1 | 0 | -5.843210 | 0.737732  | 2.402177  |
| 50 | 1 | 0 | -5.695975 | 1.431986  | 0.774678  |
| 51 | 1 | 0 | -6.453658 | -0.160718 | 0.990859  |
| 52 | 8 | 0 | 5.289774  | 0.815062  | 1.116194  |
| 53 | 8 | 0 | 3.914277  | -1.773250 | -0.397824 |
| 54 | 8 | 0 | 0.222385  | 3.342858  | -0.651152 |
| 55 | 8 | 0 | 1.013194  | -2.887478 | 0.381951  |
| 56 | 8 | 0 | -2.846007 | 2.368938  | 0.144194  |
| 57 | 8 | 0 | -3.535014 | -0.148219 | 2.197686  |
| 58 | 6 | 0 | -4.776391 | -0.704267 | -1.147430 |
| 59 | 1 | 0 | -5.546353 | 0.062689  | -1.072211 |
| 60 | 1 | 0 | -4.171002 | -0.449171 | -2.022297 |
| 61 | 6 | 0 | -5.401333 | -2.086205 | -1.310390 |
| 62 | 1 | 0 | -6.021327 | -2.126922 | -2.208043 |
| 63 | 1 | 0 | -4.628203 | -2.853842 | -1.393876 |
| 64 | 1 | 0 | -6.020705 | -2.329772 | -0.444890 |

### Structure 13 B<sub>1</sub>G<sup>+</sup>Z (M06-2X, CHCl<sub>3</sub>)

Energy (Hartrees): -1755.1821906

No imaginary frequencies

Standard orientation:

| Center<br>Number | Atomic<br>Number | Atomic<br>Type | Coordinates (Angstroms) |           |           |
|------------------|------------------|----------------|-------------------------|-----------|-----------|
|                  |                  |                | X                       | Y         | Z         |
| 1                | 6                | 0              | 3.228364                | 1.478007  | -0.477055 |
| 2                | 1                | 0              | 2.833733                | 2.173455  | -1.218423 |
| 3                | 1                | 0              | 3.318394                | 1.974540  | 0.490277  |
| 4                | 6                | 0              | 2.309555                | 0.270663  | -0.362833 |
| 5                | 1                | 0              | 2.469803                | -0.382487 | -1.224537 |
| 6                | 6                | 0              | 0.852670                | 0.697762  | -0.334261 |
| 7                | 1                | 0              | 0.605520                | 1.150491  | -1.295181 |
| 8                | 6                | 0              | -0.104027               | -0.462226 | -0.056977 |
| 9                | 1                | 0              | 0.156016                | -0.949699 | 0.884443  |
| 10               | 6                | 0              | -1.538896               | 0.035423  | 0.019472  |
| 11               | 1                | 0              | -1.674454               | 0.595631  | 0.942633  |
| 12               | 6                | 0              | -2.587382               | -1.087487 | -0.062354 |
| 13               | 1                | 0              | -2.512020               | -1.524606 | -1.061507 |
| 14               | 6                | 0              | -2.302734               | -2.184140 | 0.881338  |
| 15               | 7                | 0              | -2.048700               | -3.078845 | 1.554002  |
| 16               | 8                | 0              | 4.518707                | 1.091895  | -0.958106 |
| 17               | 8                | 0              | 2.577504                | -0.453314 | 0.839897  |
| 18               | 8                | 0              | 0.641755                | 1.649978  | 0.715261  |
| 19               | 8                | 0              | 0.019579                | -1.394954 | -1.135560 |
| 20               | 8                | 0              | -1.805354               | 0.878754  | -1.106030 |
| 21               | 6                | 0              | 5.450164                | 0.740589  | -0.050197 |
| 22               | 6                | 0              | 3.419907                | -1.505387 | 0.767977  |
| 23               | 6                | 0              | 0.623393                | -2.590006 | -0.887862 |
| 24               | 6                | 0              | 0.337826                | 2.926363  | 0.378964  |
| 25               | 6                | 0              | -2.417918               | 2.067426  | -0.876948 |
| 26               | 6                | 0              | 6.685438                | 0.230801  | -0.724811 |
| 27               | 6                | 0              | 3.564498                | -2.159506 | 2.103596  |
| 28               | 6                | 0              | 0.754097                | -3.394218 | -2.142625 |
| 29               | 6                | 0              | -2.606084               | 2.822809  | -2.154287 |
| 30               | 1                | 0              | 7.496884                | 0.167341  | -0.003709 |
| 31               | 1                | 0              | 6.462611                | -0.765179 | -1.115825 |
| 32               | 1                | 0              | 6.958296                | 0.872412  | -1.562455 |
| 33               | 1                | 0              | 0.823166                | -4.449258 | -1.886987 |
| 34               | 1                | 0              | -0.076400               | -3.207495 | -2.821077 |
| 35               | 1                | 0              | 1.681558                | -3.090926 | -2.636783 |
| 36               | 1                | 0              | 2.581185                | -2.472193 | 2.457770  |
| 37               | 1                | 0              | 4.228529                | -3.016281 | 2.020534  |
| 38               | 1                | 0              | 3.970343                | -1.432145 | 2.809680  |
| 39               | 1                | 0              | -3.208092               | 3.708248  | -1.965108 |
| 40               | 1                | 0              | -1.621324               | 3.117717  | -2.522851 |
| 41               | 1                | 0              | -3.076960               | 2.188133  | -2.905777 |
| 42               | 6                | 0              | 0.052081                | 3.743660  | 1.597222  |
| 43               | 1                | 0              | 0.849823                | 3.615673  | 2.329776  |
| 44               | 1                | 0              | -0.052972               | 4.788905  | 1.317592  |
| 45               | 1                | 0              | -0.878447               | 3.382431  | 2.041353  |

|    |   |   |           |           |           |
|----|---|---|-----------|-----------|-----------|
| 46 | 7 | 0 | -3.926887 | -0.546026 | 0.081682  |
| 47 | 6 | 0 | -4.294264 | -0.079312 | 1.319099  |
| 48 | 6 | 0 | -5.675713 | 0.508309  | 1.455584  |
| 49 | 1 | 0 | -5.838547 | 0.728628  | 2.507820  |
| 50 | 1 | 0 | -5.745433 | 1.434637  | 0.880409  |
| 51 | 1 | 0 | -6.445343 | -0.179248 | 1.100655  |
| 52 | 8 | 0 | 5.280022  | 0.816110  | 1.137690  |
| 53 | 8 | 0 | 3.974245  | -1.833370 | -0.248464 |
| 54 | 8 | 0 | 0.298788  | 3.312349  | -0.759381 |
| 55 | 8 | 0 | 1.016743  | -2.915929 | 0.195825  |
| 56 | 8 | 0 | -2.731593 | 2.442362  | 0.219792  |
| 57 | 8 | 0 | -3.515871 | -0.133776 | 2.255029  |
| 58 | 6 | 0 | -4.814545 | -0.627613 | -1.080452 |
| 59 | 1 | 0 | -5.577657 | 0.143786  | -0.987229 |
| 60 | 1 | 0 | -4.222404 | -0.377603 | -1.964306 |
| 61 | 6 | 0 | -5.446217 | -2.005248 | -1.229744 |
| 62 | 1 | 0 | -6.090380 | -2.035343 | -2.111159 |
| 63 | 1 | 0 | -4.678191 | -2.774932 | -1.344139 |
| 64 | 1 | 0 | -6.045617 | -2.251385 | -0.350344 |

### Structure 13 B<sub>1</sub>G<sup>+</sup>E (M06-2X, Gas Phase)

Energy (Hartrees): =-1755.1465438  
No imaginary frequencies

Standard orientation:

| Center<br>Number | Atomic<br>Number | Atomic<br>Type | Coordinates (Angstroms) |           |           |
|------------------|------------------|----------------|-------------------------|-----------|-----------|
|                  |                  |                | X                       | Y         | Z         |
| 1                | 6                | 0              | 3.249372                | 1.498185  | -0.405234 |
| 2                | 1                | 0              | 2.853388                | 2.256609  | -1.081493 |
| 3                | 1                | 0              | 3.408478                | 1.919965  | 0.588494  |
| 4                | 6                | 0              | 2.286998                | 0.322471  | -0.322596 |
| 5                | 1                | 0              | 2.408239                | -0.289391 | -1.219591 |
| 6                | 6                | 0              | 0.840205                | 0.773027  | -0.244739 |
| 7                | 1                | 0              | 0.576051                | 1.233360  | -1.197364 |
| 8                | 6                | 0              | -0.115288               | -0.385663 | 0.042551  |
| 9                | 1                | 0              | 0.124412                | -0.846904 | 1.003009  |
| 10               | 6                | 0              | -1.558997               | 0.104031  | 0.067353  |
| 11               | 1                | 0              | -1.704296               | 0.690743  | 0.972952  |
| 12               | 6                | 0              | -2.587090               | -1.038516 | -0.021023 |
| 13               | 1                | 0              | -2.374742               | -1.547487 | -0.965119 |
| 14               | 6                | 0              | -2.373584               | -2.048898 | 1.031940  |
| 15               | 7                | 0              | -2.213025               | -2.838218 | 1.850211  |
| 16               | 8                | 0              | 4.490151                | 1.075750  | -0.971905 |
| 17               | 8                | 0              | 2.573986                | -0.471049 | 0.829161  |
| 18               | 8                | 0              | 0.650813                | 1.725153  | 0.808094  |
| 19               | 8                | 0              | 0.070896                | -1.343993 | -1.001415 |
| 20               | 8                | 0              | -1.804207               | 0.926116  | -1.071786 |
| 21               | 6                | 0              | 5.426671                | 0.587268  | -0.130459 |
| 22               | 6                | 0              | 3.351802                | -1.563814 | 0.656705  |
| 23               | 6                | 0              | 0.641822                | -2.542425 | -0.664655 |
| 24               | 6                | 0              | 0.411074                | 3.013454  | 0.457245  |
| 25               | 6                | 0              | -2.329262               | 2.158943  | -0.854087 |
| 26               | 6                | 0              | 6.568548                | -0.006735 | -0.899047 |
| 27               | 6                | 0              | 3.620770                | -2.234130 | 1.964246  |
| 28               | 6                | 0              | 1.028744                | -3.314077 | -1.888273 |
| 29               | 6                | 0              | -2.489134               | 2.912307  | -2.136856 |
| 30               | 1                | 0              | 7.422090                | -0.135489 | -0.238723 |
| 31               | 1                | 0              | 6.232885                | -0.981101 | -1.262979 |
| 32               | 1                | 0              | 6.822312                | 0.612807  | -1.757726 |
| 33               | 1                | 0              | 0.982730                | -4.378202 | -1.668678 |
| 34               | 1                | 0              | 0.405118                | -3.054306 | -2.740792 |
| 35               | 1                | 0              | 2.067459                | -3.048671 | -2.106942 |
| 36               | 1                | 0              | 2.675042                | -2.417745 | 2.473619  |
| 37               | 1                | 0              | 4.150007                | -3.166494 | 1.788487  |
| 38               | 1                | 0              | 4.226998                | -1.557303 | 2.569631  |
| 39               | 1                | 0              | -3.236250               | 3.690491  | -2.002465 |
| 40               | 1                | 0              | -1.523050               | 3.375139  | -2.354843 |
| 41               | 1                | 0              | -2.754834               | 2.243937  | -2.953475 |
| 42               | 6                | 0              | 0.102322                | 3.850014  | 1.659478  |
| 43               | 1                | 0              | 0.701287                | 3.537684  | 2.513044  |
| 44               | 1                | 0              | 0.267920                | 4.897258  | 1.419970  |
| 45               | 1                | 0              | -0.954061               | 3.697550  | 1.894136  |
| 46               | 7                | 0              | -3.954893               | -0.563019 | -0.110569 |
| 47               | 6                | 0              | -4.705244               | -0.067655 | 0.948437  |
| 48               | 6                | 0              | -3.996598               | 0.322941  | 2.226382  |
| 49               | 1                | 0              | -4.758126               | 0.394346  | 2.999035  |
| 50               | 1                | 0              | -3.225087               | -0.376419 | 2.545028  |
| 51               | 1                | 0              | -3.550637               | 1.309285  | 2.079081  |
| 52               | 8                | 0              | 5.318652                | 0.602564  | 1.064341  |
| 53               | 8                | 0              | 3.763723                | -1.907672 | -0.420501 |
| 54               | 8                | 0              | 0.425013                | 3.395157  | -0.681324 |
| 55               | 8                | 0              | 0.833186                | -2.880267 | 0.464997  |
| 56               | 8                | 0              | -2.575845               | 2.580462  | 0.242044  |

|    |   |   |           |           |           |
|----|---|---|-----------|-----------|-----------|
| 57 | 8 | 0 | -5.897289 | 0.099057  | 0.818313  |
| 58 | 6 | 0 | -4.683435 | -0.923445 | -1.332046 |
| 59 | 1 | 0 | -5.497039 | -0.208906 | -1.439609 |
| 60 | 1 | 0 | -3.998068 | -0.790043 | -2.173017 |
| 61 | 6 | 0 | -5.231124 | -2.344557 | -1.275846 |
| 62 | 1 | 0 | -5.754521 | -2.592530 | -2.201060 |
| 63 | 1 | 0 | -4.429630 | -3.074548 | -1.131897 |
| 64 | 1 | 0 | -5.932711 | -2.431534 | -0.445226 |

### Structure 13 A<sub>1</sub>G-Z (M06-2X, Gas Phase)

Energy (Hartrees): = - 1755.1499916

No imaginary frequencies

Standard orientation:

| Center<br>Number | Atomic<br>Number | Atomic<br>Type | Coordinates (Angstroms) |           |           |
|------------------|------------------|----------------|-------------------------|-----------|-----------|
|                  |                  |                | X                       | Y         | Z         |
| 1                | 6                | 0              | 3.242478                | 1.263626  | 0.109783  |
| 2                | 1                | 0              | 3.091142                | 2.204596  | -0.419945 |
| 3                | 1                | 0              | 3.296960                | 1.436513  | 1.185536  |
| 4                | 6                | 0              | 2.108274                | 0.302630  | -0.207375 |
| 5                | 1                | 0              | 2.281775                | -0.130991 | -1.193903 |
| 6                | 6                | 0              | 0.753998                | 0.990577  | -0.222822 |
| 7                | 1                | 0              | 0.710035                | 1.620243  | -1.112942 |
| 8                | 6                | 0              | -0.390602               | -0.022148 | -0.263600 |
| 9                | 1                | 0              | -0.362701               | -0.665864 | 0.616509  |
| 10               | 6                | 0              | -1.731551               | 0.688289  | -0.325017 |
| 11               | 1                | 0              | -1.859836               | 1.268161  | 0.588849  |
| 12               | 6                | 0              | -2.973832               | -0.222487 | -0.421155 |
| 13               | 1                | 0              | -3.827288               | 0.462858  | -0.475779 |
| 14               | 6                | 0              | -2.978777               | -1.022702 | -1.654131 |
| 15               | 7                | 0              | -3.001021               | -1.650580 | -2.615031 |
| 16               | 8                | 0              | 4.478416                | 0.733195  | -0.373676 |
| 17               | 8                | 0              | 2.068945                | -0.750358 | 0.759480  |
| 18               | 8                | 0              | 0.556811                | 1.801694  | 0.937566  |
| 19               | 8                | 0              | -0.164610               | -0.796385 | -1.442253 |
| 20               | 8                | 0              | -1.737707               | 1.565948  | -1.449196 |
| 21               | 6                | 0              | 5.166631                | -0.092875 | 0.441192  |
| 22               | 6                | 0              | 2.674211                | -1.915028 | 0.438931  |
| 23               | 6                | 0              | 0.011890                | -2.133511 | -1.319432 |
| 24               | 6                | 0              | 0.570286                | 3.150194  | 0.766301  |
| 25               | 6                | 0              | -1.962884               | 2.886778  | -1.205094 |
| 26               | 6                | 0              | 6.305792                | -0.732701 | -0.294637 |
| 27               | 6                | 0              | 2.620915                | -2.871240 | 1.587024  |
| 28               | 6                | 0              | 0.346545                | -2.742849 | -2.643451 |
| 29               | 6                | 0              | -1.738419               | 3.704220  | -2.439180 |
| 30               | 1                | 0              | 7.023613                | -1.128615 | 0.419242  |
| 31               | 1                | 0              | 5.880963                | -1.551277 | -0.881566 |
| 32               | 1                | 0              | 6.773375                | -0.025475 | -0.977381 |
| 33               | 1                | 0              | 0.330260                | -3.825467 | -2.553925 |
| 34               | 1                | 0              | -0.368260               | -2.399022 | -3.391329 |
| 35               | 1                | 0              | 1.347553                | -2.410952 | -2.927796 |
| 36               | 1                | 0              | 1.591160                | -2.962414 | 1.931503  |
| 37               | 1                | 0              | 3.007576                | -3.836039 | 1.270508  |
| 38               | 1                | 0              | 3.232054                | -2.458324 | 2.392220  |
| 39               | 1                | 0              | -2.325519               | 4.617352  | -2.377895 |
| 40               | 1                | 0              | -0.677021               | 3.968363  | -2.448522 |
| 41               | 1                | 0              | -1.973538               | 3.136735  | -3.337005 |
| 42               | 6                | 0              | 0.126999                | 3.851211  | 2.011172  |
| 43               | 1                | 0              | 0.517560                | 3.351605  | 2.896069  |
| 44               | 1                | 0              | 0.440965                | 4.890950  | 1.970257  |
| 45               | 1                | 0              | -0.964892               | 3.801780  | 2.031409  |
| 46               | 7                | 0              | -3.120791               | -1.056193 | 0.773563  |
| 47               | 6                | 0              | -3.592163               | -0.381856 | 1.882216  |
| 48               | 6                | 0              | -3.782873               | -1.181099 | 3.153742  |
| 49               | 1                | 0              | -4.177945               | -0.498656 | 3.901432  |
| 50               | 1                | 0              | -4.471645               | -2.015263 | 3.018361  |
| 51               | 1                | 0              | -2.827028               | -1.581636 | 3.497990  |
| 52               | 8                | 0              | 4.865973                | -0.304057 | 1.583890  |
| 53               | 8                | 0              | 3.190751                | -2.113924 | -0.628953 |
| 54               | 8                | 0              | 0.874295                | 3.672915  | -0.270378 |
| 55               | 8                | 0              | -0.085953               | -2.716587 | -0.272985 |
| 56               | 8                | 0              | -2.252112               | 3.312741  | -0.124580 |
| 57               | 8                | 0              | -3.802487               | 0.813235  | 1.844969  |
| 58               | 6                | 0              | -3.129033               | -2.522259 | 0.687386  |
| 59               | 1                | 0              | -2.382973               | -2.824343 | -0.043855 |
| 60               | 1                | 0              | -2.776585               | -2.912421 | 1.641731  |
| 61               | 6                | 0              | -4.496928               | -3.095532 | 0.327878  |
| 62               | 1                | 0              | -4.450441               | -4.186113 | 0.308658  |
| 63               | 1                | 0              | -5.257884               | -2.797300 | 1.052171  |
| 64               | 1                | 0              | -4.813064               | -2.756336 | -0.659792 |

### Structure 13 A<sub>1</sub>G<sup>-</sup>Z (M06-2X, CHCl<sub>3</sub>)

Energy (Hartrees): = -1755.1802673  
No imaginary frequencies

Standard orientation:

| Center<br>Number | Atomic<br>Number | Atomic<br>Type | Coordinates (Angstroms) |           |           |
|------------------|------------------|----------------|-------------------------|-----------|-----------|
|                  |                  |                | X                       | Y         | Z         |
| 1                | 6                | 0              | 3.235010                | 1.248901  | -0.018582 |
| 2                | 1                | 0              | 3.070072                | 2.157783  | -0.597898 |
| 3                | 1                | 0              | 3.300603                | 1.488211  | 1.043498  |
| 4                | 6                | 0              | 2.101994                | 0.267224  | -0.270721 |
| 5                | 1                | 0              | 2.247155                | -0.196443 | -1.248537 |
| 6                | 6                | 0              | 0.750094                | 0.961316  | -0.259418 |
| 7                | 1                | 0              | 0.697423                | 1.612550  | -1.133165 |
| 8                | 6                | 0              | -0.414171               | -0.032360 | -0.298228 |
| 9                | 1                | 0              | -0.358980               | -0.717330 | 0.548881  |
| 10               | 6                | 0              | -1.740931               | 0.706710  | -0.265073 |
| 11               | 1                | 0              | -1.807688               | 1.257771  | 0.671939  |
| 12               | 6                | 0              | -3.008982               | -0.173927 | -0.322458 |
| 13               | 1                | 0              | -3.851313               | 0.524524  | -0.264371 |
| 14               | 6                | 0              | -3.130320               | -0.868564 | -1.611911 |
| 15               | 7                | 0              | -3.245344               | -1.400328 | -2.622584 |
| 16               | 8                | 0              | 4.477512                | 0.715412  | -0.487477 |
| 17               | 8                | 0              | 2.085950                | -0.748892 | 0.736971  |
| 18               | 8                | 0              | 0.591088                | 1.741499  | 0.929293  |
| 19               | 8                | 0              | -0.279317               | -0.752970 | -1.524975 |
| 20               | 8                | 0              | -1.785252               | 1.614678  | -1.364177 |
| 21               | 6                | 0              | 5.199387                | -0.043108 | 0.358486  |
| 22               | 6                | 0              | 2.707450                | -1.915039 | 0.464384  |
| 23               | 6                | 0              | -0.007452               | -2.079401 | -1.479774 |
| 24               | 6                | 0              | 0.557714                | 3.093463  | 0.803488  |
| 25               | 6                | 0              | -2.071609               | 2.917084  | -1.095662 |
| 26               | 6                | 0              | 6.396472                | -0.618960 | -0.332561 |
| 27               | 6                | 0              | 2.615630                | -2.852139 | 1.625029  |
| 28               | 6                | 0              | 0.138180                | -2.633723 | -2.859880 |
| 29               | 6                | 0              | -1.977177               | 3.747006  | -2.334819 |
| 30               | 1                | 0              | 7.074661                | -1.045117 | 0.402801  |
| 31               | 1                | 0              | 6.047984                | -1.402135 | -1.010312 |
| 32               | 1                | 0              | 6.898296                | 0.145215  | -0.925833 |
| 33               | 1                | 0              | 0.365167                | -3.695177 | -2.803288 |
| 34               | 1                | 0              | -0.790964               | -2.467923 | -3.409509 |
| 35               | 1                | 0              | 0.937934                | -2.103313 | -3.379939 |
| 36               | 1                | 0              | 1.589175                | -2.894104 | 1.988376  |
| 37               | 1                | 0              | 2.957836                | -3.839130 | 1.323632  |
| 38               | 1                | 0              | 3.251660                | -2.464881 | 2.424711  |
| 39               | 1                | 0              | -2.453527               | 4.709530  | -2.165201 |
| 40               | 1                | 0              | -0.917219               | 3.901778  | -2.552965 |
| 41               | 1                | 0              | -2.429768               | 3.228452  | -3.179285 |
| 42               | 6                | 0              | 0.200630                | 3.738765  | 2.102817  |
| 43               | 1                | 0              | 0.787666                | 3.307616  | 2.913886  |
| 44               | 1                | 0              | 0.361721                | 4.811595  | 2.033240  |
| 45               | 1                | 0              | -0.855469               | 3.537567  | 2.299512  |
| 46               | 7                | 0              | -3.082774               | -1.095323 | 0.809907  |
| 47               | 6                | 0              | -3.443121               | -0.517064 | 2.003988  |
| 48               | 6                | 0              | -3.533456               | -1.416163 | 3.213225  |
| 49               | 1                | 0              | -3.881879               | -0.810059 | 4.046011  |
| 50               | 1                | 0              | -4.217686               | -2.250497 | 3.056716  |
| 51               | 1                | 0              | -2.548491               | -1.823864 | 3.452613  |
| 52               | 8                | 0              | 4.892484                | -0.232451 | 1.506108  |
| 53               | 8                | 0              | 3.271825                | -2.131203 | -0.576302 |
| 54               | 8                | 0              | 0.775122                | 3.657365  | -0.234828 |
| 55               | 8                | 0              | 0.089636                | -2.696838 | -0.452411 |
| 56               | 8                | 0              | -2.330207               | 3.313141  | 0.006433  |
| 57               | 8                | 0              | -3.641449               | 0.683894  | 2.081150  |
| 58               | 6                | 0              | -3.036412               | -2.551845 | 0.616209  |
| 59               | 1                | 0              | -2.342767               | -2.764049 | -0.195465 |
| 60               | 1                | 0              | -2.594762               | -2.995111 | 1.507895  |
| 61               | 6                | 0              | -4.402615               | -3.160002 | 0.320255  |
| 62               | 1                | 0              | -4.307575               | -4.241736 | 0.202862  |
| 63               | 1                | 0              | -5.107819               | -2.963517 | 1.130566  |
| 64               | 1                | 0              | -4.821660               | -2.756782 | -0.603686 |

### Structure 13 A<sub>1</sub>G<sup>-</sup>E (M06-2X, Gas Phase)

Energy (Hartrees): = -1755.1482904  
No imaginary frequencies

Standard orientation:

| Center<br>Number | Atomic<br>Number | Atomic<br>Type | Coordinates (Angstroms) |   |   |
|------------------|------------------|----------------|-------------------------|---|---|
|                  |                  |                | X                       | Y | Z |

|    |   |   |           |           |           |
|----|---|---|-----------|-----------|-----------|
| 1  | 6 | 0 | -3.186157 | 1.450259  | -0.121254 |
| 2  | 1 | 0 | -2.965466 | 2.361432  | 0.436770  |
| 3  | 1 | 0 | -3.191736 | 1.652361  | -1.193240 |
| 4  | 6 | 0 | -2.148720 | 0.383685  | 0.198655  |
| 5  | 1 | 0 | -2.385416 | -0.053950 | 1.171444  |
| 6  | 6 | 0 | -0.748318 | 0.967339  | 0.259507  |
| 7  | 1 | 0 | -0.678960 | 1.596501  | 1.147800  |
| 8  | 6 | 0 | 0.330012  | -0.117177 | 0.335995  |
| 9  | 1 | 0 | 0.245985  | -0.796930 | -0.514583 |
| 10 | 6 | 0 | 1.708940  | 0.522984  | 0.351250  |
| 11 | 1 | 0 | 1.824915  | 1.075479  | -0.581851 |
| 12 | 6 | 0 | 2.932332  | -0.419855 | 0.424914  |
| 13 | 1 | 0 | 3.783257  | 0.233247  | 0.633376  |
| 14 | 6 | 0 | 2.869101  | -1.351454 | 1.566931  |
| 15 | 7 | 0 | 2.842192  | -2.089431 | 2.445503  |
| 16 | 8 | 0 | -4.478438 | 1.028270  | 0.312892  |
| 17 | 8 | 0 | -2.165039 | -0.642701 | -0.792167 |
| 18 | 8 | 0 | -0.476123 | 1.762440  | -0.900507 |
| 19 | 8 | 0 | 0.093540  | -0.812856 | 1.557563  |
| 20 | 8 | 0 | 1.758688  | 1.431520  | 1.451144  |
| 21 | 6 | 0 | -5.215242 | 0.295361  | -0.550394 |
| 22 | 6 | 0 | -2.899477 | -1.750571 | -0.528787 |
| 23 | 6 | 0 | -0.285043 | -2.118319 | 1.509242  |
| 24 | 6 | 0 | -0.293026 | 3.094861  | -0.719157 |
| 25 | 6 | 0 | 2.250929  | 2.671019  | 1.202662  |
| 26 | 6 | 0 | -6.431325 | -0.257030 | 0.129469  |
| 27 | 6 | 0 | -2.844429 | -2.702389 | -1.679825 |
| 28 | 6 | 0 | -0.524797 | -2.644773 | 2.887989  |
| 29 | 6 | 0 | 2.093833  | 3.567042  | 2.389602  |
| 30 | 1 | 0 | -7.155130 | -0.570355 | -0.618441 |
| 31 | 1 | 0 | -6.101153 | -1.123779 | 0.708054  |
| 32 | 1 | 0 | -6.858830 | 0.473096  | 0.814559  |
| 33 | 1 | 0 | -0.916801 | -3.655437 | 2.819355  |
| 34 | 1 | 0 | 0.424387  | -2.636251 | 3.427744  |
| 35 | 1 | 0 | -1.226366 | -1.994535 | 3.410947  |
| 36 | 1 | 0 | -1.802309 | -2.922047 | -1.912258 |
| 37 | 1 | 0 | -3.379019 | -3.611930 | -1.420584 |
| 38 | 1 | 0 | -3.306620 | -2.218394 | -2.542169 |
| 39 | 1 | 0 | 2.810824  | 4.381355  | 2.323039  |
| 40 | 1 | 0 | 1.080857  | 3.975285  | 2.342920  |
| 41 | 1 | 0 | 2.207253  | 3.009058  | 3.316907  |
| 42 | 6 | 0 | 0.185311  | 3.750979  | -1.976806 |
| 43 | 1 | 0 | -0.221964 | 3.257870  | -2.856954 |
| 44 | 1 | 0 | -0.075244 | 4.806288  | -1.953674 |
| 45 | 1 | 0 | 1.274926  | 3.656812  | -1.987511 |
| 46 | 7 | 0 | 3.170231  | -1.128330 | -0.816130 |
| 47 | 6 | 0 | 4.003412  | -0.625638 | -1.799677 |
| 48 | 6 | 0 | 4.707328  | 0.691103  | -1.537084 |
| 49 | 1 | 0 | 5.196540  | 0.973956  | -2.465249 |
| 50 | 1 | 0 | 4.033269  | 1.488937  | -1.219545 |
| 51 | 1 | 0 | 5.473000  | 0.563457  | -0.766589 |
| 52 | 8 | 0 | -4.897326 | 0.095527  | -1.689801 |
| 53 | 8 | 0 | -3.510214 | -1.900469 | 0.494359  |
| 54 | 8 | 0 | -0.462480 | 3.643241  | 0.335489  |
| 55 | 8 | 0 | -0.390740 | -2.731745 | 0.484351  |
| 56 | 8 | 0 | 2.713670  | 2.984475  | 0.138920  |
| 57 | 8 | 0 | 4.166051  | -1.235005 | -2.833051 |
| 58 | 6 | 0 | 2.561693  | -2.446603 | -1.058220 |
| 59 | 1 | 0 | 1.710761  | -2.559856 | -0.388233 |
| 60 | 1 | 0 | 2.184751  | -2.445767 | -2.081585 |
| 61 | 6 | 0 | 3.555136  | -3.586280 | -0.863665 |
| 62 | 1 | 0 | 3.062232  | -4.541451 | -1.054299 |
| 63 | 1 | 0 | 4.385289  | -3.479605 | -1.561771 |
| 64 | 1 | 0 | 3.938142  | -3.599341 | 0.158408  |

### Structure 13 A<sub>1</sub>G-E (M06-2X, CHCl<sub>3</sub>)

Energy (Hartrees): = -1755.1789547  
No imaginary frequencies

| Standard orientation: |                  |                |                         |           |           |
|-----------------------|------------------|----------------|-------------------------|-----------|-----------|
| Center<br>Number      | Atomic<br>Number | Atomic<br>Type | Coordinates (Angstroms) |           |           |
|                       |                  |                | X                       | Y         | Z         |
| 1                     | 6                | 0              | -3.201792               | 1.341580  | 0.057207  |
| 2                     | 1                | 0              | -3.006998               | 2.199649  | 0.702139  |
| 3                     | 1                | 0              | -3.201629               | 1.652116  | -0.988395 |
| 4                     | 6                | 0              | -2.136828               | 0.279761  | 0.288818  |
| 5                     | 1                | 0              | -2.331747               | -0.223151 | 1.239466  |
| 6                     | 6                | 0              | -0.755660               | 0.912792  | 0.334660  |
| 7                     | 1                | 0              | -0.695428               | 1.545495  | 1.221227  |
| 8                     | 6                | 0              | 0.373234                | -0.122923 | 0.387261  |
| 9                     | 1                | 0              | 0.273613                | -0.836006 | -0.433270 |
| 10                    | 6                | 0              | 1.721349                | 0.573887  | 0.304320  |

|    |   |   |           |           |           |
|----|---|---|-----------|-----------|-----------|
| 11 | 1 | 0 | 1.757023  | 1.108782  | -0.645023 |
| 12 | 6 | 0 | 2.984109  | -0.318371 | 0.324836  |
| 13 | 1 | 0 | 3.829227  | 0.370561  | 0.401837  |
| 14 | 6 | 0 | 3.070238  | -1.157678 | 1.533856  |
| 15 | 7 | 0 | 3.165222  | -1.824230 | 2.463220  |
| 16 | 8 | 0 | -4.494962 | 0.862263  | 0.431660  |
| 17 | 8 | 0 | -2.140562 | -0.682245 | -0.767881 |
| 18 | 8 | 0 | -0.549765 | 1.710255  | -0.836750 |
| 19 | 8 | 0 | 0.258136  | -0.784888 | 1.646861  |
| 20 | 8 | 0 | 1.799644  | 1.500492  | 1.385437  |
| 21 | 6 | 0 | -5.229980 | 0.235229  | -0.507010 |
| 22 | 6 | 0 | -2.858902 | -1.812175 | -0.589119 |
| 23 | 6 | 0 | -0.167632 | -2.073159 | 1.677682  |
| 24 | 6 | 0 | -0.415626 | 3.052288  | -0.682013 |
| 25 | 6 | 0 | 2.244470  | 2.752362  | 1.103816  |
| 26 | 6 | 0 | -6.489588 | -0.317051 | 0.083503  |
| 27 | 6 | 0 | -2.721482 | -2.718568 | -1.769555 |
| 28 | 6 | 0 | -0.223789 | -2.573244 | 3.084621  |
| 29 | 6 | 0 | 2.160892  | 3.633448  | 2.305921  |
| 30 | 1 | 0 | -7.184463 | -0.575245 | -0.712035 |
| 31 | 1 | 0 | -6.224178 | -1.217396 | 0.643780  |
| 32 | 1 | 0 | -6.935754 | 0.396353  | 0.775778  |
| 33 | 1 | 0 | -0.599420 | -3.593040 | 3.092596  |
| 34 | 1 | 0 | 0.780262  | -2.531631 | 3.512608  |
| 35 | 1 | 0 | -0.870141 | -1.924005 | 3.677722  |
| 36 | 1 | 0 | -1.665372 | -2.888568 | -1.981778 |
| 37 | 1 | 0 | -3.226020 | -3.659928 | -1.566813 |
| 38 | 1 | 0 | -3.173593 | -2.229731 | -2.635503 |
| 39 | 1 | 0 | 2.690057  | 4.563372  | 2.113764  |
| 40 | 1 | 0 | 1.104989  | 3.842634  | 2.493953  |
| 41 | 1 | 0 | 2.570149  | 3.123738  | 3.178185  |
| 42 | 6 | 0 | -0.073623 | 3.705302  | -1.981980 |
| 43 | 1 | 0 | -0.723745 | 3.334527  | -2.774656 |
| 44 | 1 | 0 | -0.158713 | 4.784377  | -1.880250 |
| 45 | 1 | 0 | 0.957453  | 3.442603  | -2.233367 |
| 46 | 7 | 0 | 3.125860  | -1.120586 | -0.876427 |
| 47 | 6 | 0 | 3.797360  | -0.651072 | -1.984605 |
| 48 | 6 | 0 | 4.439438  | 0.715618  | -1.911378 |
| 49 | 1 | 0 | 4.781785  | 0.964066  | -2.913121 |
| 50 | 1 | 0 | 3.762764  | 1.495455  | -1.556871 |
| 51 | 1 | 0 | 5.305122  | 0.687724  | -1.243335 |
| 52 | 8 | 0 | -4.887863 | 0.127590  | -1.654884 |
| 53 | 8 | 0 | -3.526632 | -2.018195 | 0.389211  |
| 54 | 8 | 0 | -0.541496 | 3.603872  | 0.378113  |
| 55 | 8 | 0 | -0.442388 | -2.695940 | 0.687775  |
| 56 | 8 | 0 | 2.623029  | 3.072911  | 0.008887  |
| 57 | 8 | 0 | 3.876574  | -1.336678 | -2.986560 |
| 58 | 6 | 0 | 2.586458  | -2.488658 | -0.936824 |
| 59 | 1 | 0 | 1.826692  | -2.592566 | -0.162967 |
| 60 | 1 | 0 | 2.091464  | -2.606262 | -1.901462 |
| 61 | 6 | 0 | 3.669720  | -3.545020 | -0.761584 |
| 62 | 1 | 0 | 3.227271  | -4.541610 | -0.824797 |
| 63 | 1 | 0 | 4.420373  | -3.451695 | -1.547501 |
| 64 | 1 | 0 | 4.157453  | -3.448484 | 0.211013  |

### Structure 13 B<sub>1</sub>G<sup>-</sup>Z (M06-2X, Gas Phase)

Energy (Hartrees): = -1755.146382  
No imaginary frequencies

Standard orientation:

| Center<br>Number | Atomic<br>Number | Atomic<br>Type | Coordinates (Angstroms) |           |           |
|------------------|------------------|----------------|-------------------------|-----------|-----------|
|                  |                  |                | X                       | Y         | Z         |
| 1                | 6                | 0              | -3.253446               | 1.266257  | 0.181607  |
| 2                | 1                | 0              | -3.035575               | 2.110425  | 0.837846  |
| 3                | 1                | 0              | -3.296530               | 1.598409  | -0.856758 |
| 4                | 6                | 0              | -2.163850               | 0.209281  | 0.332682  |
| 5                | 1                | 0              | -2.318277               | -0.343787 | 1.263400  |
| 6                | 6                | 0              | -0.798890               | 0.879687  | 0.353849  |
| 7                | 1                | 0              | -0.726398               | 1.521584  | 1.232408  |
| 8                | 6                | 0              | 0.385706                | -0.097280 | 0.363359  |
| 9                | 1                | 0              | 0.251967                | -0.862298 | -0.404291 |
| 10               | 6                | 0              | 1.670297                | 0.676821  | 0.108716  |
| 11               | 1                | 0              | 1.617183                | 1.098725  | -0.895380 |
| 12               | 6                | 0              | 3.004159                | -0.089188 | 0.169330  |
| 13               | 1                | 0              | 3.763724                | 0.690884  | 0.053095  |
| 14               | 6                | 0              | 3.300231                | -0.702730 | 1.476204  |
| 15               | 7                | 0              | 3.630645                | -1.111126 | 2.496383  |
| 16               | 8                | 0              | -4.522802               | 0.769565  | 0.591067  |
| 17               | 8                | 0              | -2.167645               | -0.705688 | -0.760762 |
| 18               | 8                | 0              | -0.667214               | 1.686946  | -0.830140 |
| 19               | 8                | 0              | 0.480595                | -0.703957 | 1.642194  |
| 20               | 8                | 0              | 1.733318                | 1.738766  | 1.063179  |
| 21               | 6                | 0              | -5.283655               | 0.178022  | -0.356083 |



|    |   |   |           |           |           |
|----|---|---|-----------|-----------|-----------|
| 22 | 6 | 0 | -2.877068 | -1.847975 | -0.608609 |
| 23 | 6 | 0 | 0.016259  | -1.979443 | 1.769050  |
| 24 | 6 | 0 | -0.600586 | 3.029421  | -0.689852 |
| 25 | 6 | 0 | 2.250207  | 2.913459  | 0.635232  |
| 26 | 6 | 0 | -6.484838 | -0.472018 | 0.261243  |
| 27 | 6 | 0 | -2.536897 | -2.824023 | -1.691954 |
| 28 | 6 | 0 | 0.580552  | -2.623566 | 2.993753  |
| 29 | 6 | 0 | 2.191661  | 3.952917  | 1.709673  |
| 30 | 1 | 0 | -7.229990 | -0.661687 | -0.507247 |
| 31 | 1 | 0 | -6.143763 | -1.417637 | 0.688796  |
| 32 | 1 | 0 | -6.889960 | 0.144940  | 1.061572  |
| 33 | 1 | 0 | -0.006966 | -3.502369 | 3.246149  |
| 34 | 1 | 0 | 1.607678  | -2.909453 | 2.753007  |
| 35 | 1 | 0 | 0.618056  | -1.915454 | 3.820382  |
| 36 | 1 | 0 | -1.550478 | -3.231678 | -1.458523 |
| 37 | 1 | 0 | -3.273036 | -3.623164 | -1.704608 |
| 38 | 1 | 0 | -2.494686 | -2.316069 | -2.654704 |
| 39 | 1 | 0 | 2.810100  | 4.800374  | 1.426094  |
| 40 | 1 | 0 | 1.149816  | 4.266154  | 1.805763  |
| 41 | 1 | 0 | 2.514493  | 3.528565  | 2.659632  |
| 42 | 6 | 0 | -0.329529 | 3.692655  | -2.007484 |
| 43 | 1 | 0 | -0.844454 | 3.173447  | -2.813888 |
| 44 | 1 | 0 | -0.630932 | 4.735732  | -1.952725 |
| 45 | 1 | 0 | 0.748034  | 3.639966  | -2.184987 |
| 46 | 7 | 0 | 3.180165  | -0.993359 | -0.958240 |
| 47 | 6 | 0 | 2.692216  | -2.274904 | -0.876706 |
| 48 | 6 | 0 | 2.983145  | -3.204787 | -2.034156 |
| 49 | 1 | 0 | 2.654074  | -4.196596 | -1.736389 |
| 50 | 1 | 0 | 2.423046  | -2.895487 | -2.919632 |
| 51 | 1 | 0 | 4.043365  | -3.227817 | -2.289225 |
| 52 | 8 | 0 | -5.001309 | 0.167561  | -1.521658 |
| 53 | 8 | 0 | -3.653971 | -2.027954 | 0.285548  |
| 54 | 8 | 0 | -0.713866 | 3.593276  | 0.364582  |
| 55 | 8 | 0 | -0.731342 | -2.477862 | 0.978876  |
| 56 | 8 | 0 | 2.673824  | 3.064326  | -0.480994 |
| 57 | 8 | 0 | 2.039036  | -2.634879 | 0.080910  |
| 58 | 6 | 0 | 4.019174  | -0.493204 | -2.049229 |
| 59 | 1 | 0 | 3.744486  | -1.012156 | -2.966377 |
| 60 | 1 | 0 | 3.765278  | 0.560122  | -2.200523 |
| 61 | 6 | 0 | 5.509157  | -0.645398 | -1.760071 |
| 62 | 1 | 0 | 6.101451  | -0.225186 | -2.574723 |
| 63 | 1 | 0 | 5.783104  | -0.124890 | -0.839584 |
| 64 | 1 | 0 | 5.776494  | -1.697048 | -1.641314 |

### Structure 13 B<sub>1</sub>G<sup>-</sup>Z (M06-2X, CHCl<sub>3</sub>)

Energy (Hartrees): = -1755.1803446  
No imaginary frequencies

Standard orientation:

| Center<br>Number | Atomic<br>Number | Atomic<br>Type | Coordinates (Angstroms) |           |           |
|------------------|------------------|----------------|-------------------------|-----------|-----------|
|                  |                  |                | X                       | Y         | Z         |
| 1                | 6                | 0              | -3.241745               | 1.194086  | 0.272713  |
| 2                | 1                | 0              | -3.055773               | 1.995611  | 0.988542  |
| 3                | 1                | 0              | -3.287942               | 1.600612  | -0.738765 |
| 4                | 6                | 0              | -2.127056               | 0.159733  | 0.371481  |
| 5                | 1                | 0              | -2.238069               | -0.411711 | 1.296512  |
| 6                | 6                | 0              | -0.775800               | 0.859509  | 0.361674  |
| 7                | 1                | 0              | -0.705257               | 1.501748  | 1.240346  |
| 8                | 6                | 0              | 0.428849                | -0.092375 | 0.353120  |
| 9                | 1                | 0              | 0.310757                | -0.856116 | -0.417773 |
| 10               | 6                | 0              | 1.699351                | 0.706835  | 0.098885  |
| 11               | 1                | 0              | 1.638982                | 1.131248  | -0.903213 |
| 12               | 6                | 0              | 3.043153                | -0.044680 | 0.153439  |
| 13               | 1                | 0              | 3.801029                | 0.736002  | 0.030076  |
| 14               | 6                | 0              | 3.348484                | -0.634844 | 1.470217  |
| 15               | 7                | 0              | 3.673846                | -1.011170 | 2.504472  |
| 16               | 8                | 0              | -4.507010               | 0.641487  | 0.636500  |
| 17               | 8                | 0              | -2.146918               | -0.732683 | -0.744150 |
| 18               | 8                | 0              | -0.684194               | 1.661680  | -0.826887 |
| 19               | 8                | 0              | 0.538918                | -0.703589 | 1.632417  |
| 20               | 8                | 0              | 1.752707                | 1.760240  | 1.063870  |
| 21               | 6                | 0              | -5.251206               | 0.086561  | -0.338575 |
| 22               | 6                | 0              | -2.826117               | -1.890327 | -0.610904 |
| 23               | 6                | 0              | 0.093119                | -1.979176 | 1.766827  |
| 24               | 6                | 0              | -0.714280               | 3.009188  | -0.704655 |
| 25               | 6                | 0              | 2.099395                | 2.995402  | 0.625874  |
| 26               | 6                | 0              | -6.471000               | -0.568204 | 0.230950  |
| 27               | 6                | 0              | -2.543991               | -2.803580 | -1.762006 |
| 28               | 6                | 0              | 0.641209                | -2.607049 | 3.006584  |
| 29               | 6                | 0              | 2.076133                | 3.985069  | 1.744280  |
| 30               | 1                | 0              | -7.153217               | -0.835361 | -0.572508 |
| 31               | 1                | 0              | -6.148396               | -1.468699 | 0.758694  |
| 32               | 1                | 0              | -6.957213               | 0.091918  | 0.949389  |
| 33               | 1                | 0              | 0.003248                | -3.433516 | 3.312417  |

|    |   |   |           |           |           |
|----|---|---|-----------|-----------|-----------|
| 34 | 1 | 0 | 1.635249  | -2.986126 | 2.754251  |
| 35 | 1 | 0 | 0.749476  | -1.873463 | 3.804368  |
| 36 | 1 | 0 | -1.514532 | -3.158124 | -1.670340 |
| 37 | 1 | 0 | -3.227814 | -3.648432 | -1.735803 |
| 38 | 1 | 0 | -2.641223 | -2.260075 | -2.702382 |
| 39 | 1 | 0 | 2.427356  | 4.949114  | 1.385073  |
| 40 | 1 | 0 | 1.050118  | 4.070429  | 2.107324  |
| 41 | 1 | 0 | 2.699681  | 3.628478  | 2.565248  |
| 42 | 6 | 0 | -0.564097 | 3.667287  | -2.039368 |
| 43 | 1 | 0 | -1.299214 | 3.263142  | -2.736821 |
| 44 | 1 | 0 | -0.687986 | 4.741774  | -1.929675 |
| 45 | 1 | 0 | 0.432518  | 3.446044  | -2.427071 |
| 46 | 7 | 0 | 3.218798  | -0.961594 | -0.961382 |
| 47 | 6 | 0 | 2.767865  | -2.250139 | -0.858899 |
| 48 | 6 | 0 | 3.047856  | -3.179298 | -2.014063 |
| 49 | 1 | 0 | 2.741210  | -4.178003 | -1.712570 |
| 50 | 1 | 0 | 2.469530  | -2.878456 | -2.891029 |
| 51 | 1 | 0 | 4.104239  | -3.185139 | -2.287006 |
| 52 | 8 | 0 | -4.948825 | 0.115348  | -1.502493 |
| 53 | 8 | 0 | -3.555008 | -2.127993 | 0.313861  |
| 54 | 8 | 0 | -0.837956 | 3.570995  | 0.351079  |
| 55 | 8 | 0 | -0.638040 | -2.501420 | 0.972527  |
| 56 | 8 | 0 | 2.369581  | 3.223395  | -0.523796 |
| 57 | 8 | 0 | 2.151516  | -2.618209 | 0.127159  |
| 58 | 6 | 0 | 4.013105  | -0.451136 | -2.085213 |
| 59 | 1 | 0 | 3.729710  | -0.995469 | -2.984089 |
| 60 | 1 | 0 | 3.720481  | 0.590226  | -2.246122 |
| 61 | 6 | 0 | 5.510814  | -0.554244 | -1.831294 |
| 62 | 1 | 0 | 6.065526  | -0.153356 | -2.682109 |
| 63 | 1 | 0 | 5.798906  | 0.013783  | -0.943116 |
| 64 | 1 | 0 | 5.807703  | -1.594471 | -1.680589 |

### Structure 13 B1G-E (M06-2X, Gas Phase)

Energy (Hartrees): = -1755.1411518  
No imaginary frequencies

Standard orientation:

| Center<br>Number | Atomic<br>Number | Atomic<br>Type | Coordinates (Angstroms) |           |           |
|------------------|------------------|----------------|-------------------------|-----------|-----------|
|                  |                  |                | X                       | Y         | Z         |
| 1                | 6                | 0              | -3.189307               | 1.463807  | -0.097061 |
| 2                | 1                | 0              | -2.954999               | 2.362193  | 0.476209  |
| 3                | 1                | 0              | -3.173312               | 1.681612  | -1.165818 |
| 4                | 6                | 0              | -2.174088               | 0.372927  | 0.218118  |
| 5                | 1                | 0              | -2.419885               | -0.071351 | 1.186587  |
| 6                | 6                | 0              | -0.768743               | 0.944800  | 0.279291  |
| 7                | 1                | 0              | -0.697244               | 1.596191  | 1.151342  |
| 8                | 6                | 0              | 0.310649                | -0.138104 | 0.392399  |
| 9                | 1                | 0              | 0.199882                | -0.867943 | -0.412358 |
| 10               | 6                | 0              | 1.686451                | 0.503312  | 0.334487  |
| 11               | 1                | 0              | 1.765266                | 1.027324  | -0.617973 |
| 12               | 6                | 0              | 2.929187                | -0.419317 | 0.385393  |
| 13               | 1                | 0              | 3.743670                | 0.242280  | 0.706879  |
| 14               | 6                | 0              | 2.872471                | -1.435297 | 1.447588  |
| 15               | 7                | 0              | 2.866925                | -2.191356 | 2.310950  |
| 16               | 8                | 0              | -4.497156               | 1.068660  | 0.310010  |
| 17               | 8                | 0              | -2.196018               | -0.642866 | -0.782028 |
| 18               | 8                | 0              | -0.494593               | 1.709280  | -0.901231 |
| 19               | 8                | 0              | 0.121508                | -0.755927 | 1.663536  |
| 20               | 8                | 0              | 1.760201                | 1.448517  | 1.401831  |
| 21               | 6                | 0              | -5.242801               | 0.382132  | -0.583981 |
| 22               | 6                | 0              | -2.973364               | -1.728145 | -0.547969 |
| 23               | 6                | 0              | -0.344150               | -2.032000 | 1.709099  |
| 24               | 6                | 0              | -0.270545               | 3.039096  | -0.752294 |
| 25               | 6                | 0              | 2.320087                | 2.649205  | 1.109540  |
| 26               | 6                | 0              | -6.488235               | -0.145392 | 0.061238  |
| 27               | 6                | 0              | -2.879145               | -2.694943 | -1.684484 |
| 28               | 6                | 0              | -0.448438               | -2.504247 | 3.124638  |
| 29               | 6                | 0              | 2.201675                | 3.599366  | 2.258433  |
| 30               | 1                | 0              | -7.208604               | -0.415451 | -0.706604 |
| 31               | 1                | 0              | -6.196994               | -1.036085 | 0.623851  |
| 32               | 1                | 0              | -6.903388               | 0.582401  | 0.756430  |
| 33               | 1                | 0              | -1.008910               | -3.434577 | 3.149013  |
| 34               | 1                | 0              | 0.565121                | -2.662689 | 3.500374  |
| 35               | 1                | 0              | -0.926453               | -1.742935 | 3.740013  |
| 36               | 1                | 0              | -1.831282               | -2.921074 | -1.881289 |
| 37               | 1                | 0              | -3.427022               | -3.598931 | -1.433731 |
| 38               | 1                | 0              | -3.310307               | -2.220794 | -2.568405 |
| 39               | 1                | 0              | 2.946643                | 4.384134  | 2.154281  |
| 40               | 1                | 0              | 1.202390                | 4.038570  | 2.203088  |
| 41               | 1                | 0              | 2.303626                | 3.075634  | 3.206998  |
| 42               | 6                | 0              | 0.210483                | 3.652296  | -2.030826 |
| 43               | 1                | 0              | -0.221975               | 3.150698  | -2.894031 |

|    |   |   |           |           |           |
|----|---|---|-----------|-----------|-----------|
| 44 | 1 | 0 | -0.020034 | 4.714772  | -2.029375 |
| 45 | 1 | 0 | 1.297044  | 3.527352  | -2.052592 |
| 46 | 7 | 0 | 3.303755  | -0.905932 | -0.932508 |
| 47 | 6 | 0 | 3.152292  | -2.174123 | -1.476235 |
| 48 | 6 | 0 | 2.304940  | -3.199472 | -0.763634 |
| 49 | 1 | 0 | 2.034318  | -3.942958 | -1.509945 |
| 50 | 1 | 0 | 2.886542  | -3.687858 | 0.020033  |
| 51 | 1 | 0 | 1.401376  | -2.794566 | -0.313279 |
| 52 | 8 | 0 | -4.912325 | 0.202067  | -1.722961 |
| 53 | 8 | 0 | -3.649618 | -1.847905 | 0.436037  |
| 54 | 8 | 0 | -0.409157 | 3.615991  | 0.291477  |
| 55 | 8 | 0 | -0.606557 | -2.668550 | 0.727366  |
| 56 | 8 | 0 | 2.809742  | 2.890884  | 0.039026  |
| 57 | 8 | 0 | 3.693782  | -2.434022 | -2.528641 |
| 58 | 6 | 0 | 4.153770  | 0.031350  | -1.685194 |
| 59 | 1 | 0 | 3.942787  | -0.117862 | -2.742246 |
| 60 | 1 | 0 | 3.853685  | 1.046281  | -1.412155 |
| 61 | 6 | 0 | 5.634708  | -0.195326 | -1.405623 |
| 62 | 1 | 0 | 6.239608  | 0.531045  | -1.951219 |
| 63 | 1 | 0 | 5.859118  | -0.086965 | -0.340720 |
| 64 | 1 | 0 | 5.918713  | -1.198019 | -1.725352 |

### Structure 13 B<sub>1</sub>G<sup>-</sup>E (M06-2X, CHCl<sub>3</sub>)

Energy (Hartrees): = -1755.1721466

No imaginary frequencies

Standard orientation:

| Center<br>Number | Atomic<br>Number | Atomic<br>Type | Coordinates (Angstroms) |           |           |
|------------------|------------------|----------------|-------------------------|-----------|-----------|
|                  |                  |                | X                       | Y         | Z         |
| 1                | 6                | 0              | -3.185818               | 1.486848  | -0.037175 |
| 2                | 1                | 0              | -2.948981               | 2.366685  | 0.562859  |
| 3                | 1                | 0              | -3.172085               | 1.743173  | -1.096793 |
| 4                | 6                | 0              | -2.173264               | 0.387476  | 0.249258  |
| 5                | 1                | 0              | -2.400002               | -0.065460 | 1.217717  |
| 6                | 6                | 0              | -0.765868               | 0.959193  | 0.280328  |
| 7                | 1                | 0              | -0.688092               | 1.648961  | 1.122153  |
| 8                | 6                | 0              | 0.317700                | -0.118134 | 0.424055  |
| 9                | 1                | 0              | 0.205546                | -0.874845 | -0.355199 |
| 10               | 6                | 0              | 1.696842                | 0.513717  | 0.340374  |
| 11               | 1                | 0              | 1.761299                | 1.055027  | -0.604286 |
| 12               | 6                | 0              | 2.925327                | -0.430994 | 0.339401  |
| 13               | 1                | 0              | 3.772000                | 0.211927  | 0.609573  |
| 14               | 6                | 0              | 2.901927                | -1.430295 | 1.417793  |
| 15               | 7                | 0              | 2.921337                | -2.177108 | 2.288856  |
| 16               | 8                | 0              | -4.499673               | 1.090790  | 0.361512  |
| 17               | 8                | 0              | -2.210707               | -0.617053 | -0.766590 |
| 18               | 8                | 0              | -0.529723               | 1.666047  | -0.942263 |
| 19               | 8                | 0              | 0.152091                | -0.693204 | 1.720857  |
| 20               | 8                | 0              | 1.804553                | 1.429027  | 1.427226  |
| 21               | 6                | 0              | -5.269307               | 0.463634  | -0.549134 |
| 22               | 6                | 0              | -2.986926               | -1.701078 | -0.551176 |
| 23               | 6                | 0              | -0.365946               | -1.941597 | 1.829280  |
| 24               | 6                | 0              | -0.170574               | 2.972253  | -0.867598 |
| 25               | 6                | 0              | 2.491984                | 2.574766  | 1.190748  |
| 26               | 6                | 0              | -6.547807               | -0.010456 | 0.067962  |
| 27               | 6                | 0              | -2.856233               | -2.678486 | -1.674713 |
| 28               | 6                | 0              | -0.434715               | -2.360403 | 3.262053  |
| 29               | 6                | 0              | 2.408092                | 3.504431  | 2.356071  |
| 30               | 1                | 0              | -7.262369               | -0.257239 | -0.713715 |
| 31               | 1                | 0              | -6.318700               | -0.907046 | 0.649882  |
| 32               | 1                | 0              | -6.953266               | 0.741396  | 0.744321  |
| 33               | 1                | 0              | -0.955678               | -3.311418 | 3.337479  |
| 34               | 1                | 0              | 0.584082                | -2.456347 | 3.644912  |
| 35               | 1                | 0              | -0.945191               | -1.593871 | 3.846559  |
| 36               | 1                | 0              | -1.802649               | -2.896320 | -1.853392 |
| 37               | 1                | 0              | -3.398867               | -3.588275 | -1.430426 |
| 38               | 1                | 0              | -3.271874               | -2.226988 | -2.578483 |
| 39               | 1                | 0              | 3.135802                | 4.303541  | 2.237689  |
| 40               | 1                | 0              | 1.399083                | 3.923379  | 2.374017  |
| 41               | 1                | 0              | 2.571279                | 2.963187  | 3.287913  |
| 42               | 6                | 0              | 0.132245                | 3.521504  | -2.224835 |
| 43               | 1                | 0              | -0.589873               | 3.158004  | -2.955287 |
| 44               | 1                | 0              | 0.136855                | 4.608015  | -2.184114 |
| 45               | 1                | 0              | 1.124247                | 3.169026  | -2.521350 |
| 46               | 7                | 0              | 3.223387                | -0.945253 | -0.989648 |
| 47               | 6                | 0              | 2.992735                | -2.201787 | -1.510629 |
| 48               | 6                | 0              | 2.178565                | -3.207655 | -0.737165 |
| 49               | 1                | 0              | 1.809372                | -3.932564 | -1.460772 |
| 50               | 1                | 0              | 2.818356                | -3.729368 | -0.022354 |
| 51               | 1                | 0              | 1.333890                | -2.784419 | -0.199150 |
| 52               | 8                | 0              | -4.940548               | 0.299303  | -1.694110 |
| 53               | 8                | 0              | -3.695052               | -1.820811 | 0.412712  |
| 54               | 8                | 0              | -0.091853               | 3.572821  | 0.169946  |

|    |   |   |           |           |           |
|----|---|---|-----------|-----------|-----------|
| 55 | 8 | 0 | -0.703611 | -2.595341 | 0.879514  |
| 56 | 8 | 0 | 3.063648  | 2.779483  | 0.153410  |
| 57 | 8 | 0 | 3.452732  | -2.488844 | -2.601207 |
| 58 | 6 | 0 | 4.054399  | -0.033178 | -1.796136 |
| 59 | 1 | 0 | 3.777217  | -0.173274 | -2.839164 |
| 60 | 1 | 0 | 3.799204  | 0.988803  | -1.507360 |
| 61 | 6 | 0 | 5.540948  | -0.292972 | -1.596559 |
| 62 | 1 | 0 | 6.129351  | 0.407768  | -2.192669 |
| 63 | 1 | 0 | 5.825414  | -0.165092 | -0.548297 |
| 64 | 1 | 0 | 5.790861  | -1.308283 | -1.907991 |

### Structure 13 R-X (M06-2X, Gas Phase)

Energy (Hartrees): = - 1755.1495784

No imaginary frequencies

Standard orientation:

| Center<br>Number | Atomic<br>Number | Atomic<br>Type | Coordinates (Angstroms) |           |           |
|------------------|------------------|----------------|-------------------------|-----------|-----------|
|                  |                  |                | X                       | Y         | Z         |
| 1                | 8                | 0              | 4.083786                | 0.431345  | -2.127391 |
| 2                | 8                | 0              | 1.641957                | -0.932021 | -0.890158 |
| 3                | 8                | 0              | 2.588269                | -2.431894 | 0.493053  |
| 4                | 8                | 0              | -0.033079               | 1.431818  | -1.096139 |
| 5                | 8                | 0              | -0.414460               | 3.243722  | 0.186560  |
| 6                | 8                | 0              | -0.813171               | -1.413430 | 0.975632  |
| 7                | 8                | 0              | -0.499185               | -3.160297 | -0.410316 |
| 8                | 8                | 0              | -2.631561               | 0.964293  | 0.808512  |
| 9                | 8                | 0              | -3.310110               | 2.481018  | -0.711448 |
| 10               | 8                | 0              | -4.673949               | -0.577399 | -0.376411 |
| 11               | 8                | 0              | -5.608110               | -2.501105 | 0.285202  |
| 12               | 7                | 0              | 2.376730                | 2.827795  | 1.937587  |
| 13               | 7                | 0              | 3.890909                | 0.369053  | 0.133123  |
| 14               | 6                | 0              | 5.405801                | 0.883636  | 2.049944  |
| 15               | 1                | 0              | 6.282411                | 0.977114  | 1.406421  |
| 16               | 1                | 0              | 5.734817                | 0.509285  | 3.021426  |
| 17               | 1                | 0              | 4.978134                | 1.876487  | 2.191521  |
| 18               | 6                | 0              | 4.375611                | -0.067288 | 1.447312  |
| 19               | 1                | 0              | 4.764884                | -1.081946 | 1.363292  |
| 20               | 1                | 0              | 3.508529                | -0.139255 | 2.107188  |
| 21               | 6                | 0              | 4.512404                | 0.053400  | -1.056829 |
| 22               | 6                | 0              | 5.727867                | -0.844966 | -0.964330 |
| 23               | 1                | 0              | 5.416739                | -1.848196 | -0.658932 |
| 24               | 1                | 0              | 6.463289                | -0.486954 | -0.244493 |
| 25               | 1                | 0              | 6.171971                | -0.892315 | -1.954992 |
| 26               | 6                | 0              | 2.598366                | 1.029146  | 0.048949  |
| 27               | 1                | 0              | 2.529779                | 1.492071  | -0.937940 |
| 28               | 6                | 0              | 2.469883                | 2.060327  | 1.089010  |
| 29               | 6                | 0              | 1.457553                | -0.004379 | 0.171445  |
| 30               | 1                | 0              | 1.529472                | -0.526765 | 1.127256  |
| 31               | 6                | 0              | 2.263904                | -2.101503 | -0.616991 |
| 32               | 6                | 0              | 2.465312                | -2.886421 | -1.874347 |
| 33               | 1                | 0              | 3.055637                | -3.772948 | -1.657985 |
| 34               | 1                | 0              | 2.952493                | -2.252290 | -2.617228 |
| 35               | 1                | 0              | 1.482885                | -3.175327 | -2.252710 |
| 36               | 6                | 0              | 0.061185                | 0.592004  | 0.053422  |
| 37               | 1                | 0              | -0.160631               | 1.170742  | 0.952139  |
| 38               | 6                | 0              | -0.327435               | 2.749760  | -0.899961 |
| 39               | 6                | 0              | -0.557426               | 3.441891  | -2.206668 |
| 40               | 1                | 0              | -1.595857               | 3.247467  | -2.487160 |
| 41               | 1                | 0              | 0.100331                | 3.047903  | -2.979170 |
| 42               | 1                | 0              | -0.418474               | 4.511627  | -2.072579 |
| 43               | 6                | 0              | -0.969204               | -0.521104 | -0.134878 |
| 44               | 1                | 0              | -0.749571               | -1.061325 | -1.056262 |
| 45               | 6                | 0              | -0.529851               | -2.714106 | 0.702524  |
| 46               | 6                | 0              | -0.228607               | -3.472096 | 1.958681  |
| 47               | 1                | 0              | -0.377287               | -4.533910 | 1.779896  |
| 48               | 1                | 0              | -0.843377               | -3.118694 | 2.784296  |
| 49               | 1                | 0              | 0.823263                | -3.292888 | 2.196643  |
| 50               | 6                | 0              | -2.395227               | -0.000375 | -0.219605 |
| 51               | 1                | 0              | -2.531728               | 0.480254  | -1.189557 |
| 52               | 6                | 0              | -3.108237               | 2.177902  | 0.431023  |
| 53               | 6                | 0              | -3.284424               | 3.071043  | 1.620013  |
| 54               | 1                | 0              | -3.894778               | 3.925352  | 1.339076  |
| 55               | 1                | 0              | -2.290860               | 3.415699  | 1.915808  |
| 56               | 1                | 0              | -3.727956               | 2.523480  | 2.450200  |
| 57               | 6                | 0              | -3.395702               | -1.122985 | -0.057994 |
| 58               | 1                | 0              | -3.159129               | -1.955396 | -0.727844 |
| 59               | 1                | 0              | -3.394649               | -1.489581 | 0.969755  |
| 60               | 6                | 0              | -5.725944               | -1.388907 | -0.143794 |
| 61               | 6                | 0              | -7.016547               | -0.705659 | -0.496926 |
| 62               | 1                | 0              | -7.846611               | -1.374366 | -0.286731 |
| 63               | 1                | 0              | -7.004886               | -0.432654 | -1.552880 |
| 64               | 1                | 0              | -7.111088               | 0.215054  | 0.079802  |

-----

**Structure 37 A<sub>1</sub>G<sup>+</sup>Z (M06-2X, Gas Phase)**

Energy (Hartrees): = -1946.8556253  
No imaginary frequencies

Standard orientation:

| Center<br>Number | Atomic<br>Number | Atomic<br>Type | Coordinates (Angstroms) |           |           |
|------------------|------------------|----------------|-------------------------|-----------|-----------|
|                  |                  |                | X                       | Y         | Z         |
| 1                | 6                | 0              | -4.287250               | 0.837451  | -0.281266 |
| 2                | 1                | 0              | -4.228215               | 1.718137  | 0.365130  |
| 3                | 1                | 0              | -4.194319               | 1.159577  | -1.320216 |
| 4                | 6                | 0              | -3.202206               | -0.158491 | 0.062088  |
| 5                | 1                | 0              | -3.402350               | -0.601420 | 1.039259  |
| 6                | 6                | 0              | -1.839841               | 0.512392  | 0.108187  |
| 7                | 1                | 0              | -1.805081               | 1.146111  | 0.994526  |
| 8                | 6                | 0              | -0.681386               | -0.482783 | 0.156499  |
| 9                | 1                | 0              | -0.705440               | -1.142074 | -0.713384 |
| 10               | 6                | 0              | 0.645214                | 0.267021  | 0.179244  |
| 11               | 1                | 0              | 0.817022                | 0.693958  | -0.810844 |
| 12               | 6                | 0              | 1.851877                | -0.594806 | 0.601751  |
| 13               | 1                | 0              | 1.691282                | -0.905464 | 1.636807  |
| 14               | 6                | 0              | 1.976685                | -1.783942 | -0.253328 |
| 15               | 7                | 0              | 2.088686                | -2.686968 | -0.953264 |
| 16               | 8                | 0              | -5.530197               | 0.165074  | -0.092840 |
| 17               | 8                | 0              | -3.208458               | -1.193803 | -0.921986 |
| 18               | 8                | 0              | -1.623431               | 1.322641  | -1.053828 |
| 19               | 8                | 0              | -0.845361               | -1.254590 | 1.345297  |
| 20               | 8                | 0              | 0.560264                | 1.315254  | 1.137598  |
| 21               | 6                | 0              | -6.626915               | 0.866322  | -0.445522 |
| 22               | 6                | 0              | -3.638263               | -2.422039 | -0.534025 |
| 23               | 6                | 0              | -1.026833               | -2.601592 | 1.208006  |
| 24               | 6                | 0              | -1.547226               | 2.667991  | -0.880898 |
| 25               | 6                | 0              | 1.093933                | 2.517916  | 0.824078  |
| 26               | 6                | 0              | -7.873966               | 0.061116  | -0.214788 |
| 27               | 6                | 0              | -3.572420               | -3.389489 | -1.675199 |
| 28               | 6                | 0              | -1.363009               | -3.230174 | 2.523647  |
| 29               | 6                | 0              | 1.016773                | 3.440234  | 1.998743  |
| 30               | 1                | 0              | -8.741689               | 0.657313  | -0.483320 |
| 31               | 1                | 0              | -7.836282               | -0.848025 | -0.816319 |
| 32               | 1                | 0              | -7.924417               | -0.239287 | 0.832331  |
| 33               | 1                | 0              | -1.090464               | -4.282382 | 2.495669  |
| 34               | 1                | 0              | -0.873424               | -2.712368 | 3.346032  |
| 35               | 1                | 0              | -2.447070               | -3.147641 | 2.640543  |
| 36               | 1                | 0              | -2.522259               | -3.656803 | -1.812567 |
| 37               | 1                | 0              | -4.143755               | -4.279260 | -1.423968 |
| 38               | 1                | 0              | -3.939607               | -2.929060 | -2.591185 |
| 39               | 1                | 0              | 1.520150                | 4.373620  | 1.761835  |
| 40               | 1                | 0              | -0.036860               | 3.625775  | 2.215442  |
| 41               | 1                | 0              | 1.470715                | 2.951272  | 2.862665  |
| 42               | 6                | 0              | -1.156167               | 3.351129  | -2.155244 |
| 43               | 1                | 0              | -1.584545               | 2.843058  | -3.017028 |
| 44               | 1                | 0              | -1.467893               | 4.391734  | -2.113160 |
| 45               | 1                | 0              | -0.065884               | 3.306384  | -2.222135 |
| 46               | 7                | 0              | 3.076159                | 0.189215  | 0.569905  |
| 47               | 6                | 0              | 3.516184                | 0.732485  | 1.763372  |
| 48               | 6                | 0              | 4.672795                | 1.700377  | 1.664185  |
| 49               | 1                | 0              | 4.955505                | 1.976820  | 2.676389  |
| 50               | 1                | 0              | 5.525134                | 1.264110  | 1.141598  |
| 51               | 1                | 0              | 4.359805                | 2.593834  | 1.116029  |
| 52               | 8                | 0              | -6.574501               | 1.981600  | -0.879449 |
| 53               | 8                | 0              | -3.979632               | -2.678388 | 0.586328  |
| 54               | 8                | 0              | -1.739730               | 3.207386  | 0.172945  |
| 55               | 8                | 0              | -0.958881               | -3.165293 | 0.155328  |
| 56               | 8                | 0              | 1.551210                | 2.772248  | -0.259307 |
| 57               | 8                | 0              | 2.979290                | 0.472234  | 2.819279  |
| 58               | 6                | 0              | 5.026854                | -0.161554 | -0.955446 |
| 59               | 6                | 0              | 5.913909                | 0.406054  | -1.869159 |
| 60               | 6                | 0              | 5.385302                | -1.338632 | -0.303913 |
| 61               | 6                | 0              | 7.136770                | -0.198232 | -2.135682 |
| 62               | 1                | 0              | 5.645458                | 1.328890  | -2.374024 |
| 63               | 6                | 0              | 6.610291                | -1.941796 | -0.567086 |
| 64               | 1                | 0              | 4.707699                | -1.787674 | 0.412846  |
| 65               | 6                | 0              | 7.488206                | -1.375337 | -1.483711 |
| 66               | 1                | 0              | 7.817784                | 0.253068  | -2.847504 |
| 67               | 1                | 0              | 6.876415                | -2.858238 | -0.054341 |
| 68               | 1                | 0              | 8.442428                | -1.846401 | -1.686289 |
| 69               | 6                | 0              | 3.684925                | 0.505086  | -0.719359 |
| 70               | 1                | 0              | 2.988623                | 0.173320  | -1.495177 |
| 71               | 1                | 0              | 3.767636                | 1.588245  | -0.838097 |

-----

# Structure 37 A<sub>1</sub>G<sup>+</sup>Z (M06-2X, CHCl<sub>3</sub>)

Energy (Hartrees): = -1946.8943881  
No imaginary frequencies

Standard orientation:

| Center<br>Number | Atomic<br>Number | Atomic<br>Type | Coordinates (Angstroms) |           |           |
|------------------|------------------|----------------|-------------------------|-----------|-----------|
|                  |                  |                | X                       | Y         | Z         |
| 1                | 6                | 0              | 4.335244                | -0.755981 | -0.300746 |
| 2                | 1                | 0              | 4.330991                | -1.641697 | 0.340333  |
| 3                | 1                | 0              | 4.265535                | -1.069384 | -1.344237 |
| 4                | 6                | 0              | 3.195918                | 0.168858  | 0.060844  |
| 5                | 1                | 0              | 3.362124                | 0.587365  | 1.053849  |
| 6                | 6                | 0              | 1.861665                | -0.559347 | 0.070909  |
| 7                | 1                | 0              | 1.843020                | -1.220977 | 0.937179  |
| 8                | 6                | 0              | 0.677325                | 0.403776  | 0.138511  |
| 9                | 1                | 0              | 0.691871                | 1.084056  | -0.714933 |
| 10               | 6                | 0              | -0.636893               | -0.365263 | 0.136936  |
| 11               | 1                | 0              | -0.781037               | -0.806013 | -0.850956 |
| 12               | 6                | 0              | -1.860497               | 0.501577  | 0.511405  |
| 13               | 1                | 0              | -1.679402               | 0.946559  | 1.492953  |
| 14               | 6                | 0              | -2.050586               | 1.579958  | -0.470162 |
| 15               | 7                | 0              | -2.206079               | 2.395360  | -1.262583 |
| 16               | 8                | 0              | 5.534972                | -0.006085 | -0.100586 |
| 17               | 8                | 0              | 3.161077                | 1.236235  | -0.892912 |
| 18               | 8                | 0              | 1.687059                | -1.333614 | -1.120828 |
| 19               | 8                | 0              | 0.829271                | 1.141348  | 1.351207  |
| 20               | 8                | 0              | -0.561647               | -1.391797 | 1.117908  |
| 21               | 6                | 0              | 6.681720                | -0.640330 | -0.404572 |
| 22               | 6                | 0              | 3.474454                | 2.481161  | -0.460838 |
| 23               | 6                | 0              | 0.841995                | 2.501158  | 1.278565  |
| 24               | 6                | 0              | 1.611431                | -2.684237 | -0.999688 |
| 25               | 6                | 0              | -1.048454               | -2.615280 | 0.799015  |
| 26               | 6                | 0              | 7.869221                | 0.237811  | -0.152687 |
| 27               | 6                | 0              | 3.389434                | 3.467424  | -1.581749 |
| 28               | 6                | 0              | 1.104058                | 3.097031  | 2.623197  |
| 29               | 6                | 0              | -0.960466               | -3.535196 | 1.973247  |
| 30               | 1                | 0              | 8.776667                | -0.279728 | -0.453292 |
| 31               | 1                | 0              | 7.761337                | 1.171453  | -0.706570 |
| 32               | 1                | 0              | 7.912500                | 0.485460  | 0.909766  |
| 33               | 1                | 0              | 1.035271                | 4.179975  | 2.558610  |
| 34               | 1                | 0              | 0.389012                | 2.706833  | 3.349133  |
| 35               | 1                | 0              | 2.107272                | 2.805511  | 2.940415  |
| 36               | 1                | 0              | 2.349875                | 3.528352  | -1.910690 |
| 37               | 1                | 0              | 3.725266                | 4.441472  | -1.235009 |
| 38               | 1                | 0              | 3.994325                | 3.128466  | -2.423693 |
| 39               | 1                | 0              | -1.449880               | -4.477107 | 1.738338  |
| 40               | 1                | 0              | 0.094510                | -3.709469 | 2.196288  |
| 41               | 1                | 0              | -1.417816               | -3.062648 | 2.844283  |
| 42               | 6                | 0              | 1.281681                | -3.318880 | -2.312237 |
| 43               | 1                | 0              | 1.850815                | -2.854430 | -3.117019 |
| 44               | 1                | 0              | 1.479401                | -4.386679 | -2.259595 |
| 45               | 1                | 0              | 0.217844                | -3.156117 | -2.504600 |
| 46               | 7                | 0              | -3.055768               | -0.316800 | 0.621273  |
| 47               | 6                | 0              | -3.462847               | -0.679912 | 1.887876  |
| 48               | 6                | 0              | -4.621451               | -1.643328 | 1.966004  |
| 49               | 1                | 0              | -4.903819               | -1.740409 | 3.011554  |
| 50               | 1                | 0              | -5.478594               | -1.304352 | 1.381844  |
| 51               | 1                | 0              | -4.312489               | -2.620932 | 1.584163  |
| 52               | 8                | 0              | 6.708648                | -1.769582 | -0.815080 |
| 53               | 8                | 0              | 3.756062                | 2.733041  | 0.679831  |
| 54               | 8                | 0              | 1.767392                | -3.258547 | 0.043547  |
| 55               | 8                | 0              | 0.671305                | 3.099041  | 0.253169  |
| 56               | 8                | 0              | -1.471411               | -2.887616 | -0.293190 |
| 57               | 8                | 0              | -2.893323               | -0.270939 | 2.882299  |
| 58               | 6                | 0              | -4.984797               | 0.098433  | -0.918356 |
| 59               | 6                | 0              | -5.757536               | -0.266109 | -2.022950 |
| 60               | 6                | 0              | -5.369927               | 1.199200  | -0.157743 |
| 61               | 6                | 0              | -6.891587               | 0.460571  | -2.363317 |
| 62               | 1                | 0              | -5.465809               | -1.125498 | -2.619588 |
| 63               | 6                | 0              | -6.507174               | 1.928189  | -0.497925 |
| 64               | 1                | 0              | -4.784448               | 1.497930  | 0.705562  |
| 65               | 6                | 0              | -7.270265               | 1.562613  | -1.599881 |
| 66               | 1                | 0              | -7.481102               | 0.168006  | -3.224807 |
| 67               | 1                | 0              | -6.792299               | 2.785315  | 0.101272  |
| 68               | 1                | 0              | -8.154232               | 2.131264  | -1.864151 |
| 69               | 6                | 0              | -3.752559               | -0.728315 | -0.592121 |
| 70               | 1                | 0              | -3.044104               | -0.663745 | -1.422189 |
| 71               | 1                | 0              | -4.019561               | -1.784114 | -0.517182 |

# Structure 37 A<sub>1</sub>G<sup>+</sup>E (M06-2X, Gas Phase)

Energy (Hartrees): = -1946.8535335

No imaginary frequencies

| Standard orientation: |                  |                |                         |           |           |
|-----------------------|------------------|----------------|-------------------------|-----------|-----------|
| Center<br>Number      | Atomic<br>Number | Atomic<br>Type | Coordinates (Angstroms) |           |           |
|                       |                  |                | X                       | Y         | Z         |
| 1                     | 6                | 0              | 4.348100                | -0.846599 | -0.272672 |
| 2                     | 1                | 0              | 4.284985                | -1.739821 | 0.356335  |
| 3                     | 1                | 0              | 4.269818                | -1.150010 | -1.318078 |
| 4                     | 6                | 0              | 3.253534                | 0.133384  | 0.078233  |
| 5                     | 1                | 0              | 3.447591                | 0.580387  | 1.053914  |
| 6                     | 6                | 0              | 1.891410                | -0.548911 | 0.117526  |
| 7                     | 1                | 0              | 1.834586                | -1.154984 | 1.022835  |
| 8                     | 6                | 0              | 0.748396                | 0.461724  | 0.113456  |
| 9                     | 1                | 0              | 0.831945                | 1.134428  | -0.742414 |
| 10                    | 6                | 0              | -0.602155               | -0.231368 | 0.056107  |
| 11                    | 1                | 0              | -0.688509               | -0.758418 | -0.895249 |
| 12                    | 6                | 0              | -1.789469               | 0.762215  | 0.202533  |
| 13                    | 1                | 0              | -1.572046               | 1.451455  | 1.018030  |
| 14                    | 6                | 0              | -1.878917               | 1.569047  | -1.024062 |
| 15                    | 7                | 0              | -1.918370               | 2.152228  | -2.011551 |
| 16                    | 8                | 0              | 5.585453                | -0.172594 | -0.053594 |
| 17                    | 8                | 0              | 3.248632                | 1.171063  | -0.907699 |
| 18                    | 8                | 0              | 1.712152                | -1.392271 | -1.021970 |
| 19                    | 8                | 0              | 0.889239                | 1.200137  | 1.330658  |
| 20                    | 8                | 0              | -0.679596               | -1.164535 | 1.123346  |
| 21                    | 6                | 0              | 6.688831                | -0.867234 | -0.401976 |
| 22                    | 6                | 0              | 3.446998                | 2.443212  | -0.487359 |
| 23                    | 6                | 0              | 0.821912                | 2.558266  | 1.255998  |
| 24                    | 6                | 0              | 1.613441                | -2.733435 | -0.798316 |
| 25                    | 6                | 0              | -1.131867               | -2.418819 | 0.826748  |
| 26                    | 6                | 0              | 7.931914                | -0.063093 | -0.148063 |
| 27                    | 6                | 0              | 3.298167                | 3.411313  | -1.620519 |
| 28                    | 6                | 0              | 1.167939                | 3.184438  | 2.570253  |
| 29                    | 6                | 0              | -1.312435               | -3.225799 | 2.071098  |
| 30                    | 1                | 0              | 8.803030                | -0.655463 | -0.414025 |
| 31                    | 1                | 0              | 7.899924                | 0.852140  | -0.740578 |
| 32                    | 1                | 0              | 7.971499                | 0.225093  | 0.902969  |
| 33                    | 1                | 0              | 0.838423                | 4.220134  | 2.571023  |
| 34                    | 1                | 0              | 0.723158                | 2.626538  | 3.393491  |
| 35                    | 1                | 0              | 2.255332                | 3.146543  | 2.665557  |
| 36                    | 1                | 0              | 2.228701                | 3.609481  | -1.734740 |
| 37                    | 1                | 0              | 3.805037                | 4.339376  | -1.368729 |
| 38                    | 1                | 0              | 3.678489                | 2.988656  | -2.548400 |
| 39                    | 1                | 0              | -1.387367               | -4.276699 | 1.805590  |
| 40                    | 1                | 0              | -0.483117               | -3.054449 | 2.755421  |
| 41                    | 1                | 0              | -2.242154               | -2.898008 | 2.546353  |
| 42                    | 6                | 0              | 1.301556                | -3.465352 | -2.065789 |
| 43                    | 1                | 0              | 1.784485                | -2.992484 | -2.918728 |
| 44                    | 1                | 0              | 1.605649                | -4.503841 | -1.962746 |
| 45                    | 1                | 0              | 0.217795                | -3.421994 | -2.201288 |
| 46                    | 7                | 0              | -3.033430               | 0.077773  | 0.486612  |
| 47                    | 6                | 0              | -3.360650               | -0.250499 | 1.787873  |
| 48                    | 6                | 0              | -2.696564               | 0.527167  | 2.907470  |
| 49                    | 1                | 0              | -3.155510               | 0.198541  | 3.836261  |
| 50                    | 1                | 0              | -1.623560               | 0.328856  | 2.942361  |
| 51                    | 1                | 0              | -2.856273               | 1.601238  | 2.787110  |
| 52                    | 8                | 0              | 6.642997                | -1.976832 | -0.850160 |
| 53                    | 8                | 0              | 3.660369                | 2.736163  | 0.657055  |
| 54                    | 8                | 0              | 1.733419                | -3.223676 | 0.288603  |
| 55                    | 8                | 0              | 0.529320                | 3.135282  | 0.247543  |
| 56                    | 8                | 0              | -1.364400               | -2.772242 | -0.294370 |
| 57                    | 8                | 0              | -4.170784               | -1.123795 | 2.021491  |
| 58                    | 6                | 0              | -5.092210               | -0.124678 | -0.888397 |
| 59                    | 6                | 0              | -6.212197               | -0.668874 | -0.260106 |
| 60                    | 6                | 0              | -5.260801               | 0.921587  | -1.795764 |
| 61                    | 6                | 0              | -7.480924               | -0.169188 | -0.531360 |
| 62                    | 1                | 0              | -6.076786               | -1.472646 | 0.453399  |
| 63                    | 6                | 0              | -6.529698               | 1.421063  | -2.065473 |
| 64                    | 1                | 0              | -4.397895               | 1.344905  | -2.297999 |
| 65                    | 6                | 0              | -7.642252               | 0.877289  | -1.432725 |
| 66                    | 1                | 0              | -8.344819               | -0.599643 | -0.038821 |
| 67                    | 1                | 0              | -6.648980               | 2.230669  | -2.775635 |
| 68                    | 1                | 0              | -8.631733               | 1.265095  | -1.644574 |
| 69                    | 6                | 0              | -3.712927               | -0.670116 | -0.591446 |
| 70                    | 1                | 0              | -3.084745               | -0.610538 | -1.482234 |
| 71                    | 1                | 0              | -3.773570               | -1.718594 | -0.298676 |

# Structure 37 A<sub>1</sub>G<sup>+</sup>E (M06-2X, CHCl<sub>3</sub>)

Energy (Hartrees): = - 1946.8914331

No imaginary frequencies

Standard orientation:

| Center<br>Number | Atomic<br>Number | Atomic<br>Type | Coordinates (Angstroms) |           |           |
|------------------|------------------|----------------|-------------------------|-----------|-----------|
|                  |                  |                | X                       | Y         | Z         |
| 1                | 6                | 0              | -4.320843               | 0.873277  | -0.256503 |
| 2                | 1                | 0              | -4.257082               | 1.751989  | 0.390902  |
| 3                | 1                | 0              | -4.249140               | 1.191430  | -1.298242 |
| 4                | 6                | 0              | -3.227279               | -0.114040 | 0.079966  |
| 5                | 1                | 0              | -3.407515               | -0.544358 | 1.064988  |
| 6                | 6                | 0              | -1.857729               | 0.551391  | 0.089386  |
| 7                | 1                | 0              | -1.787090               | 1.170373  | 0.984091  |
| 8                | 6                | 0              | -0.722710               | -0.470191 | 0.083595  |
| 9                | 1                | 0              | -0.805737               | -1.126282 | -0.784454 |
| 10               | 6                | 0              | 0.633786                | 0.220572  | 0.052233  |
| 11               | 1                | 0              | 0.757520                | 0.713100  | -0.913051 |
| 12               | 6                | 0              | 1.814858                | -0.759668 | 0.289667  |
| 13               | 1                | 0              | 1.586952                | -1.377690 | 1.158800  |
| 14               | 6                | 0              | 1.925228                | -1.671779 | -0.859432 |
| 15               | 7                | 0              | 1.993490                | -2.354875 | -1.778818 |
| 16               | 8                | 0              | -5.557942               | 0.191108  | -0.042741 |
| 17               | 8                | 0              | -3.252809               | -1.162073 | -0.896622 |
| 18               | 8                | 0              | -1.679891               | 1.371098  | -1.069194 |
| 19               | 8                | 0              | -0.874494               | -1.227105 | 1.286487  |
| 20               | 8                | 0              | 0.676246                | 1.186906  | 1.093222  |
| 21               | 6                | 0              | -6.669448               | 0.890405  | -0.338172 |
| 22               | 6                | 0              | -3.542881               | -2.415636 | -0.476403 |
| 23               | 6                | 0              | -0.885937               | -2.585439 | 1.192652  |
| 24               | 6                | 0              | -1.580823               | 2.715189  | -0.886806 |
| 25               | 6                | 0              | 1.109628                | 2.441172  | 0.781473  |
| 26               | 6                | 0              | -7.903608               | 0.076174  | -0.096236 |
| 27               | 6                | 0              | -3.505722               | -3.381905 | -1.617029 |
| 28               | 6                | 0              | -1.168215               | -3.204899 | 2.522457  |
| 29               | 6                | 0              | 1.198298                | 3.289542  | 2.006404  |
| 30               | 1                | 0              | -8.783749               | 0.672892  | -0.322038 |
| 31               | 1                | 0              | -7.880638               | -0.815310 | -0.725312 |
| 32               | 1                | 0              | -7.925028               | -0.251800 | 0.944258  |
| 33               | 1                | 0              | -1.120055               | -4.287239 | 2.435316  |
| 34               | 1                | 0              | -0.447430               | -2.846323 | 3.259382  |
| 35               | 1                | 0              | -2.165781               | -2.899032 | 2.842096  |
| 36               | 1                | 0              | -2.466402               | -3.492382 | -1.935762 |
| 37               | 1                | 0              | -3.891205               | -4.344405 | -1.290257 |
| 38               | 1                | 0              | -4.082134               | -2.996533 | -2.458070 |
| 39               | 1                | 0              | 1.270620                | 4.334875  | 1.716755  |
| 40               | 1                | 0              | 0.332590                | 3.122135  | 2.646225  |
| 41               | 1                | 0              | 2.099501                | 2.998752  | 2.554891  |
| 42               | 6                | 0              | -1.309010               | 3.406950  | -2.182706 |
| 43               | 1                | 0              | -2.029035               | 3.086661  | -2.936473 |
| 44               | 1                | 0              | -1.355574               | 4.482898  | -2.035812 |
| 45               | 1                | 0              | -0.310061               | 3.122772  | -2.520925 |
| 46               | 7                | 0              | 3.060199                | -0.056954 | 0.529489  |
| 47               | 6                | 0              | 3.408108                | 0.321719  | 1.810472  |
| 48               | 6                | 0              | 2.736948                | -0.375039 | 2.973321  |
| 49               | 1                | 0              | 3.209112                | -0.010820 | 3.882612  |
| 50               | 1                | 0              | 1.668386                | -0.153408 | 3.010070  |
| 51               | 1                | 0              | 2.870119                | -1.457452 | 2.909368  |
| 52               | 8                | 0              | -6.633984               | 2.021961  | -0.741420 |
| 53               | 8                | 0              | -3.765078               | -2.691677 | 0.672282  |
| 54               | 8                | 0              | -1.687141               | 3.236787  | 0.189530  |
| 55               | 8                | 0              | -0.688118               | -3.163464 | 0.160286  |
| 56               | 8                | 0              | 1.389837                | 2.768526  | -0.338508 |
| 57               | 8                | 0              | 4.252631                | 1.179800  | 1.987636  |
| 58               | 6                | 0              | 5.110552                | 0.088459  | -0.878633 |
| 59               | 6                | 0              | 6.239206                | 0.675005  | -0.303071 |
| 60               | 6                | 0              | 5.277162                | -0.997824 | -1.739764 |
| 61               | 6                | 0              | 7.509309                | 0.175964  | -0.574236 |
| 62               | 1                | 0              | 6.111958                | 1.517836  | 0.365342  |
| 63               | 6                | 0              | 6.546730                | -1.498012 | -2.010492 |
| 64               | 1                | 0              | 4.410587                | -1.450343 | -2.209169 |
| 65               | 6                | 0              | 7.666014                | -0.913031 | -1.426181 |
| 66               | 1                | 0              | 8.377752                | 0.640705  | -0.121520 |
| 67               | 1                | 0              | 6.661171                | -2.339640 | -2.683888 |
| 68               | 1                | 0              | 8.655929                | -1.300157 | -1.638851 |
| 69               | 6                | 0              | 3.728304                | 0.636470  | -0.590471 |
| 70               | 1                | 0              | 3.095698                | 0.526702  | -1.473082 |
| 71               | 1                | 0              | 3.786332                | 1.698974  | -0.353484 |

### Structure 37 B<sub>1</sub>G<sup>+</sup>Z (M06-2X, Gas Phase)

Energy (Hartrees): = -1946.8517449  
No imaginary frequencies

Standard orientation:

| Center<br>Number | Atomic<br>Number | Atomic<br>Type | Coordinates (Angstroms) |   |   |
|------------------|------------------|----------------|-------------------------|---|---|
|                  |                  |                | X                       | Y | Z |



|    |   |   |           |           |           |
|----|---|---|-----------|-----------|-----------|
| 1  | 6 | 0 | 4.255481  | 0.556201  | -0.409607 |
| 2  | 1 | 0 | 4.118400  | 1.281437  | -1.216826 |
| 3  | 1 | 0 | 4.430269  | 1.098684  | 0.521706  |
| 4  | 6 | 0 | 3.046145  | -0.343388 | -0.275336 |
| 5  | 1 | 0 | 2.982209  | -1.005206 | -1.140938 |
| 6  | 6 | 0 | 1.767874  | 0.472810  | -0.192450 |
| 7  | 1 | 0 | 1.586509  | 0.911971  | -1.174210 |
| 8  | 6 | 0 | 0.547090  | -0.343365 | 0.231019  |
| 9  | 1 | 0 | 0.707830  | -0.783894 | 1.216987  |
| 10 | 6 | 0 | -0.683891 | 0.548891  | 0.279192  |
| 11 | 1 | 0 | -0.596991 | 1.236747  | 1.118699  |
| 12 | 6 | 0 | -2.013263 | -0.214072 | 0.386317  |
| 13 | 1 | 0 | -2.135820 | -0.786317 | -0.537627 |
| 14 | 6 | 0 | -2.026357 | -1.195180 | 1.485859  |
| 15 | 7 | 0 | -2.057500 | -2.008796 | 2.294522  |
| 16 | 8 | 0 | 5.364506  | -0.295757 | -0.687288 |
| 17 | 8 | 0 | 3.200736  | -1.138071 | 0.900466  |
| 18 | 8 | 0 | 1.891418  | 1.523204  | 0.774404  |
| 19 | 8 | 0 | 0.370742  | -1.381365 | -0.736059 |
| 20 | 8 | 0 | -0.766500 | 1.287665  | -0.947823 |
| 21 | 6 | 0 | 6.561010  | 0.318923  | -0.779435 |
| 22 | 6 | 0 | 3.466624  | -2.458410 | 0.730870  |
| 23 | 6 | 0 | 0.519464  | -2.673153 | -0.314322 |
| 24 | 6 | 0 | 1.881657  | 2.802931  | 0.325411  |
| 25 | 6 | 0 | -1.021963 | 2.617580  | -0.875270 |
| 26 | 6 | 0 | 7.652855  | -0.677105 | -1.050218 |
| 27 | 6 | 0 | 3.606158  | -3.142091 | 2.055773  |
| 28 | 6 | 0 | 0.497197  | -3.620121 | -1.473821 |
| 29 | 6 | 0 | -0.989714 | 3.241027  | -2.237886 |
| 30 | 1 | 0 | 8.594894  | -0.152496 | -1.183073 |
| 31 | 1 | 0 | 7.721982  | -1.371929 | -0.212040 |
| 32 | 1 | 0 | 7.405893  | -1.257937 | -1.939211 |
| 33 | 1 | 0 | 0.160021  | -4.594798 | -1.129615 |
| 34 | 1 | 0 | -0.127397 | -3.245595 | -2.282052 |
| 35 | 1 | 0 | 1.528775  | -3.706862 | -1.825766 |
| 36 | 1 | 0 | 2.603008  | -3.246502 | 2.474708  |
| 37 | 1 | 0 | 4.044628  | -4.125522 | 1.907637  |
| 38 | 1 | 0 | 4.207819  | -2.539317 | 2.734590  |
| 39 | 1 | 0 | -1.547251 | 4.174283  | -2.220062 |
| 40 | 1 | 0 | 0.058300  | 3.451797  | -2.464546 |
| 41 | 1 | 0 | -1.380431 | 2.558453  | -2.990777 |
| 42 | 6 | 0 | 1.794691  | 3.769964  | 1.464279  |
| 43 | 1 | 0 | 2.380409  | 3.422928  | 2.313578  |
| 44 | 1 | 0 | 2.122175  | 4.750560  | 1.129172  |
| 45 | 1 | 0 | 0.743381  | 3.820194  | 1.761276  |
| 46 | 7 | 0 | -3.121476 | 0.725661  | 0.467224  |
| 47 | 6 | 0 | -3.245363 | 1.468420  | 1.625995  |
| 48 | 6 | 0 | -4.375483 | 2.468042  | 1.686188  |
| 49 | 1 | 0 | -4.429097 | 2.830539  | 2.709128  |
| 50 | 1 | 0 | -4.153954 | 3.307907  | 1.022955  |
| 51 | 1 | 0 | -5.330876 | 2.026664  | 1.396820  |
| 52 | 8 | 0 | 6.696913  | 1.502448  | -0.654208 |
| 53 | 8 | 0 | 3.537400  | -2.984578 | -0.344426 |
| 54 | 8 | 0 | 1.903012  | 3.087854  | -0.841157 |
| 55 | 8 | 0 | 0.684192  | -2.972026 | 0.830902  |
| 56 | 8 | 0 | -1.212478 | 3.198961  | 0.156528  |
| 57 | 8 | 0 | -2.464892 | 1.314039  | 2.538720  |
| 58 | 6 | 0 | -5.038818 | -0.272036 | -0.778250 |
| 59 | 6 | 0 | -5.722555 | -0.453866 | -1.981075 |
| 60 | 6 | 0 | -5.343585 | -1.087795 | 0.307642  |
| 61 | 6 | 0 | -6.703440 | -1.428742 | -2.095032 |
| 62 | 1 | 0 | -5.481671 | 0.173407  | -2.834223 |
| 63 | 6 | 0 | -6.324688 | -2.069955 | 0.191469  |
| 64 | 1 | 0 | -4.810877 | -0.969658 | 1.245066  |
| 65 | 6 | 0 | -7.007149 | -2.241089 | -1.005430 |
| 66 | 1 | 0 | -7.226816 | -1.560524 | -3.034505 |
| 67 | 1 | 0 | -6.549203 | -2.703223 | 1.041273  |
| 68 | 1 | 0 | -7.768351 | -3.006695 | -1.094770 |
| 69 | 6 | 0 | -3.996783 | 0.827952  | -0.686621 |
| 70 | 1 | 0 | -4.487382 | 1.802161  | -0.668045 |
| 71 | 1 | 0 | -3.377132 | 0.817460  | -1.589603 |

### Structure 37 B<sub>1</sub>G<sup>+</sup>Z (M06-2X, CHCl<sub>3</sub>)

Energy (Hartrees): = - 1946.892829

No imaginary frequencies

Standard orientation:

| Center<br>Number | Atomic<br>Number | Atomic<br>Type | Coordinates (Angstroms) |           |           |
|------------------|------------------|----------------|-------------------------|-----------|-----------|
|                  |                  |                | X                       | Y         | Z         |
| 1                | 6                | 0              | 4.292691                | 0.576772  | -0.406993 |
| 2                | 1                | 0              | 4.164268                | 1.283935  | -1.230792 |
| 3                | 1                | 0              | 4.457165                | 1.131833  | 0.518954  |
| 4                | 6                | 0              | 3.083079                | -0.322652 | -0.281119 |
| 5                | 1                | 0              | 3.017903                | -0.974937 | -1.153085 |

|    |   |   |           |           |           |
|----|---|---|-----------|-----------|-----------|
| 6  | 6 | 0 | 1.802134  | 0.488652  | -0.190117 |
| 7  | 1 | 0 | 1.627031  | 0.946110  | -1.164508 |
| 8  | 6 | 0 | 0.587587  | -0.349682 | 0.210576  |
| 9  | 1 | 0 | 0.748810  | -0.803228 | 1.190220  |
| 10 | 6 | 0 | -0.657268 | 0.523139  | 0.266843  |
| 11 | 1 | 0 | -0.577423 | 1.203235  | 1.113195  |
| 12 | 6 | 0 | -1.978447 | -0.260833 | 0.366572  |
| 13 | 1 | 0 | -2.079032 | -0.858080 | -0.543841 |
| 14 | 6 | 0 | -1.984969 | -1.220692 | 1.485498  |
| 15 | 7 | 0 | -1.993890 | -2.021576 | 2.307289  |
| 16 | 8 | 0 | 5.407494  | -0.280121 | -0.659730 |
| 17 | 8 | 0 | 3.233361  | -1.125869 | 0.892371  |
| 18 | 8 | 0 | 1.916192  | 1.514534  | 0.802724  |
| 19 | 8 | 0 | 0.433650  | -1.370784 | -0.778132 |
| 20 | 8 | 0 | -0.752169 | 1.268472  | -0.951554 |
| 21 | 6 | 0 | 6.601043  | 0.328990  | -0.779814 |
| 22 | 6 | 0 | 3.509079  | -2.441586 | 0.726162  |
| 23 | 6 | 0 | 0.553353  | -2.670758 | -0.385191 |
| 24 | 6 | 0 | 1.888731  | 2.807475  | 0.393509  |
| 25 | 6 | 0 | -1.030424 | 2.594217  | -0.869827 |
| 26 | 6 | 0 | 7.692737  | -0.665147 | -1.034857 |
| 27 | 6 | 0 | 3.672898  | -3.115560 | 2.050924  |
| 28 | 6 | 0 | 0.508670  | -3.589358 | -1.563476 |
| 29 | 6 | 0 | -1.048664 | 3.219464  | -2.228420 |
| 30 | 1 | 0 | 8.640272  | -0.145730 | -1.153710 |
| 31 | 1 | 0 | 7.748379  | -1.364385 | -0.198517 |
| 32 | 1 | 0 | 7.459221  | -1.239948 | -1.932626 |
| 33 | 1 | 0 | 0.234755  | -4.588411 | -1.232172 |
| 34 | 1 | 0 | -0.182228 | -3.223458 | -2.321501 |
| 35 | 1 | 0 | 1.515209  | -3.618890 | -1.990256 |
| 36 | 1 | 0 | 2.747714  | -3.003139 | 2.618521  |
| 37 | 1 | 0 | 3.893810  | -4.168936 | 1.898349  |
| 38 | 1 | 0 | 4.477162  | -2.632620 | 2.608545  |
| 39 | 1 | 0 | -1.588751 | 4.162696  | -2.187830 |
| 40 | 1 | 0 | -0.010109 | 3.413368  | -2.509849 |
| 41 | 1 | 0 | -1.486362 | 2.546533  | -2.964743 |
| 42 | 6 | 0 | 1.850238  | 3.736579  | 1.563175  |
| 43 | 1 | 0 | 2.627379  | 3.470675  | 2.280278  |
| 44 | 1 | 0 | 1.974971  | 4.759509  | 1.217404  |
| 45 | 1 | 0 | 0.880510  | 3.627116  | 2.055105  |
| 46 | 7 | 0 | -3.104312 | 0.658395  | 0.417477  |
| 47 | 6 | 0 | -3.277124 | 1.400634  | 1.563700  |
| 48 | 6 | 0 | -4.424737 | 2.376688  | 1.586031  |
| 49 | 1 | 0 | -4.520896 | 2.749919  | 2.602827  |
| 50 | 1 | 0 | -4.208344 | 3.215781  | 0.919466  |
| 51 | 1 | 0 | -5.361621 | 1.913237  | 1.271174  |
| 52 | 8 | 0 | 6.732967  | 1.520270  | -0.690079 |
| 53 | 8 | 0 | 3.592169  | -2.967748 | -0.350717 |
| 54 | 8 | 0 | 1.879421  | 3.125470  | -0.765741 |
| 55 | 8 | 0 | 0.703401  | -2.996955 | 0.757966  |
| 56 | 8 | 0 | -1.200801 | 3.166036  | 0.172213  |
| 57 | 8 | 0 | -2.519300 | 1.261241  | 2.505626  |
| 58 | 6 | 0 | -5.095111 | -0.277715 | -0.770381 |
| 59 | 6 | 0 | -5.806671 | -0.462618 | -1.957639 |
| 60 | 6 | 0 | -5.449502 | -1.016824 | 0.355748  |
| 61 | 6 | 0 | -6.861085 | -1.364173 | -2.016809 |
| 62 | 1 | 0 | -5.529651 | 0.106364  | -2.840355 |
| 63 | 6 | 0 | -6.505766 | -1.924477 | 0.295451  |
| 64 | 1 | 0 | -4.903554 | -0.894055 | 1.285322  |
| 65 | 6 | 0 | -7.213383 | -2.100150 | -0.886999 |
| 66 | 1 | 0 | -7.404192 | -1.498679 | -2.945169 |
| 67 | 1 | 0 | -6.769844 | -2.496697 | 1.177410  |
| 68 | 1 | 0 | -8.032850 | -2.807882 | -0.932365 |
| 69 | 6 | 0 | -3.968705 | 0.739247  | -0.751007 |
| 70 | 1 | 0 | -4.377604 | 1.748951  | -0.816098 |
| 71 | 1 | 0 | -3.348068 | 0.607915  | -1.641517 |

# Structure 37 BiG+E (M06-2X, Gas Phase)

Energy (Hartrees): = -1946.85037

No imaginary frequencies

Standard orientation:

| Center<br>Number | Atomic<br>Number | Atomic<br>Type | Coordinates (Angstroms) |           |           |
|------------------|------------------|----------------|-------------------------|-----------|-----------|
|                  |                  |                | X                       | Y         | Z         |
| 1                | 6                | 0              | 4.200539                | 0.304945  | -0.378031 |
| 2                | 1                | 0              | 4.152740                | 0.982726  | -1.234984 |
| 3                | 1                | 0              | 4.425049                | 0.888456  | 0.517232  |
| 4                | 6                | 0              | 2.898395                | -0.445731 | -0.208624 |
| 5                | 1                | 0              | 2.766985                | -1.147655 | -1.033421 |
| 6                | 6                | 0              | 1.711777                | 0.505686  | -0.186513 |
| 7                | 1                | 0              | 1.571522                | 0.894400  | -1.195600 |
| 8                | 6                | 0              | 0.422930                | -0.165450 | 0.282048  |
| 9                | 1                | 0              | 0.547234                | -0.567828 | 1.289335  |

|    |   |   |           |           |           |
|----|---|---|-----------|-----------|-----------|
| 10 | 6 | 0 | -0.732503 | 0.832916  | 0.276249  |
| 11 | 1 | 0 | -0.572758 | 1.554145  | 1.076941  |
| 12 | 6 | 0 | -2.109068 | 0.155331  | 0.411000  |
| 13 | 1 | 0 | -2.162564 | -0.589420 | -0.389062 |
| 14 | 6 | 0 | -2.217803 | -0.606194 | 1.667933  |
| 15 | 7 | 0 | -2.294159 | -1.188731 | 2.654072  |
| 16 | 8 | 0 | 5.213102  | -0.678619 | -0.578527 |
| 17 | 8 | 0 | 2.955747  | -1.180317 | 1.015646  |
| 18 | 8 | 0 | 1.943978  | 1.599319  | 0.708473  |
| 19 | 8 | 0 | 0.161725  | -1.231952 | -0.631420 |
| 20 | 8 | 0 | -0.751039 | 1.510863  | -0.978633 |
| 21 | 6 | 0 | 6.472318  | -0.201227 | -0.662482 |
| 22 | 6 | 0 | 3.027903  | -2.532921 | 0.931049  |
| 23 | 6 | 0 | 0.077054  | -2.499218 | -0.125049 |
| 24 | 6 | 0 | 2.176544  | 2.820852  | 0.161175  |
| 25 | 6 | 0 | -0.766082 | 2.868420  | -0.962804 |
| 26 | 6 | 0 | 7.458140  | -1.318297 | -0.854439 |
| 27 | 6 | 0 | 3.078766  | -3.148568 | 2.295187  |
| 28 | 6 | 0 | -0.056426 | -3.505424 | -1.224968 |
| 29 | 6 | 0 | -0.732970 | 3.423973  | -2.351697 |
| 30 | 1 | 0 | 8.453370  | -0.900342 | -0.978452 |
| 31 | 1 | 0 | 7.430714  | -1.977403 | 0.014473  |
| 32 | 1 | 0 | 7.177523  | -1.909731 | -1.726317 |
| 33 | 1 | 0 | -0.559196 | -4.388805 | -0.839025 |
| 34 | 1 | 0 | -0.584213 | -3.089097 | -2.080640 |
| 35 | 1 | 0 | 0.959227  | -3.775945 | -1.525844 |
| 36 | 1 | 0 | 2.057469  | -3.156939 | 2.683286  |
| 37 | 1 | 0 | 3.441811  | -4.169843 | 2.213877  |
| 38 | 1 | 0 | 3.703625  | -2.557334 | 2.962309  |
| 39 | 1 | 0 | -1.088131 | 4.451001  | -2.333529 |
| 40 | 1 | 0 | 0.310626  | 3.408271  | -2.676686 |
| 41 | 1 | 0 | -1.324376 | 2.812602  | -3.030983 |
| 42 | 6 | 0 | 2.295383  | 3.872314  | 1.219786  |
| 43 | 1 | 0 | 2.771369  | 3.472795  | 2.113153  |
| 44 | 1 | 0 | 2.846928  | 4.720063  | 0.821356  |
| 45 | 1 | 0 | 1.280465  | 4.190677  | 1.470875  |
| 46 | 7 | 0 | -3.219507 | 1.063799  | 0.182940  |
| 47 | 6 | 0 | -3.716187 | 1.988244  | 1.092295  |
| 48 | 6 | 0 | -2.872850 | 2.340402  | 2.296564  |
| 49 | 1 | 0 | -3.521409 | 2.867700  | 2.991563  |
| 50 | 1 | 0 | -2.429795 | 1.481873  | 2.797790  |
| 51 | 1 | 0 | -2.078933 | 3.015154  | 1.969634  |
| 52 | 8 | 0 | 6.731218  | 0.965716  | -0.586967 |
| 53 | 8 | 0 | 3.006831  | -3.130833 | -0.108340 |
| 54 | 8 | 0 | 2.241749  | 3.004085  | -1.022953 |
| 55 | 8 | 0 | 0.139332  | -2.737792 | 1.044690  |
| 56 | 8 | 0 | -0.758855 | 3.511242  | 0.050584  |
| 57 | 8 | 0 | -4.776008 | 2.538836  | 0.888069  |
| 58 | 6 | 0 | -4.717103 | -0.530854 | -0.960783 |
| 59 | 6 | 0 | -4.435846 | -1.557019 | -1.858117 |
| 60 | 6 | 0 | -5.662972 | -0.742056 | 0.044939  |
| 61 | 6 | 0 | -5.092369 | -2.781849 | -1.759639 |
| 62 | 1 | 0 | -3.702953 | -1.396359 | -2.643486 |
| 63 | 6 | 0 | -6.315367 | -1.962360 | 0.145433  |
| 64 | 1 | 0 | -5.881541 | 0.062628  | 0.740035  |
| 65 | 6 | 0 | -6.030850 | -2.985270 | -0.756777 |
| 66 | 1 | 0 | -4.868324 | -3.574241 | -2.463923 |
| 67 | 1 | 0 | -7.048565 | -2.118445 | 0.927615  |
| 68 | 1 | 0 | -6.540217 | -3.937900 | -0.674817 |
| 69 | 6 | 0 | -3.993725 | 0.793726  | -1.033831 |
| 70 | 1 | 0 | -4.700328 | 1.614682  | -1.141689 |
| 71 | 1 | 0 | -3.305707 | 0.804014  | -1.884508 |

# **Structure 37 B<sub>1</sub>G<sup>+</sup>E (M06-2X, CHCl<sub>3</sub>)**

Energy (Hartrees): = -1946.8886364

No imaginary frequencies

Standard orientation:

| Center<br>Number | Atomic<br>Number | Atomic<br>Type | Coordinates (Angstroms) |           |           |
|------------------|------------------|----------------|-------------------------|-----------|-----------|
|                  |                  |                | X                       | Y         | Z         |
| 1                | 6                | 0              | 4.181040                | 0.339068  | -0.480721 |
| 2                | 1                | 0              | 4.086071                | 0.954749  | -1.379068 |
| 3                | 1                | 0              | 4.426223                | 0.979957  | 0.369067  |
| 4                | 6                | 0              | 2.902869                | -0.427943 | -0.221568 |
| 5                | 1                | 0              | 2.745899                | -1.156602 | -1.017805 |
| 6                | 6                | 0              | 1.700922                | 0.500760  | -0.173952 |
| 7                | 1                | 0              | 1.538008                | 0.884397  | -1.181274 |
| 8                | 6                | 0              | 0.430830                | -0.189349 | 0.322892  |
| 9                | 1                | 0              | 0.574466                | -0.562916 | 1.338600  |
| 10               | 6                | 0              | -0.743126               | 0.788310  | 0.311339  |
| 11               | 1                | 0              | -0.604186               | 1.501919  | 1.121902  |
| 12               | 6                | 0              | -2.112850               | 0.090516  | 0.414623  |
| 13               | 1                | 0              | -2.158180               | -0.618671 | -0.418002 |

|    |   |   |           |           |           |
|----|---|---|-----------|-----------|-----------|
| 14 | 6 | 0 | -2.228900 | -0.736500 | 1.628111  |
| 15 | 7 | 0 | -2.318641 | -1.387655 | 2.569021  |
| 16 | 8 | 0 | 5.208015  | -0.637978 | -0.658364 |
| 17 | 8 | 0 | 3.029579  | -1.117663 | 1.024559  |
| 18 | 8 | 0 | 1.929362  | 1.594760  | 0.721359  |
| 19 | 8 | 0 | 0.172275  | -1.282395 | -0.558772 |
| 20 | 8 | 0 | -0.765969 | 1.480431  | -0.935772 |
| 21 | 6 | 0 | 6.453183  | -0.156014 | -0.826860 |
| 22 | 6 | 0 | 3.188739  | -2.463271 | 0.986053  |
| 23 | 6 | 0 | 0.185199  | -2.545331 | -0.038448 |
| 24 | 6 | 0 | 2.142092  | 2.824446  | 0.185740  |
| 25 | 6 | 0 | -0.807245 | 2.838776  | -0.908048 |
| 26 | 6 | 0 | 7.444064  | -1.265995 | -1.001417 |
| 27 | 6 | 0 | 3.348818  | -3.013588 | 2.367122  |
| 28 | 6 | 0 | -0.036113 | -3.558035 | -1.114488 |
| 29 | 6 | 0 | -0.825427 | 3.400806  | -2.291773 |
| 30 | 1 | 0 | 8.440295  | -0.848511 | -1.125226 |
| 31 | 1 | 0 | 7.414352  | -1.923091 | -0.130541 |
| 32 | 1 | 0 | 7.172435  | -1.860242 | -1.875779 |
| 33 | 1 | 0 | 0.037302  | -4.555653 | -0.689280 |
| 34 | 1 | 0 | -1.023883 | -3.408488 | -1.556588 |
| 35 | 1 | 0 | 0.711974  | -3.424014 | -1.897270 |
| 36 | 1 | 0 | 2.431933  | -2.819405 | 2.927045  |
| 37 | 1 | 0 | 3.532821  | -4.083674 | 2.313824  |
| 38 | 1 | 0 | 4.171757  | -2.507048 | 2.873517  |
| 39 | 1 | 0 | -0.799265 | 4.486146  | -2.239613 |
| 40 | 1 | 0 | 0.039600  | 3.027573  | -2.842006 |
| 41 | 1 | 0 | -1.729457 | 3.070436  | -2.807378 |
| 42 | 6 | 0 | 2.285212  | 3.854246  | 1.258944  |
| 43 | 1 | 0 | 2.989887  | 3.510361  | 2.016617  |
| 44 | 1 | 0 | 2.615473  | 4.792569  | 0.820519  |
| 45 | 1 | 0 | 1.310158  | 3.990758  | 1.732681  |
| 46 | 7 | 0 | -3.229606 | 1.002366  | 0.230154  |
| 47 | 6 | 0 | -3.667464 | 1.943544  | 1.141162  |
| 48 | 6 | 0 | -2.846995 | 2.207767  | 2.380848  |
| 49 | 1 | 0 | -3.523898 | 2.607870  | 3.133265  |
| 50 | 1 | 0 | -2.330975 | 1.342146  | 2.790634  |
| 51 | 1 | 0 | -2.109590 | 2.975340  | 2.134002  |
| 52 | 8 | 0 | 6.697089  | 1.020711  | -0.834706 |
| 53 | 8 | 0 | 3.179551  | -3.099726 | -0.032216 |
| 54 | 8 | 0 | 2.185214  | 3.020578  | -0.998680 |
| 55 | 8 | 0 | 0.350606  | -2.766911 | 1.126973  |
| 56 | 8 | 0 | -0.813724 | 3.468157  | 0.114968  |
| 57 | 8 | 0 | -4.680367 | 2.582733  | 0.926519  |
| 58 | 6 | 0 | -4.781345 | -0.497938 | -0.971872 |
| 59 | 6 | 0 | -4.582265 | -1.480985 | -1.938620 |
| 60 | 6 | 0 | -5.710579 | -0.720968 | 0.047434  |
| 61 | 6 | 0 | -5.306956 | -2.670887 | -1.896507 |
| 62 | 1 | 0 | -3.858926 | -1.313343 | -2.730980 |
| 63 | 6 | 0 | -6.430847 | -1.907197 | 0.092444  |
| 64 | 1 | 0 | -5.867007 | 0.043945  | 0.802082  |
| 65 | 6 | 0 | -6.231613 | -2.884792 | -0.881461 |
| 66 | 1 | 0 | -5.146584 | -3.428757 | -2.654828 |
| 67 | 1 | 0 | -7.151590 | -2.070463 | 0.885288  |
| 68 | 1 | 0 | -6.794806 | -3.810005 | -0.845106 |
| 69 | 6 | 0 | -3.996723 | 0.793914  | -1.003671 |
| 70 | 1 | 0 | -4.663987 | 1.647484  | -1.108412 |
| 71 | 1 | 0 | -3.298759 | 0.790525  | -1.844876 |

#### Structure 37 A<sub>1</sub>G<sup>-</sup>Z (M06-2X, Gas Phase)

Energy (Hartrees): = - 1946.8560818

No imaginary frequencies

Standard orientation:

| Center<br>Number | Atomic<br>Number | Atomic<br>Type | Coordinates (Angstroms) |           |           |
|------------------|------------------|----------------|-------------------------|-----------|-----------|
|                  |                  |                | X                       | Y         | Z         |
| 1                | 6                | 0              | 4.261016                | 0.302857  | 0.138238  |
| 2                | 1                | 0              | 4.442504                | 1.246715  | -0.376711 |
| 3                | 1                | 0              | 4.350950                | 0.434013  | 1.217638  |
| 4                | 6                | 0              | 2.877858                | -0.220958 | -0.211072 |
| 5                | 1                | 0              | 2.916484                | -0.673843 | -1.203155 |
| 6                | 6                | 0              | 1.826680                | 0.876958  | -0.226605 |
| 7                | 1                | 0              | 1.991807                | 1.487556  | -1.115962 |
| 8                | 6                | 0              | 0.414276                | 0.294815  | -0.266673 |
| 9                | 1                | 0              | 0.228775                | -0.316408 | 0.617362  |
| 10               | 6                | 0              | -0.623822               | 1.401136  | -0.335398 |
| 11               | 1                | 0              | -0.554471               | 1.999882  | 0.572893  |
| 12               | 6                | 0              | -2.092723               | 0.936858  | -0.419081 |
| 13               | 1                | 0              | -2.683053               | 1.858712  | -0.481477 |
| 14               | 6                | 0              | -2.366940               | 0.161313  | -1.637017 |
| 15               | 7                | 0              | -2.587163               | -0.440394 | -2.589344 |
| 16               | 8                | 0              | 5.257840                | -0.603645 | -0.339333 |
| 17               | 8                | 0              | 2.476680                | -1.215071 | 0.735831  |
| 18               | 8                | 0              | 1.907369                | 1.707114  | 0.934027  |

|    |   |   |           |           |           |
|----|---|---|-----------|-----------|-----------|
| 19 | 8 | 0 | 0.381802  | -0.518345 | -1.440406 |
| 20 | 8 | 0 | -0.352250 | 2.223910  | -1.467809 |
| 21 | 6 | 0 | 5.615938  | -1.624222 | 0.466789  |
| 22 | 6 | 0 | 2.658178  | -2.511030 | 0.399205  |
| 23 | 6 | 0 | 0.081842  | -1.832367 | -1.314352 |
| 24 | 6 | 0 | 2.372896  | 2.973151  | 0.763532  |
| 25 | 6 | 0 | -0.114731 | 3.544078  | -1.232172 |
| 26 | 6 | 0 | 6.496055  | -2.592721 | -0.265548 |
| 27 | 6 | 0 | 2.285504  | -3.408138 | 1.535917  |
| 28 | 6 | 0 | 0.189424  | -2.525644 | -2.634548 |
| 29 | 6 | 0 | 0.356426  | 4.233430  | -2.474940 |
| 30 | 1 | 0 | 7.020408  | -3.220005 | 0.450650  |
| 31 | 1 | 0 | 5.841906  | -3.210691 | -0.885985 |
| 32 | 1 | 0 | 7.192505  | -2.067508 | -0.916751 |
| 33 | 1 | 0 | -0.031674 | -3.581054 | -2.503151 |
| 34 | 1 | 0 | -0.517218 | -2.065141 | -3.327719 |
| 35 | 1 | 0 | 1.200642  | -2.396596 | -3.022572 |
| 36 | 1 | 0 | 1.284306  | -3.152735 | 1.881914  |
| 37 | 1 | 0 | 2.326746  | -4.442889 | 1.206978  |
| 38 | 1 | 0 | 2.998870  | -3.233914 | 2.343978  |
| 39 | 1 | 0 | 0.118769  | 5.292410  | -2.410406 |
| 40 | 1 | 0 | 1.443705  | 4.118396  | -2.503286 |
| 41 | 1 | 0 | -0.073138 | 3.779981  | -3.365524 |
| 42 | 6 | 0 | 2.179723  | 3.783920  | 2.005732  |
| 43 | 1 | 0 | 2.391426  | 3.187888  | 2.892066  |
| 44 | 1 | 0 | 2.810796  | 4.667658  | 1.961802  |
| 45 | 1 | 0 | 1.129641  | 4.087188  | 2.027491  |
| 46 | 7 | 0 | -2.486827 | 0.211417  | 0.791621  |
| 47 | 6 | 0 | -2.750162 | 1.021138  | 1.883582  |
| 48 | 6 | 0 | -3.257945 | 0.343515  | 3.135849  |
| 49 | 1 | 0 | -3.423980 | 1.120684  | 3.876921  |
| 50 | 1 | 0 | -4.190097 | -0.192084 | 2.945624  |
| 51 | 1 | 0 | -2.522157 | -0.368642 | 3.515144  |
| 52 | 8 | 0 | 5.239045  | -1.741788 | 1.600274  |
| 53 | 8 | 0 | 3.078870  | -2.857982 | -0.672707 |
| 54 | 8 | 0 | 2.843012  | 3.361150  | -0.270200 |
| 55 | 8 | 0 | -0.231981 | -2.337009 | -0.269004 |
| 56 | 8 | 0 | -0.229593 | 4.047575  | -0.152100 |
| 57 | 8 | 0 | -2.560320 | 2.218266  | 1.829385  |
| 58 | 6 | 0 | -4.479348 | -1.253371 | 0.390971  |
| 59 | 6 | 0 | -5.039830 | -2.522696 | 0.240672  |
| 60 | 6 | 0 | -5.293189 | -0.134349 | 0.243029  |
| 61 | 6 | 0 | -6.389021 | -2.670226 | -0.046911 |
| 62 | 1 | 0 | -4.408534 | -3.399728 | 0.345153  |
| 63 | 6 | 0 | -6.647342 | -0.281272 | -0.048521 |
| 64 | 1 | 0 | -4.881187 | 0.863626  | 0.354158  |
| 65 | 6 | 0 | -7.198569 | -1.546830 | -0.192390 |
| 66 | 1 | 0 | -6.810534 | -3.661781 | -0.162413 |
| 67 | 1 | 0 | -7.268551 | 0.598862  | -0.163500 |
| 68 | 1 | 0 | -8.251510 | -1.660374 | -0.419623 |
| 69 | 6 | 0 | -2.999918 | -1.152800 | 0.716213  |
| 70 | 1 | 0 | -2.421037 | -1.702088 | -0.024520 |
| 71 | 1 | 0 | -2.792630 | -1.647910 | 1.666379  |

# Structure 37 A<sub>1</sub>G-Z (M06-2X, CHCl<sub>3</sub>)

Energy (Hartrees): = -1946.8927614

No imaginary frequencies

Standard orientation:

| Center<br>Number | Atomic<br>Number | Atomic<br>Type | Coordinates (Angstroms) |           |           |
|------------------|------------------|----------------|-------------------------|-----------|-----------|
|                  |                  |                | X                       | Y         | Z         |
| 1                | 6                | 0              | 4.191914                | 0.171781  | -0.084182 |
| 2                | 1                | 0              | 4.369164                | 1.033289  | -0.728657 |
| 3                | 1                | 0              | 4.347921                | 0.446438  | 0.960107  |
| 4                | 6                | 0              | 2.774330                | -0.337662 | -0.291505 |
| 5                | 1                | 0              | 2.722895                | -0.869074 | -1.244537 |
| 6                | 6                | 0              | 1.775204                | 0.808050  | -0.316118 |
| 7                | 1                | 0              | 1.959050                | 1.398934  | -1.214948 |
| 8                | 6                | 0              | 0.325525                | 0.317164  | -0.336021 |
| 9                | 1                | 0              | 0.129791                | -0.342872 | 0.511335  |
| 10               | 6                | 0              | -0.637486               | 1.492277  | -0.296829 |
| 11               | 1                | 0              | -0.477666               | 2.045446  | 0.628936  |
| 12               | 6                | 0              | -2.138201               | 1.134833  | -0.306708 |
| 13               | 1                | 0              | -2.668037               | 2.092737  | -0.333615 |
| 14               | 6                | 0              | -2.540756               | 0.395977  | -1.512528 |
| 15               | 7                | 0              | -2.866727               | -0.171150 | -2.455561 |
| 16               | 8                | 0              | 5.145922                | -0.814474 | -0.486601 |
| 17               | 8                | 0              | 2.398585                | -1.227270 | 0.764727  |
| 18               | 8                | 0              | 1.930312                | 1.635004  | 0.840098  |
| 19               | 8                | 0              | 0.172953                | -0.393127 | -1.567730 |
| 20               | 8                | 0              | -0.367942               | 2.335356  | -1.414691 |
| 21               | 6                | 0              | 5.560490                | -1.706259 | 0.433118  |
| 22               | 6                | 0              | 2.556528                | -2.551746 | 0.559489  |
| 23               | 6                | 0              | -0.026120               | -1.732374 | -1.539014 |

|    |   |   |           |           |           |
|----|---|---|-----------|-----------|-----------|
| 24 | 6 | 0 | 2.434747  | 2.883905  | 0.663316  |
| 25 | 6 | 0 | -0.107348 | 3.647609  | -1.165554 |
| 26 | 6 | 0 | 6.434875  | -2.747759 | -0.192771 |
| 27 | 6 | 0 | 2.109121  | -3.333576 | 1.752464  |
| 28 | 6 | 0 | -0.113331 | -2.281772 | -2.925688 |
| 29 | 6 | 0 | 0.278247  | 4.360137  | -2.421033 |
| 30 | 1 | 0 | 6.933027  | -3.323643 | 0.583450  |
| 31 | 1 | 0 | 5.795231  | -3.404556 | -0.787698 |
| 32 | 1 | 0 | 7.161914  | -2.286335 | -0.860719 |
| 33 | 1 | 0 | -0.332570 | -3.345476 | -2.881652 |
| 34 | 1 | 0 | -0.891726 | -1.749623 | -3.475522 |
| 35 | 1 | 0 | 0.838573  | -2.115740 | -3.435004 |
| 36 | 1 | 0 | 1.142044  | -2.970499 | 2.099578  |
| 37 | 1 | 0 | 2.054879  | -4.388787 | 1.495496  |
| 38 | 1 | 0 | 2.840826  | -3.184310 | 2.550434  |
| 39 | 1 | 0 | 0.222512  | 5.434065  | -2.260387 |
| 40 | 1 | 0 | 1.309956  | 4.083758  | -2.655347 |
| 41 | 1 | 0 | -0.357328 | 4.053019  | -3.250931 |
| 42 | 6 | 0 | 2.399171  | 3.656007  | 1.941767  |
| 43 | 1 | 0 | 2.902340  | 3.093583  | 2.729789  |
| 44 | 1 | 0 | 2.875318  | 4.622304  | 1.795680  |
| 45 | 1 | 0 | 1.356129  | 3.795263  | 2.233844  |
| 46 | 7 | 0 | -2.527550 | 0.435924  | 0.915415  |
| 47 | 6 | 0 | -2.766523 | 1.245475  | 2.005182  |
| 48 | 6 | 0 | -3.250635 | 0.579389  | 3.268544  |
| 49 | 1 | 0 | -3.461887 | 1.363167  | 3.991977  |
| 50 | 1 | 0 | -4.152752 | -0.009308 | 3.090708  |
| 51 | 1 | 0 | -2.482552 | -0.083837 | 3.672589  |
| 52 | 8 | 0 | 5.239806  | -1.663078 | 1.591747  |
| 53 | 8 | 0 | 3.023233  | -3.009937 | -0.450082 |
| 54 | 8 | 0 | 2.838997  | 3.279066  | -0.396735 |
| 55 | 8 | 0 | -0.113151 | -2.362305 | -0.517783 |
| 56 | 8 | 0 | -0.156855 | 4.124336  | -0.066279 |
| 57 | 8 | 0 | -2.576058 | 2.446473  | 1.937286  |
| 58 | 6 | 0 | -4.265713 | -1.316817 | 0.474582  |
| 59 | 6 | 0 | -4.584004 | -2.649107 | 0.206083  |
| 60 | 6 | 0 | -5.254741 | -0.344681 | 0.350457  |
| 61 | 6 | 0 | -5.870681 | -3.003867 | -0.177376 |
| 62 | 1 | 0 | -3.812916 | -3.409111 | 0.291713  |
| 63 | 6 | 0 | -6.545023 | -0.699449 | -0.037930 |
| 64 | 1 | 0 | -5.024678 | 0.698127  | 0.545680  |
| 65 | 6 | 0 | -6.856799 | -2.027415 | -0.301412 |
| 66 | 1 | 0 | -6.103821 | -4.041608 | -0.387140 |
| 67 | 1 | 0 | -7.304753 | 0.067344  | -0.138001 |
| 68 | 1 | 0 | -7.859771 | -2.302370 | -0.606173 |
| 69 | 6 | 0 | -2.843970 | -0.987559 | 0.895314  |
| 70 | 1 | 0 | -2.143907 | -1.492270 | 0.227630  |
| 71 | 1 | 0 | -2.646601 | -1.397184 | 1.886901  |

### Structure 37 A<sub>1</sub>G-E (M06-2X, Gas Phase)

Energy (Hartrees): = -1946.8533995

No imaginary frequencies

Standard orientation:

| Center<br>Number | Atomic<br>Number | Atomic<br>Type | Coordinates (Angstroms) |           |           |
|------------------|------------------|----------------|-------------------------|-----------|-----------|
|                  |                  |                | X                       | Y         | Z         |
| 1                | 6                | 0              | -4.166917               | 0.226172  | -0.111708 |
| 2                | 1                | 0              | -4.369093               | 1.126923  | 0.469848  |
| 3                | 1                | 0              | -4.256473               | 0.434456  | -1.178850 |
| 4                | 6                | 0              | -2.769252               | -0.288551 | 0.198755  |
| 5                | 1                | 0              | -2.790751               | -0.809110 | 1.158687  |
| 6                | 6                | 0              | -1.759487               | 0.843330  | 0.284428  |
| 7                | 1                | 0              | -1.955300               | 1.407318  | 1.196969  |
| 8                | 6                | 0              | -0.321316               | 0.320265  | 0.320310  |
| 9                | 1                | 0              | -0.127802               | -0.294257 | -0.560174 |
| 10               | 6                | 0              | 0.659067                | 1.482914  | 0.366062  |
| 11               | 1                | 0              | 0.518604                | 2.063478  | -0.546485 |
| 12               | 6                | 0              | 2.172216                | 1.154782  | 0.421583  |
| 13               | 1                | 0              | 2.654410                | 2.099174  | 0.683360  |
| 14               | 6                | 0              | 2.508121                | 0.239843  | 1.528513  |
| 15               | 7                | 0              | 2.762796                | -0.444226 | 2.413794  |
| 16               | 8                | 0              | -5.145853               | -0.729975 | 0.293053  |
| 17               | 8                | 0              | -2.338348               | -1.199447 | -0.812901 |
| 18               | 8                | 0              | -1.870602               | 1.720123  | -0.841608 |
| 19               | 8                | 0              | -0.235908               | -0.462181 | 1.508968  |
| 20               | 8                | 0              | 0.327006                | 2.287673  | 1.498192  |
| 21               | 6                | 0              | -5.490904               | -1.683776 | -0.599538 |
| 22               | 6                | 0              | -2.518758               | -2.521590 | -0.579205 |
| 23               | 6                | 0              | 0.046012                | -1.785996 | 1.410337  |
| 24               | 6                | 0              | -2.310002               | 2.984071  | -0.610627 |
| 25               | 6                | 0              | 0.182392                | 3.620453  | 1.290059  |
| 26               | 6                | 0              | -6.352929               | -2.725344 | 0.047361  |
| 27               | 6                | 0              | -2.069307               | -3.329047 | -1.753923 |

|    |   |   |           |           |           |
|----|---|---|-----------|-----------|-----------|
| 28 | 6 | 0 | 0.060512  | -2.426977 | 2.760444  |
| 29 | 6 | 0 | -0.325269 | 4.308775  | 2.516603  |
| 30 | 1 | 0 | -6.852835 | -3.310408 | -0.720138 |
| 31 | 1 | 0 | -5.688348 | -3.369254 | 0.629024  |
| 32 | 1 | 0 | -7.070455 | -2.268313 | 0.726728  |
| 33 | 1 | 0 | 0.089438  | -3.506461 | 2.640778  |
| 34 | 1 | 0 | 0.952117  | -2.078430 | 3.287397  |
| 35 | 1 | 0 | -0.819254 | -2.123348 | 3.327021  |
| 36 | 1 | 0 | -1.028475 | -3.089838 | -1.973807 |
| 37 | 1 | 0 | -2.178135 | -4.385892 | -1.527089 |
| 38 | 1 | 0 | -2.685543 | -3.054098 | -2.611724 |
| 39 | 1 | 0 | -0.086356 | 5.367686  | 2.460543  |
| 40 | 1 | 0 | -1.411410 | 4.185543  | 2.519622  |
| 41 | 1 | 0 | 0.084387  | 3.853276  | 3.416020  |
| 42 | 6 | 0 | -2.194689 | 3.828524  | -1.841036 |
| 43 | 1 | 0 | -2.378354 | 3.240055  | -2.737865 |
| 44 | 1 | 0 | -2.882500 | 4.666964  | -1.766818 |
| 45 | 1 | 0 | -1.170541 | 4.210393  | -1.870172 |
| 46 | 7 | 0 | 2.701513  | 0.697464  | -0.849004 |
| 47 | 6 | 0 | 3.224789  | 1.582709  | -1.776500 |
| 48 | 6 | 0 | 3.246311  | 3.057118  | -1.423950 |
| 49 | 1 | 0 | 3.552055  | 3.587178  | -2.321914 |
| 50 | 1 | 0 | 2.283603  | 3.440961  | -1.081878 |
| 51 | 1 | 0 | 3.988468  | 3.243848  | -0.642452 |
| 52 | 8 | 0 | -5.113356 | -1.694441 | -1.738275 |
| 53 | 8 | 0 | -2.990331 | -2.945078 | 0.441202  |
| 54 | 8 | 0 | -2.701595 | 3.355820  | 0.461555  |
| 55 | 8 | 0 | 0.263915  | -2.333300 | 0.363483  |
| 56 | 8 | 0 | 0.405735  | 4.141189  | 0.230358  |
| 57 | 8 | 0 | 3.667202  | 1.185085  | -2.831755 |
| 58 | 6 | 0 | 3.941957  | -1.468401 | -0.660017 |
| 59 | 6 | 0 | 3.786171  | -2.619255 | 0.108325  |
| 60 | 6 | 0 | 5.226882  | -1.018515 | -0.965601 |
| 61 | 6 | 0 | 4.898915  | -3.310352 | 0.574981  |
| 62 | 1 | 0 | 2.786140  | -2.966846 | 0.348216  |
| 63 | 6 | 0 | 6.338132  | -1.706703 | -0.494710 |
| 64 | 1 | 0 | 5.349713  | -0.140676 | -1.589969 |
| 65 | 6 | 0 | 6.176896  | -2.853085 | 0.277413  |
| 66 | 1 | 0 | 4.766568  | -4.200961 | 1.177701  |
| 67 | 1 | 0 | 7.332906  | -1.352222 | -0.737791 |
| 68 | 1 | 0 | 7.045240  | -3.387590 | 0.644026  |
| 69 | 6 | 0 | 2.719690  | -0.737922 | -1.174618 |
| 70 | 1 | 0 | 1.822733  | -1.206556 | -0.770811 |
| 71 | 1 | 0 | 2.676767  | -0.800059 | -2.262145 |

# **Structure 37 A1G-E (M06-2X, CHCl<sub>3</sub>)**

Energy (Hartrees): = - 1946.8904742  
No imaginary frequencies

| Standard orientation: |                  |                |                         |           |           |
|-----------------------|------------------|----------------|-------------------------|-----------|-----------|
| Center<br>Number      | Atomic<br>Number | Atomic<br>Type | Coordinates (Angstroms) |           |           |
|                       |                  |                | X                       | Y         | Z         |
| 1                     | 6                | 0              | -4.150182               | 0.252801  | 0.131560  |
| 2                     | 1                | 0              | -4.284751               | 1.090475  | 0.817315  |
| 3                     | 1                | 0              | -4.334648               | 0.574929  | -0.894212 |
| 4                     | 6                | 0              | -2.737864               | -0.295872 | 0.266802  |
| 5                     | 1                | 0              | -2.671473               | -0.888308 | 1.182539  |
| 6                     | 6                | 0              | -1.720219               | 0.830122  | 0.336927  |
| 7                     | 1                | 0              | -1.869069               | 1.367828  | 1.273878  |
| 8                     | 6                | 0              | -0.277889               | 0.316413  | 0.278008  |
| 9                     | 1                | 0              | -0.134249               | -0.283812 | -0.621639 |
| 10                    | 6                | 0              | 0.695379                | 1.485096  | 0.279421  |
| 11                    | 1                | 0              | 0.512073                | 2.069051  | -0.623286 |
| 12                    | 6                | 0              | 2.211510                | 1.169903  | 0.275774  |
| 13                    | 1                | 0              | 2.698145                | 2.128838  | 0.469312  |
| 14                    | 6                | 0              | 2.612436                | 0.323228  | 1.416099  |
| 15                    | 7                | 0              | 2.941452                | -0.301911 | 2.320377  |
| 16                    | 8                | 0              | -5.114029               | -0.726197 | 0.526724  |
| 17                    | 8                | 0              | -2.408679               | -1.121677 | -0.853745 |
| 18                    | 8                | 0              | -1.900307               | 1.726273  | -0.764396 |
| 19                    | 8                | 0              | -0.093317               | -0.474110 | 1.452256  |
| 20                    | 8                | 0              | 0.415822                | 2.276745  | 1.433421  |
| 21                    | 6                | 0              | -5.574260               | -1.574635 | -0.412966 |
| 22                    | 6                | 0              | -2.592275               | -2.453973 | -0.727374 |
| 23                    | 6                | 0              | 0.093626                | -1.811451 | 1.328609  |
| 24                    | 6                | 0              | -2.292827               | 2.998084  | -0.496181 |
| 25                    | 6                | 0              | 0.346186                | 3.622555  | 1.264914  |
| 26                    | 6                | 0              | -6.460278               | -2.614338 | 0.198690  |
| 27                    | 6                | 0              | -2.216057               | -3.166393 | -1.985944 |
| 28                    | 6                | 0              | 0.241121                | -2.452222 | 2.669436  |
| 29                    | 6                | 0              | -0.047689               | 4.302848  | 2.533941  |
| 30                    | 1                | 0              | -6.976300               | -3.163722 | -0.584996 |

|    |   |   |           |           |           |
|----|---|---|-----------|-----------|-----------|
| 31 | 1 | 0 | -5.828077 | -3.295388 | 0.773674  |
| 32 | 1 | 0 | -7.172749 | -2.153950 | 0.883125  |
| 33 | 1 | 0 | 0.296787  | -3.531271 | 2.550120  |
| 34 | 1 | 0 | 1.152027  | -2.073941 | 3.139561  |
| 35 | 1 | 0 | -0.605873 | -2.179937 | 3.301072  |
| 36 | 1 | 0 | -1.260845 | -2.797953 | -2.359440 |
| 37 | 1 | 0 | -2.170660 | -4.236364 | -1.798287 |
| 38 | 1 | 0 | -2.984569 | -2.954254 | -2.733853 |
| 39 | 1 | 0 | 0.102444  | 5.374950  | 2.433530  |
| 40 | 1 | 0 | -1.106150 | 4.094223  | 2.708061  |
| 41 | 1 | 0 | 0.523824  | 3.904119  | 3.372143  |
| 42 | 6 | 0 | -2.324208 | 3.820478  | -1.743616 |
| 43 | 1 | 0 | -2.825975 | 3.276815  | -2.544312 |
| 44 | 1 | 0 | -2.822586 | 4.765701  | -1.543626 |
| 45 | 1 | 0 | -1.293214 | 4.009915  | -2.053356 |
| 46 | 7 | 0 | 2.700415  | 0.647390  | -0.988200 |
| 47 | 6 | 0 | 3.236348  | 1.479131  | -1.953742 |
| 48 | 6 | 0 | 3.257062  | 2.966486  | -1.685571 |
| 49 | 1 | 0 | 3.553706  | 3.455317  | -2.610402 |
| 50 | 1 | 0 | 2.293213  | 3.359310  | -1.356864 |
| 51 | 1 | 0 | 4.000419  | 3.197390  | -0.916832 |
| 52 | 8 | 0 | -5.281092 | -1.497141 | -1.576794 |
| 53 | 8 | 0 | -3.031664 | -2.963049 | 0.269803  |
| 54 | 8 | 0 | -2.554164 | 3.381398  | 0.612084  |
| 55 | 8 | 0 | 0.135878  | -2.370788 | 0.264799  |
| 56 | 8 | 0 | 0.556748  | 4.152232  | 0.206544  |
| 57 | 8 | 0 | 3.688564  | 1.017928  | -2.983630 |
| 58 | 6 | 0 | 3.861918  | -1.538321 | -0.633266 |
| 59 | 6 | 0 | 3.647446  | -2.767598 | -0.011411 |
| 60 | 6 | 0 | 5.153684  | -1.015825 | -0.683176 |
| 61 | 6 | 0 | 4.708468  | -3.464900 | 0.556961  |
| 62 | 1 | 0 | 2.640043  | -3.169653 | 0.042067  |
| 63 | 6 | 0 | 6.213923  | -1.709659 | -0.110013 |
| 64 | 1 | 0 | 5.331132  | -0.065551 | -1.175419 |
| 65 | 6 | 0 | 5.993736  | -2.934702 | 0.513551  |
| 66 | 1 | 0 | 4.528984  | -4.415720 | 1.045829  |
| 67 | 1 | 0 | 7.214304  | -1.294030 | -0.151060 |
| 68 | 1 | 0 | 6.820027  | -3.471095 | 0.965661  |
| 69 | 6 | 0 | 2.690042  | -0.797575 | -1.243378 |
| 70 | 1 | 0 | 1.760139  | -1.225812 | -0.869615 |
| 71 | 1 | 0 | 2.695935  | -0.917447 | -2.326790 |

#### Structure 37 B<sub>1</sub>G-Z (M06-2X, Gas Phase)

Energy (Hartrees): = -1946.8534931  
No imaginary frequencies

| Standard orientation: |                  |                |                         |           |           |
|-----------------------|------------------|----------------|-------------------------|-----------|-----------|
| Center<br>Number      | Atomic<br>Number | Atomic<br>Type | Coordinates (Angstroms) |           |           |
|                       |                  |                | X                       | Y         | Z         |
| 1                     | 6                | 0              | -4.136704               | 1.138598  | -0.008869 |
| 2                     | 1                | 0              | -4.013109               | 1.974604  | 0.681250  |
| 3                     | 1                | 0              | -4.109176               | 1.494320  | -1.039960 |
| 4                     | 6                | 0              | -3.014491               | 0.127707  | 0.211374  |
| 5                     | 1                | 0              | -3.223428               | -0.456136 | 1.112001  |
| 6                     | 6                | 0              | -1.690984               | 0.858696  | 0.369529  |
| 7                     | 1                | 0              | -1.729651               | 1.479953  | 1.264624  |
| 8                     | 6                | 0              | -0.464942               | -0.060332 | 0.468189  |
| 9                     | 1                | 0              | -0.480636               | -0.800621 | -0.335164 |
| 10                    | 6                | 0              | 0.796877                | 0.785456  | 0.374270  |
| 11                    | 1                | 0              | 0.834921                | 1.230798  | -0.620013 |
| 12                    | 6                | 0              | 2.150501                | 0.080492  | 0.565025  |
| 13                    | 1                | 0              | 2.890754                | 0.888992  | 0.556298  |
| 14                    | 6                | 0              | 2.329811                | -0.564121 | 1.878322  |
| 15                    | 7                | 0              | 2.572597                | -0.999653 | 2.911981  |
| 16                    | 8                | 0              | -5.412077               | 0.577125  | 0.282366  |
| 17                    | 8                | 0              | -2.882481               | -0.756511 | -0.899119 |
| 18                    | 8                | 0              | -1.490765               | 1.700866  | -0.779875 |
| 19                    | 8                | 0              | -0.468858               | -0.710674 | 1.729018  |
| 20                    | 8                | 0              | 0.704315                | 1.823508  | 1.351090  |
| 21                    | 6                | 0              | -6.059104               | -0.033258 | -0.734881 |
| 22                    | 6                | 0              | -3.552227               | -1.930309 | -0.832540 |
| 23                    | 6                | 0              | -0.873285               | -2.012441 | 1.765238  |
| 24                    | 6                | 0              | -1.510497               | 3.041198  | -0.606579 |
| 25                    | 6                | 0              | 1.182742                | 3.039595  | 0.996574  |
| 26                    | 6                | 0              | -7.274817               | -0.750458 | -0.231413 |
| 27                    | 6                | 0              | -3.102456               | -2.854317 | -1.921234 |
| 28                    | 6                | 0              | -0.415330               | -2.670363 | 3.026571  |
| 29                    | 6                | 0              | 0.973543                | 4.040423  | 2.088740  |
| 30                    | 1                | 0              | -7.925263               | -0.993608 | -1.067639 |
| 31                    | 1                | 0              | -6.922542               | -1.668457 | 0.244318  |
| 32                    | 1                | 0              | -7.795694               | -0.151669 | 0.514145  |
| 33                    | 1                | 0              | -1.006974               | -3.564205 | 3.206107  |



|    |   |   |           |           |           |
|----|---|---|-----------|-----------|-----------|
| 34 | 1 | 0 | 0.633661  | -2.937286 | 2.874888  |
| 35 | 1 | 0 | -0.465554 | -1.979031 | 3.866186  |
| 36 | 1 | 0 | -2.106734 | -3.212833 | -1.651497 |
| 37 | 1 | 0 | -3.791192 | -3.691844 | -1.991425 |
| 38 | 1 | 0 | -3.044667 | -2.316303 | -2.866818 |
| 39 | 1 | 0 | 1.546584  | 4.937351  | 1.869547  |
| 40 | 1 | 0 | -0.092509 | 4.275275  | 2.119240  |
| 41 | 1 | 0 | 1.261787  | 3.612345  | 3.048175  |
| 42 | 6 | 0 | -1.156883 | 3.751426  | -1.879161 |
| 43 | 1 | 0 | -1.567522 | 3.227488  | -2.740385 |
| 44 | 1 | 0 | -1.518197 | 4.775487  | -1.829985 |
| 45 | 1 | 0 | -0.066445 | 3.759502  | -1.956957 |
| 46 | 7 | 0 | 2.488091  | -0.781710 | -0.560487 |
| 47 | 6 | 0 | 2.103275  | -2.103433 | -0.549943 |
| 48 | 6 | 0 | 2.638694  | -2.984209 | -1.655942 |
| 49 | 1 | 0 | 2.375690  | -4.008420 | -1.405414 |
| 50 | 1 | 0 | 2.176229  | -2.723412 | -2.610612 |
| 51 | 1 | 0 | 3.721690  | -2.890452 | -1.757670 |
| 52 | 8 | 0 | -5.677332 | -0.010061 | -1.871594 |
| 53 | 8 | 0 | -4.380947 | -2.169335 | -0.000570 |
| 54 | 8 | 0 | -1.751539 | 3.571013  | 0.443909  |
| 55 | 8 | 0 | -1.496713 | -2.522132 | 0.880540  |
| 56 | 8 | 0 | 1.685896  | 3.247912  | -0.075993 |
| 57 | 8 | 0 | 1.366318  | -2.529760 | 0.313760  |
| 58 | 6 | 0 | 4.853162  | -0.228914 | -1.148525 |
| 59 | 6 | 0 | 5.768562  | 0.489657  | -1.918837 |
| 60 | 6 | 0 | 5.309700  | -0.955835 | -0.052849 |
| 61 | 6 | 0 | 7.119991  | 0.474062  | -1.605488 |
| 62 | 1 | 0 | 5.417471  | 1.067202  | -2.768613 |
| 63 | 6 | 0 | 6.666257  | -0.966765 | 0.264747  |
| 64 | 1 | 0 | 4.613666  | -1.510574 | 0.567799  |
| 65 | 6 | 0 | 7.572991  | -0.256763 | -0.509990 |
| 66 | 1 | 0 | 7.820196  | 1.036455  | -2.211438 |
| 67 | 1 | 0 | 7.007553  | -1.531546 | 1.123892  |
| 68 | 1 | 0 | 8.627216  | -0.266156 | -0.261018 |
| 69 | 6 | 0 | 3.387948  | -0.202296 | -1.547122 |
| 70 | 1 | 0 | 3.249265  | -0.718717 | -2.497710 |
| 71 | 1 | 0 | 3.077256  | 0.834440  | -1.716084 |

-----

#### Structure 37 B<sub>1</sub>G<sup>-</sup>Z (M06-2X, CHCl<sub>3</sub>)

Energy (Hartrees): = - 1946.8932059  
No imaginary frequencies

| Standard orientation: |                  |                |                         |           |           |
|-----------------------|------------------|----------------|-------------------------|-----------|-----------|
| Center<br>Number      | Atomic<br>Number | Atomic<br>Type | Coordinates (Angstroms) |           |           |
|                       |                  |                | X                       | Y         | Z         |
| 1                     | 6                | 0              | -4.126124               | 1.107596  | 0.040471  |
| 2                     | 1                | 0              | -4.033453               | 1.908098  | 0.775082  |
| 3                     | 1                | 0              | -4.093066               | 1.521490  | -0.968308 |
| 4                     | 6                | 0              | -2.990941               | 0.109188  | 0.234992  |
| 5                     | 1                | 0              | -3.175417               | -0.484020 | 1.133882  |
| 6                     | 6                | 0              | -1.671351               | 0.853050  | 0.375205  |
| 7                     | 1                | 0              | -1.714396               | 1.480723  | 1.265669  |
| 8                     | 6                | 0              | -0.438461               | -0.056546 | 0.478584  |
| 9                     | 1                | 0              | -0.443181               | -0.803724 | -0.317368 |
| 10                    | 6                | 0              | 0.821505                | 0.793794  | 0.384795  |
| 11                    | 1                | 0              | 0.853285                | 1.244460  | -0.606863 |
| 12                    | 6                | 0              | 2.178379                | 0.087435  | 0.570604  |
| 13                    | 1                | 0              | 2.921752                | 0.892332  | 0.551995  |
| 14                    | 6                | 0              | 2.355204                | -0.529057 | 1.898647  |
| 15                    | 7                | 0              | 2.579858                | -0.925396 | 2.952180  |
| 16                    | 8                | 0              | -5.399782               | 0.508997  | 0.283157  |
| 17                    | 8                | 0              | -2.869959               | -0.761569 | -0.891250 |
| 18                    | 8                | 0              | -1.487123               | 1.680485  | -0.785129 |
| 19                    | 8                | 0              | -0.446511               | -0.695259 | 1.748900  |
| 20                    | 8                | 0              | 0.728741                | 1.818740  | 1.375556  |
| 21                    | 6                | 0              | -6.027587               | -0.067001 | -0.759290 |
| 22                    | 6                | 0              | -3.522288               | -1.941314 | -0.842805 |
| 23                    | 6                | 0              | -0.850814               | -1.990723 | 1.806533  |
| 24                    | 6                | 0              | -1.546513               | 3.024966  | -0.638492 |
| 25                    | 6                | 0              | 1.107188                | 3.071268  | 1.019085  |
| 26                    | 6                | 0              | -7.271329               | -0.768257 | -0.310063 |
| 27                    | 6                | 0              | -3.114523               | -2.817323 | -1.985010 |
| 28                    | 6                | 0              | -0.431999               | -2.619805 | 3.094922  |
| 29                    | 6                | 0              | 0.922103                | 4.027002  | 2.151822  |
| 30                    | 1                | 0              | -7.869090               | -1.045427 | -1.175035 |
| 31                    | 1                | 0              | -6.966647               | -1.666113 | 0.232565  |
| 32                    | 1                | 0              | -7.842675               | -0.135617 | 0.369123  |
| 33                    | 1                | 0              | -1.031708               | -3.507735 | 3.281258  |
| 34                    | 1                | 0              | 0.619387                | -2.898771 | 2.986443  |
| 35                    | 1                | 0              | -0.510361               | -1.911085 | 3.918490  |
| 36                    | 1                | 0              | -2.071907               | -3.108422 | -1.838931 |

|    |   |   |           |           |           |
|----|---|---|-----------|-----------|-----------|
| 37 | 1 | 0 | -3.745522 | -3.702318 | -2.011854 |
| 38 | 1 | 0 | -3.191475 | -2.263281 | -2.921417 |
| 39 | 1 | 0 | 1.281525  | 5.010507  | 1.860268  |
| 40 | 1 | 0 | -0.140839 | 4.071452  | 2.395553  |
| 41 | 1 | 0 | 1.459256  | 3.664398  | 3.029414  |
| 42 | 6 | 0 | -1.264140 | 3.715119  | -1.935178 |
| 43 | 1 | 0 | -1.860400 | 3.272849  | -2.733655 |
| 44 | 1 | 0 | -1.476639 | 4.776549  | -1.834926 |
| 45 | 1 | 0 | -0.207982 | 3.573508  | -2.176209 |
| 46 | 7 | 0 | 2.508308  | -0.796214 | -0.538373 |
| 47 | 6 | 0 | 2.112493  | -2.110361 | -0.506630 |
| 48 | 6 | 0 | 2.585584  | -3.003832 | -1.625673 |
| 49 | 1 | 0 | 2.309437  | -4.023643 | -1.368977 |
| 50 | 1 | 0 | 2.096465  | -2.727659 | -2.562969 |
| 51 | 1 | 0 | 3.665775  | -2.938110 | -1.768698 |
| 52 | 8 | 0 | -5.616060 | -0.022228 | -1.888696 |
| 53 | 8 | 0 | -4.321751 | -2.220628 | 0.009353  |
| 54 | 8 | 0 | -1.780885 | 3.562526  | 0.410966  |
| 55 | 8 | 0 | -1.456812 | -2.524394 | 0.920347  |
| 56 | 8 | 0 | 1.521613  | 3.334308  | -0.078881 |
| 57 | 8 | 0 | 1.403320  | -2.521817 | 0.394154  |
| 58 | 6 | 0 | 4.859115  | -0.236523 | -1.178842 |
| 59 | 6 | 0 | 5.737929  | 0.575231  | -1.899188 |
| 60 | 6 | 0 | 5.360216  | -1.038209 | -0.155484 |
| 61 | 6 | 0 | 7.095716  | 0.579606  | -1.606837 |
| 62 | 1 | 0 | 5.352308  | 1.208836  | -2.692082 |
| 63 | 6 | 0 | 6.721805  | -1.030203 | 0.141120  |
| 64 | 1 | 0 | 4.693529  | -1.669664 | 0.422635  |
| 65 | 6 | 0 | 7.591922  | -0.224723 | -0.583157 |
| 66 | 1 | 0 | 7.766904  | 1.215388  | -2.172580 |
| 67 | 1 | 0 | 7.097955  | -1.655114 | 0.942703  |
| 68 | 1 | 0 | 8.650111  | -0.218125 | -0.349979 |
| 69 | 6 | 0 | 3.387846  | -0.231530 | -1.555697 |
| 70 | 1 | 0 | 3.238283  | -0.774023 | -2.489266 |
| 71 | 1 | 0 | 3.067695  | 0.797147  | -1.747031 |

#### Structure 37 B<sub>1</sub>G-E (M06-2X, Gas Phase)

Energy (Hartrees): = -1946.8497931  
No imaginary frequencies

Standard orientation:

| Center<br>Number | Atomic<br>Number | Atomic<br>Type | Coordinates (Angstroms) |           |           |
|------------------|------------------|----------------|-------------------------|-----------|-----------|
|                  |                  |                | X                       | Y         | Z         |
| 1                | 6                | 0              | -3.951981               | 1.539559  | -0.150143 |
| 2                | 1                | 0              | -3.686660               | 2.446793  | 0.395133  |
| 3                | 1                | 0              | -3.931629               | 1.723440  | -1.225077 |
| 4                | 6                | 0              | -2.974485               | 0.425162  | 0.198257  |
| 5                | 1                | 0              | -3.239476               | 0.016302  | 1.176916  |
| 6                | 6                | 0              | -1.551138               | 0.949839  | 0.254773  |
| 7                | 1                | 0              | -1.461552               | 1.610081  | 1.118411  |
| 8                | 6                | 0              | -0.510527               | -0.168923 | 0.383469  |
| 9                | 1                | 0              | -0.634643               | -0.893635 | -0.423867 |
| 10               | 6                | 0              | 0.887147                | 0.425657  | 0.340174  |
| 11               | 1                | 0              | 0.989924                | 0.939960  | -0.614918 |
| 12               | 6                | 0              | 2.103662                | -0.529518 | 0.418054  |
| 13               | 1                | 0              | 2.927185                | 0.102188  | 0.778965  |
| 14               | 6                | 0              | 1.985563                | -1.562425 | 1.456755  |
| 15               | 7                | 0              | 1.924404                | -2.334133 | 2.304063  |
| 16               | 8                | 0              | -5.271195               | 1.201572  | 0.272676  |
| 17               | 8                | 0              | -3.029457               | -0.615723 | -0.774826 |
| 18               | 8                | 0              | -1.246423               | 1.690754  | -0.933547 |
| 19               | 8                | 0              | -0.744656               | -0.780875 | 1.649140  |
| 20               | 8                | 0              | 0.975437                | 1.378399  | 1.400671  |
| 21               | 6                | 0              | -6.042624               | 0.510196  | -0.595043 |
| 22               | 6                | 0              | -3.832815               | -1.673950 | -0.507025 |
| 23               | 6                | 0              | -1.219273               | -2.054781 | 1.682132  |
| 24               | 6                | 0              | -0.953603               | 3.008195  | -0.794175 |
| 25               | 6                | 0              | 1.608834                | 2.541646  | 1.118833  |
| 26               | 6                | 0              | -7.305565               | 0.052759  | 0.069670  |
| 27               | 6                | 0              | -3.783573               | -2.665425 | -1.624710 |
| 28               | 6                | 0              | -1.384615               | -2.518663 | 3.094228  |
| 29               | 6                | 0              | 1.516874                | 3.502081  | 2.261188  |
| 30               | 1                | 0              | -8.035796               | -0.220665 | -0.687577 |
| 31               | 1                | 0              | -7.047291               | -0.825515 | 0.666560  |
| 32               | 1                | 0              | -7.693861               | 0.821001  | 0.736115  |
| 33               | 1                | 0              | -1.952338               | -3.444891 | 3.099997  |
| 34               | 1                | 0              | -0.388189               | -2.682794 | 3.511006  |
| 35               | 1                | 0              | -1.883019               | -1.750787 | 3.684790  |
| 36               | 1                | 0              | -2.745310               | -2.926492 | -1.829134 |
| 37               | 1                | 0              | -4.354461               | -3.547596 | -1.348542 |
| 38               | 1                | 0              | -4.211961               | -2.195972 | -2.512419 |
| 39               | 1                | 0              | 2.284051                | 4.264636  | 2.154285  |
| 40               | 1                | 0              | 0.529959                | 3.968099  | 2.204111  |

|    |   |   |           |           |           |
|----|---|---|-----------|-----------|-----------|
| 41 | 1 | 0 | 1.603933  | 2.979815  | 3.212227  |
| 42 | 6 | 0 | -0.442021 | 3.588033  | -2.076706 |
| 43 | 1 | 0 | -0.883969 | 3.090991  | -2.937608 |
| 44 | 1 | 0 | -0.635893 | 4.657727  | -2.090096 |
| 45 | 1 | 0 | 0.640069  | 3.427706  | -2.087869 |
| 46 | 7 | 0 | 2.522061  | -1.002833 | -0.893378 |
| 47 | 6 | 0 | 2.376650  | -2.267746 | -1.448125 |
| 48 | 6 | 0 | 1.439791  | -3.258166 | -0.801680 |
| 49 | 1 | 0 | 1.156996  | -3.963104 | -1.580299 |
| 50 | 1 | 0 | 1.964224  | -3.802890 | -0.014512 |
| 51 | 1 | 0 | 0.545482  | -2.816600 | -0.368795 |
| 52 | 8 | 0 | -5.721290 | 0.276497  | -1.726942 |
| 53 | 8 | 0 | -4.494702 | -1.755311 | 0.490961  |
| 54 | 8 | 0 | -1.061346 | 3.599362  | 0.245113  |
| 55 | 8 | 0 | -1.447018 | -2.694046 | 0.693613  |
| 56 | 8 | 0 | 2.137288  | 2.750336  | 0.058199  |
| 57 | 8 | 0 | 2.987435  | -2.559847 | -2.453932 |
| 58 | 6 | 0 | 4.778623  | 0.019363  | -0.936240 |
| 59 | 6 | 0 | 5.220414  | 1.201238  | -0.345175 |
| 60 | 6 | 0 | 5.600742  | -1.110275 | -0.911580 |
| 61 | 6 | 0 | 6.472941  | 1.258082  | 0.262005  |
| 62 | 1 | 0 | 4.579699  | 2.077950  | -0.363157 |
| 63 | 6 | 0 | 6.847149  | -1.052225 | -0.303971 |
| 64 | 1 | 0 | 5.255250  | -2.024424 | -1.383250 |
| 65 | 6 | 0 | 7.285897  | 0.132446  | 0.283946  |
| 66 | 1 | 0 | 6.810629  | 2.181536  | 0.717502  |
| 67 | 1 | 0 | 7.481950  | -1.930371 | -0.292673 |
| 68 | 1 | 0 | 8.260106  | 0.175524  | 0.756200  |
| 69 | 6 | 0 | 3.414462  | -0.054069 | -1.582113 |
| 70 | 1 | 0 | 3.490281  | -0.391944 | -2.613338 |
| 71 | 1 | 0 | 2.949283  | 0.935213  | -1.563677 |

# **Structure 37 B1G-E (M06-2X, CHCl<sub>3</sub>)**

Energy (Hartrees): = -1946.8856788

No imaginary frequencies

Standard orientation:

| Center<br>Number | Atomic<br>Number | Atomic<br>Type | Coordinates (Angstroms) |           |           |
|------------------|------------------|----------------|-------------------------|-----------|-----------|
|                  |                  |                | X                       | Y         | Z         |
| 1                | 6                | 0              | -3.984230               | 1.504757  | -0.069280 |
| 2                | 1                | 0              | -3.744715               | 2.381596  | 0.533939  |
| 3                | 1                | 0              | -3.959500               | 1.762252  | -1.128452 |
| 4                | 6                | 0              | -2.985495               | 0.394996  | 0.224305  |
| 5                | 1                | 0              | -3.225869               | -0.056917 | 1.190009  |
| 6                | 6                | 0              | -1.571903               | 0.949547  | 0.271002  |
| 7                | 1                | 0              | -1.496781               | 1.638676  | 1.113441  |
| 8                | 6                | 0              | -0.506128               | -0.143225 | 0.428408  |
| 9                | 1                | 0              | -0.612604               | -0.889555 | -0.361145 |
| 10               | 6                | 0              | 0.882418                | 0.471138  | 0.377281  |
| 11               | 1                | 0              | 0.977909                | 0.993094  | -0.575479 |
| 12               | 6                | 0              | 2.107432                | -0.477183 | 0.445196  |
| 13               | 1                | 0              | 2.932272                | 0.162820  | 0.785772  |
| 14               | 6                | 0              | 2.018588                | -1.496906 | 1.499751  |
| 15               | 7                | 0              | 1.985413                | -2.265909 | 2.350847  |
| 16               | 8                | 0              | -5.304704               | 1.119782  | 0.318714  |
| 17               | 8                | 0              | -3.026281               | -0.607502 | -0.793645 |
| 18               | 8                | 0              | -1.307657               | 1.651603  | -0.948452 |
| 19               | 8                | 0              | -0.713371               | -0.729063 | 1.713715  |
| 20               | 8                | 0              | 0.963958                | 1.409167  | 1.448238  |
| 21               | 6                | 0              | -6.073551               | 0.500062  | -0.597663 |
| 22               | 6                | 0              | -3.814972               | -1.684127 | -0.585415 |
| 23               | 6                | 0              | -1.233673               | -1.979812 | 1.790788  |
| 24               | 6                | 0              | -0.953346               | 2.959162  | -0.871890 |
| 25               | 6                | 0              | 1.672725                | 2.540792  | 1.212193  |
| 26               | 6                | 0              | -7.359111               | 0.034911  | 0.011396  |
| 27               | 6                | 0              | -3.701901               | -2.651422 | -1.719337 |
| 28               | 6                | 0              | -1.369201               | -2.408040 | 3.215702  |
| 29               | 6                | 0              | 1.585512                | 3.483711  | 2.366117  |
| 30               | 1                | 0              | -8.071171               | -0.205512 | -0.774509 |
| 31               | 1                | 0              | -7.139793               | -0.864115 | 0.593377  |
| 32               | 1                | 0              | -7.762575               | 0.788839  | 0.686630  |
| 33               | 1                | 0              | -1.911490               | -3.349028 | 3.261176  |
| 34               | 1                | 0              | -0.368470               | -2.530016 | 3.637299  |
| 35               | 1                | 0              | -1.886448               | -1.636086 | 3.786785  |
| 36               | 1                | 0              | -2.651741               | -2.870423 | -1.915284 |
| 37               | 1                | 0              | -4.244264               | -3.561782 | -1.476577 |
| 38               | 1                | 0              | -4.129621               | -2.188999 | -2.612007 |
| 39               | 1                | 0              | 2.316640                | 4.278938  | 2.243120  |
| 40               | 1                | 0              | 0.577711                | 3.905709  | 2.375164  |
| 41               | 1                | 0              | 1.742868                | 2.951419  | 3.304171  |
| 42               | 6                | 0              | -0.629146               | 3.504576  | -2.225733 |
| 43               | 1                | 0              | -1.347596               | 3.147597  | -2.963146 |

|    |   |   |           |           |           |
|----|---|---|-----------|-----------|-----------|
| 44 | 1 | 0 | -0.615408 | 4.590992  | -2.185443 |
| 45 | 1 | 0 | 0.362019  | 3.142388  | -2.512599 |
| 46 | 7 | 0 | 2.512977  | -0.972229 | -0.863319 |
| 47 | 6 | 0 | 2.294709  | -2.214487 | -1.427281 |
| 48 | 6 | 0 | 1.389732  | -3.205009 | -0.740576 |
| 49 | 1 | 0 | 1.054994  | -3.903333 | -1.505516 |
| 50 | 1 | 0 | 1.958910  | -3.761603 | 0.007434  |
| 51 | 1 | 0 | 0.521676  | -2.767471 | -0.254280 |
| 52 | 8 | 0 | -5.738797 | 0.334182  | -1.740722 |
| 53 | 8 | 0 | -4.520913 | -1.804230 | 0.380119  |
| 54 | 8 | 0 | -0.896320 | 3.564215  | 0.164429  |
| 55 | 8 | 0 | -1.525238 | -2.627778 | 0.821994  |
| 56 | 8 | 0 | 2.264236  | 2.725255  | 0.181077  |
| 57 | 8 | 0 | 2.839679  | -2.508170 | -2.475940 |
| 58 | 6 | 0 | 4.795255  | -0.011408 | -0.977628 |
| 59 | 6 | 0 | 5.312290  | 1.167762  | -0.443612 |
| 60 | 6 | 0 | 5.571184  | -1.173919 | -0.948080 |
| 61 | 6 | 0 | 6.592172  | 1.190678  | 0.106992  |
| 62 | 1 | 0 | 4.705945  | 2.068354  | -0.454891 |
| 63 | 6 | 0 | 6.845564  | -1.151357 | -0.396486 |
| 64 | 1 | 0 | 5.170711  | -2.091015 | -1.368442 |
| 65 | 6 | 0 | 7.359700  | 0.032280  | 0.131174  |
| 66 | 1 | 0 | 6.985757  | 2.113064  | 0.518772  |
| 67 | 1 | 0 | 7.442309  | -2.056221 | -0.381320 |
| 68 | 1 | 0 | 8.355133  | 0.048104  | 0.559659  |
| 69 | 6 | 0 | 3.404807  | -0.037987 | -1.571474 |
| 70 | 1 | 0 | 3.432918  | -0.353775 | -2.611940 |
| 71 | 1 | 0 | 2.968229  | 0.962338  | -1.519732 |

### Structure 13 R-X (M06-2X, Gas Phase)

Energy (Hartrees): = -1946.8575287  
No imaginary frequencies

| Standard orientation: |                  |                |                         |           |           |
|-----------------------|------------------|----------------|-------------------------|-----------|-----------|
| Center<br>Number      | Atomic<br>Number | Atomic<br>Type | Coordinates (Angstroms) |           |           |
|                       |                  |                | X                       | Y         | Z         |
| 1                     | 6                | 0              | -5.897709               | -0.550001 | -1.915356 |
| 2                     | 1                | 0              | -5.775511               | 0.209141  | -2.682491 |
| 3                     | 6                | 0              | -6.910733               | -1.490477 | -2.030121 |
| 4                     | 1                | 0              | -7.577531               | -1.464894 | -2.883713 |
| 5                     | 6                | 0              | -7.068260               | -2.466467 | -1.048717 |
| 6                     | 1                | 0              | -7.857197               | -3.203472 | -1.137196 |
| 7                     | 6                | 0              | -6.209412               | -2.489882 | 0.041414  |
| 8                     | 1                | 0              | -6.324958               | -3.246240 | 0.808501  |
| 9                     | 6                | 0              | -5.193481               | -1.542973 | 0.158894  |
| 10                    | 1                | 0              | -4.530845               | -1.570160 | 1.017460  |
| 11                    | 6                | 0              | -5.031475               | -0.568466 | -0.820936 |
| 12                    | 6                | 0              | -3.938291               | 0.481911  | -0.746266 |
| 13                    | 1                | 0              | -3.287622               | 0.392408  | -1.621813 |
| 14                    | 1                | 0              | -4.381196               | 1.478694  | -0.806058 |
| 15                    | 6                | 0              | -4.591766               | 1.954651  | 1.643729  |
| 16                    | 1                | 0              | -4.756293               | 2.244899  | 2.677929  |
| 17                    | 1                | 0              | -5.468671               | 1.432370  | 1.257166  |
| 18                    | 1                | 0              | -4.419255               | 2.854100  | 1.046861  |
| 19                    | 6                | 0              | -3.352164               | 1.093873  | 1.610319  |
| 20                    | 6                | 0              | -1.880061               | -0.380832 | 0.371622  |
| 21                    | 1                | 0              | -1.894779               | -0.938065 | -0.568436 |
| 22                    | 6                | 0              | -1.789151               | -1.391154 | 1.439830  |
| 23                    | 6                | 0              | -0.657843               | 0.548684  | 0.328360  |
| 24                    | 1                | 0              | -0.702964               | 1.241871  | 1.166590  |
| 25                    | 6                | 0              | -1.198232               | 2.558415  | -0.851922 |
| 26                    | 6                | 0              | -1.204865               | 3.170435  | -2.219798 |
| 27                    | 1                | 0              | -1.807626               | 4.075027  | -2.206877 |
| 28                    | 1                | 0              | -1.571179               | 2.460336  | -2.960125 |
| 29                    | 1                | 0              | -0.170427               | 3.424699  | -2.462615 |
| 30                    | 6                | 0              | 0.674691                | -0.181096 | 0.352592  |
| 31                    | 1                | 0              | 0.854831                | -0.557703 | 1.361737  |
| 32                    | 6                | 0              | 1.111801                | -2.479122 | -0.125751 |
| 33                    | 6                | 0              | 1.269100                | -3.444547 | -1.259577 |
| 34                    | 1                | 0              | 2.273950                | -3.297464 | -1.666309 |
| 35                    | 1                | 0              | 0.540242                | -3.258971 | -2.045667 |
| 36                    | 1                | 0              | 1.192600                | -4.458854 | -0.875908 |
| 37                    | 6                | 0              | 1.802700                | 0.760314  | -0.072523 |
| 38                    | 1                | 0              | 1.600322                | 1.135930  | -1.076491 |
| 39                    | 6                | 0              | 1.648594                | 3.103351  | 0.365203  |
| 40                    | 6                | 0              | 1.432564                | 4.093838  | 1.467486  |
| 41                    | 1                | 0              | 1.692917                | 5.088399  | 1.114415  |
| 42                    | 1                | 0              | 2.005301                | 3.821450  | 2.352035  |
| 43                    | 1                | 0              | 0.368539                | 4.067435  | 1.718003  |
| 44                    | 6                | 0              | 3.159602                | 0.088761  | -0.088799 |

|    |   |   |           |           |           |
|----|---|---|-----------|-----------|-----------|
| 45 | 1 | 0 | 3.142427  | -0.693620 | -0.849654 |
| 46 | 6 | 0 | 4.004383  | -1.708972 | 1.210650  |
| 47 | 6 | 0 | 4.103276  | -2.228436 | 2.611150  |
| 48 | 1 | 0 | 4.759651  | -3.094335 | 2.629167  |
| 49 | 1 | 0 | 3.097783  | -2.519114 | 2.921466  |
| 50 | 1 | 0 | 4.462504  | -1.448302 | 3.281068  |
| 51 | 6 | 0 | 4.270183  | 1.072325  | -0.418566 |
| 52 | 1 | 0 | 4.050960  | 1.582121  | -1.359078 |
| 53 | 1 | 0 | 4.380469  | 1.795274  | 0.388752  |
| 54 | 6 | 0 | 5.703000  | -0.372017 | -1.596626 |
| 55 | 6 | 0 | 6.948107  | -1.197403 | -1.479778 |
| 56 | 1 | 0 | 7.260568  | -1.523047 | -2.468673 |
| 57 | 1 | 0 | 6.694218  | -2.068394 | -0.870946 |
| 58 | 1 | 0 | 7.737981  | -0.639876 | -0.979253 |
| 59 | 8 | 0 | -2.593787 | 1.002477  | 2.549881  |
| 60 | 8 | 0 | -1.490162 | 3.115778  | 0.169787  |
| 61 | 8 | 0 | -0.780058 | 1.269647  | -0.905596 |
| 62 | 8 | 0 | 0.649298  | -1.272524 | -0.569996 |
| 63 | 8 | 0 | 1.390769  | -2.692450 | 1.016726  |
| 64 | 8 | 0 | 1.672756  | 3.353614  | -0.809414 |
| 65 | 8 | 0 | 1.778877  | 1.849117  | 0.858257  |
| 66 | 8 | 0 | 3.410089  | -0.493918 | 1.191252  |
| 67 | 8 | 0 | 4.367383  | -2.282196 | 0.218887  |
| 68 | 8 | 0 | 5.519205  | 0.390129  | -0.493409 |
| 69 | 8 | 0 | 4.935133  | -0.380376 | -2.517852 |
| 70 | 7 | 0 | -3.100373 | 0.406951  | 0.437618  |
| 71 | 7 | 0 | -1.712852 | -2.236137 | 2.212798  |

#### Structure 42 $\text{I}^+\text{G}^-$ (M06-2X, Gas Phase)

Energy (Hartrees): = -1487.7521796

No imaginary frequencies

Standard orientation:

| Center<br>Number | Atomic<br>Number | Atomic<br>Type | Coordinates (Angstroms) |           |           |
|------------------|------------------|----------------|-------------------------|-----------|-----------|
|                  |                  |                | X                       | Y         | Z         |
| 1                | 6                | 0              | -2.078094               | -0.503828 | -2.264113 |
| 2                | 1                | 0              | -2.007488               | -0.611160 | -3.346868 |
| 3                | 6                | 0              | -0.745564               | -0.856956 | -1.635196 |
| 4                | 1                | 0              | -0.564894               | -1.928737 | -1.737530 |
| 5                | 6                | 0              | -0.686661               | -0.442052 | -0.163971 |
| 6                | 1                | 0              | -0.743963               | 0.647032  | -0.117640 |
| 7                | 6                | 0              | 0.607817                | -0.887880 | 0.491912  |
| 8                | 1                | 0              | 1.432055                | -0.444389 | -0.070247 |
| 9                | 6                | 0              | 0.802373                | -0.401091 | 1.947092  |
| 10               | 1                | 0              | 1.801172                | -0.728802 | 2.250706  |
| 11               | 6                | 0              | -0.132725               | -1.056724 | 2.874874  |
| 12               | 7                | 0              | -0.858263               | -1.574799 | 3.597473  |
| 13               | 8                | 0              | -2.396647               | 0.861557  | -1.985699 |
| 14               | 8                | 0              | 0.284414                | -0.124302 | -2.309139 |
| 15               | 8                | 0              | -1.825235               | -1.017168 | 0.475677  |
| 16               | 8                | 0              | 0.696981                | -2.302484 | 0.408845  |
| 17               | 6                | 0              | -3.533271               | 1.120132  | -1.300546 |
| 18               | 6                | 0              | -2.556554               | -0.226290 | 1.294366  |
| 19               | 6                | 0              | 1.444483                | -0.762280 | -2.586671 |
| 20               | 6                | 0              | 1.956204                | -2.804809 | 0.341646  |
| 21               | 6                | 0              | -3.653497               | 2.582266  | -0.991158 |
| 22               | 6                | 0              | -3.712905               | -0.969111 | 1.874839  |
| 23               | 6                | 0              | 1.938303                | -4.250754 | -0.039594 |
| 24               | 1                | 0              | -4.370822               | -0.265300 | 2.376935  |
| 25               | 1                | 0              | -4.241144               | -1.495856 | 1.081751  |
| 26               | 1                | 0              | -3.317596               | -1.692401 | 2.592099  |
| 27               | 1                | 0              | -3.208000               | 3.187527  | -1.777827 |
| 28               | 1                | 0              | -4.701380               | 2.831230  | -0.842224 |
| 29               | 1                | 0              | -3.112479               | 2.756655  | -0.057416 |
| 30               | 1                | 0              | 2.901434                | -4.699513 | 0.187831  |
| 31               | 1                | 0              | 1.128462                | -4.770774 | 0.470044  |
| 32               | 1                | 0              | 1.756879                | -4.291032 | -1.116111 |
| 33               | 6                | 0              | 2.458360                | 0.203198  | -3.123968 |
| 34               | 1                | 0              | 2.747771                | 0.878938  | -2.313927 |
| 35               | 1                | 0              | 3.326441                | -0.344749 | -3.479797 |
| 36               | 1                | 0              | 2.019139                | 0.805892  | -3.918333 |
| 37               | 7                | 0              | 0.704747                | 1.036094  | 2.081322  |
| 38               | 8                | 0              | -4.310542               | 0.271817  | -0.958654 |
| 39               | 8                | 0              | 1.621357                | -1.932421 | -2.386855 |
| 40               | 8                | 0              | -2.263272               | 0.921802  | 1.518224  |
| 41               | 8                | 0              | 2.928890                | -2.133338 | 0.547133  |
| 42               | 1                | 0              | -2.858842               | -1.152504 | -1.870569 |
| 43               | 1                | 0              | -0.254753               | 1.365661  | 2.070332  |
| 44               | 6                | 0              | 1.595774                | 1.849466  | 1.370730  |
| 45               | 6                | 0              | 1.218362                | 3.168209  | 1.084573  |
| 46               | 6                | 0              | 2.860349                | 1.406089  | 0.962138  |
| 47               | 6                | 0              | 2.082893                | 4.019732  | 0.415682  |
| 48               | 1                | 0              | 0.240117                | 3.516176  | 1.399589  |

|    |   |   |          |          |           |
|----|---|---|----------|----------|-----------|
| 49 | 6 | 0 | 3.718047 | 2.274185 | 0.293784  |
| 50 | 1 | 0 | 3.184444 | 0.387857 | 1.147864  |
| 51 | 6 | 0 | 3.341625 | 3.581534 | 0.012862  |
| 52 | 1 | 0 | 1.768760 | 5.035480 | 0.205888  |
| 53 | 1 | 0 | 4.693923 | 1.912762 | -0.009840 |
| 54 | 1 | 0 | 4.015888 | 4.249024 | -0.508232 |

#### Structure 42 $\text{I}_5\text{G}^+\text{G}^-$ (M06-2X, $\text{CHCl}_3$ )

Energy (Hartrees): = -1487.7794703  
No imaginary frequencies

| Standard orientation: |                  |                |                         |           |           |
|-----------------------|------------------|----------------|-------------------------|-----------|-----------|
| Center<br>Number      | Atomic<br>Number | Atomic<br>Type | Coordinates (Angstroms) |           |           |
|                       |                  |                | X                       | Y         | Z         |
| 1                     | 6                | 0              | 2.335857                | -0.883629 | 1.962560  |
| 2                     | 1                | 0              | 2.374575                | -1.282909 | 2.976298  |
| 3                     | 6                | 0              | 0.988855                | -1.200442 | 1.345623  |
| 4                     | 1                | 0              | 0.921046                | -2.274112 | 1.162583  |
| 5                     | 6                | 0              | 0.758745                | -0.419125 | 0.049690  |
| 6                     | 1                | 0              | 0.746247                | 0.646623  | 0.285342  |
| 7                     | 6                | 0              | -0.562004               | -0.781988 | -0.604346 |
| 8                     | 1                | 0              | -1.358495               | -0.560655 | 0.109587  |
| 9                     | 6                | 0              | -0.906443               | 0.023889  | -1.879524 |
| 10                    | 1                | 0              | -1.899329               | -0.309401 | -2.198884 |
| 11                    | 6                | 0              | -0.011926               | -0.312984 | -3.000528 |
| 12                    | 7                | 0              | 0.673198                | -0.572608 | -3.883761 |
| 13                    | 8                | 0              | 2.503200                | 0.536401  | 2.050745  |
| 14                    | 8                | 0              | -0.035078               | -0.798458 | 2.264419  |
| 15                    | 8                | 0              | 1.863876                | -0.721131 | -0.804653 |
| 16                    | 8                | 0              | -0.556416               | -2.173737 | -0.894843 |
| 17                    | 6                | 0              | 3.533780                | 1.102201  | 1.388363  |
| 18                    | 6                | 0              | 2.490667                | 0.302576  | -1.426977 |
| 19                    | 6                | 0              | -1.064347               | -1.646846 | 2.489272  |
| 20                    | 6                | 0              | -1.759860               | -2.797318 | -0.846971 |
| 21                    | 6                | 0              | 3.496812                | 2.593056  | 1.515392  |
| 22                    | 6                | 0              | 3.652810                | -0.179240 | -2.227804 |
| 23                    | 6                | 0              | -1.605303               | -4.277863 | -0.962154 |
| 24                    | 1                | 0              | 4.249887                | 0.672534  | -2.544091 |
| 25                    | 1                | 0              | 4.249587                | -0.872183 | -1.636224 |
| 26                    | 1                | 0              | 3.265423                | -0.706333 | -3.103673 |
| 27                    | 1                | 0              | 3.334326                | 2.881142  | 2.553983  |
| 28                    | 1                | 0              | 4.425186                | 3.013314  | 1.136186  |
| 29                    | 1                | 0              | 2.658100                | 2.965595  | 0.922099  |
| 30                    | 1                | 0              | -2.578440               | -4.735681 | -1.122037 |
| 31                    | 1                | 0              | -0.920936               | -4.524507 | -1.774068 |
| 32                    | 1                | 0              | -1.174458               | -4.641940 | -0.026398 |
| 33                    | 6                | 0              | -2.067898               | -1.031005 | 3.412553  |
| 34                    | 1                | 0              | -2.591375               | -0.236528 | 2.873667  |
| 35                    | 1                | 0              | -2.780667               | -1.786509 | 3.733423  |
| 36                    | 1                | 0              | -1.566061               | -0.579623 | 4.268365  |
| 37                    | 7                | 0              | -0.920455               | 1.453646  | -1.684476 |
| 38                    | 8                | 0              | 4.348073                | 0.471953  | 0.766642  |
| 39                    | 8                | 0              | -1.146339               | -2.733041 | 1.980920  |
| 40                    | 8                | 0              | 2.108804                | 1.443391  | -1.342402 |
| 41                    | 8                | 0              | -2.790783               | -2.193737 | -0.717851 |
| 42                    | 1                | 0              | 3.134929                | -1.316913 | 1.363799  |
| 43                    | 1                | 0              | 0.004039                | 1.864496  | -1.605397 |
| 44                    | 6                | 0              | -1.892369               | 2.043698  | -0.869792 |
| 45                    | 6                | 0              | -1.679698               | 3.357772  | -0.428171 |
| 46                    | 6                | 0              | -3.080247               | 1.394367  | -0.510093 |
| 47                    | 6                | 0              | -2.633119               | 4.005122  | 0.341805  |
| 48                    | 1                | 0              | -0.759892               | 3.863183  | -0.704517 |
| 49                    | 6                | 0              | -4.029982               | 2.060062  | 0.260613  |
| 50                    | 1                | 0              | -3.275993               | 0.371345  | -0.811470 |
| 51                    | 6                | 0              | -3.820018               | 3.363535  | 0.692039  |
| 52                    | 1                | 0              | -2.446915               | 5.021697  | 0.669487  |
| 53                    | 1                | 0              | -4.943833               | 1.539894  | 0.524813  |
| 54                    | 1                | 0              | -4.564719               | 3.872048  | 1.291660  |

#### Structure 42 $\text{I}_5\text{G}^+\text{G}^-$ (M06-2X, Gas Phase)

Energy (Hartrees): = -1487.7463848  
No imaginary frequencies

| Standard orientation: |                  |                |                         |          |           |
|-----------------------|------------------|----------------|-------------------------|----------|-----------|
| Center<br>Number      | Atomic<br>Number | Atomic<br>Type | Coordinates (Angstroms) |          |           |
|                       |                  |                | X                       | Y        | Z         |
| 1                     | 6                | 0              | -3.126738               | 1.104582 | -1.198370 |
| 2                     | 1                | 0              | -3.519177               | 2.080130 | -1.484179 |

|    |   |   |           |           |           |
|----|---|---|-----------|-----------|-----------|
| 3  | 6 | 0 | -1.681884 | 1.250062  | -0.752701 |
| 4  | 1 | 0 | -1.051361 | 1.416796  | -1.627373 |
| 5  | 6 | 0 | -1.190535 | 0.012775  | -0.000419 |
| 6  | 1 | 0 | -1.873138 | -0.229699 | 0.817207  |
| 7  | 6 | 0 | 0.194548  | 0.227404  | 0.583565  |
| 8  | 1 | 0 | 0.141188  | 1.039850  | 1.310873  |
| 9  | 6 | 0 | 0.765881  | -1.021802 | 1.303749  |
| 10 | 1 | 0 | 0.619759  | -1.907884 | 0.686008  |
| 11 | 6 | 0 | -0.006097 | -1.221252 | 2.542253  |
| 12 | 7 | 0 | -0.613167 | -1.298466 | 3.512868  |
| 13 | 8 | 0 | -3.930072 | 0.619730  | -0.120246 |
| 14 | 8 | 0 | -1.557023 | 2.363384  | 0.137511  |
| 15 | 8 | 0 | -1.189812 | -1.040092 | -0.967730 |
| 16 | 8 | 0 | 1.067014  | 0.593292  | -0.473925 |
| 17 | 6 | 0 | -4.415185 | -0.638988 | -0.221711 |
| 18 | 6 | 0 | -1.681728 | -2.246511 | -0.584652 |
| 19 | 6 | 0 | -0.670443 | 3.337027  | -0.193614 |
| 20 | 6 | 0 | 1.993450  | 1.551458  | -0.211563 |
| 21 | 6 | 0 | -5.019269 | -1.093117 | 1.071449  |
| 22 | 6 | 0 | -1.811968 | -3.171467 | -1.753984 |
| 23 | 6 | 0 | 2.845361  | 1.800599  | -1.412870 |
| 24 | 1 | 0 | -1.836849 | -4.198770 | -1.399354 |
| 25 | 1 | 0 | -2.761520 | -2.931904 | -2.238172 |
| 26 | 1 | 0 | -1.003946 | -3.014688 | -2.466599 |
| 27 | 1 | 0 | -5.447427 | -0.257800 | 1.621256  |
| 28 | 1 | 0 | -5.760784 | -1.863127 | 0.872905  |
| 29 | 1 | 0 | -4.209495 | -1.531460 | 1.663142  |
| 30 | 1 | 0 | 3.650061  | 2.480324  | -1.146483 |
| 31 | 1 | 0 | 3.244660  | 0.850616  | -1.774643 |
| 32 | 1 | 0 | 2.215906  | 2.242408  | -2.187750 |
| 33 | 6 | 0 | -0.510710 | 4.318970  | 0.926575  |
| 34 | 1 | 0 | 0.246066  | 3.911737  | 1.602781  |
| 35 | 1 | 0 | -0.150723 | 5.263988  | 0.527362  |
| 36 | 1 | 0 | -1.442786 | 4.444825  | 1.473591  |
| 37 | 7 | 0 | 2.171041  | -0.896033 | 1.629618  |
| 38 | 8 | 0 | -4.317428 | -1.306250 | -1.215901 |
| 39 | 8 | 0 | -0.075746 | 3.363486  | -1.234541 |
| 40 | 8 | 0 | -1.974500 | -2.494545 | 0.551479  |
| 41 | 8 | 0 | 2.076731  | 2.097930  | 0.855469  |
| 42 | 1 | 0 | -3.187598 | 0.414351  | -2.038537 |
| 43 | 1 | 0 | 2.353967  | -0.091835 | 2.217768  |
| 44 | 6 | 0 | 3.158969  | -1.081728 | 0.651664  |
| 45 | 6 | 0 | 4.384443  | -0.421933 | 0.811778  |
| 46 | 6 | 0 | 2.986926  | -1.911898 | -0.460654 |
| 47 | 6 | 0 | 5.408304  | -0.595676 | -0.108167 |
| 48 | 1 | 0 | 4.521664  | 0.237602  | 1.662242  |
| 49 | 6 | 0 | 4.018746  | -2.075358 | -1.376707 |
| 50 | 1 | 0 | 2.050428  | -2.425829 | -0.632676 |
| 51 | 6 | 0 | 5.234983  | -1.421782 | -1.213700 |
| 52 | 1 | 0 | 6.346400  | -0.073862 | 0.040100  |
| 53 | 1 | 0 | 3.862035  | -2.723062 | -2.231347 |
| 54 | 1 | 0 | 6.031921  | -1.554881 | -1.933970 |

#### Structure 42 $\text{I}^-\text{G}^-\text{S}^-\text{G}^-$ (M06-2X, $\text{CHCl}_3$ )

Energy (Hartrees): = -1487.7756752  
No imaginary frequencies

Standard orientation:

| Center<br>Number | Atomic<br>Number | Atomic<br>Type | Coordinates (Angstroms) |           |           |
|------------------|------------------|----------------|-------------------------|-----------|-----------|
|                  |                  |                | X                       | Y         | Z         |
| 1                | 6                | 0              | -3.121811               | 1.121298  | -1.169599 |
| 2                | 1                | 0              | -3.481892               | 2.105999  | -1.467252 |
| 3                | 6                | 0              | -1.680256               | 1.226054  | -0.710548 |
| 4                | 1                | 0              | -1.049934               | 1.417725  | -1.579665 |
| 5                | 6                | 0              | -1.199908               | -0.041362 | -0.002214 |
| 6                | 1                | 0              | -1.879819               | -0.306647 | 0.811160  |
| 7                | 6                | 0              | 0.193367                | 0.147356  | 0.577923  |
| 8                | 1                | 0              | 0.145852                | 0.917329  | 1.350197  |
| 9                | 6                | 0              | 0.803401                | -1.133228 | 1.200071  |
| 10               | 1                | 0              | 0.712664                | -1.964519 | 0.499280  |
| 11               | 6                | 0              | 0.037222                | -1.488683 | 2.407625  |
| 12               | 7                | 0              | -0.544484               | -1.709292 | 3.371585  |
| 13               | 8                | 0              | -3.955137               | 0.672275  | -0.095304 |
| 14               | 8                | 0              | -1.546391               | 2.304169  | 0.222749  |
| 15               | 8                | 0              | -1.214443               | -1.057104 | -1.007222 |
| 16               | 8                | 0              | 1.052542                | 0.572007  | -0.472638 |
| 17               | 6                | 0              | -4.465570               | -0.574652 | -0.174200 |
| 18               | 6                | 0              | -1.700304               | -2.278570 | -0.669604 |
| 19               | 6                | 0              | -0.731384               | 3.334518  | -0.109209 |
| 20               | 6                | 0              | 1.940948                | 1.562453  | -0.202146 |
| 21               | 6                | 0              | -5.165577               | -0.957237 | 1.091672  |
| 22               | 6                | 0              | -1.830729               | -3.152161 | -1.874557 |

|    |   |   |           |           |           |
|----|---|---|-----------|-----------|-----------|
| 23 | 6 | 0 | 2.791040  | 1.847758  | -1.395768 |
| 24 | 1 | 0 | -2.120081 | -4.153958 | -1.567371 |
| 25 | 1 | 0 | -2.596264 | -2.724054 | -2.524227 |
| 26 | 1 | 0 | -0.888651 | -3.174610 | -2.424327 |
| 27 | 1 | 0 | -5.657419 | -0.098185 | 1.544947  |
| 28 | 1 | 0 | -5.875429 | -1.755640 | 0.887629  |
| 29 | 1 | 0 | -4.408190 | -1.330646 | 1.787602  |
| 30 | 1 | 0 | 3.577552  | 2.547379  | -1.123787 |
| 31 | 1 | 0 | 3.216699  | 0.915126  | -1.772441 |
| 32 | 1 | 0 | 2.157844  | 2.278980  | -2.174508 |
| 33 | 6 | 0 | -0.614208 | 4.311027  | 1.017433  |
| 34 | 1 | 0 | 0.099351  | 3.902235  | 1.738065  |
| 35 | 1 | 0 | -0.234427 | 5.257442  | 0.639158  |
| 36 | 1 | 0 | -1.573116 | 4.443646  | 1.516751  |
| 37 | 7 | 0 | 2.192874  | -0.967416 | 1.575453  |
| 38 | 8 | 0 | -4.329920 | -1.285894 | -1.135361 |
| 39 | 8 | 0 | -0.166545 | 3.412939  | -1.166886 |
| 40 | 8 | 0 | -1.969556 | -2.576782 | 0.461679  |
| 41 | 8 | 0 | 1.996225  | 2.111333  | 0.865990  |
| 42 | 1 | 0 | -3.194661 | 0.432748  | -2.009892 |
| 43 | 1 | 0 | 2.324604  | -0.204114 | 2.229965  |
| 44 | 6 | 0 | 3.226266  | -1.057788 | 0.631348  |
| 45 | 6 | 0 | 4.400827  | -0.329917 | 0.867136  |
| 46 | 6 | 0 | 3.151827  | -1.861886 | -0.511894 |
| 47 | 6 | 0 | 5.471114  | -0.408747 | -0.012629 |
| 48 | 1 | 0 | 4.460194  | 0.304677  | 1.745872  |
| 49 | 6 | 0 | 4.229452  | -1.927923 | -1.388174 |
| 50 | 1 | 0 | 2.260862  | -2.436174 | -0.732565 |
| 51 | 6 | 0 | 5.395002  | -1.206052 | -1.151292 |
| 52 | 1 | 0 | 6.367898  | 0.164517  | 0.193928  |
| 53 | 1 | 0 | 4.151280  | -2.555587 | -2.268876 |
| 54 | 1 | 0 | 6.227838  | -1.263805 | -1.841195 |

#### Structure 42 sG<sup>-</sup> (M06-2X, Gas Phase)

Energy (Hartrees): = -1487.746178

No imaginary frequencies

Standard orientation:

| Center<br>Number | Atomic<br>Number | Atomic<br>Type | Coordinates (Angstroms) |           |           |
|------------------|------------------|----------------|-------------------------|-----------|-----------|
|                  |                  |                | X                       | Y         | Z         |
| 1                | 6                | 0              | 1.795103                | 2.299104  | -0.976062 |
| 2                | 1                | 0              | 2.765019                | 2.579575  | -1.389646 |
| 3                | 6                | 0              | 1.810077                | 0.827361  | -0.610889 |
| 4                | 1                | 0              | 1.855445                | 0.237210  | -1.526975 |
| 5                | 6                | 0              | 0.596221                | 0.425308  | 0.218600  |
| 6                | 1                | 0              | 0.587794                | 1.001253  | 1.145326  |
| 7                | 6                | 0              | 0.636874                | -1.052409 | 0.604326  |
| 8                | 1                | 0              | 1.380899                | -1.169048 | 1.392696  |
| 9                | 6                | 0              | -0.731103               | -1.567777 | 1.101160  |
| 10               | 1                | 0              | -1.177578               | -0.764212 | 1.694481  |
| 11               | 6                | 0              | -0.520407               | -2.724893 | 2.002750  |
| 12               | 7                | 0              | -0.344694               | -3.627939 | 2.689285  |
| 13               | 8                | 0              | 1.576276                | 3.078960  | 0.201224  |
| 14               | 8                | 0              | 2.946946                | 0.536169  | 0.208693  |
| 15               | 8                | 0              | -0.558432               | 0.765008  | -0.549500 |
| 16               | 8                | 0              | 1.031620                | -1.856491 | -0.510674 |
| 17               | 6                | 0              | 0.504901                | 3.903805  | 0.221095  |
| 18               | 6                | 0              | -1.525482               | 1.498010  | 0.072965  |
| 19               | 6                | 0              | 4.001828                | -0.082063 | -0.374347 |
| 20               | 6                | 0              | 2.180594                | -2.587575 | -0.396565 |
| 21               | 6                | 0              | 0.336374                | 4.536765  | 1.569214  |
| 22               | 6                | 0              | -2.583119               | 1.935785  | -0.886375 |
| 23               | 6                | 0              | 2.486033                | -3.299907 | -1.676946 |
| 24               | 1                | 0              | -3.442913               | 2.289301  | -0.323436 |
| 25               | 1                | 0              | -2.165754               | 2.751281  | -1.481052 |
| 26               | 1                | 0              | -2.865958               | 1.113894  | -1.542968 |
| 27               | 1                | 0              | 1.297968                | 4.681484  | 2.057110  |
| 28               | 1                | 0              | -0.198507               | 5.476993  | 1.459125  |
| 29               | 1                | 0              | -0.269635               | 3.852719  | 2.168996  |
| 30               | 1                | 0              | 3.223056                | -4.075275 | -1.485568 |
| 31               | 1                | 0              | 1.580903                | -3.719271 | -2.113286 |
| 32               | 1                | 0              | 2.905325                | -2.563404 | -2.366666 |
| 33               | 6                | 0              | 5.094575                | -0.328357 | 0.619670  |
| 34               | 1                | 0              | 4.801389                | -1.193338 | 1.218829  |
| 35               | 1                | 0              | 6.018311                | -0.547538 | 0.090531  |
| 36               | 1                | 0              | 5.210759                | 0.529718  | 1.279686  |
| 37               | 7                | 0              | -1.598165               | -1.926592 | 0.010095  |
| 38               | 8                | 0              | -0.224663               | 4.064782  | -0.718327 |
| 39               | 8                | 0              | 4.014349                | -0.401721 | -1.531631 |
| 40               | 8                | 0              | -1.477167               | 1.759553  | 1.245181  |
| 41               | 8                | 0              | 2.847525                | -2.598372 | 0.596122  |
| 42               | 1                | 0              | 1.011229                | 2.499536  | -1.705037 |
| 43               | 1                | 0              | -1.107549               | -2.202446 | -0.826691 |



|    |   |   |           |           |           |
|----|---|---|-----------|-----------|-----------|
| 44 | 6 | 0 | -2.879194 | -1.425166 | -0.168697 |
| 45 | 6 | 0 | -3.470277 | -1.534870 | -1.437193 |
| 46 | 6 | 0 | -3.615430 | -0.833704 | 0.863711  |
| 47 | 6 | 0 | -4.743753 | -1.041906 | -1.668473 |
| 48 | 1 | 0 | -2.914038 | -2.007153 | -2.240209 |
| 49 | 6 | 0 | -4.888861 | -0.333665 | 0.613787  |
| 50 | 1 | 0 | -3.213092 | -0.767589 | 1.866632  |
| 51 | 6 | 0 | -5.462635 | -0.424048 | -0.647609 |
| 52 | 1 | 0 | -5.176221 | -1.137450 | -2.657752 |
| 53 | 1 | 0 | -5.436765 | 0.127752  | 1.427115  |
| 54 | 1 | 0 | -6.455620 | -0.034161 | -0.830303 |

#### Structure 42 $\text{sG}^-$ (M06-2X, $\text{CHCl}_3$ )

Energy (Hartrees): = -1487.7750899  
No imaginary frequencies

Standard orientation:

| Center<br>Number | Atomic<br>Number | Atomic<br>Type | Coordinates (Angstroms) |           |           |
|------------------|------------------|----------------|-------------------------|-----------|-----------|
|                  |                  |                | X                       | Y         | Z         |
| 1                | 6                | 0              | 1.859171                | 2.291857  | -0.980605 |
| 2                | 1                | 0              | 2.834605                | 2.550213  | -1.395746 |
| 3                | 6                | 0              | 1.832838                | 0.819379  | -0.624729 |
| 4                | 1                | 0              | 1.860786                | 0.237653  | -1.546483 |
| 5                | 6                | 0              | 0.607220                | 0.441750  | 0.201839  |
| 6                | 1                | 0              | 0.595061                | 1.022812  | 1.125055  |
| 7                | 6                | 0              | 0.626617                | -1.032362 | 0.599222  |
| 8                | 1                | 0              | 1.366182                | -1.145327 | 1.391780  |
| 9                | 6                | 0              | -0.745904               | -1.527538 | 1.102798  |
| 10               | 1                | 0              | -1.174269               | -0.730028 | 1.716784  |
| 11               | 6                | 0              | -0.543787               | -2.699647 | 1.989322  |
| 12               | 7                | 0              | -0.384355               | -3.620221 | 2.656417  |
| 13               | 8                | 0              | 1.665595                | 3.074178  | 0.202648  |
| 14               | 8                | 0              | 2.964846                | 0.491095  | 0.190684  |
| 15               | 8                | 0              | -0.536028               | 0.786034  | -0.583347 |
| 16               | 8                | 0              | 1.008568                | -1.846680 | -0.511651 |
| 17               | 6                | 0              | 0.623321                | 3.930062  | 0.237276  |
| 18               | 6                | 0              | -1.497181               | 1.546763  | 0.006049  |
| 19               | 6                | 0              | 3.982315                | -0.195579 | -0.380362 |
| 20               | 6                | 0              | 2.106276                | -2.646697 | -0.380034 |
| 21               | 6                | 0              | 0.499818                | 4.581224  | 1.578965  |
| 22               | 6                | 0              | -2.538322               | 1.967568  | -0.977467 |
| 23               | 6                | 0              | 2.357941                | -3.408482 | -1.640232 |
| 24               | 1                | 0              | -3.417606               | 2.317683  | -0.441688 |
| 25               | 1                | 0              | -2.118679               | 2.786455  | -1.567418 |
| 26               | 1                | 0              | -2.792396               | 1.145428  | -1.645607 |
| 27               | 1                | 0              | 1.475960                | 4.720766  | 2.040241  |
| 28               | 1                | 0              | -0.023462               | 5.529301  | 1.474436  |
| 29               | 1                | 0              | -0.096607               | 3.917300  | 2.210878  |
| 30               | 1                | 0              | 3.279031                | -3.976662 | -1.538348 |
| 31               | 1                | 0              | 1.519122                | -4.081472 | -1.829330 |
| 32               | 1                | 0              | 2.434409                | -2.709802 | -2.474271 |
| 33               | 6                | 0              | 5.083199                | -0.433835 | 0.602850  |
| 34               | 1                | 0              | 4.687542                | -0.997928 | 1.448856  |
| 35               | 1                | 0              | 5.884800                | -0.988884 | 0.122003  |
| 36               | 1                | 0              | 5.452986                | 0.523473  | 0.974406  |
| 37               | 7                | 0              | -1.627938               | -1.873345 | 0.021108  |
| 38               | 8                | 0              | -0.117669               | 4.110391  | -0.693049 |
| 39               | 8                | 0              | 3.966266                | -0.556120 | -1.527033 |
| 40               | 8                | 0              | -1.460668               | 1.845958  | 1.170788  |
| 41               | 8                | 0              | 2.755099                | -2.695593 | 0.626494  |
| 42               | 1                | 0              | 1.082590                | 2.515576  | -1.710317 |
| 43               | 1                | 0              | -1.157628               | -2.176904 | -0.819394 |
| 44               | 6                | 0              | -2.912450               | -1.375033 | -0.140296 |
| 45               | 6                | 0              | -3.523948               | -1.503235 | -1.398481 |
| 46               | 6                | 0              | -3.630483               | -0.767243 | 0.896574  |
| 47               | 6                | 0              | -4.802187               | -1.013894 | -1.614354 |
| 48               | 1                | 0              | -2.978407               | -1.986033 | -2.203248 |
| 49               | 6                | 0              | -4.910249               | -0.273377 | 0.661854  |
| 50               | 1                | 0              | -3.208266               | -0.684218 | 1.890349  |
| 51               | 6                | 0              | -5.505870               | -0.383474 | -0.588845 |
| 52               | 1                | 0              | -5.250929               | -1.121814 | -2.595609 |
| 53               | 1                | 0              | -5.444100               | 0.200681  | 1.477928  |
| 54               | 1                | 0              | -6.502752               | 0.003337  | -0.760276 |

#### Structure 42 R-X (M06-2X, Gas Phase)

Energy (Hartrees): = -1487.747819  
No imaginary frequencies

Standard orientation:

| Center | Atomic | Atomic | Coordinates (Angstroms) |  |  |
|--------|--------|--------|-------------------------|--|--|
|--------|--------|--------|-------------------------|--|--|

| Number | Number | Type | X         | Y         | Z         |
|--------|--------|------|-----------|-----------|-----------|
| 1      | 8      | 0    | -0.603280 | -1.801717 | 0.677977  |
| 2      | 8      | 0    | -1.950736 | -3.147480 | -0.524408 |
| 3      | 8      | 0    | -0.079492 | 1.122153  | 0.825614  |
| 4      | 8      | 0    | 1.132487  | 2.049936  | -0.822436 |
| 5      | 8      | 0    | -3.139180 | -0.162866 | -0.514603 |
| 6      | 8      | 0    | -4.087030 | -1.414003 | 1.094911  |
| 7      | 8      | 0    | -2.504322 | 2.728514  | -0.384231 |
| 8      | 8      | 0    | -1.081341 | 3.991720  | 0.822356  |
| 9      | 7      | 0    | 1.578677  | -3.389195 | -1.880599 |
| 10     | 7      | 0    | 1.922029  | -0.746975 | 0.289113  |
| 11     | 6      | 0    | 1.360834  | -2.347340 | -1.449759 |
| 12     | 6      | 0    | 1.078719  | -1.020029 | -0.847957 |
| 13     | 1      | 0    | 1.243766  | -0.252663 | -1.609807 |
| 14     | 6      | 0    | 3.304604  | -0.579612 | 0.146213  |
| 15     | 6      | 0    | 4.100448  | -0.585763 | 1.299306  |
| 16     | 1      | 0    | 3.634739  | -0.764535 | 2.263283  |
| 17     | 6      | 0    | 5.464756  | -0.363219 | 1.212894  |
| 18     | 1      | 0    | 6.062759  | -0.374684 | 2.116609  |
| 19     | 6      | 0    | 6.066572  | -0.127029 | -0.020535 |
| 20     | 1      | 0    | 7.133002  | 0.045707  | -0.086862 |
| 21     | 6      | 0    | 5.279374  | -0.123494 | -1.163590 |
| 22     | 1      | 0    | 5.731763  | 0.050101  | -2.132801 |
| 23     | 6      | 0    | 3.908711  | -0.349638 | -1.091657 |
| 24     | 1      | 0    | 3.326005  | -0.350624 | -2.003647 |
| 25     | 6      | 0    | -0.405366 | -0.951978 | -0.454163 |
| 26     | 1      | 0    | -1.005725 | -1.326448 | -1.284519 |
| 27     | 6      | 0    | -1.435603 | -2.873455 | 0.520023  |
| 28     | 6      | 0    | -1.645337 | -3.587834 | 1.817819  |
| 29     | 1      | 0    | -2.450934 | -3.065741 | 2.340870  |
| 30     | 1      | 0    | -0.747196 | -3.564560 | 2.431625  |
| 31     | 1      | 0    | -1.957545 | -4.609026 | 1.614368  |
| 32     | 6      | 0    | -0.888981 | 0.462264  | -0.138949 |
| 33     | 1      | 0    | -0.882535 | 1.027504  | -1.073264 |
| 34     | 6      | 0    | 0.950654  | 1.866946  | 0.351494  |
| 35     | 6      | 0    | 1.759660  | 2.439233  | 1.469060  |
| 36     | 1      | 0    | 1.915474  | 1.684623  | 2.239116  |
| 37     | 1      | 0    | 1.191431  | 3.270211  | 1.894180  |
| 38     | 1      | 0    | 2.709234  | 2.795188  | 1.077186  |
| 39     | 6      | 0    | -2.293047 | 0.469521  | 0.449673  |
| 40     | 1      | 0    | -2.313476 | -0.101228 | 1.378873  |
| 41     | 6      | 0    | -3.997479 | -1.110728 | -0.062754 |
| 42     | 6      | 0    | -4.759192 | -1.729683 | -1.193547 |
| 43     | 1      | 0    | -4.122592 | -2.510678 | -1.616001 |
| 44     | 1      | 0    | -4.973286 | -0.992952 | -1.965480 |
| 45     | 1      | 0    | -5.671484 | -2.178595 | -0.808760 |
| 46     | 6      | 0    | -2.769388 | 1.884133  | 0.738526  |
| 47     | 1      | 0    | -3.847651 | 1.878428  | 0.899402  |
| 48     | 1      | 0    | -2.260280 | 2.276185  | 1.617483  |
| 49     | 6      | 0    | -1.593545 | 3.717408  | -0.227452 |
| 50     | 6      | 0    | -1.285020 | 4.375075  | -1.539448 |
| 51     | 1      | 0    | -2.153048 | 4.369257  | -2.195348 |
| 52     | 1      | 0    | -0.481176 | 3.798669  | -2.005696 |
| 53     | 1      | 0    | -0.929945 | 5.386814  | -1.358883 |
| 54     | 1      | 0    | 1.638661  | -1.256492 | 1.115862  |

#### Structure 42 $\text{I}_5\text{G}^-$ (M06-2X, Gas Phase)

Energy (Hartrees): -1409.3879334  
No imaginary frequencies

| Standard orientation: |               |             |                         |           |           |
|-----------------------|---------------|-------------|-------------------------|-----------|-----------|
| Center Number         | Atomic Number | Atomic Type | Coordinates (Angstroms) |           |           |
|                       |               |             | X                       | Y         | Z         |
| 1                     | 6             | 0           | 0.456049                | 2.860554  | -0.038276 |
| 2                     | 1             | 0           | -0.085360               | 3.757643  | -0.339001 |
| 3                     | 6             | 0           | -0.515368               | 1.698066  | 0.063104  |
| 4                     | 1             | 0           | -1.121419               | 1.833585  | 0.959604  |
| 5                     | 6             | 0           | 0.196828                | 0.350115  | 0.125995  |
| 6                     | 1             | 0           | 0.824409                | 0.219836  | -0.757003 |
| 7                     | 6             | 0           | -0.803807               | -0.798057 | 0.180838  |
| 8                     | 1             | 0           | -1.338064               | -0.823601 | -0.769859 |
| 9                     | 6             | 0           | -0.188075               | -2.196058 | 0.370666  |
| 10                    | 1             | 0           | -1.003735               | -2.919123 | 0.271540  |
| 11                    | 6             | 0           | 0.405712                | -2.372792 | 1.709321  |
| 12                    | 7             | 0           | 0.888433                | -2.518267 | 2.740660  |
| 13                    | 8             | 0           | 1.443876                | 2.597730  | -1.038616 |
| 14                    | 8             | 0           | -1.367124               | 1.650052  | -1.084485 |
| 15                    | 8             | 0           | 1.012013                | 0.411682  | 1.297566  |
| 16                    | 8             | 0           | -1.723616               | -0.560057 | 1.241740  |
| 17                    | 6             | 0           | 2.725977                | 2.463411  | -0.630524 |
| 18                    | 6             | 0           | 2.279112                | -0.048701 | 1.224596  |

|    |   |   |           |           |           |
|----|---|---|-----------|-----------|-----------|
| 19 | 6 | 0 | -2.662233 | 2.020858  | -0.914341 |
| 20 | 6 | 0 | -3.046999 | -0.518714 | 0.927207  |
| 21 | 6 | 0 | 3.614212  | 2.043406  | -1.763238 |
| 22 | 6 | 0 | 3.004422  | 0.158314  | 2.511499  |
| 23 | 6 | 0 | -3.866746 | -0.116995 | 2.112821  |
| 24 | 1 | 0 | 4.023322  | -0.203890 | 2.409128  |
| 25 | 1 | 0 | 2.997621  | 1.222486  | 2.747515  |
| 26 | 1 | 0 | 2.478658  | -0.390087 | 3.295243  |
| 27 | 1 | 0 | 3.233569  | 2.399506  | -2.717817 |
| 28 | 1 | 0 | 4.623864  | 2.402439  | -1.578210 |
| 29 | 1 | 0 | 3.628661  | 0.950214  | -1.766013 |
| 30 | 1 | 0 | -4.884784 | -0.475430 | 1.982893  |
| 31 | 1 | 0 | -3.426884 | -0.488297 | 3.036043  |
| 32 | 1 | 0 | -3.873834 | 0.976109  | 2.134294  |
| 33 | 6 | 0 | -3.451574 | 1.804912  | -2.167908 |
| 34 | 1 | 0 | -3.731209 | 0.748785  | -2.190321 |
| 35 | 1 | 0 | -4.351391 | 2.413778  | -2.134740 |
| 36 | 1 | 0 | -2.851594 | 2.030097  | -3.047602 |
| 37 | 7 | 0 | 0.763703  | -2.507298 | -0.667778 |
| 38 | 6 | 0 | 0.459642  | -3.435821 | -1.632326 |
| 39 | 6 | 0 | 1.577598  | -3.722608 | -2.607530 |
| 40 | 1 | 0 | 2.084402  | -4.635917 | -2.289704 |
| 41 | 1 | 0 | 1.142023  | -3.899301 | -3.588911 |
| 42 | 1 | 0 | 2.307966  | -2.915232 | -2.659910 |
| 43 | 8 | 0 | 3.083216  | 2.620563  | 0.504720  |
| 44 | 8 | 0 | -3.092627 | 2.432682  | 0.126997  |
| 45 | 8 | 0 | 2.725719  | -0.566179 | 0.229470  |
| 46 | 8 | 0 | -3.461867 | -0.738011 | -0.175521 |
| 47 | 8 | 0 | -0.615379 | -3.988847 | -1.681053 |
| 48 | 1 | 0 | 0.943071  | 3.023451  | 0.921625  |
| 49 | 1 | 0 | 1.673552  | -2.064370 | -0.626934 |

#### Structure 42 $\text{I}^+\text{G}^-\text{G}^-$ (M06-2X, $\text{CHCl}_3$ )

Energy (Hartrees): = -1409.4123463

No imaginary frequencies

Standard orientation:

| Center<br>Number | Atomic<br>Number | Atomic<br>Type | Coordinates (Angstroms) |           |           |
|------------------|------------------|----------------|-------------------------|-----------|-----------|
|                  |                  |                | X                       | Y         | Z         |
| 1                | 6                | 0              | 0.899162                | 2.804278  | 0.033026  |
| 2                | 1                | 0              | 0.499014                | 3.784077  | -0.227755 |
| 3                | 6                | 0              | -0.234875               | 1.800346  | 0.105918  |
| 4                | 1                | 0              | -0.830702               | 2.019477  | 0.992473  |
| 5                | 6                | 0              | 0.262825                | 0.356511  | 0.166049  |
| 6                | 1                | 0              | 0.904539                | 0.146218  | -0.691774 |
| 7                | 6                | 0              | -0.900552               | -0.625893 | 0.144429  |
| 8                | 1                | 0              | -1.395725               | -0.537003 | -0.823014 |
| 9                | 6                | 0              | -0.518858               | -2.111012 | 0.294249  |
| 10               | 1                | 0              | -1.434472               | -2.692199 | 0.147537  |
| 11               | 6                | 0              | -0.019495               | -2.422677 | 1.647417  |
| 12               | 7                | 0              | 0.383892                | -2.674924 | 2.692074  |
| 13               | 8                | 0              | 1.828497                | 2.438143  | -0.993077 |
| 14               | 8                | 0              | -1.057340               | 1.900579  | -1.062011 |
| 15               | 8                | 0              | 1.017954                | 0.271728  | 1.376908  |
| 16               | 8                | 0              | -1.805263               | -0.282826 | 1.188946  |
| 17               | 6                | 0              | 3.069344                | 2.061193  | -0.617356 |
| 18               | 6                | 0              | 2.201923                | -0.377570 | 1.355565  |
| 19               | 6                | 0              | -2.332978               | 2.332226  | -0.903618 |
| 20               | 6                | 0              | -3.124694               | -0.181093 | 0.871509  |
| 21               | 6                | 0              | 3.882162                | 1.641777  | -1.802446 |
| 22               | 6                | 0              | 2.903492                | -0.266129 | 2.666217  |
| 23               | 6                | 0              | -3.922811               | 0.251074  | 2.057350  |
| 24               | 1                | 0              | 3.861998                | -0.775220 | 2.608168  |
| 25               | 1                | 0              | 3.043916                | 0.788598  | 2.905384  |
| 26               | 1                | 0              | 2.279397                | -0.719386 | 3.439445  |
| 27               | 1                | 0              | 3.848789                | 2.415667  | -2.570109 |
| 28               | 1                | 0              | 4.906376                | 1.451740  | -1.491892 |
| 29               | 1                | 0              | 3.449835                | 0.731313  | -2.223479 |
| 30               | 1                | 0              | -4.982455               | 0.196521  | 1.821042  |
| 31               | 1                | 0              | -3.683954               | -0.374195 | 2.918102  |
| 32               | 1                | 0              | -3.648568               | 1.281511  | 2.293786  |
| 33               | 6                | 0              | -3.080205               | 2.277528  | -2.197146 |
| 34               | 1                | 0              | -3.291934               | 1.228345  | -2.418322 |
| 35               | 1                | 0              | -4.016210               | 2.821754  | -2.099236 |
| 36               | 1                | 0              | -2.474122               | 2.684457  | -3.006275 |
| 37               | 7                | 0              | 0.415909                | -2.537274 | -0.716158 |
| 38               | 6                | 0              | 0.042802                | -3.410375 | -1.701022 |
| 39               | 6                | 0              | 1.129331                | -3.760752 | -2.684585 |
| 40               | 1                | 0              | 1.118807                | -4.839188 | -2.841991 |
| 41               | 1                | 0              | 0.896859                | -3.280363 | -3.637447 |
| 42               | 1                | 0              | 2.119235                | -3.444992 | -2.355621 |
| 43               | 8                | 0              | 3.444025                | 2.056844  | 0.525563  |
| 44               | 8                | 0              | -2.780479               | 2.680606  | 0.155642  |

|    |   |   |           |           |           |
|----|---|---|-----------|-----------|-----------|
| 45 | 8 | 0 | 2.597801  | -0.974764 | 0.384719  |
| 46 | 8 | 0 | -3.543556 | -0.400362 | -0.231461 |
| 47 | 8 | 0 | -1.087893 | -3.848219 | -1.786352 |
| 48 | 1 | 0 | 1.408668  | 2.858737  | 0.993387  |
| 49 | 1 | 0 | 1.372696  | -2.210910 | -0.648168 |

#### Structure 42 $\text{I}^-\text{G}^-\text{S}^-\text{G}^-$ (M06-2X, Gas Phase)

Energy (Hartrees): =-1409.3787268

No imaginary frequencies

Standard orientation:

| Center<br>Number | Atomic<br>Number | Atomic<br>Type | Coordinates (Angstroms) |           |           |
|------------------|------------------|----------------|-------------------------|-----------|-----------|
|                  |                  |                | X                       | Y         | Z         |
| 1                | 6                | 0              | -2.579844               | 1.285724  | 0.411472  |
| 2                | 1                | 0              | -2.849183               | 0.946455  | 1.413856  |
| 3                | 6                | 0              | -1.095053               | 1.115904  | 0.145497  |
| 4                | 1                | 0              | -0.868703               | 1.339481  | -0.896815 |
| 5                | 6                | 0              | -0.538055               | -0.265953 | 0.504350  |
| 6                | 1                | 0              | -0.867043               | -0.559666 | 1.505159  |
| 7                | 6                | 0              | 0.984840                | -0.255421 | 0.462640  |
| 8                | 1                | 0              | 1.361855                | 0.299487  | 1.323420  |
| 9                | 6                | 0              | 1.612892                | -1.663282 | 0.432858  |
| 10               | 1                | 0              | 1.468599                | -2.065488 | -0.572831 |
| 11               | 6                | 0              | 0.960354                | -2.559533 | 1.398699  |
| 12               | 7                | 0              | 0.435385                | -3.234436 | 2.164592  |
| 13               | 8                | 0              | -3.279657               | 0.513546  | -0.562389 |
| 14               | 8                | 0              | -0.418642               | 2.043150  | 1.004971  |
| 15               | 8                | 0              | -0.986741               | -1.236990 | -0.439147 |
| 16               | 8                | 0              | 1.396883                | 0.391075  | -0.737892 |
| 17               | 6                | 0              | -4.604797               | 0.379387  | -0.326417 |
| 18               | 6                | 0              | -2.080020               | -1.971831 | -0.108408 |
| 19               | 6                | 0              | 0.260867                | 3.070786  | 0.434659  |
| 20               | 6                | 0              | 2.475381                | 1.206343  | -0.694989 |
| 21               | 6                | 0              | -5.221541               | -0.626184 | -1.255111 |
| 22               | 6                | 0              | -2.395179               | -2.944921 | -1.205098 |
| 23               | 6                | 0              | 2.819679                | 1.691459  | -2.065548 |
| 24               | 1                | 0              | -3.215273               | -3.587529 | -0.895381 |
| 25               | 1                | 0              | -2.666430               | -2.383015 | -2.101057 |
| 26               | 1                | 0              | -1.511842               | -3.540215 | -1.438017 |
| 27               | 1                | 0              | -5.010280               | -1.619307 | -0.850143 |
| 28               | 1                | 0              | -6.297425               | -0.475366 | -1.287056 |
| 29               | 1                | 0              | -4.786798               | -0.554101 | -2.251229 |
| 30               | 1                | 0              | 3.634202                | 2.407841  | -2.001116 |
| 31               | 1                | 0              | 3.111129                | 0.824826  | -2.662860 |
| 32               | 1                | 0              | 1.936652                | 2.150232  | -2.510483 |
| 33               | 6                | 0              | 0.989626                | 3.867786  | 1.475132  |
| 34               | 1                | 0              | 1.939893                | 3.361980  | 1.664991  |
| 35               | 1                | 0              | 1.188261                | 4.863917  | 1.087557  |
| 36               | 1                | 0              | 0.421167                | 3.909442  | 2.402104  |
| 37               | 7                | 0              | 3.039580                | -1.616223 | 0.674643  |
| 38               | 6                | 0              | 3.921234                | -1.465218 | -0.372499 |
| 39               | 6                | 0              | 5.327585                | -1.114580 | 0.048040  |
| 40               | 1                | 0              | 6.004147                | -1.335532 | -0.773582 |
| 41               | 1                | 0              | 5.357421                | -0.043084 | 0.264381  |
| 42               | 1                | 0              | 5.630537                | -1.661039 | 0.941976  |
| 43               | 8                | 0              | -5.172897               | 0.978647  | 0.539072  |
| 44               | 8                | 0              | 0.288847                | 3.269665  | -0.746353 |
| 45               | 8                | 0              | -2.688411               | -1.829985 | 0.911223  |
| 46               | 8                | 0              | 3.055373                | 1.467580  | 0.326942  |
| 47               | 8                | 0              | 3.577050                | -1.579626 | -1.527458 |
| 48               | 1                | 0              | -2.848703               | 2.340219  | 0.312426  |
| 49               | 1                | 0              | 3.340810                | -1.304218 | 1.586648  |

#### Structure 42 $\text{I}^-\text{G}^-\text{S}^-\text{G}^-$ (M06-2X, $\text{CHCl}_3$ )

Energy (Hartrees): = -1409.4072708

No imaginary frequencies

Standard orientation:

| Center<br>Number | Atomic<br>Number | Atomic<br>Type | Coordinates (Angstroms) |           |           |
|------------------|------------------|----------------|-------------------------|-----------|-----------|
|                  |                  |                | X                       | Y         | Z         |
| 1                | 6                | 0              | 2.598209                | 1.262887  | -0.348326 |
| 2                | 1                | 0              | 2.882553                | 0.933233  | -1.349365 |
| 3                | 6                | 0              | 1.102346                | 1.127215  | -0.123930 |
| 4                | 1                | 0              | 0.857302                | 1.330052  | 0.918517  |
| 5                | 6                | 0              | 0.526304                | -0.229511 | -0.536060 |
| 6                | 1                | 0              | 0.852176                | -0.480913 | -1.548667 |
| 7                | 6                | 0              | -0.996778               | -0.207117 | -0.505646 |
| 8                | 1                | 0              | -1.361334               | 0.354338  | -1.366189 |

|    |   |   |           |           |           |
|----|---|---|-----------|-----------|-----------|
| 9  | 6 | 0 | -1.630704 | -1.611041 | -0.489378 |
| 10 | 1 | 0 | -1.427643 | -2.062502 | 0.485029  |
| 11 | 6 | 0 | -1.034110 | -2.473418 | -1.520477 |
| 12 | 7 | 0 | -0.534062 | -3.122341 | -2.324364 |
| 13 | 8 | 0 | 3.248259  | 0.456902  | 0.636414  |
| 14 | 8 | 0 | 0.470271  | 2.090139  | -0.976554 |
| 15 | 8 | 0 | 0.966321  | -1.242443 | 0.368561  |
| 16 | 8 | 0 | -1.438367 | 0.417156  | 0.696866  |
| 17 | 6 | 0 | 4.567367  | 0.262093  | 0.445847  |
| 18 | 6 | 0 | 2.025804  | -2.003893 | -0.002643 |
| 19 | 6 | 0 | -0.181228 | 3.133493  | -0.406163 |
| 20 | 6 | 0 | -2.448980 | 1.316394  | 0.622903  |
| 21 | 6 | 0 | 5.129363  | -0.707235 | 1.440690  |
| 22 | 6 | 0 | 2.286577  | -3.064137 | 1.020414  |
| 23 | 6 | 0 | -2.867069 | 1.748342  | 1.990234  |
| 24 | 1 | 0 | 3.163270  | -3.642009 | 0.738044  |
| 25 | 1 | 0 | 2.425256  | -2.603006 | 1.999798  |
| 26 | 1 | 0 | 1.414177  | -3.719213 | 1.079468  |
| 27 | 1 | 0 | 4.938167  | -1.718937 | 1.072497  |
| 28 | 1 | 0 | 6.204281  | -0.560298 | 1.520828  |
| 29 | 1 | 0 | 4.649276  | -0.593506 | 2.411803  |
| 30 | 1 | 0 | -3.628814 | 2.520430  | 1.913540  |
| 31 | 1 | 0 | -3.253604 | 0.879006  | 2.527670  |
| 32 | 1 | 0 | -1.996187 | 2.122197  | 2.530099  |
| 33 | 6 | 0 | -0.803530 | 4.001774  | -1.453248 |
| 34 | 1 | 0 | -1.522761 | 3.410128  | -2.022283 |
| 35 | 1 | 0 | -1.304437 | 4.840907  | -0.976905 |
| 36 | 1 | 0 | -0.033693 | 4.356809  | -2.140347 |
| 37 | 7 | 0 | -3.063622 | -1.528569 | -0.635479 |
| 38 | 6 | 0 | -3.885067 | -1.572858 | 0.463385  |
| 39 | 6 | 0 | -5.312908 | -1.178508 | 0.187331  |
| 40 | 1 | 0 | -5.952853 | -1.587356 | 0.966360  |
| 41 | 1 | 0 | -5.379304 | -0.086599 | 0.209286  |
| 42 | 1 | 0 | -5.646466 | -1.522840 | -0.792257 |
| 43 | 8 | 0 | 5.181022  | 0.799352  | -0.435797 |
| 44 | 8 | 0 | -0.240134 | 3.301586  | 0.781002  |
| 45 | 8 | 0 | 2.632694  | -1.831281 | -1.022609 |
| 46 | 8 | 0 | -2.920854 | 1.684764  | -0.420398 |
| 47 | 8 | 0 | -3.475851 | -1.878095 | 1.565564  |
| 48 | 1 | 0 | 2.891494  | 2.307912  | -0.219347 |
| 49 | 1 | 0 | -3.427538 | -1.132997 | -1.492668 |

#### Structure 42 $\text{sG}^-$ (M06-2X, Gas Phase)

Energy (Hartrees): = -1409.3826589  
No imaginary frequencies

Standard orientation:

| Center<br>Number | Atomic<br>Number | Atomic<br>Type | Coordinates (Angstroms) |           |           |
|------------------|------------------|----------------|-------------------------|-----------|-----------|
|                  |                  |                | X                       | Y         | Z         |
| 1                | 6                | 0              | 1.079380                | -2.316540 | -0.926493 |
| 2                | 1                | 0              | 0.748182                | -3.270786 | -1.340224 |
| 3                | 6                | 0              | -0.131400               | -1.491618 | -0.543011 |
| 4                | 1                | 0              | -0.668140               | -1.223393 | -1.453774 |
| 5                | 6                | 0              | 0.232124                | -0.236529 | 0.244852  |
| 6                | 1                | 0              | 0.707599                | -0.526299 | 1.183440  |
| 7                | 6                | 0              | -1.009861               | 0.583297  | 0.594326  |
| 8                | 1                | 0              | -1.517789               | 0.079497  | 1.417108  |
| 9                | 6                | 0              | -0.680133               | 2.033746  | 0.998603  |
| 10               | 1                | 0              | 0.238983                | 2.054880  | 1.593579  |
| 11               | 6                | 0              | -1.788070               | 2.570753  | 1.813091  |
| 12               | 7                | 0              | -2.673697               | 2.976573  | 2.419913  |
| 13               | 8                | 0              | 1.866483                | -2.579508 | 0.235116  |
| 14               | 8                | 0              | -0.992535               | -2.245352 | 0.317685  |
| 15               | 8                | 0              | 1.169520                | 0.502267  | -0.536441 |
| 16               | 8                | 0              | -1.912740               | 0.655010  | -0.515573 |
| 17               | 6                | 0              | 3.186542                | -2.288989 | 0.175246  |
| 18               | 6                | 0              | 2.395227                | 0.737414  | 0.027836  |
| 19               | 6                | 0              | -2.092406               | -2.809962 | -0.233251 |
| 20               | 6                | 0              | -3.150709               | 0.096916  | -0.368397 |
| 21               | 6                | 0              | 3.851611                | -2.536199 | 1.494599  |
| 22               | 6                | 0              | 3.345874                | 1.354614  | -0.947849 |
| 23               | 6                | 0              | -3.924941               | 0.169354  | -1.648011 |
| 24               | 1                | 0              | 4.025667                | 0.563328  | -1.272273 |
| 25               | 1                | 0              | 2.822169                | 1.763946  | -1.808671 |
| 26               | 1                | 0              | 3.905536                | 2.132733  | -0.433843 |
| 27               | 1                | 0              | 3.420858                | -3.404143 | 1.990054  |
| 28               | 1                | 0              | 4.920692                | -2.658209 | 1.339892  |
| 29               | 1                | 0              | 3.675040                | -1.651537 | 2.110853  |
| 30               | 1                | 0              | -4.982825               | 0.048118  | -1.430118 |
| 31               | 1                | 0              | -3.736290               | 1.105779  | -2.169753 |
| 32               | 1                | 0              | -3.588665               | -0.661154 | -2.273833 |
| 33               | 6                | 0              | -2.893742               | -3.541755 | 0.798726  |
| 34               | 1                | 0              | -3.432076               | -2.793687 | 1.384546  |
| 35               | 1                | 0              | -3.603500               | -4.198619 | 0.302829  |

|    |   |   |           |           |           |
|----|---|---|-----------|-----------|-----------|
| 36 | 1 | 0 | -2.237501 | -4.099810 | 1.464709  |
| 37 | 7 | 0 | -0.465306 | 2.882350  | -0.149569 |
| 38 | 6 | 0 | 0.742077  | 3.478053  | -0.389644 |
| 39 | 6 | 0 | 0.834290  | 4.180669  | -1.724267 |
| 40 | 1 | 0 | 1.747379  | 4.769800  | -1.746068 |
| 41 | 1 | 0 | 0.863896  | 3.434372  | -2.522222 |
| 42 | 1 | 0 | -0.029350 | 4.826356  | -1.890209 |
| 43 | 8 | 0 | 3.722634  | -1.858719 | -0.809144 |
| 44 | 8 | 0 | -2.373605 | -2.695581 | -1.395388 |
| 45 | 8 | 0 | 2.654778  | 0.427680  | 1.155514  |
| 46 | 8 | 0 | -3.519227 | -0.411846 | 0.649385  |
| 47 | 8 | 0 | 1.659402  | 3.424449  | 0.400575  |
| 48 | 1 | 0 | 1.676312  | -1.786543 | -1.667344 |
| 49 | 1 | 0 | -1.156023 | 2.836365  | -0.883059 |

#### Structure 42 $\text{S}^-\text{G}^-$ (M06-2X, $\text{CHCl}_3$ )

Energy (Hartrees): =-1409.4095537  
No imaginary frequencies

Standard orientation:

| Center<br>Number | Atomic<br>Number | Atomic<br>Type | Coordinates (Angstroms) |           |           |
|------------------|------------------|----------------|-------------------------|-----------|-----------|
|                  |                  |                | X                       | Y         | Z         |
| 1                | 6                | 0              | 1.337384                | -2.198527 | -0.902042 |
| 2                | 1                | 0              | 1.115373                | -3.188320 | -1.306459 |
| 3                | 6                | 0              | 0.044452                | -1.506772 | -0.530025 |
| 4                | 1                | 0              | -0.506704               | -1.305338 | -1.449077 |
| 5                | 6                | 0              | 0.259475                | -0.209487 | 0.246409  |
| 6                | 1                | 0              | 0.767627                | -0.424505 | 1.187952  |
| 7                | 6                | 0              | -1.073288               | 0.457694  | 0.582517  |
| 8                | 1                | 0              | -1.524185               | -0.107540 | 1.398492  |
| 9                | 6                | 0              | -0.926332               | 1.931719  | 1.003845  |
| 10               | 1                | 0              | -0.049737               | 2.045073  | 1.649455  |
| 11               | 6                | 0              | -2.120040               | 2.333473  | 1.775179  |
| 12               | 7                | 0              | -3.064383               | 2.640779  | 2.350448  |
| 13               | 8                | 0              | 2.151374                | -2.360327 | 0.262403  |
| 14               | 8                | 0              | -0.740839               | -2.342379 | 0.329322  |
| 15               | 8                | 0              | 1.092624                | 0.628696  | -0.554366 |
| 16               | 8                | 0              | -1.955918               | 0.426668  | -0.543752 |
| 17               | 6                | 0              | 3.440973                | -1.967854 | 0.189905  |
| 18               | 6                | 0              | 2.304384                | 0.988855  | -0.043276 |
| 19               | 6                | 0              | -1.786026               | -3.006088 | -0.216257 |
| 20               | 6                | 0              | -3.145394               | -0.225567 | -0.409154 |
| 21               | 6                | 0              | 4.133055                | -2.160248 | 1.502268  |
| 22               | 6                | 0              | 3.128057                | 1.722467  | -1.051996 |
| 23               | 6                | 0              | -3.911025               | -0.196866 | -1.691881 |
| 24               | 1                | 0              | 3.830520                | 1.000168  | -1.477646 |
| 25               | 1                | 0              | 2.512867                | 2.138988  | -1.847250 |
| 26               | 1                | 0              | 3.688389                | 2.506057  | -0.545777 |
| 27               | 1                | 0              | 3.966565                | -3.173073 | 1.870234  |
| 28               | 1                | 0              | 5.195853                | -1.963601 | 1.384374  |
| 29               | 1                | 0              | 3.704874                | -1.458238 | 2.220594  |
| 30               | 1                | 0              | -4.877265               | -0.673472 | -1.546747 |
| 31               | 1                | 0              | -4.040294               | 0.834792  | -2.022793 |
| 32               | 1                | 0              | -3.340934               | -0.733493 | -2.452534 |
| 33               | 6                | 0              | -2.489642               | -3.831990 | 0.812459  |
| 34               | 1                | 0              | -2.878579               | -3.169097 | 1.587250  |
| 35               | 1                | 0              | -3.304386               | -4.378299 | 0.343615  |
| 36               | 1                | 0              | -1.782325               | -4.522147 | 1.275000  |
| 37               | 7                | 0              | -0.760806               | 2.819149  | -0.120333 |
| 38               | 6                | 0              | 0.374145                | 3.555902  | -0.299001 |
| 39               | 6                | 0              | 0.410700                | 4.336901  | -1.587592 |
| 40               | 1                | 0              | 1.354915                | 4.872671  | -1.652455 |
| 41               | 1                | 0              | 0.308474                | 3.660457  | -2.439295 |
| 42               | 1                | 0              | -0.417289               | 5.048674  | -1.618202 |
| 43               | 8                | 0              | 3.937544                | -1.515713 | -0.807969 |
| 44               | 8                | 0              | -2.086916               | -2.911387 | -1.376506 |
| 45               | 8                | 0              | 2.658737                | 0.692159  | 1.064221  |
| 46               | 8                | 0              | -3.487761               | -0.747955 | 0.614042  |
| 47               | 8                | 0              | 1.273884                | 3.565435  | 0.520112  |
| 48               | 1                | 0              | 1.868602                | -1.616743 | -1.654014 |
| 49               | 1                | 0              | -1.443116               | 2.764237  | -0.863717 |

#### Structure 42 R-X (M06-2X, Gas Phase)

Energy (Hartrees): = -1409.3803048  
No imaginary frequencies

Standard orientation:

| Center<br>Number | Atomic<br>Number | Atomic<br>Type | Coordinates (Angstroms) |   |   |
|------------------|------------------|----------------|-------------------------|---|---|
|                  |                  |                | X                       | Y | Z |

|    |   |   |           |           |           |
|----|---|---|-----------|-----------|-----------|
| 1  | 6 | 0 | -1.576754 | 1.218634  | -0.922864 |
| 2  | 1 | 0 | -1.749201 | 0.514540  | -1.741909 |
| 3  | 6 | 0 | -0.131391 | 1.101562  | -0.420917 |
| 4  | 1 | 0 | 0.544635  | 1.511843  | -1.172771 |
| 5  | 6 | 0 | 0.312411  | -0.328183 | -0.138240 |
| 6  | 1 | 0 | 0.251743  | -0.889974 | -1.072363 |
| 7  | 6 | 0 | 1.741219  | -0.391541 | 0.386056  |
| 8  | 1 | 0 | 1.851791  | 0.216956  | 1.287528  |
| 9  | 6 | 0 | 2.158172  | -1.813453 | 0.724007  |
| 10 | 1 | 0 | 3.236732  | -1.846257 | 0.874161  |
| 11 | 1 | 0 | 1.643403  | -2.153161 | 1.621162  |
| 12 | 6 | 0 | 0.937600  | -3.659583 | -0.161820 |
| 13 | 6 | 0 | 0.613861  | -4.375063 | -1.439026 |
| 14 | 1 | 0 | -0.196216 | -3.821628 | -1.921517 |
| 15 | 1 | 0 | 0.265036  | -5.378939 | -1.209209 |
| 16 | 1 | 0 | 1.474417  | -4.395864 | -2.104368 |
| 17 | 6 | 0 | 3.687713  | 0.772381  | -0.268256 |
| 18 | 6 | 0 | 4.330061  | 1.485749  | -1.417232 |
| 19 | 1 | 0 | 4.284895  | 0.877087  | -2.319349 |
| 20 | 1 | 0 | 5.357403  | 1.731326  | -1.161064 |
| 21 | 1 | 0 | 3.762270  | 2.403059  | -1.587126 |
| 22 | 6 | 0 | -1.490582 | -1.766849 | 0.401514  |
| 23 | 6 | 0 | -2.279195 | -2.327496 | 1.542406  |
| 24 | 1 | 0 | -1.665854 | -3.097030 | 2.016206  |
| 25 | 1 | 0 | -3.194929 | -2.771529 | 1.159738  |
| 26 | 1 | 0 | -2.492290 | -1.548807 | 2.274785  |
| 27 | 6 | 0 | 0.938078  | 2.830046  | 0.841909  |
| 28 | 6 | 0 | 0.788578  | 3.665277  | 2.077216  |
| 29 | 1 | 0 | 0.532632  | 3.039424  | 2.931073  |
| 30 | 1 | 0 | -0.026263 | 4.374199  | 1.915344  |
| 31 | 1 | 0 | 1.713230  | 4.207209  | 2.255134  |
| 32 | 6 | 0 | -3.815197 | 0.569009  | -0.219279 |
| 33 | 6 | 0 | -4.763243 | 0.366813  | 0.940495  |
| 34 | 1 | 0 | -4.340148 | 0.655258  | 1.902885  |
| 35 | 1 | 0 | -5.043039 | -0.687352 | 0.971283  |
| 36 | 1 | 0 | -5.666380 | 0.944977  | 0.747608  |
| 37 | 6 | 0 | -1.778287 | 2.594564  | -1.430398 |
| 38 | 7 | 0 | -2.528158 | 0.915289  | 0.123120  |
| 39 | 1 | 0 | -2.311541 | 1.251771  | 1.049507  |
| 40 | 7 | 0 | -1.899004 | 3.682596  | -1.775566 |
| 41 | 8 | 0 | 1.840186  | -2.676913 | -0.371590 |
| 42 | 8 | 0 | 0.441483  | -3.890304 | 0.907598  |
| 43 | 8 | 0 | 2.543901  | 0.154168  | -0.658636 |
| 44 | 8 | 0 | 4.083981  | 0.740582  | 0.861725  |
| 45 | 8 | 0 | -0.506734 | -0.945596 | 0.849636  |
| 46 | 8 | 0 | -1.659511 | -2.007668 | -0.761091 |
| 47 | 8 | 0 | -0.053664 | 1.900116  | 0.765883  |
| 48 | 8 | 0 | 1.791251  | 2.946285  | 0.011560  |
| 49 | 8 | 0 | -4.140951 | 0.407641  | -1.370466 |

-----
